# Supplementary material for: Physiological, Proteomic, and Resin Yield-Related Genes Expression Analysis Provides Insights into the Mechanisms Regulating Resin Yield in Masson Pine
Source: MDPI journal article supplement (doi:10.3390/ijms241813813), 2023-09-07
Supplement: s1 [file s1]

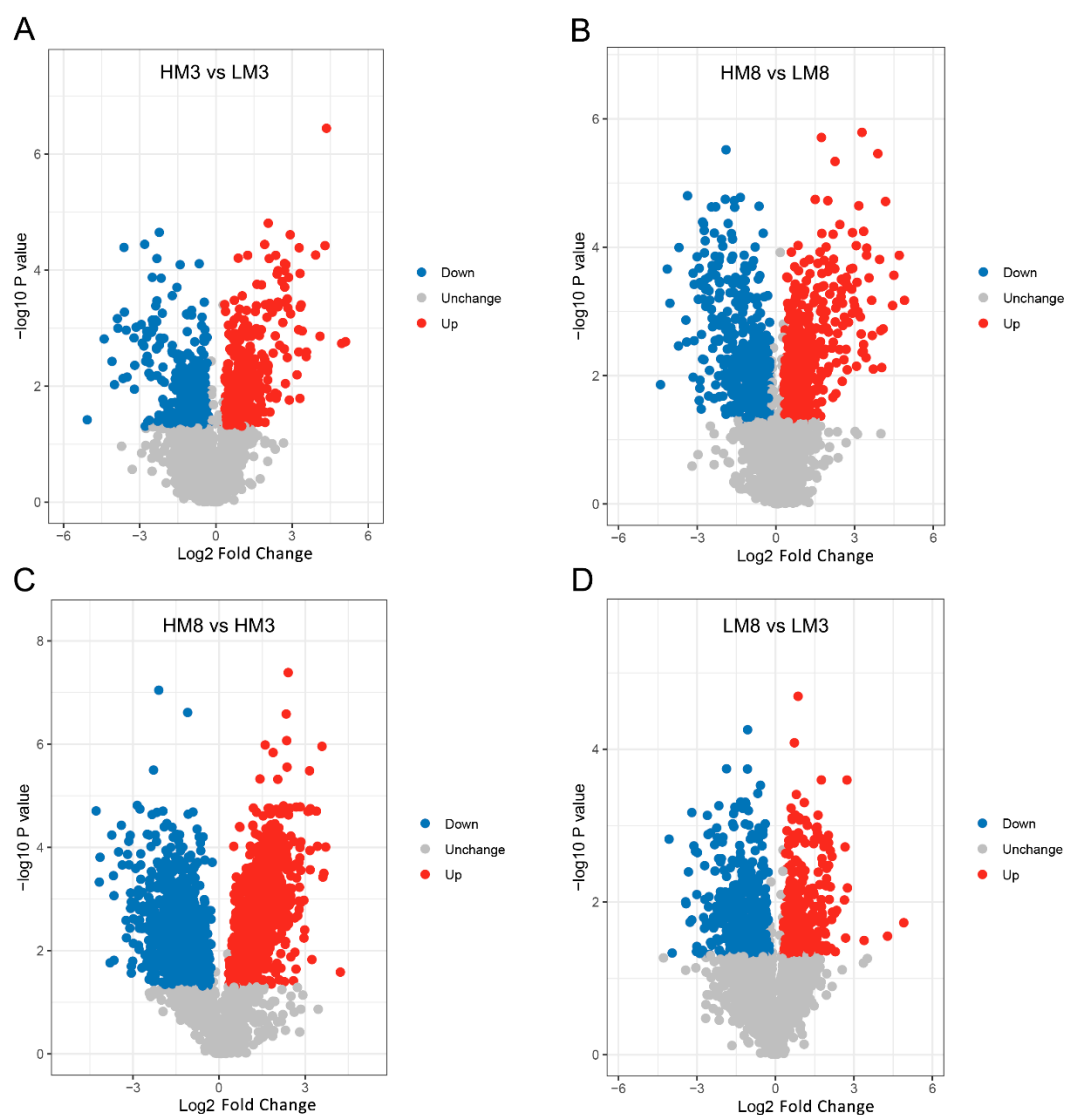

**Figure S1.** Volcano plots in HM3 vs. LM3 (A), HM8 vs. LM8 (B), HM8 vs. HM3 (C), and LM8 vs. LM3 (D). Red spots represent significant up-regulated proteins, blue spots represent significant down-regulated proteins, and gray spots represent nonsignificant regulated proteins.
