# Supplementary material for: Physiological, Proteomic, and Resin Yield-Related Genes Expression Analysis Provides Insights into the Mechanisms Regulating Resin Yield in Masson Pine
Source: Int J Mol Sci. 2023 Sep 7;24(18):13813. doi: 10.3390/ijms241813813 (PMC10531451; doi:10.3390/ijms241813813)
Supplement: Supplementary file 1 [file ijms-24-13813-s001.zip › Table S1.xlsx]

## Sheet: Sheet1
Table S1. All DEPs among four paired comparison groups (HM3 vs. LM3, HM8 vs. LM8, HM8 vs. HM3, and LM8 vs. LM3).
Protein	Description	HM3 vs. LM3			HM8 vs. LM8			HM8 vs. HM3			LM8 vs. LM3			Biological Process	Cellular Component	Molecular Function	KEGG Gene	KEGG pathway	KOG category	KOG description
		Ratio	Regulated Type	P value	Ratio	Regulated Type	P value	Ratio	Regulated Type	P value	Ratio	Regulated Type	P value
F02_cb6917_c4/f3p1/2140	unknown [Picea sitchensis]	4.308	Up	0.0004588	--	--	--	--	--	--	--	--	--	--	--	--	--	--	--	--
F02_cb878_c3/f2p0/3509	"""PREDICTED: chaperone protein ClpB4, mitochondrial [Beta vulgaris subsp. vulgaris]"""	1.262	Up	0.037165	1.395	Up	0.0056365	1.48	Up	0.00076378	1.339	Up	0.029998	--	--	GO:0005524 ATP binding; GO:1901265 nucleoside phosphate binding; GO:0001882 nucleoside binding; GO:0043167 ion binding; GO:0000166 nucleotide binding; GO:0097159 organic cyclic compound binding; GO:1901363 heterocyclic compound binding; GO:0032549 ribonucleoside binding; GO:0097367 carbohydrate derivative binding; GO:0032553 ribonucleotide binding; GO:0005488 binding; GO:0032550 purine ribonucleo…	--	--	O	Chaperone HSP104 and related ATP-dependent Clp proteases
F02_cb7997_c11/f1p0/1751	"""PREDICTED: Acyl-coenzyme A oxidase 4, peroxisomal OS=Arabidopsis thaliana GN=ACX4 PE=1 SV=1"""	0.333	Down	0.039644	0.548	Down	0.0023761	4.791	Up	0.0022612	2.91	--	0.057218	GO:0044699 single-organism process; GO:0008152 metabolic process; GO:0055114 oxidation-reduction process; GO:0044710 single-organism metabolic process;	--	GO:1901265 nucleoside phosphate binding; GO:0050660 flavin adenine dinucleotide binding; GO:0043167 ion binding; GO:0000166 nucleotide binding; GO:0048037 cofactor binding; GO:0016491 oxidoreductase activity; GO:0016627 oxidoreductase activity, acting on the CH-CH group of donors; GO:1901363 heterocyclic compound binding; GO:0097159 organic cyclic compound binding; GO:0003824 catalytic activity; …	csv:101209181; acyl-coenzyme A oxidase 4, peroxisomal-like; K00232 acyl-CoA oxidase [EC:1.3.3.6] (A)	ko04146 Peroxisome; ko00592 alpha-Linolenic acid metabolism; ko00071 Fatty acid degradation; ko01212 Fatty acid metabolism; ko01040 Biosynthesis of unsaturated fatty acids;	E	Glutaryl-CoA dehydrogenase
F01_cb15802_c1/f1p0/1504	PREDICTED: ELMO domain-containing protein A [Eucalyptus grandis]	0.561	Down	0.0040643	0.795	--	0.085995	1.235	--	0.108998	0.872	--	0.25674	--	--	--	--	--	S	Uncharacterized conserved protein
F01_cb8909_c7/f1p0/1361	"""PREDICTED: ATP-dependent Clp protease proteolytic subunit-related protein 1, chloroplastic OS=Arabidopsis thaliana GN=CLPR1 PE=1 SV=1"""	1.484	Up	0.0165154	--	--	--	--	--	--	--	--	--	GO:0006508 proteolysis; GO:0008152 metabolic process; GO:0043170 macromolecule metabolic process; GO:0019538 protein metabolic process; GO:0044238 primary metabolic process; GO:0071704 organic substance metabolic process;	--	GO:0004252 serine-type endopeptidase activity; GO:0004175 endopeptidase activity; GO:0008233 peptidase activity; GO:0003824 catalytic activity; GO:0017171 serine hydrolase activity; GO:0008236 serine-type peptidase activity; GO:0070011 peptidase activity, acting on L-amino acid peptides; GO:0016787 hydrolase activity;	--	--	O	ATP-dependent Clp protease, proteolytic subunit
F02_cb12550_c3/f4p0/1019	PREDICTED: Short-chain type dehydrogenase/reductase OS=Picea abies PE=2 SV=1	0.149	Down	0.0031001	0.289	Down	0.00051897	2.1	Up	0.021823	1.083	--	0.6231	--	--	GO:0003824 catalytic activity; GO:0016491 oxidoreductase activity;	atr:s00005p00200590; AMTR_s00005p00200590; hypothetical protein; K00059 3-oxoacyl-[acyl-carrier protein] reductase [EC:1.1.1.100] (A)	ko00061 Fatty acid biosynthesis; ko01212 Fatty acid metabolism; ko00780 Biotin metabolism; ko01040 Biosynthesis of unsaturated fatty acids;	R	Reductases with broad range of substrate specificities
F01_cb11001_c3/f1p0/962	PREDICTED: Universal stress protein A-like protein OS=Arabidopsis thaliana GN=At3g01520 PE=1 SV=2	1.635	Up	0.0132208	2.107	Up	0.0036165	1.657	Up	0.00185786	1.286	--	0.179343	GO:0006950 response to stress; GO:0050896 response to stimulus;	--	--	--	--	--	--
F01_cb6976_c16/f1p0/1900	PREDICTED: FRIGIDA-like protein 4b OS=Arabidopsis thaliana GN=FRL4B PE=1 SV=1	0.53	Down	0.0035757	0.729	--	0.35786	1.334	--	0.88016	0.97	--	0.81862	--	--	--	--	--	--	--
F01_cb8112_c2/f1p3/1856	PREDICTED: RanBP2-type zinc finger protein At1g67325 OS=Arabidopsis thaliana GN=At1g67325 PE=1 SV=1	0.645	Down	0.042419	0.979	--	0.76268	1.275	--	0.6251	0.84	--	0.36566	--	--	GO:0043169 cation binding; GO:0046872 metal ion binding; GO:0008270 zinc ion binding; GO:0046914 transition metal ion binding; GO:0005488 binding; GO:0043167 ion binding;	--	--	R	Conserved Zn-finger protein
F01_cb7486_c1/f1p1/1989	PREDICTED: COP9 signalosome complex subunit 1 OS=Arabidopsis thaliana GN=CSN1 PE=1 SV=2	0.629	Down	0.030125	0.859	--	0.043662	1.857	Up	0.0083431	1.361	--	0.059523	--	--	GO:0005515 protein binding; GO:0005488 binding;	--	--	OT	COP9 signalosome, subunit CSN1
F01_cb14975_c0/f1p0/1466	"""PREDICTED: PsbP domain-containing protein 1, chloroplastic OS=Arabidopsis thaliana GN=PPD1 PE=1 SV=1"""	1.339	Up	0.0152161	1.275	--	0.74008	0.787	--	0.40414	0.826	--	0.32956	GO:0008152 metabolic process; GO:0044237 cellular metabolic process; GO:0009987 cellular process; GO:0015979 photosynthesis;	GO:0016020 membrane; GO:0009523 photosystem II; GO:0019898 extrinsic component of membrane; GO:0098796 membrane protein complex; GO:0009654 photosystem II oxygen evolving complex; GO:0042651 thylakoid membrane; GO:0032991 macromolecular complex; GO:0044424 intracellular part; GO:0005623 cell; GO:0034357 photosynthetic membrane; GO:0009521 photosystem; GO:1902494 catalytic complex; GO:0044425 memb…	GO:0043169 cation binding; GO:0046872 metal ion binding; GO:0005509 calcium ion binding; GO:0005488 binding; GO:0043167 ion binding;	--	--	--	--
F02_cb8201_c660/f1p0/1940	PREDICTED: Cytochrome P450 750A1 OS=Pinus taeda GN=CYP750A1 PE=2 SV=1	1.313	Up	0.0191828	--	--	--	--	--	--	--	--	--	GO:0044699 single-organism process; GO:0008152 metabolic process; GO:0055114 oxidation-reduction process; GO:0044710 single-organism metabolic process;	--	GO:0097159 organic cyclic compound binding; GO:1901363 heterocyclic compound binding; GO:0020037 heme binding; GO:0005506 iron ion binding; GO:0046914 transition metal ion binding; GO:0003824 catalytic activity; GO:0005488 binding; GO:0043167 ion binding; GO:0043169 cation binding; GO:0046872 metal ion binding; GO:0016705 oxidoreductase activity, acting on paired donors, with incorporation or red…	--	--	Q	Cytochrome P450 CYP2 subfamily
F02_cb7114_c3/f8p0/1985	"""PREDICTED: alanine--glyoxylate aminotransferase 2 homolog 1, mitochondrial [Nelumbo nucifera]"""	4.27	Up	0.0158414	5.872	Up	0.0057368	1.704	Up	0.0187553	1.239	--	0.31854	--	--	GO:0097159 organic cyclic compound binding; GO:1901363 heterocyclic compound binding; GO:0016769 transferase activity, transferring nitrogenous groups; GO:0003824 catalytic activity; GO:0005488 binding; GO:0043167 ion binding; GO:0043168 anion binding; GO:0008483 transaminase activity; GO:0016740 transferase activity; GO:0048037 cofactor binding; GO:0030170 pyridoxal phosphate binding;	atr:s00010p00232210; AMTR_s00010p00232210; hypothetical protein; K00827 alanine-glyoxylate transaminase / (R)-3-amino-2-methylpropionate-pyruvate transaminase [EC:2.6.1.44 2.6.1.40] (A)	ko00250 Alanine, aspartate and glutamate metabolism; ko00260 Glycine, serine and threonine metabolism;	E	Alanine-glyoxylate aminotransferase AGT2
F01_cb10656_c3/f1p0/1646	PREDICTED: Aquaporin TIP1-1 OS=Arabidopsis thaliana GN=TIP1-1 PE=1 SV=1	1.262	Up	0.0152586	1.155	--	0.197644	0.862	--	0.136261	0.942	--	0.43276	GO:0006810 transport; GO:0051179 localization; GO:0051234 establishment of localization;	GO:0016020 membrane;	GO:0005215 transporter activity;	--	--	G	Aquaporin (major intrinsic protein family)
F02_cb8346_c1/f1p0/1825	PREDICTED: Negative regulator of systemic acquired resistance SNI1 OS=Arabidopsis thaliana GN=SNI1 PE=1 SV=1	0.402	Down	0.012665	0.999	--	0.98762	2.342	Up	5.5076e-05	0.944	--	0.91646	--	--	--	--	--	--	--
F02_cb12091_c1/f4p0/1229	PREDICTED: Vesicle transport v-SNARE 13 OS=Arabidopsis thaliana GN=VTI13 PE=2 SV=1	2.223	Up	0.0040214	1.322	--	0.217	0.623	Down	0.028743	1.047	--	0.66172	GO:0045184 establishment of protein localization; GO:0006810 transport; GO:0046907 intracellular transport; GO:0070727 cellular macromolecule localization; GO:0051649 establishment of localization in cell; GO:0016192 vesicle-mediated transport; GO:0006886 intracellular protein transport; GO:0071702 organic substance transport; GO:0008104 protein localization; GO:0033036 macromolecule localization…	GO:0043226 organelle; GO:0043231 intracellular membrane-bounded organelle; GO:0043229 intracellular organelle; GO:0016020 membrane; GO:0044464 cell part; GO:0005622 intracellular; GO:0005737 cytoplasm; GO:0012505 endomembrane system; GO:0044424 intracellular part; GO:0005623 cell; GO:0043227 membrane-bounded organelle; GO:0005794 Golgi apparatus; GO:0044444 cytoplasmic part;	GO:0005484 SNAP receptor activity; GO:0005515 protein binding; GO:0005488 binding;	atr:s00044p00114380; AMTR_s00044p00114380; hypothetical protein; K08493 vesicle transport through interaction with t-SNAREs 1 (A)	ko04130 SNARE interactions in vesicular transport;	U	V-SNARE
F01_cb9247_c0/f1p1/1643	"""PREDICTED: Probable L-ascorbate peroxidase 8, chloroplastic OS=Oryza sativa subsp. japonica GN=APX8 PE=2 SV=2"""	0.389	Down	0.031621	0.559	Down	0.0138401	3.684	Up	0.00125757	2.561	--	0.063265	GO:0008152 metabolic process; GO:0006950 response to stress; GO:0055114 oxidation-reduction process; GO:0044710 single-organism metabolic process; GO:0006979 response to oxidative stress; GO:0044699 single-organism process; GO:0050896 response to stimulus;	--	GO:0097159 organic cyclic compound binding; GO:1901363 heterocyclic compound binding; GO:0020037 heme binding; GO:0003824 catalytic activity; GO:0005488 binding; GO:0016209 antioxidant activity; GO:0004601 peroxidase activity; GO:0046906 tetrapyrrole binding; GO:0016491 oxidoreductase activity; GO:0016684 oxidoreductase activity, acting on peroxide as acceptor;	fve:101294792; L-ascorbate peroxidase 3, peroxisomal-like; K00434 L-ascorbate peroxidase [EC:1.11.1.11] (A)	ko00480 Glutathione metabolism; ko00053 Ascorbate and aldarate metabolism;	--	--
F02_cb13483_c0/f2p0/1088	unknown [Picea sitchensis]	2.244	Up	0.023101	3.237	Up	1.9782e-06	0.688	--	0.089184	0.477	--	0.077422	--	--	--	--	--	--	--
F01_cb10620_c4/f4p0/1340	PREDICTED: Peroxisomal fatty acid beta-oxidation multifunctional protein AIM1 OS=Arabidopsis thaliana GN=AIM1 PE=1 SV=1	0.637	Down	0.02592	0.626	Down	0.048335	1.395	--	0.057543	1.419	--	0.108664	GO:0055114 oxidation-reduction process; GO:0044281 small molecule metabolic process; GO:0044763 single-organism cellular process; GO:0044699 single-organism process; GO:0044255 cellular lipid metabolic process; GO:0006631 fatty acid metabolic process; GO:0044238 primary metabolic process; GO:0044237 cellular metabolic process; GO:0071704 organic substance metabolic process; GO:0008152 metabolic p…	--	GO:1901265 nucleoside phosphate binding; GO:0043167 ion binding; GO:0070403 NAD+ binding; GO:0000166 nucleotide binding; GO:0048037 cofactor binding; GO:0016491 oxidoreductase activity; GO:1901363 heterocyclic compound binding; GO:0097159 organic cyclic compound binding; GO:0016614 oxidoreductase activity, acting on CH-OH group of donors; GO:0016616 oxidoreductase activity, acting on the CH-OH gr…	pmum:103326052; probable 3-hydroxyacyl-CoA dehydrogenase B0272.3; K00074 3-hydroxybutyryl-CoA dehydrogenase [EC:1.1.1.157] (A)	ko00360 Phenylalanine metabolism; ko00650 Butanoate metabolism;	I	3-hydroxyacyl-CoA dehydrogenase
F02_cb13033_c1/f1p0/847	unknown [Picea sitchensis]	2.246	Up	0.0182231	2.227	Up	0.0072965	0.661	Down	0.0101238	0.666	--	0.21962	--	--	--	--	--	--	--
F02_cb15269_c0/f1p0/1701	Putative arsenical pump-driving ATPase [Morus notabilis]	1.375	Up	0.0041834	1.032	--	0.4241	0.884	--	0.071156	1.178	--	0.0161029	--	--	GO:0005524 ATP binding; GO:1901265 nucleoside phosphate binding; GO:0001882 nucleoside binding; GO:0043167 ion binding; GO:0016817 hydrolase activity, acting on acid anhydrides; GO:0016787 hydrolase activity; GO:0000166 nucleotide binding; GO:0017111 nucleoside-triphosphatase activity; GO:0016887 ATPase activity; GO:0097159 organic cyclic compound binding; GO:1901363 heterocyclic compound binding…	--	--	P	Putative arsenite-translocating ATPase
F01_cb6725_c4/f1p0/2130	BnaC04g38350D [Brassica napus]	0.489	Down	0.020042	0.682	--	0.25868	1.233	--	0.72342	0.884	--	0.62224	--	--	--	--	--	--	--
F01_cb14283_c1/f1p0/711	PREDICTED: STS14 protein OS=Solanum tuberosum GN=STS14 PE=2 SV=1	3.077	Up	0.030264	--	--	--	--	--	--	--	--	--	--	--	--	--	--	S	Defense-related protein containing SCP domain
F02_cb11717_c1/f2p0/1053	PREDICTED: Proteasome subunit beta type-6 OS=Arabidopsis thaliana GN=PBA1 PE=1 SV=2	5.522	Up	0.0020024	8.697	Up	2.2888e-05	0.463	Down	0.0119362	0.294	Down	0.0035964	GO:0051603 proteolysis involved in cellular protein catabolic process; GO:0044265 cellular macromolecule catabolic process; GO:0044257 cellular protein catabolic process; GO:0044267 cellular protein metabolic process; GO:0044238 primary metabolic process; GO:0044237 cellular metabolic process; GO:0071704 organic substance metabolic process; GO:1901575 organic substance catabolic process; GO:00081…	GO:1902494 catalytic complex; GO:0000502 proteasome complex; GO:0044464 cell part; GO:0005622 intracellular; GO:0005839 proteasome core complex; GO:0032991 macromolecular complex; GO:0044424 intracellular part; GO:1905368 peptidase complex; GO:0005623 cell; GO:0043234 protein complex; GO:1905369 endopeptidase complex;	GO:0004175 endopeptidase activity; GO:0004298 threonine-type endopeptidase activity; GO:0008233 peptidase activity; GO:0070003 threonine-type peptidase activity; GO:0003824 catalytic activity; GO:0070011 peptidase activity, acting on L-amino acid peptides; GO:0016787 hydrolase activity;	tcc:TCM_036772; N-terminal nucleophile aminohydrolases (Ntn hydrolases) superfamily protein isoform 1; K02738 20S proteasome subunit beta 1 [EC:3.4.25.1] (A)	ko03050 Proteasome;	O	20S proteasome, regulatory subunit beta type PSMB6/PSMB9/PRE3
F02_cb13781_c3/f1p0/1338	"""PREDICTED: prohibitin-1, mitochondrial-like isoform 1 [Cucumis sativus]"""	1.75	Up	0.0057989	1.797	Up	0.025879	0.927	--	0.6315	0.903	--	0.39668	--	GO:0016020 membrane;	--	--	--	O	Prohibitin
F01_cb15742_c0/f3p0/655	unknown [Picea sitchensis]	1.74	Up	0.030683	1.383	--	0.169976	0.964	--	0.86436	1.213	--	0.52788	--	--	--	--	--	--	--
F01_cb1522_c17/f1p0/3167	PREDICTED: phospholipase D alpha 1-like [Phoenix dactylifera]	0.684	Down	0.033556	0.732	--	0.31122	0.913	--	0.3275	0.853	--	0.47918	GO:0046470 phosphatidylcholine metabolic process; GO:0046486 glycerolipid metabolic process; GO:0044763 single-organism cellular process; GO:0097164 ammonium ion metabolic process; GO:0006807 nitrogen compound metabolic process; GO:0044699 single-organism process; GO:0044255 cellular lipid metabolic process; GO:0044238 primary metabolic process; GO:0044237 cellular metabolic process; GO:0006796 p…	GO:0016020 membrane;	GO:0003824 catalytic activity; GO:0042578 phosphoric ester hydrolase activity; GO:0005488 binding; GO:0043167 ion binding; GO:0016788 hydrolase activity, acting on ester bonds; GO:0004630 phospholipase D activity; GO:0004620 phospholipase activity; GO:0043169 cation binding; GO:0046872 metal ion binding; GO:0005515 protein binding; GO:0008081 phosphoric diester hydrolase activity; GO:0016787 hydr…	atr:s00078p00051300; AMTR_s00078p00051300; hypothetical protein; K01115 phospholipase D1/2 [EC:3.1.4.4] (A)	ko00564 Glycerophospholipid metabolism; ko00565 Ether lipid metabolism; ko04144 Endocytosis;	I	Phospholipase D1
F02_cb13843_c1/f1p0/1640	"""PREDICTED: Superoxide dismutase [Fe] 3, chloroplastic OS=Arabidopsis thaliana GN=FSD3 PE=1 SV=1"""	2.086	Up	0.0120995	8.313	Up	0.00035718	1.065	--	0.45766	0.267	Down	0.0147446	GO:0006801 superoxide metabolic process; GO:0008152 metabolic process; GO:0072593 reactive oxygen species metabolic process; GO:0055114 oxidation-reduction process; GO:0044710 single-organism metabolic process; GO:0044699 single-organism process; GO:0009987 cellular process; GO:0044237 cellular metabolic process;	--	GO:0004784 superoxide dismutase activity; GO:0003824 catalytic activity; GO:0016721 oxidoreductase activity, acting on superoxide radicals as acceptor; GO:0005488 binding; GO:0043167 ion binding; GO:0016209 antioxidant activity; GO:0043169 cation binding; GO:0046872 metal ion binding; GO:0016491 oxidoreductase activity;	--	--	P	Manganese superoxide dismutase
F01_cb8007_c11/f1p1/1732	PREDICTED: Abscisic acid receptor PYL8 OS=Arabidopsis thaliana GN=PYL8 PE=1 SV=1	0.54	Down	0.020357	--	--	--	--	--	--	--	--	--	--	--	--	tcc:TCM_016450; Regulatory components of ABA receptor 3; K14496 abscisic acid receptor PYR/PYL family (A)	ko04075 Plant hormone signal transduction;	--	--
F01_cb14034_c6/f1p0/791	PREDICTED: 40S ribosomal protein S20-2 OS=Arabidopsis thaliana GN=RPS20B PE=2 SV=1	0.497	Down	0.0151639	0.889	--	0.354	1.39	--	0.104784	0.776	--	0.20154	GO:0006518 peptide metabolic process; GO:0043043 peptide biosynthetic process; GO:0044267 cellular protein metabolic process; GO:0006807 nitrogen compound metabolic process; GO:0009058 biosynthetic process; GO:0043603 cellular amide metabolic process; GO:0044238 primary metabolic process; GO:1901566 organonitrogen compound biosynthetic process; GO:1901576 organic substance biosynthetic process; G…	GO:0005840 ribosome; GO:0043229 intracellular organelle; GO:0043232 intracellular non-membrane-bounded organelle; GO:0015935 small ribosomal subunit; GO:0044446 intracellular organelle part; GO:0005737 cytoplasm; GO:0032991 macromolecular complex; GO:0044424 intracellular part; GO:0005623 cell; GO:0044422 organelle part; GO:0043228 non-membrane-bounded organelle; GO:0043226 organelle; GO:0044391 …	GO:0097159 organic cyclic compound binding; GO:1901363 heterocyclic compound binding; GO:0003723 RNA binding; GO:0005488 binding; GO:0003676 nucleic acid binding; GO:0005198 structural molecule activity; GO:0003735 structural constituent of ribosome;	atr:s00024p00105050; AMTR_s00024p00105050; hypothetical protein; K02969 small subunit ribosomal protein S20e (A)	ko03010 Ribosome;	J	40S ribosomal protein S20
F01_cb8765_c2/f3p1/1284	PREDICTED: Ras-related protein RABH1e OS=Arabidopsis thaliana GN=RABH1E PE=2 SV=1	1.727	Up	0.048445	1.306	--	0.37018	0.513	Down	0.04548	0.678	--	0.100385	GO:0050794 regulation of cellular process; GO:0044700 single organism signaling; GO:0051716 cellular response to stimulus; GO:0007165 signal transduction; GO:0050789 regulation of biological process; GO:0007154 cell communication; GO:0035556 intracellular signal transduction; GO:0044699 single-organism process; GO:0007264 small GTPase mediated signal transduction; GO:0023052 signaling; GO:0050896…	--	GO:1901265 nucleoside phosphate binding; GO:0001882 nucleoside binding; GO:0043167 ion binding; GO:0000166 nucleotide binding; GO:0097159 organic cyclic compound binding; GO:1901363 heterocyclic compound binding; GO:0032549 ribonucleoside binding; GO:0097367 carbohydrate derivative binding; GO:0032553 ribonucleotide binding; GO:0005488 binding; GO:0032550 purine ribonucleoside binding; GO:0043168…	--	--	U	GTPase Rab6/YPT6/Ryh1, small G protein superfamily
F01_cb7687_c5/f1p0/1562	unknown [Picea sitchensis]	0.511	Down	0.0157008	--	--	--	--	--	--	--	--	--	--	--	--	--	--	S	Uncharacterized conserved protein
F01_cb10424_c1/f1p0/807	unknown [Picea sitchensis]	0.295	Down	0.0020163	0.359	Down	0.022037	0.406	Down	0.0111192	0.333	Down	0.0106826	--	--	--	--	--	--	--
F01_cb11993_c2/f1p0/1124	PREDICTED: Uncharacterized protein At4g28440 OS=Arabidopsis thaliana GN=At4g28440 PE=1 SV=1	0.68	Down	0.029122	0.568	Down	0.038221	0.596	--	0.052404	0.713	Down	0.035057	--	--	--	atr:s00058p00174410; AMTR_s00058p00174410; hypothetical protein; K07466 replication factor A1 (A)	ko03430 Mismatch repair; ko03440 Homologous recombination; ko03030 DNA replication; ko03420 Nucleotide excision repair;	--	--
F01_cb14552_c0/f2p0/960	unknown [Picea sitchensis]	0.669	Down	0.0094987	0.823	--	0.056017	1.232	--	0.091061	1.002	--	0.939	--	--	--	--	--	--	--
F02_cb12673_c7/f1p0/1157	PREDICTED: GEM-like protein 1 OS=Arabidopsis thaliana GN=FIP1 PE=1 SV=1	1.449	Up	0.036498	1.405	Up	0.022684	1.049	--	0.70776	1.082	--	0.45008	--	--	--	--	--	--	--
F01_cb11875_c9/f1p0/743	PREDICTED: Small nuclear ribonucleoprotein SmD3b OS=Arabidopsis thaliana GN=SMD3B PE=2 SV=1	1.724	Up	0.0073369	1.628	Up	0.00061597	1.11	--	0.140944	1.175	--	0.185538	GO:0044085 cellular component biogenesis; GO:0016043 cellular component organization; GO:0022613 ribonucleoprotein complex biogenesis; GO:0022618 ribonucleoprotein complex assembly; GO:0006725 cellular aromatic compound metabolic process; GO:0044237 cellular metabolic process; GO:0071704 organic substance metabolic process; GO:0000398 mRNA splicing, via spliceosome; GO:0008152 metabolic process; …	GO:0043229 intracellular organelle; GO:0044446 intracellular organelle part; GO:0032991 macromolecular complex; GO:0044424 intracellular part; GO:0005681 spliceosomal complex; GO:0005623 cell; GO:0044422 organelle part; GO:0043226 organelle; GO:0043231 intracellular membrane-bounded organelle; GO:0005634 nucleus; GO:0044464 cell part; GO:0005622 intracellular; GO:1990904 ribonucleoprotein complex…	--	rcu:RCOM_1600990; small nuclear ribonucleoprotein, putative; K11088 small nuclear ribonucleoprotein D3 (A)	ko03040 Spliceosome;	A	Small nuclear ribonucleoprotein Sm D3
F02_cb1672_c26/f1p0/1475	PREDICTED: Leucine-rich repeat receptor-like serine/threonine/tyrosine-protein kinase SOBIR1 OS=Arabidopsis thaliana GN=SOBIR1 PE=1 SV=1	1.64	Up	0.0186593	1.126	--	0.70588	1.404	--	0.2405	2.045	Up	0.004836	GO:0016310 phosphorylation; GO:0044267 cellular protein metabolic process; GO:0044238 primary metabolic process; GO:0044237 cellular metabolic process; GO:0006796 phosphate-containing compound metabolic process; GO:0071704 organic substance metabolic process; GO:0008152 metabolic process; GO:0006468 protein phosphorylation; GO:0006793 phosphorus metabolic process; GO:0044260 cellular macromolecul…	--	GO:0005524 ATP binding; GO:1901265 nucleoside phosphate binding; GO:0016773 phosphotransferase activity, alcohol group as acceptor; GO:0001882 nucleoside binding; GO:0043167 ion binding; GO:0004672 protein kinase activity; GO:0000166 nucleotide binding; GO:0097159 organic cyclic compound binding; GO:1901363 heterocyclic compound binding; GO:0032549 ribonucleoside binding; GO:0097367 carbohydrate …	--	--	R	FOG: Leucine rich repeat
F02_cb7869_c16/f1p1/1984	PREDICTED: 26S protease regulatory subunit 6A homolog OS=Brassica campestris GN=TBP1 PE=2 SV=1	0.702	Down	0.024224	0.528	--	0.186703	0.41	--	0.120883	0.545	Down	0.0049973	GO:1901575 organic substance catabolic process; GO:0008152 metabolic process; GO:0030163 protein catabolic process; GO:0009057 macromolecule catabolic process; GO:0043170 macromolecule metabolic process; GO:0019538 protein metabolic process; GO:0044238 primary metabolic process; GO:0009056 catabolic process; GO:0071704 organic substance metabolic process;	GO:0044424 intracellular part; GO:0005623 cell; GO:0044464 cell part; GO:0005622 intracellular; GO:0005737 cytoplasm;	GO:0005524 ATP binding; GO:1901265 nucleoside phosphate binding; GO:0001882 nucleoside binding; GO:0043167 ion binding; GO:0016787 hydrolase activity; GO:0000166 nucleotide binding; GO:0097159 organic cyclic compound binding; GO:1901363 heterocyclic compound binding; GO:0032549 ribonucleoside binding; GO:0097367 carbohydrate derivative binding; GO:0003824 catalytic activity; GO:0032553 ribonucleo…	pper:PRUPE_ppa006192mg; hypothetical protein; K03065 26S proteasome regulatory subunit T5 (A)	ko03050 Proteasome;	O	26S proteasome regulatory complex, ATPase RPT5
F02_cb14490_c1/f1p0/1107	lambda class glutathione S-transferase [Pinus tabuliformis]	11.418	Up	0.0031415	15.08	Up	0.00015733	1.148	--	0.57206	0.869	--	0.9619	--	--	GO:0005515 protein binding; GO:0005488 binding;	gmx:547597; In2-1 protein; K00799 glutathione S-transferase [EC:2.5.1.18] (A)	ko00480 Glutathione metabolism;	O	Glutathione S-transferase
F02_cb12823_c4/f1p2/1539	PREDICTED: Proteasome subunit alpha type-7 OS=Cicer arietinum GN=PAD1 PE=2 SV=1	1.256	Up	0.043002	--	--	--	--	--	--	--	--	--	GO:0043632 modification-dependent macromolecule catabolic process; GO:0051603 proteolysis involved in cellular protein catabolic process; GO:0044265 cellular macromolecule catabolic process; GO:0044257 cellular protein catabolic process; GO:0019941 modification-dependent protein catabolic process; GO:0044267 cellular protein metabolic process; GO:0006511 ubiquitin-dependent protein catabolic proc…	GO:0019773 proteasome core complex, alpha-subunit complex; GO:1902494 catalytic complex; GO:0000502 proteasome complex; GO:0044464 cell part; GO:0005622 intracellular; GO:0005839 proteasome core complex; GO:0032991 macromolecular complex; GO:0044424 intracellular part; GO:1905368 peptidase complex; GO:0005623 cell; GO:0043234 protein complex; GO:1905369 endopeptidase complex;	GO:0004175 endopeptidase activity; GO:0004298 threonine-type endopeptidase activity; GO:0008233 peptidase activity; GO:0070003 threonine-type peptidase activity; GO:0003824 catalytic activity; GO:0070011 peptidase activity, acting on L-amino acid peptides; GO:0016787 hydrolase activity;	pper:PRUPE_ppa010444mg; hypothetical protein; K02731 20S proteasome subunit alpha 4 [EC:3.4.25.1] (A)	ko03050 Proteasome;	O	20S proteasome, regulatory subunit alpha type PSMA7/PRE6
F01_cb5466_c1/f2p0/1662	PREDICTED: Purple acid phosphatase 22 OS=Arabidopsis thaliana GN=PAP22 PE=2 SV=1	0.517	Down	0.0108755	0.68	--	0.24512	0.304	Down	0.0044791	0.232	Down	0.0027367	--	--	GO:0003993 acid phosphatase activity; GO:0042578 phosphoric ester hydrolase activity; GO:0003824 catalytic activity; GO:0016791 phosphatase activity; GO:0005488 binding; GO:0016788 hydrolase activity, acting on ester bonds; GO:0043167 ion binding; GO:0043169 cation binding; GO:0046872 metal ion binding; GO:0016787 hydrolase activity; GO:0005515 protein binding;	--	--	G	Purple acid phosphatase
F01_cb9947_c35/f1p0/1656	PREDICTED: Ricin B-like lectin R40G2 OS=Oryza sativa subsp. japonica GN=R40G2 PE=2 SV=1	0.188	Down	0.00041988	--	--	--	--	--	--	--	--	--	--	--	--	--	--	--	--
F02_cb5827_c1/f1p0/2380	PREDICTED: hexokinase-3-like [Nelumbo nucifera]	0.677	Down	0.031621	1.433	Up	0.0182445	3.933	Up	0.00055803	1.859	Up	0.00085656	GO:0006757 ATP generation from ADP; GO:0009116 nucleoside metabolic process; GO:0042278 purine nucleoside metabolic process; GO:0065008 regulation of biological quality; GO:0006165 nucleoside diphosphate phosphorylation; GO:0046031 ADP metabolic process; GO:0019362 pyridine nucleotide metabolic process; GO:0006096 glycolytic process; GO:0009167 purine ribonucleoside monophosphate metabolic proces…	--	GO:0005524 ATP binding; GO:1901265 nucleoside phosphate binding; GO:0016773 phosphotransferase activity, alcohol group as acceptor; GO:0005536 glucose binding; GO:0001882 nucleoside binding; GO:0043167 ion binding; GO:0048029 monosaccharide binding; GO:0000166 nucleotide binding; GO:0097159 organic cyclic compound binding; GO:1901363 heterocyclic compound binding; GO:0032549 ribonucleoside bindin…	cic:CICLE_v10014962mg; hypothetical protein; K00844 hexokinase [EC:2.7.1.1] (A)	ko00051 Fructose and mannose metabolism; ko00010 Glycolysis / Gluconeogenesis; ko01200 Carbon metabolism; ko00500 Starch and sucrose metabolism; ko00052 Galactose metabolism; ko00520 Amino sugar and nucleotide sugar metabolism;	G	Hexokinase
F02_cb6168_c11/f3p0/2317	unknown [Picea sitchensis]	0.329	Down	0.0119041	--	--	--	--	--	--	--	--	--	GO:0006396 RNA processing; GO:0034470 ncRNA processing; GO:0006725 cellular aromatic compound metabolic process; GO:1901360 organic cyclic compound metabolic process; GO:0006807 nitrogen compound metabolic process; GO:0044238 primary metabolic process; GO:0044237 cellular metabolic process; GO:0071704 organic substance metabolic process; GO:0016070 RNA metabolic process; GO:0008152 metabolic proc…	--	GO:0003824 catalytic activity; GO:0016740 transferase activity; GO:0016772 transferase activity, transferring phosphorus-containing groups;	--	--	J	RNA:NAD 2'-phosphotransferase TPT1
F02_cb14488_c0/f1p0/1425	class III secretory peroxidase [Ginkgo biloba]	0.323	Down	0.0098829	--	--	--	--	--	--	--	--	--	GO:0008152 metabolic process; GO:0042743 hydrogen peroxide metabolic process; GO:0006950 response to stress; GO:0072593 reactive oxygen species metabolic process; GO:0055114 oxidation-reduction process; GO:0044710 single-organism metabolic process; GO:0006979 response to oxidative stress; GO:0044699 single-organism process; GO:0044248 cellular catabolic process; GO:0050896 response to stimulus; G…	--	GO:0097159 organic cyclic compound binding; GO:1901363 heterocyclic compound binding; GO:0020037 heme binding; GO:0003824 catalytic activity; GO:0005488 binding; GO:0016209 antioxidant activity; GO:0004601 peroxidase activity; GO:0046906 tetrapyrrole binding; GO:0016491 oxidoreductase activity; GO:0016684 oxidoreductase activity, acting on peroxide as acceptor;	pda:103703770; peroxidase 72-like; K00430 peroxidase [EC:1.11.1.7] (A)	ko00940 Phenylpropanoid biosynthesis; ko00360 Phenylalanine metabolism;	--	--
F02_cb13882_c0/f2p0/1502	PREDICTED: Replication factor C subunit 4 OS=Oryza sativa subsp. japonica GN=RFC4 PE=2 SV=2	0.746	Down	0.0190046	1.215	Up	0.0184165	1.467	Up	0.0106219	0.901	--	0.046681	GO:0006260 DNA replication; GO:0006725 cellular aromatic compound metabolic process; GO:0006259 DNA metabolic process; GO:1901360 organic cyclic compound metabolic process; GO:0006807 nitrogen compound metabolic process; GO:0009058 biosynthetic process; GO:0044238 primary metabolic process; GO:1901576 organic substance biosynthetic process; GO:0044237 cellular metabolic process; GO:0044249 cellul…	--	GO:0003677 DNA binding; GO:0005524 ATP binding; GO:1901265 nucleoside phosphate binding; GO:0001882 nucleoside binding; GO:0043167 ion binding; GO:0000166 nucleotide binding; GO:1901363 heterocyclic compound binding; GO:0097159 organic cyclic compound binding; GO:0032549 ribonucleoside binding; GO:0097367 carbohydrate derivative binding; GO:0032553 ribonucleotide binding; GO:0005488 binding; GO:0…	cam:101510692; replication factor C subunit 2-like; K10755 replication factor C subunit 2/4 (A)	ko03430 Mismatch repair; ko03030 DNA replication; ko03420 Nucleotide excision repair;	L	Replication factor C, subunit RFC2
F02_cb949_c12/f1p0/2065	PREDICTED: uncharacterized protein LOC103713631 [Phoenix dactylifera]	0.606	Down	0.034421	1.039	--	0.66186	1.746	Up	0.0028199	1.018	--	0.83244	--	--	--	--	--	--	--
F01_cb13318_c3/f1p0/698	unknown [Picea sitchensis]	1.794	Up	0.025663	1.672	Up	0.0185197	0.737	--	0.055803	0.791	--	0.3077	--	--	--	--	--	--	--
F01_cb12694_c10/f1p0/954	unknown [Picea sitchensis]	2.31	Up	5.6391e-05	3.163	Up	0.003005	1.22	--	0.38044	0.891	--	0.076036	--	--	--	gmx:547597; In2-1 protein; K00799 glutathione S-transferase [EC:2.5.1.18] (A)	ko00480 Glutathione metabolism;	--	--
F01_cb6583_c15/f2p1/2123	unknown [Picea sitchensis]	0.184	Down	0.046119	0.714	Down	0.0039032	1.848	Up	0.00065611	0.477	--	0.21954	--	--	--	--	--	--	--
F02_cb12617_c1/f1p0/1091	"""PREDICTED: 5-formyltetrahydrofolate cyclo-ligase, mitochondrial OS=Arabidopsis thaliana GN=5FCL PE=1 SV=1"""	1.938	Up	0.0031216	1.348	--	0.17234	0.925	--	0.56944	1.329	--	0.069538	--	--	--	pper:PRUPE_ppa009377mg; hypothetical protein; K01934 5-formyltetrahydrofolate cyclo-ligase [EC:6.3.3.2] (A)	ko00670 One carbon pool by folate;	H	5-formyltetrahydrofolate cyclo-ligase
F01_cb8663_c54/f1p5/1702	"""PREDICTED: ADP,ATP carrier protein 3, mitochondrial OS=Arabidopsis thaliana GN=AAC3 PE=1 SV=1"""	1.741	Up	0.022318	1.436	Up	0.03948	1.223	--	0.149161	1.482	--	0.067721	GO:0006810 transport; GO:0055085 transmembrane transport; GO:0051179 localization; GO:0051234 establishment of localization;	GO:0016020 membrane; GO:0043229 intracellular organelle; GO:0044429 mitochondrial part; GO:0031090 organelle membrane; GO:0031967 organelle envelope; GO:0044446 intracellular organelle part; GO:0005737 cytoplasm; GO:0044424 intracellular part; GO:0005623 cell; GO:0044422 organelle part; GO:0005739 mitochondrion; GO:0005740 mitochondrial envelope; GO:0043231 intracellular membrane-bounded organell…	GO:0005215 transporter activity;	--	--	C	Mitochondrial ADP/ATP carrier proteins
F01_cb735_c3/f1p0/3393	PREDICTED: uncharacterized protein LOC104606505 [Nelumbo nucifera]	1.337	Up	0.031598	1.121	--	0.32228	0.705	Down	0.0138235	0.841	--	0.185599	--	--	GO:0005515 protein binding; GO:0005488 binding;	--	--	ODR	Myosin assembly protein/sexual cycle protein and related proteins
F01_cb8202_c6/f4p0/1836	unknown [Picea sitchensis]	0.538	Down	0.034221	0.254	Down	0.0136793	0.579	--	0.142179	1.225	--	0.26312	--	--	GO:0016787 hydrolase activity; GO:0042578 phosphoric ester hydrolase activity; GO:0003824 catalytic activity; GO:0008252 nucleotidase activity; GO:0016791 phosphatase activity; GO:0016788 hydrolase activity, acting on ester bonds;	atr:s00036p00106140; AMTR_s00036p00106140; hypothetical protein; K03787 5'-nucleotidase [EC:3.1.3.5] (A)	ko00230 Purine metabolism; ko00240 Pyrimidine metabolism; ko00760 Nicotinate and nicotinamide metabolism;	--	--
F01_cb10840_c2/f1p0/1358	PREDICTED: GEM-like protein 5 OS=Arabidopsis thaliana GN=At5g13200 PE=1 SV=1	0.385	Down	0.0032955	0.803	--	0.24808	1.526	Up	0.0161973	0.732	--	0.152661	--	--	--	--	--	--	--
F02_cb12313_c5/f1p0/874	glycine decarboxylase complex H-protein [Pinus pinaster]	0.402	Down	0.022602	0.483	--	0.074342	1.155	--	0.68294	0.962	--	0.98566	--	--	--	tcc:TCM_015756; Single hybrid motif superfamily protein; K02437 glycine cleavage system H protein (A)	ko00260 Glycine, serine and threonine metabolism; ko00630 Glyoxylate and dicarboxylate metabolism;	--	--
F02_cb6874_c14/f1p0/2068	hypothetical protein PRUPE_ppa002945mg [Prunus persica]	1.524	Up	0.00087527	1.34	--	0.069339	1.038	--	0.78914	1.18	--	0.101182	GO:0008152 metabolic process; GO:0005975 carbohydrate metabolic process; GO:0044238 primary metabolic process; GO:0071704 organic substance metabolic process;	--	GO:0016853 isomerase activity; GO:0003824 catalytic activity; GO:0016866 intramolecular transferase activity; GO:0016868 intramolecular transferase activity, phosphotransferases;	--	--	G	Phosphoglucomutase/phosphomannomutase
F01_cb15405_c0/f1p0/501	unknown [Picea sitchensis]	0.463	Down	0.0055196	1.63	Up	0.042258	2.227	Up	0.0047576	0.632	--	0.050858	--	--	--	--	--	--	--
F02_cb3339_c16/f1p0/2761	PREDICTED: probable indole-3-acetic acid-amido synthetase GH3.5 [Elaeis guineensis]	0.382	Down	0.0136609	0.884	--	0.39406	4.496	Up	0.000119696	1.943	Up	0.040115	--	--	--	mus:103981532; probable indole-3-acetic acid-amido synthetase GH3.5; K14506 jasmonic acid-amino synthetase (A)	ko04075 Plant hormone signal transduction;	--	--
F02_cb16000_c1/f1p0/548	embryo-abundant protein [Pinus pinaster]	0.177	Down	0.00101677	0.464	--	0.182022	0.151	Down	0.0037796	0.058	Down	0.00152085	--	--	--	--	--	--	--
F01_cb11060_c5/f1p0/644	PREDICTED: Cystatin-1 OS=Zea mays GN=RAMDAZC7 PE=2 SV=1	1.819	Up	0.023096	1.59	--	0.141218	1.265	--	0.47568	1.447	Up	0.04132	--	--	GO:0061135 endopeptidase regulator activity; GO:0004857 enzyme inhibitor activity; GO:0098772 molecular function regulator; GO:0030234 enzyme regulator activity; GO:0004866 endopeptidase inhibitor activity; GO:0004869 cysteine-type endopeptidase inhibitor activity; GO:0030414 peptidase inhibitor activity; GO:0061134 peptidase regulator activity;	--	--	--	--
F02_cb11266_c19/f1p0/1196	unknown [Picea sitchensis]	3.993	Up	0.0079445	12.779	Up	0.0080401	0.394	--	0.086639	0.123	Down	0.0022816	--	--	--	--	--	--	--
F01_cb4749_c3/f1p1/2482	hypothetical protein AMTR_s00010p00241770 [Amborella trichopoda]	0.399	Down	0.0073038	0.645	Down	0.0040954	2.039	Up	0.0105772	1.262	--	0.107037	GO:0008152 metabolic process; GO:0005975 carbohydrate metabolic process; GO:0044238 primary metabolic process; GO:0071704 organic substance metabolic process;	--	GO:0016757 transferase activity, transferring glycosyl groups; GO:0004134 4-alpha-glucanotransferase activity; GO:0016758 transferase activity, transferring hexosyl groups; GO:0003824 catalytic activity; GO:0016740 transferase activity; GO:0004133 glycogen debranching enzyme activity;	atr:s00010p00241770; AMTR_s00010p00241770; hypothetical protein; K00705 4-alpha-glucanotransferase [EC:2.4.1.25] (A)	ko00500 Starch and sucrose metabolism;	--	--
F02_cb9735_c2676/f1p0/1934	PREDICTED: Lipase-like PAD4 OS=Arabidopsis thaliana GN=PAD4 PE=1 SV=1	0.238	Down	0.008739	--	--	--	--	--	--	--	--	--	GO:0044699 single-organism process; GO:0008152 metabolic process; GO:0044238 primary metabolic process; GO:0044710 single-organism metabolic process; GO:0006629 lipid metabolic process; GO:0071704 organic substance metabolic process;	--	--	--	--	--	--
F02_cb5077_c2/f1p0/2423	hypothetical protein AMTR_s00056p00172610 [Amborella trichopoda]	0.764	Down	0.00146495	--	--	--	--	--	--	--	--	--	GO:0016072 rRNA metabolic process; GO:0006396 RNA processing; GO:0034470 ncRNA processing; GO:0044085 cellular component biogenesis; GO:0022613 ribonucleoprotein complex biogenesis; GO:0006725 cellular aromatic compound metabolic process; GO:0006807 nitrogen compound metabolic process; GO:0042254 ribosome biogenesis; GO:1901360 organic cyclic compound metabolic process; GO:0044238 primary metabol…	--	GO:0004175 endopeptidase activity; GO:0004222 metalloendopeptidase activity; GO:0008233 peptidase activity; GO:0003824 catalytic activity; GO:0070011 peptidase activity, acting on L-amino acid peptides; GO:0016787 hydrolase activity; GO:0008237 metallopeptidase activity;	--	--	--	--
F02_cb13430_c0/f3p0/1418	PREDICTED: membrane-anchored ubiquitin-fold protein 3-like [Phoenix dactylifera]	1.85	Up	0.023484	1.921	--	0.065782	0.622	--	0.079505	0.599	--	0.05596	--	--	GO:0005515 protein binding; GO:0005488 binding;	--	--	--	--
F02_cb10056_c0/f2p0/971	"""PREDICTED: Protein TIC 20-v, chloroplastic OS=Arabidopsis thaliana GN=TIC20-V PE=2 SV=1"""	1.584	Up	0.026478	--	--	--	--	--	--	--	--	--	--	--	--	--	--	--	--
F01_cb5000_c28450/f7p1/2828	PREDICTED: Protein EDS1B OS=Arabidopsis thaliana GN=EDS1B PE=1 SV=1	0.616	Down	7.8878e-05	0.359	--	0.073345	0.938	--	0.65866	1.606	Up	8.3233e-05	GO:0044699 single-organism process; GO:0008152 metabolic process; GO:0044238 primary metabolic process; GO:0044710 single-organism metabolic process; GO:0006629 lipid metabolic process; GO:0071704 organic substance metabolic process;	--	--	--	--	--	--
F01_cb10895_c6/f1p0/1488	hypothetical protein PRUPE_ppa009336mg [Prunus persica]	1.468	Up	0.0217	1.135	--	0.3141	0.532	Down	0.00157556	0.688	Down	0.049962	GO:0044699 single-organism process; GO:0008152 metabolic process; GO:0055114 oxidation-reduction process; GO:0044710 single-organism metabolic process;	--	GO:0019842 vitamin binding; GO:0005506 iron ion binding; GO:0031418 L-ascorbic acid binding; GO:0043167 ion binding; GO:0043177 organic acid binding; GO:0016705 oxidoreductase activity, acting on paired donors, with incorporation or reduction of molecular oxygen; GO:0048029 monosaccharide binding; GO:0016491 oxidoreductase activity; GO:0031406 carboxylic acid binding; GO:0046914 transition metal …	atr:s00001p00155640; AMTR_s00001p00155640; hypothetical protein; K00472 prolyl 4-hydroxylase [EC:1.14.11.2] (A)	ko00330 Arginine and proline metabolism;	E	Prolyl 4-hydroxylase alpha subunit
F02_cb13213_c17/f1p0/698	calcium binding protein [Pinus taeda]	10.228	Up	0.00113686	4.754	Up	0.0194022	0.209	Down	0.018122	0.45	Down	0.0186558	--	--	GO:0043169 cation binding; GO:0046872 metal ion binding; GO:0005509 calcium ion binding; GO:0005488 binding; GO:0043167 ion binding;	pda:103709704; probable calcium-binding protein CML27; K13448 calcium-binding protein CML (A)	ko04626 Plant-pathogen interaction;	T	Calmodulin and related proteins (EF-Hand superfamily)
F02_cb9995_c0/f2p0/1708	PREDICTED: probable UDP-arabinopyranose mutase 5-like isoform 2 [Fragaria vesca subsp. vesca]	3.401	Up	0.0028639	6.557	Up	0.00041704	1.483	Up	0.0224	0.769	--	0.34578	GO:0016051 carbohydrate biosynthetic process; GO:0044711 single-organism biosynthetic process; GO:0006073 cellular glucan metabolic process; GO:0000271 polysaccharide biosynthetic process; GO:0030243 cellulose metabolic process; GO:0044042 glucan metabolic process; GO:0044763 single-organism cellular process; GO:0044699 single-organism process; GO:0033692 cellular polysaccharide biosynthetic proc…	--	GO:0016853 isomerase activity; GO:0016866 intramolecular transferase activity; GO:0003824 catalytic activity;	--	--	--	--
F02_cb14178_c5/f2p0/1267	PREDICTED: Protein EXORDIUM-like 2 OS=Arabidopsis thaliana GN=EXL2 PE=2 SV=1	1.879	Up	0.026657	1.674	--	0.099382	0.514	Down	0.030398	0.577	--	0.067281	--	--	--	--	--	--	--
F02_cb7171_c0/f2p0/2124	hypothetical protein VITISV_032634 [Vitis vinifera]	0.461	Down	0.024857	0.277	Down	0.0022954	0.572	--	0.066059	0.952	--	0.79388	--	--	GO:0097159 organic cyclic compound binding; GO:1901363 heterocyclic compound binding; GO:0046914 transition metal ion binding; GO:0005488 binding; GO:0003676 nucleic acid binding; GO:0043167 ion binding; GO:0046872 metal ion binding; GO:0043169 cation binding; GO:0008270 zinc ion binding;	osa:4349826; Os11g0157000; K12619 5'-3' exoribonuclease 2 [EC:3.1.13.-] (A)	ko03008 Ribosome biogenesis in eukaryotes; ko03018 RNA degradation;	R	FOG: Transposon-encoded proteins with TYA, reverse transcriptase, integrase domains in various combinations
F02_cb5709_c24/f1p1/1866	unknown [Picea sitchensis]	1.496	Up	0.0079416	1.223	Up	0.036036	1.022	--	0.81154	1.25	Up	0.0117403	--	--	--	--	--	R	Predicted hydrolase/acyltransferase (alpha/beta hydrolase superfamily)
F02_cb9389_c126/f1p1/933	PREDICTED: 17.6 kDa class I heat shock protein 3 OS=Arabidopsis thaliana GN=HSP17.6C PE=2 SV=2	7.374	Up	2.4968e-05	5.438	Up	0.00059733	1.179	--	0.4616	1.599	Up	0.0057189	--	--	--	atr:s00009p00236890; AMTR_s00009p00236890; hypothetical protein; K13993 HSP20 family protein (A)	ko04141 Protein processing in endoplasmic reticulum;	O	Molecular chaperone (small heat-shock protein Hsp26/Hsp42)
F01_cb2288_c1/f2p0/2807	"""PREDICTED: Protein ACCUMULATION AND REPLICATION OF CHLOROPLASTS 6, chloroplastic OS=Arabidopsis thaliana GN=ARC6 PE=1 SV=1"""	1.483	Up	0.0183175	--	--	--	--	--	--	--	--	--	--	--	--	--	--	--	--
F02_cb12626_c3/f2p0/1611	PREDICTED: Nuclear pore complex protein NUP43 OS=Arabidopsis thaliana GN=NUP43 PE=1 SV=1	0.564	Down	0.021741	0.772	Down	0.020536	1.5	Up	0.0023619	1.096	--	0.5176	--	--	GO:0005515 protein binding; GO:0005488 binding;	atr:s00019p00076100; AMTR_s00019p00076100; hypothetical protein; K14305 nuclear pore complex protein Nup43 (A)	ko03013 RNA transport;	--	--
F01_cb12757_c9/f1p0/3178	auxin induced-like protein [Picea sitchensis]	0.077	Down	0.007482	--	--	--	--	--	--	--	--	--	--	--	--	--	--	T	Predicted membrane protein, contains DoH and Cytochrome b-561/ferric reductase transmembrane domains
F02_cb9604_c1/f1p0/1673	PREDICTED: uncharacterized protein LOC104613002 [Nelumbo nucifera]	0.563	Down	0.044464	--	--	--	--	--	--	--	--	--	GO:0008152 metabolic process; GO:0044237 cellular metabolic process; GO:0009987 cellular process; GO:0015979 photosynthesis;	GO:0016020 membrane; GO:0009523 photosystem II; GO:0019898 extrinsic component of membrane; GO:0098796 membrane protein complex; GO:0009654 photosystem II oxygen evolving complex; GO:0042651 thylakoid membrane; GO:0032991 macromolecular complex; GO:0044424 intracellular part; GO:0005623 cell; GO:0034357 photosynthetic membrane; GO:0009521 photosystem; GO:1902494 catalytic complex; GO:0044425 memb…	GO:0043169 cation binding; GO:0046872 metal ion binding; GO:0005509 calcium ion binding; GO:0005488 binding; GO:0043167 ion binding;	--	--	J	Putative mitochondrial/chloroplast ribosomal protein L45
F02_cb9735_c17372/f1p0/2785	PREDICTED: Heterogeneous nuclear ribonucleoprotein 1 OS=Arabidopsis thaliana GN=RNP1 PE=1 SV=1	1.795	Up	0.045505	1.528	Up	0.045824	0.558	Down	0.04554	0.656	Down	0.048756	--	--	GO:0097159 organic cyclic compound binding; GO:1901363 heterocyclic compound binding; GO:1901265 nucleoside phosphate binding; GO:0005488 binding; GO:0003676 nucleic acid binding; GO:0000166 nucleotide binding; GO:0036094 small molecule binding;	vvi:100247389; RNA-binding protein Musashi homolog 2; K14411 RNA-binding protein Musashi (A)	ko03015 mRNA surveillance pathway;	R	FOG: RRM domain
F01_cb5403_c0/f1p0/2360	PREDICTED: uncharacterized protein LOC104598544 isoform X1 [Nelumbo nucifera]	1.457	Up	0.00137978	0.962	--	0.81316	0.357	Down	0.00199999	0.54	Down	0.0063551	--	GO:0016020 membrane;	GO:0003824 catalytic activity; GO:0016740 transferase activity; GO:0016772 transferase activity, transferring phosphorus-containing groups;	obr:102700661; phosphatidate cytidylyltransferase-like; K00981 phosphatidate cytidylyltransferase [EC:2.7.7.41] (A)	ko00564 Glycerophospholipid metabolism; ko04070 Phosphatidylinositol signaling system;	I	CDP-diacylglycerol synthase
F02_cb4969_c9/f1p0/1461	"""PREDICTED: mechanosensitive ion channel protein 1, mitochondrial [Vitis vinifera]"""	1.826	Up	0.0107435	--	--	--	--	--	--	--	--	--	GO:0006810 transport; GO:0055085 transmembrane transport; GO:0051179 localization; GO:0051234 establishment of localization;	GO:0016020 membrane;	--	--	--	--	--
F01_cb3424_c7/f5p0/1794	PREDICTED: GABA transporter 1 [Vitis vinifera]	0.385	Down	0.0030405	0.309	Down	7.571e-05	0.67	Down	0.0056785	0.835	--	0.31754	--	--	--	--	--	E	Amino acid transporters
F02_cb7441_c2/f1p0/1992	unknown [Picea sitchensis]	0.763	Down	0.0111838	1.016	--	0.91698	2.093	Up	0.00152256	1.574	Up	0.00142249	GO:0044085 cellular component biogenesis; GO:0043248 proteasome assembly; GO:0016043 cellular component organization; GO:0034622 cellular macromolecular complex assembly; GO:0071822 protein complex subunit organization; GO:0022607 cellular component assembly; GO:0065003 macromolecular complex assembly; GO:0070271 protein complex biogenesis; GO:0009987 cellular process; GO:0006461 protein complex …	--	GO:0005488 binding;	--	--	O	26S proteasome regulatory complex, subunit PSMD5
F02_cb14726_c2/f1p0/1409	unknown [Picea sitchensis]	1.854	Up	0.004738	5.498	Up	0.00048398	0.718	Down	0.0141847	0.242	Down	0.00143546	--	--	--	--	--	--	--
F02_cb3665_c1/f1p0/2885	PREDICTED: Glycine-rich domain-containing protein 1 OS=Arabidopsis thaliana GN=GRDP1 PE=2 SV=1	0.222	Down	0.039121	--	--	--	--	--	--	--	--	--	--	--	--	--	--	--	--
F01_cb15776_c1/f1p0/1017	unknown [Picea sitchensis]	1.362	Up	0.0089446	1.117	--	0.55616	1.236	--	0.26274	1.507	Up	0.00080383	--	--	--	--	--	S	Uncharacterized conserved protein
F01_cb10952_c15/f7p0/1402	PREDICTED: Probable cinnamyl alcohol dehydrogenase 1 OS=Arabidopsis thaliana GN=CAD1 PE=2 SV=1	0.167	Down	0.0067428	0.146	Down	5.5659e-05	0.866	--	0.48176	0.994	--	0.83484	GO:0044699 single-organism process; GO:0008152 metabolic process; GO:0055114 oxidation-reduction process; GO:0044710 single-organism metabolic process;	--	GO:0046914 transition metal ion binding; GO:0003824 catalytic activity; GO:0005488 binding; GO:0043167 ion binding; GO:0046872 metal ion binding; GO:0043169 cation binding; GO:0008270 zinc ion binding; GO:0016491 oxidoreductase activity;	--	--	Q	Alcohol dehydrogenase, class V
F01_cb6684_c0/f1p0/2124	PREDICTED: uncharacterized protein LOC101291921 [Fragaria vesca subsp. vesca]	0.479	Down	0.027635	0.679	Down	0.0100577	0.456	Down	0.00062466	0.321	Down	0.0061574	--	--	--	--	--	--	--
F02_cb13535_c9/f1p0/1407	PREDICTED: UDP-glycosyltransferase 72B1 OS=Arabidopsis thaliana GN=UGT72B1 PE=1 SV=1	2.842	Up	0.00052459	1.343	Up	0.045281	1.398	Up	0.0062967	2.958	Up	0.00125551	GO:0008152 metabolic process;	--	GO:0016757 transferase activity, transferring glycosyl groups; GO:0016758 transferase activity, transferring hexosyl groups; GO:0003824 catalytic activity; GO:0016740 transferase activity;	--	--	GC	UDP-glucuronosyl and UDP-glucosyl transferase
F02_cb3074_c40/f1p0/2600	PREDICTED: Eukaryotic translation initiation factor 3 subunit B OS=Arabidopsis thaliana GN=TIF3B1 PE=1 SV=1	1.574	Up	0.00158317	0.794	Down	0.023695	0.491	Down	0.00038374	0.973	--	0.70492	GO:0006518 peptide metabolic process; GO:0043043 peptide biosynthetic process; GO:0044267 cellular protein metabolic process; GO:0006807 nitrogen compound metabolic process; GO:0009058 biosynthetic process; GO:0043603 cellular amide metabolic process; GO:0044238 primary metabolic process; GO:1901566 organonitrogen compound biosynthetic process; GO:0044237 cellular metabolic process; GO:1901576 or…	GO:0044464 cell part; GO:0005622 intracellular; GO:0005737 cytoplasm; GO:0032991 macromolecular complex; GO:0044424 intracellular part; GO:0043234 protein complex; GO:0005623 cell; GO:0044444 cytoplasmic part; GO:0005852 eukaryotic translation initiation factor 3 complex;	GO:0097159 organic cyclic compound binding; GO:1901363 heterocyclic compound binding; GO:0008135 translation factor activity, RNA binding; GO:0003723 RNA binding; GO:1901265 nucleoside phosphate binding; GO:0031369 translation initiation factor binding; GO:0005488 binding; GO:0003676 nucleic acid binding; GO:0003743 translation initiation factor activity; GO:0005515 protein binding; GO:0000166 nu…	atr:s00037p00235640; AMTR_s00037p00235640; hypothetical protein; K03253 translation initiation factor 3 subunit B (A)	ko03013 RNA transport;	J	Translation initiation factor 3, subunit b (eIF-3b)
F02_cb3483_c1/f1p0/3160	"""PREDICTED: ATP synthase subunit O, mitochondrial OS=Ipomoea batatas PE=1 SV=1"""	1.456	Up	0.04386	--	--	--	--	--	--	--	--	--	GO:0009116 nucleoside metabolic process; GO:0042278 purine nucleoside metabolic process; GO:0009167 purine ribonucleoside monophosphate metabolic process; GO:0009117 nucleotide metabolic process; GO:0044699 single-organism process; GO:0046129 purine ribonucleoside biosynthetic process; GO:0009163 nucleoside biosynthetic process; GO:0009058 biosynthetic process; GO:0009156 ribonucleoside monophosp…	--	GO:0022804 active transmembrane transporter activity; GO:0042625 ATPase coupled ion transmembrane transporter activity; GO:0015075 ion transmembrane transporter activity; GO:0022853 active ion transmembrane transporter activity; GO:0015399 primary active transmembrane transporter activity; GO:0022892 substrate-specific transporter activity; GO:0044769 ATPase activity, coupled to transmembrane mov…	pda:103705842; ATP synthase subunit O, mitochondrial-like; K02137 F-type H+-transporting ATPase subunit O (A)	ko00190 Oxidative phosphorylation;	C	Mitochondrial F1F0-ATP synthase, subunit OSCP/ATP5
F01_cb7499_c4/f2p0/1817	PREDICTED: Scopoletin glucosyltransferase OS=Nicotiana tabacum GN=TOGT1 PE=1 SV=1	0.372	Down	0.024943	0.683	--	0.3657	1.121	--	0.95414	0.611	--	0.22652	--	--	--	--	--	GC	UDP-glucuronosyl and UDP-glucosyl transferase
F02_cb7720_c2/f1p0/1837	"""PREDICTED: monodehydroascorbate reductase, chloroplastic [Nelumbo nucifera]"""	0.378	Down	0.020502	0.697	Down	0.022983	0.887	--	0.4853	0.481	--	0.089044	GO:0044699 single-organism process; GO:0008152 metabolic process; GO:0055114 oxidation-reduction process; GO:0044710 single-organism metabolic process;	--	GO:0003824 catalytic activity; GO:0016491 oxidoreductase activity;	vvi:100253570; monodehydroascorbate reductase, chloroplastic; K08232 monodehydroascorbate reductase (NADH) [EC:1.6.5.4] (A)	ko00053 Ascorbate and aldarate metabolism;	R	Monodehydroascorbate/ferredoxin reductase
F02_cb10568_c5/f1p0/1042	PREDICTED: Uncharacterized protein At4g28440 OS=Arabidopsis thaliana GN=At4g28440 PE=1 SV=1	1.72	Up	0.0186005	0.912	--	0.45074	0.301	Down	0.0035366	0.569	Down	0.023002	--	--	--	atr:s00058p00174410; AMTR_s00058p00174410; hypothetical protein; K07466 replication factor A1 (A)	ko03430 Mismatch repair; ko03440 Homologous recombination; ko03030 DNA replication; ko03420 Nucleotide excision repair;	--	--
F01_cb14421_c0/f2p0/1197	"""PREDICTED: Nucleoside diphosphate kinase 2, chloroplastic OS=Nicotiana tabacum GN=NDPK2 PE=1 SV=1"""	0.76	Down	0.033862	1.105	--	0.47874	1.668	Up	0.0053839	1.147	--	0.4656	GO:0042278 purine nucleoside metabolic process; GO:0009116 nucleoside metabolic process; GO:0046132 pyrimidine ribonucleoside biosynthetic process; GO:0006165 nucleoside diphosphate phosphorylation; GO:0009147 pyrimidine nucleoside triphosphate metabolic process; GO:0009117 nucleotide metabolic process; GO:0044699 single-organism process; GO:0046129 purine ribonucleoside biosynthetic process; GO:…	--	GO:0016301 kinase activity; GO:0003824 catalytic activity; GO:0004550 nucleoside diphosphate kinase activity; GO:0019205 nucleobase-containing compound kinase activity; GO:0016740 transferase activity; GO:0016776 phosphotransferase activity, phosphate group as acceptor; GO:0016772 transferase activity, transferring phosphorus-containing groups;	rcu:RCOM_1507310; nucleoside diphosphate kinase, putative (EC:2.7.4.6); K00940 nucleoside-diphosphate kinase [EC:2.7.4.6] (A)	ko00230 Purine metabolism; ko00240 Pyrimidine metabolism;	F	Nucleoside diphosphate kinase
F02_cb12504_c55/f72p3/2292	"""PREDICTED: Chaperonin 60 subunit alpha 1, chloroplastic OS=Arabidopsis thaliana GN=CPN60A1 PE=1 SV=2"""	1.365	Up	0.00090404	1.046	--	0.52652	0.76	Down	0.0122826	0.993	--	0.81028	GO:0006457 protein folding; GO:0009987 cellular process; GO:0042026 protein refolding;	GO:0044424 intracellular part; GO:0005623 cell; GO:0044464 cell part; GO:0005622 intracellular; GO:0005737 cytoplasm;	GO:0005524 ATP binding; GO:1901265 nucleoside phosphate binding; GO:0001882 nucleoside binding; GO:0043167 ion binding; GO:0000166 nucleotide binding; GO:0097159 organic cyclic compound binding; GO:1901363 heterocyclic compound binding; GO:0032549 ribonucleoside binding; GO:0097367 carbohydrate derivative binding; GO:0032553 ribonucleotide binding; GO:0005488 binding; GO:0032550 purine ribonucleo…	--	--	O	Mitochondrial chaperonin, Cpn60/Hsp60p
F02_cb8591_c6/f1p0/1490	unknown [Picea sitchensis]	0.589	Down	0.0109834	0.997	--	0.9089	1.497	Up	0.0266	0.884	--	0.38772	GO:0008152 metabolic process; GO:0032259 methylation;	--	GO:0016741 transferase activity, transferring one-carbon groups; GO:0008168 methyltransferase activity; GO:0003824 catalytic activity; GO:0016740 transferase activity;	--	--	O	Carboxymethyl transferase
F02_cb9735_c15873/f1p1/3385	PREDICTED: transmembrane 9 superfamily member 4 [Nelumbo nucifera]	1.77	Up	0.026816	1.39	Up	0.033205	0.59	Down	0.0183591	0.751	--	0.132779	--	GO:0031224 intrinsic component of membrane; GO:0016020 membrane; GO:0016021 integral component of membrane; GO:0044425 membrane part;	--	--	--	U	Endosomal membrane proteins, EMP70
F01_cb5191_c10/f1p0/2016	PREDICTED: LysM domain receptor-like kinase 3 OS=Medicago truncatula GN=LYK3 PE=1 SV=1	1.495	Up	0.0068607	0.889	--	0.29516	0.85	--	0.20856	1.43	Up	0.0055801	GO:0016310 phosphorylation; GO:0044267 cellular protein metabolic process; GO:0044238 primary metabolic process; GO:0044237 cellular metabolic process; GO:0006796 phosphate-containing compound metabolic process; GO:0071704 organic substance metabolic process; GO:0008152 metabolic process; GO:0006468 protein phosphorylation; GO:0006793 phosphorus metabolic process; GO:0044260 cellular macromolecul…	--	GO:0005524 ATP binding; GO:1901265 nucleoside phosphate binding; GO:0016773 phosphotransferase activity, alcohol group as acceptor; GO:0001882 nucleoside binding; GO:0043167 ion binding; GO:0004672 protein kinase activity; GO:0000166 nucleotide binding; GO:0097159 organic cyclic compound binding; GO:1901363 heterocyclic compound binding; GO:0032549 ribonucleoside binding; GO:0097367 carbohydrate …	--	--	T	Serine/threonine protein kinase
F01_cb13303_c8/f1p0/1042	PREDICTED: triphosphate tunel metalloenzyme 3-like isoform X1 [Nelumbo nucifera]	1.527	Up	0.0101403	0.634	Down	0.03962	0.766	--	0.103923	1.843	Up	0.007144	--	--	--	--	--	--	--
F02_cb15655_c3/f4p0/1293	PREDICTED: Annexin D1 OS=Arabidopsis thaliana GN=ANN1 PE=1 SV=1	2.148	Up	0.0059394	--	--	--	--	--	--	--	--	--	--	--	GO:0005544 calcium-dependent phospholipid binding; GO:0005488 binding; GO:0005543 phospholipid binding; GO:0043167 ion binding; GO:0008289 lipid binding; GO:0043169 cation binding; GO:0046872 metal ion binding; GO:0043168 anion binding; GO:0005509 calcium ion binding;	--	--	U	Annexin
F01_cb5271_c52/f1p0/2795	PREDICTED: transmembrane 9 superfamily member 7 [Populus euphratica]	2.343	Up	0.039803	1.487	Up	0.044399	0.497	Down	0.0139624	0.783	--	0.62066	--	GO:0031224 intrinsic component of membrane; GO:0016020 membrane; GO:0016021 integral component of membrane; GO:0044425 membrane part;	--	--	--	U	Endosomal membrane proteins, EMP70
F02_cb996_c5/f1p1/2837	PREDICTED: ABC transporter B family member 20 [Nelumbo nucifera]	1.733	Up	0.032381	1.013	--	0.8513	0.384	Down	0.000118874	0.657	--	0.092519	GO:0006810 transport; GO:0055085 transmembrane transport; GO:0051179 localization; GO:0051234 establishment of localization;	GO:0031224 intrinsic component of membrane; GO:0016020 membrane; GO:0016021 integral component of membrane; GO:0044425 membrane part;	GO:1901265 nucleoside phosphate binding; GO:0015399 primary active transmembrane transporter activity; GO:0016817 hydrolase activity, acting on acid anhydrides; GO:0016787 hydrolase activity; GO:0016887 ATPase activity; GO:0097159 organic cyclic compound binding; GO:1901363 heterocyclic compound binding; GO:0016462 pyrophosphatase activity; GO:0003824 catalytic activity; GO:0032553 ribonucleotide…	gmx:100779000; ABC transporter B family member 6-like; K05658 ATP-binding cassette, subfamily B (MDR/TAP), member 1 [EC:3.6.3.44] (A)	ko02010 ABC transporters;	Q	Multidrug/pheromone exporter, ABC superfamily
F02_cb8201_c961/f1p1/1348	PREDICTED: Expansin-like A1 OS=Oryza sativa subsp. japonica GN=EXLA1 PE=2 SV=1	3.34	Up	0.021256	--	--	--	--	--	--	--	--	--	--	GO:0005576 extracellular region;	--	--	--	--	--
F02_cb1634_c3/f1p3/3515	PREDICTED: ADP-ribosylation factor GTPase-activating protein AGD3 isoform X1 [Elaeis guineensis]	0.764	Down	0.037962	0.954	--	0.72288	1.23	--	0.051505	0.985	--	0.8885	--	GO:0044424 intracellular part; GO:0005623 cell; GO:0044464 cell part; GO:0005622 intracellular; GO:0005737 cytoplasm;	GO:0030234 enzyme regulator activity; GO:0060589 nucleoside-triphosphatase regulator activity; GO:0005488 binding; GO:0030695 GTPase regulator activity; GO:0005515 protein binding; GO:0098772 molecular function regulator; GO:0008047 enzyme activator activity; GO:0005096 GTPase activator activity;	pda:103723881; ADP-ribosylation factor GTPase-activating protein AGD3-like; K12489 Arf-GAP with coiled-coil, ANK repeat and PH domain-containing protein (A)	ko04144 Endocytosis;	T	Putative GTPase activating proteins (GAPs)
F02_cb16041_c1/f1p0/1472	unknown [Picea sitchensis]	2.011	Up	0.00108138	2.096	Up	0.029082	1.206	--	0.5112	1.157	--	0.157377	--	--	--	--	--	R	Predicted hydrolase/acyltransferase (alpha/beta hydrolase superfamily)
F01_cb12132_c0/f3p0/1275	PREDICTED: Pathogenesis-related protein 5 OS=Arabidopsis thaliana GN=At1g75040 PE=1 SV=1	1.593	Up	0.049898	1.979	--	0.30158	0.139	Down	0.0079971	0.112	Down	0.00186429	--	--	--	--	--	--	--
F01_cb11639_c1/f3p0/662	unknown [Picea sitchensis]	2.293	Up	0.028842	--	--	--	--	--	--	--	--	--	--	--	--	--	--	--	--
F02_cb13295_c1/f2p1/1499	unknown [Picea sitchensis]	5.17	Up	0.0141171	3.917	--	0.21072	0.578	--	0.2713	0.762	--	0.5258	GO:0051188 cofactor biosynthetic process; GO:0042181 ketone biosynthetic process; GO:1901663 quinone biosynthetic process; GO:0006744 ubiquinone biosynthetic process; GO:0006733 oxidoreduction coenzyme metabolic process; GO:0044711 single-organism biosynthetic process; GO:1901661 quinone metabolic process; GO:0044281 small molecule metabolic process; GO:0044763 single-organism cellular process; G…	--	--	--	--	S	Uncharacterized conserved protein
F02_cb5445_c12/f1p0/1953	PREDICTED: Glycerol kinase OS=Arabidopsis thaliana GN=GLPK PE=1 SV=1	0.345	Down	0.046259	--	--	--	--	--	--	--	--	--	GO:0008152 metabolic process; GO:0006793 phosphorus metabolic process; GO:0052646 alditol phosphate metabolic process; GO:1901135 carbohydrate derivative metabolic process; GO:0019637 organophosphate metabolic process; GO:0006072 glycerol-3-phosphate metabolic process; GO:0005975 carbohydrate metabolic process; GO:0044238 primary metabolic process; GO:0044237 cellular metabolic process; GO:000998…	--	GO:0004370 glycerol kinase activity; GO:0016301 kinase activity; GO:0016773 phosphotransferase activity, alcohol group as acceptor; GO:0003824 catalytic activity; GO:0016740 transferase activity; GO:0016772 transferase activity, transferring phosphorus-containing groups;	tcc:TCM_027288; Actin-like ATPase superfamily protein isoform 1; K00864 glycerol kinase [EC:2.7.1.30] (A)	ko00561 Glycerolipid metabolism; ko04626 Plant-pathogen interaction;	G	Ribulose kinase and related carbohydrate kinases
F01_cb7622_c46/f45p1/1869	PREDICTED: Bifunctional nitrilase/nitrile hydratase NIT4A OS=Lupinus angustifolius GN=NIT4A PE=1 SV=1	0.335	Down	0.00020147	0.216	Down	0.000155108	0.78	--	0.06628	1.212	--	0.101444	GO:0006807 nitrogen compound metabolic process; GO:0008152 metabolic process;	--	GO:0016787 hydrolase activity; GO:0003824 catalytic activity; GO:0016810 hydrolase activity, acting on carbon-nitrogen (but not peptide) bonds;	cam:101500877; bifunctional nitrilase/nitrile hydratase NIT4B-like; K13035 beta-cyano-L-alanine hydratase/nitrilase [EC:3.5.5.4 4.2.1.65] (A)	ko00460 Cyanoamino acid metabolism;	E	Carbon-nitrogen hydrolase
F01_cb8073_c12/f1p0/1661	PREDICTED: UDP-glycosyltransferase 72B1 OS=Arabidopsis thaliana GN=UGT72B1 PE=1 SV=1	0.531	Down	0.0051372	0.218	Down	0.00034414	0.426	Down	0.0024596	1.039	--	0.81618	GO:0008152 metabolic process;	--	GO:0016757 transferase activity, transferring glycosyl groups; GO:0016758 transferase activity, transferring hexosyl groups; GO:0003824 catalytic activity; GO:0016740 transferase activity;	--	--	GC	UDP-glucuronosyl and UDP-glucosyl transferase
F02_cb9152_c1/f1p0/2250	unknown [Picea sitchensis]	1.31	Up	0.042024	1.302	--	0.066836	0.871	--	0.25488	0.877	--	0.22698	GO:1901071 glucosamine-containing compound metabolic process; GO:0006030 chitin metabolic process; GO:0006026 aminoglycan catabolic process; GO:1901136 carbohydrate derivative catabolic process; GO:0006807 nitrogen compound metabolic process; GO:0006032 chitin catabolic process; GO:0005975 carbohydrate metabolic process; GO:0044238 primary metabolic process; GO:1901072 glucosamine-containing comp…	--	GO:0004553 hydrolase activity, hydrolyzing O-glycosyl compounds; GO:0016787 hydrolase activity; GO:0004568 chitinase activity; GO:0003824 catalytic activity; GO:0016798 hydrolase activity, acting on glycosyl bonds;	--	--	G	Predicted member of glycosyl hydrolase family 18
F01_cb7959_c38/f3p0/1927	PREDICTED: Flowering locus K homology domain OS=Arabidopsis thaliana GN=FLK PE=1 SV=1	0.657	Down	0.00091705	0.874	--	0.52756	1.714	--	0.27122	1.289	Up	0.0086837	--	--	GO:0097159 organic cyclic compound binding; GO:1901363 heterocyclic compound binding; GO:0003723 RNA binding; GO:0005488 binding; GO:0003676 nucleic acid binding;	--	--	AR	PolyC-binding proteins alphaCP-1 and related KH domain proteins
F01_cb5000_c2735/f3p5/2167	"""PREDICTED: ATP synthase subunit beta, mitochondrial OS=Nicotiana plumbaginifolia GN=ATPB PE=1 SV=1"""	1.255	Up	0.025882	1.114	--	0.177257	0.936	--	0.4772	1.054	--	0.24218	GO:0009116 nucleoside metabolic process; GO:0042278 purine nucleoside metabolic process; GO:0009167 purine ribonucleoside monophosphate metabolic process; GO:0009117 nucleotide metabolic process; GO:0044699 single-organism process; GO:0046129 purine ribonucleoside biosynthetic process; GO:0009163 nucleoside biosynthetic process; GO:0009058 biosynthetic process; GO:0009156 ribonucleoside monophosp…	GO:0045261 proton-transporting ATP synthase complex, catalytic core F(1); GO:0016020 membrane; GO:0098796 membrane protein complex; GO:0044425 membrane part; GO:0044464 cell part; GO:0005622 intracellular; GO:0016469 proton-transporting two-sector ATPase complex; GO:0032991 macromolecular complex; GO:0033178 proton-transporting two-sector ATPase complex, catalytic domain; GO:0044424 intracellular…	GO:0042625 ATPase coupled ion transmembrane transporter activity; GO:1901265 nucleoside phosphate binding; GO:0015399 primary active transmembrane transporter activity; GO:0022892 substrate-specific transporter activity; GO:0016817 hydrolase activity, acting on acid anhydrides; GO:0044769 ATPase activity, coupled to transmembrane movement of ions, rotational mechanism; GO:0015077 monovalent inorg…	sita:101763014; uncharacterized LOC101763014; K02133 F-type H+-transporting ATPase subunit beta [EC:3.6.3.14] (A)	ko00190 Oxidative phosphorylation;	C	F0F1-type ATP synthase, beta subunit
F01_cb1055_c2/f1p0/3316	hypothetical protein AMTR_s00053p00213400 [Amborella trichopoda]	1.733	Up	0.0139642	--	--	--	--	--	--	--	--	--	GO:0070588 calcium ion transmembrane transport; GO:0072511 divalent inorganic cation transport; GO:0098655 cation transmembrane transport; GO:0034220 ion transmembrane transport; GO:0098660 inorganic ion transmembrane transport; GO:0030001 metal ion transport; GO:0051234 establishment of localization; GO:0006810 transport; GO:0055085 transmembrane transport; GO:0006812 cation transport; GO:000681…	GO:0031224 intrinsic component of membrane; GO:0016020 membrane; GO:0016021 integral component of membrane; GO:0044425 membrane part;	GO:0042625 ATPase coupled ion transmembrane transporter activity; GO:1901265 nucleoside phosphate binding; GO:0015399 primary active transmembrane transporter activity; GO:0022892 substrate-specific transporter activity; GO:0016817 hydrolase activity, acting on acid anhydrides; GO:0016787 hydrolase activity; GO:0022891 substrate-specific transmembrane transporter activity; GO:0016887 ATPase activ…	--	--	P	Calcium transporting ATPase
F02_cb10906_c2/f1p0/714	PREDICTED: Monothiol glutaredoxin-S10 OS=Oryza sativa subsp. japonica GN=GRXS10 PE=2 SV=2	1.943	Up	0.0132195	--	--	--	--	--	--	--	--	--	GO:0050794 regulation of cellular process; GO:0042592 homeostatic process; GO:0065008 regulation of biological quality; GO:0050789 regulation of biological process; GO:0045454 cell redox homeostasis; GO:0044763 single-organism cellular process; GO:0019725 cellular homeostasis; GO:0044699 single-organism process; GO:0009987 cellular process; GO:0065007 biological regulation;	--	GO:0009055 electron carrier activity; GO:0015035 protein disulfide oxidoreductase activity; GO:0016667 oxidoreductase activity, acting on a sulfur group of donors; GO:0015036 disulfide oxidoreductase activity; GO:0003824 catalytic activity; GO:0016491 oxidoreductase activity;	--	--	O	Glutaredoxin and related proteins
F01_cb14577_c2/f3p0/1558	PREDICTED: UDP-glycosyltransferase 73B4 OS=Arabidopsis thaliana GN=UGT73B4 PE=2 SV=1	0.38	Down	0.0035957	0.744	Down	0.0124999	1.471	Up	0.040244	0.75	--	0.068476	GO:0008152 metabolic process;	--	GO:0016757 transferase activity, transferring glycosyl groups; GO:0016758 transferase activity, transferring hexosyl groups; GO:0003824 catalytic activity; GO:0016740 transferase activity;	--	--	GC	UDP-glucuronosyl and UDP-glucosyl transferase
F01_cb7658_c4/f1p1/1905	"""PREDICTED: Probable sodium/metabolite cotransporter BASS2, chloroplastic OS=Oryza sativa subsp. japonica GN=BASS2 PE=2 SV=1"""	1.991	Up	0.0080831	2.74	--	0.05056	1.444	--	0.2668	1.05	--	0.36674	--	GO:0016020 membrane;	--	--	--	P	Na+-bile acid cotransporter
F01_cb14594_c0/f1p0/675	PREDICTED: Basic blue protein OS=Arabidopsis thaliana GN=ARPN PE=2 SV=2	0.415	Down	0.0118805	0.605	--	0.053642	0.348	Down	0.0061408	0.238	Down	0.00166066	--	--	GO:0009055 electron carrier activity;	--	--	--	--
F02_cb1489_c27/f1p2/1901	PREDICTED: WD-40 repeat-containing protein MSI4-like [Phoenix dactylifera]	0.629	Down	0.0134812	--	--	--	--	--	--	--	--	--	--	--	--	--	--	B	Nucleosome remodeling factor, subunit CAF1/NURF55/MSI1
F02_cb10002_c27/f1p0/1018	tau class glutathione S-transferase [Pinus tabuliformis]	1.413	Up	0.0117217	--	--	--	--	--	--	--	--	--	--	--	GO:0005515 protein binding; GO:0005488 binding;	gmx:547597; In2-1 protein; K00799 glutathione S-transferase [EC:2.5.1.18] (A)	ko00480 Glutathione metabolism;	O	Glutathione S-transferase
F02_cb12932_c1/f1p0/1236	PREDICTED: Chitinase 2 OS=Tulipa bakeri PE=1 SV=1	2.257	Up	0.0174046	0.817	--	0.40928	0.301	Down	0.0089794	0.831	--	0.44414	GO:0008152 metabolic process; GO:0005975 carbohydrate metabolic process; GO:0044238 primary metabolic process; GO:0071704 organic substance metabolic process;	--	GO:0004553 hydrolase activity, hydrolyzing O-glycosyl compounds; GO:0016787 hydrolase activity; GO:0003824 catalytic activity; GO:0016798 hydrolase activity, acting on glycosyl bonds;	--	--	--	--
F01_cb4635_c14/f1p0/2373	hypothetical protein AMTR_s00029p00181840 [Amborella trichopoda]	0.321	Down	0.0028386	1.19	--	0.52878	1.8	--	0.051662	0.486	Down	0.020281	GO:0016310 phosphorylation; GO:0044267 cellular protein metabolic process; GO:0044238 primary metabolic process; GO:0044237 cellular metabolic process; GO:0006796 phosphate-containing compound metabolic process; GO:0071704 organic substance metabolic process; GO:0008152 metabolic process; GO:0006468 protein phosphorylation; GO:0006793 phosphorus metabolic process; GO:0044260 cellular macromolecul…	--	GO:0005524 ATP binding; GO:1901265 nucleoside phosphate binding; GO:0016773 phosphotransferase activity, alcohol group as acceptor; GO:0001882 nucleoside binding; GO:0043167 ion binding; GO:0005515 protein binding; GO:0004672 protein kinase activity; GO:0000166 nucleotide binding; GO:0097159 organic cyclic compound binding; GO:1901363 heterocyclic compound binding; GO:0032549 ribonucleoside bindi…	atr:s00149p00051550; AMTR_s00149p00051550; hypothetical protein; K14500 BR-signaling kinase [EC:2.7.11.1] (A)	ko04075 Plant hormone signal transduction;	T	Serine/threonine protein kinase
F01_cb11452_c4/f1p1/1497	PREDICTED: Stromal cell-derived factor 2-like protein OS=Arabidopsis thaliana GN=SDF2 PE=1 SV=1	0.399	Down	0.0048199	0.27	Down	0.0026772	0.746	--	0.129218	1.105	--	0.63974	--	GO:0016020 membrane;	--	--	--	R	Uncharacterized secreted protein SDF2 (Stromal cell-derived factor 2), contains MIR domains
F01_cb4213_c24/f1p0/1635	L-asparaginase [Pinus sylvestris]	2.407	Up	0.0172155	--	--	--	--	--	--	--	--	--	--	--	GO:0016787 hydrolase activity; GO:0003824 catalytic activity;	--	--	E	Asparaginase
F02_cb6490_c3/f4p0/2010	PREDICTED: Pectinesterase/pectinesterase inhibitor OS=Ficus pumila var. awkeotsang PE=1 SV=1	0.617	Down	0.038097	0.656	--	0.090683	0.943	--	0.63836	0.887	--	0.58588	GO:0071554 cell wall organization or biogenesis; GO:0016043 cellular component organization; GO:0071555 cell wall organization; GO:0045229 external encapsulating structure organization; GO:0009987 cellular process; GO:0071840 cellular component organization or biogenesis; GO:0042545 cell wall modification;	GO:0005618 cell wall; GO:0030312 external encapsulating structure; GO:0005623 cell; GO:0044464 cell part; GO:0071944 cell periphery;	GO:0016787 hydrolase activity; GO:0052689 carboxylic ester hydrolase activity; GO:0004857 enzyme inhibitor activity; GO:0098772 molecular function regulator; GO:0030234 enzyme regulator activity; GO:0003824 catalytic activity; GO:0030599 pectinesterase activity; GO:0016788 hydrolase activity, acting on ester bonds;	atr:s00129p00044320; AMTR_s00129p00044320; hypothetical protein; K01051 pectinesterase [EC:3.1.1.11] (A)	ko00500 Starch and sucrose metabolism; ko00040 Pentose and glucuronate interconversions;	--	--
F01_cb6825_c1/f1p0/2093	"""PREDICTED: S-adenosylmethionine carrier 1, chloroplastic/mitochondrial OS=Arabidopsis thaliana GN=SAMC1 PE=1 SV=1"""	1.417	Up	0.02754	--	--	--	--	--	--	--	--	--	GO:0006810 transport; GO:0055085 transmembrane transport; GO:0051179 localization; GO:0051234 establishment of localization;	--	--	--	--	C	Mitochondrial carrier protein MRS3/4
F02_cb4314_c7/f1p0/2288	unknown [Picea sitchensis]	2.625	Up	0.044759	2.417	Up	0.0191838	1.016	--	0.93472	1.104	--	0.64572	--	--	--	--	--	--	--
F02_cb8657_c4/f1p2/1796	PREDICTED: aminoacyl tRNA synthase complex-interacting multifunctional protein 1 [Eucalyptus grandis]	1.336	Up	0.028381	0.729	--	0.113256	0.501	Down	0.0168009	0.919	--	0.22168	--	--	GO:0097159 organic cyclic compound binding; GO:1901363 heterocyclic compound binding; GO:0003723 RNA binding; GO:0000049 tRNA binding; GO:0005488 binding; GO:0003676 nucleic acid binding;	--	--	J	tRNA-binding protein
F01_cb12715_c27/f1p0/1205	unknown [Picea sitchensis]	0.147	Down	0.00145592	0.19	--	0.24714	0.328	Down	0.0054378	0.254	--	0.062997	--	--	--	--	--	--	--
F02_cb11075_c3/f1p0/1174	"""PREDICTED: Protein PAM71-homolog, chloroplastic OS=Arabidopsis thaliana GN=PAM71-HL PE=1 SV=2"""	1.913	Up	0.0081611	--	--	--	--	--	--	--	--	--	--	--	--	--	--	S	Predicted membrane protein
F01_cb389_c16/f1p0/2195	PREDICTED: Eukaryotic translation initiation factor 6-2 OS=Arabidopsis thaliana GN=EIF6-2 PE=2 SV=1	2.333	Up	0.0085993	--	--	--	--	--	--	--	--	--	GO:0044085 cellular component biogenesis; GO:0016043 cellular component organization; GO:0034622 cellular macromolecular complex assembly; GO:0022613 ribonucleoprotein complex biogenesis; GO:0022618 ribonucleoprotein complex assembly; GO:0042254 ribosome biogenesis; GO:0042256 mature ribosome assembly; GO:0043933 macromolecular complex subunit organization; GO:0042255 ribosome assembly; GO:007182…	--	GO:0043022 ribosome binding; GO:0005488 binding; GO:0043021 ribonucleoprotein complex binding; GO:0044877 macromolecular complex binding;	pxb:103951162; eukaryotic translation initiation factor 6-2-like; K03264 translation initiation factor 6 (A)	ko03008 Ribosome biogenesis in eukaryotes;	J	Translation initiation factor 6 (eIF-6)
F01_cb8707_c4/f1p0/1774	PREDICTED: Syntaxin-22 OS=Arabidopsis thaliana GN=SYP22 PE=1 SV=1	1.925	Up	0.047781	0.766	--	0.2638	0.185	Down	0.0025817	0.466	Down	0.04506	GO:0045184 establishment of protein localization; GO:0006810 transport; GO:0046907 intracellular transport; GO:0070727 cellular macromolecule localization; GO:0051649 establishment of localization in cell; GO:0016192 vesicle-mediated transport; GO:0006886 intracellular protein transport; GO:0071702 organic substance transport; GO:0008104 protein localization; GO:0033036 macromolecule localization…	GO:0016020 membrane;	GO:0005484 SNAP receptor activity; GO:0005515 protein binding; GO:0005488 binding;	sly:101248450; syntaxin-22-like; K08488 syntaxin 7 (A)	ko04145 Phagosome; ko04130 SNARE interactions in vesicular transport;	U	SNARE protein PEP12/VAM3/Syntaxin 7/Syntaxin 17
F02_cb1381_c2/f1p0/3608	hypothetical protein AMTR_s00058p00146190 [Amborella trichopoda]	1.585	Up	0.029439	1.388	Up	0.026901	0.695	Down	0.0033789	0.793	--	0.25098	GO:0016051 carbohydrate biosynthetic process; GO:0006074 (1->3)-beta-D-glucan metabolic process; GO:0044711 single-organism biosynthetic process; GO:0006073 cellular glucan metabolic process; GO:0000271 polysaccharide biosynthetic process; GO:0044042 glucan metabolic process; GO:0044763 single-organism cellular process; GO:0044699 single-organism process; GO:0033692 cellular polysaccharide biosyn…	GO:0016020 membrane; GO:1902494 catalytic complex; GO:0044459 plasma membrane part; GO:0044425 membrane part; GO:0044464 cell part; GO:0071944 cell periphery; GO:0032991 macromolecular complex; GO:1990234 transferase complex; GO:0005623 cell; GO:0000148 1,3-beta-D-glucan synthase complex; GO:0005886 plasma membrane;	GO:0016758 transferase activity, transferring hexosyl groups; GO:0003824 catalytic activity; GO:0035251 UDP-glucosyltransferase activity; GO:0008194 UDP-glycosyltransferase activity; GO:0046527 glucosyltransferase activity; GO:0016757 transferase activity, transferring glycosyl groups; GO:0003843 1,3-beta-D-glucan synthase activity; GO:0016740 transferase activity;	--	--	M	1,3-beta-glucan synthase/callose synthase catalytic subunit
F01_cb12808_c3/f1p0/1202	unknown [Picea sitchensis]	1.942	Up	0.030703	1.794	Up	0.023703	0.715	--	0.068522	0.775	--	0.38998	GO:0009116 nucleoside metabolic process; GO:0042278 purine nucleoside metabolic process; GO:0009167 purine ribonucleoside monophosphate metabolic process; GO:0009117 nucleotide metabolic process; GO:0044699 single-organism process; GO:0046129 purine ribonucleoside biosynthetic process; GO:0009163 nucleoside biosynthetic process; GO:0009058 biosynthetic process; GO:0009156 ribonucleoside monophosp…	GO:0016020 membrane; GO:0098800 inner mitochondrial membrane protein complex; GO:0031090 organelle membrane; GO:0098796 membrane protein complex; GO:0005737 cytoplasm; GO:0032991 macromolecular complex; GO:0098798 mitochondrial protein complex; GO:0044424 intracellular part; GO:0005623 cell; GO:0044455 mitochondrial membrane part; GO:0044422 organelle part; GO:0005740 mitochondrial envelope; GO:0…	GO:0015075 ion transmembrane transporter activity; GO:0022892 substrate-specific transporter activity; GO:0015077 monovalent inorganic cation transmembrane transporter activity; GO:0022890 inorganic cation transmembrane transporter activity; GO:0015078 hydrogen ion transmembrane transporter activity; GO:0008324 cation transmembrane transporter activity; GO:0022891 substrate-specific transmembrane…	cit:102609858; hypothetical protein; K02140 F-type H+-transporting ATPase subunit g (A)	ko00190 Oxidative phosphorylation;	--	--
F02_cb15366_c1/f1p0/1153	peroxidase [Picea abies]	2.471	Up	0.0138557	1.394	Up	0.041965	0.092	Down	3.7951e-05	0.163	Down	0.00132337	GO:0008152 metabolic process; GO:0042743 hydrogen peroxide metabolic process; GO:0006950 response to stress; GO:0072593 reactive oxygen species metabolic process; GO:0055114 oxidation-reduction process; GO:0044710 single-organism metabolic process; GO:0006979 response to oxidative stress; GO:0044699 single-organism process; GO:0044248 cellular catabolic process; GO:0050896 response to stimulus; G…	--	GO:0097159 organic cyclic compound binding; GO:1901363 heterocyclic compound binding; GO:0020037 heme binding; GO:0003824 catalytic activity; GO:0005488 binding; GO:0016209 antioxidant activity; GO:0004601 peroxidase activity; GO:0046906 tetrapyrrole binding; GO:0016491 oxidoreductase activity; GO:0016684 oxidoreductase activity, acting on peroxide as acceptor;	pda:103703770; peroxidase 72-like; K00430 peroxidase [EC:1.11.1.7] (A)	ko00940 Phenylpropanoid biosynthesis; ko00360 Phenylalanine metabolism;	--	--
F02_cb15292_c2/f7p2/1093	"""PREDICTED: 25.3 kDa heat shock protein, chloroplastic OS=Arabidopsis thaliana GN=HSP25.3 PE=2 SV=1"""	30.039	Up	0.00186424	12.093	--	--	1.231	--	0.96408	3.058	--	--	--	--	--	atr:s00009p00236890; AMTR_s00009p00236890; hypothetical protein; K13993 HSP20 family protein (A)	ko04141 Protein processing in endoplasmic reticulum;	O	Molecular chaperone (small heat-shock protein Hsp26/Hsp42)
F01_cb14039_c424/f10p1/1013	unknown [Picea sitchensis]	0.452	Down	0.031616	0.495	Down	0.0063786	2.599	Up	0.00022348	2.376	Up	0.024275	GO:0008152 metabolic process;	--	GO:0016741 transferase activity, transferring one-carbon groups; GO:0008168 methyltransferase activity; GO:0003824 catalytic activity; GO:0016740 transferase activity;	--	--	R	Methyltransferase
F02_cb10881_c1/f1p0/823	"""PREDICTED: Glucan endo-1,3-beta-glucosidase, acidic isoform OS=Zea mays PE=2 SV=1"""	3.906	Up	0.0112992	--	--	--	--	--	--	--	--	--	GO:0008152 metabolic process; GO:0005975 carbohydrate metabolic process; GO:0044238 primary metabolic process; GO:0071704 organic substance metabolic process;	--	GO:0004553 hydrolase activity, hydrolyzing O-glycosyl compounds; GO:0016787 hydrolase activity; GO:0003824 catalytic activity; GO:0016798 hydrolase activity, acting on glycosyl bonds;	--	--	--	--
F02_cb5980_c5/f1p0/2355	ornithine aminotransferase [Pinus sylvestris]	0.492	Down	0.046164	--	--	--	--	--	--	--	--	--	--	--	GO:0097159 organic cyclic compound binding; GO:1901363 heterocyclic compound binding; GO:0016769 transferase activity, transferring nitrogenous groups; GO:0003824 catalytic activity; GO:0005488 binding; GO:0043167 ion binding; GO:0043168 anion binding; GO:0008483 transaminase activity; GO:0016740 transferase activity; GO:0048037 cofactor binding; GO:0030170 pyridoxal phosphate binding;	atr:s00092p00114940; AMTR_s00092p00114940; hypothetical protein; K00819 ornithine--oxo-acid transaminase [EC:2.6.1.13] (A)	ko00330 Arginine and proline metabolism;	E	Ornithine aminotransferase
F02_cb7181_c7/f1p0/2035	PREDICTED: Zeatin O-xylosyltransferase OS=Phaseolus vulgaris GN=ZOX1 PE=2 SV=1	5.894	Up	0.00015985	--	--	--	--	--	--	--	--	--	GO:0008152 metabolic process;	--	GO:0016757 transferase activity, transferring glycosyl groups; GO:0016758 transferase activity, transferring hexosyl groups; GO:0003824 catalytic activity; GO:0016740 transferase activity;	vvi:100262460; zeatin O-glucosyltransferase-like; K13495 cis-zeatin O-glucosyltransferase [EC:2.4.1.215] (A)	ko00908 Zeatin biosynthesis;	GC	UDP-glucuronosyl and UDP-glucosyl transferase
F01_cb9951_c0/f10p0/1086	PREDICTED: Peroxisomal membrane protein 11-5 OS=Oryza sativa subsp. japonica GN=PEX11-5 PE=2 SV=1	1.922	Up	0.009364	0.999	--	0.9964	1.482	Up	0.0173356	2.85	Up	0.00108419	GO:0007031 peroxisome organization; GO:0016043 cellular component organization; GO:0006996 organelle organization; GO:0048285 organelle fission; GO:0009987 cellular process; GO:0071840 cellular component organization or biogenesis; GO:0016559 peroxisome fission;	GO:0016020 membrane; GO:0043229 intracellular organelle; GO:0031903 microbody membrane; GO:0031231 intrinsic component of peroxisomal membrane; GO:0044439 peroxisomal part; GO:0098588 bounding membrane of organelle; GO:0031090 organelle membrane; GO:0005777 peroxisome; GO:0005737 cytoplasm; GO:0044446 intracellular organelle part; GO:0031224 intrinsic component of membrane; GO:0044438 microbody p…	--	--	--	U	Peroxisomal biogenesis protein (peroxin)
F01_cb9488_c1/f1p0/1899	hypothetical protein AMTR_s00068p00157910 [Amborella trichopoda]	1.694	Up	0.034635	--	--	--	--	--	--	--	--	--	--	--	--	--	--	--	--
F01_cb15698_c1/f1p0/734	unknown [Picea sitchensis]	1.887	Up	0.0161791	2.43	Up	0.021082	0.572	Down	0.03542	0.444	Down	0.021381	--	--	--	--	--	--	--
F02_cb10606_c2/f1p0/1428	PREDICTED: solute carrier family 25 member 44-like [Prunus mume]	1.835	Up	0.036762	1.264	--	0.21668	0.448	Down	0.0055352	0.65	--	0.20266	GO:0006810 transport; GO:0055085 transmembrane transport; GO:0051179 localization; GO:0051234 establishment of localization;	--	--	--	--	C	Predicted mitochondrial carrier protein
F01_cb5643_c4/f1p0/4196	hypothetical protein AMTR_s00092p00160980 [Amborella trichopoda]	1.483	Up	0.0117833	--	--	--	--	--	--	--	--	--	GO:0016310 phosphorylation; GO:0044267 cellular protein metabolic process; GO:0044238 primary metabolic process; GO:0044237 cellular metabolic process; GO:0006796 phosphate-containing compound metabolic process; GO:0071704 organic substance metabolic process; GO:0008152 metabolic process; GO:0006468 protein phosphorylation; GO:0006793 phosphorus metabolic process; GO:0044260 cellular macromolecul…	--	GO:0005524 ATP binding; GO:1901265 nucleoside phosphate binding; GO:0016773 phosphotransferase activity, alcohol group as acceptor; GO:0001882 nucleoside binding; GO:0043167 ion binding; GO:0004672 protein kinase activity; GO:0000166 nucleotide binding; GO:0097159 organic cyclic compound binding; GO:1901363 heterocyclic compound binding; GO:0032549 ribonucleoside binding; GO:0097367 carbohydrate …	--	--	T	Serine/threonine protein kinase
F01_cb5000_c21284/f2p0/2217	PREDICTED: Lipase-like PAD4 OS=Arabidopsis thaliana GN=PAD4 PE=1 SV=1	0.352	Down	0.032483	0.481	Down	0.024076	1.539	--	0.127158	1.126	--	0.6037	GO:0044699 single-organism process; GO:0008152 metabolic process; GO:0044238 primary metabolic process; GO:0044710 single-organism metabolic process; GO:0006629 lipid metabolic process; GO:0071704 organic substance metabolic process;	--	--	--	--	--	--
F02_cb3770_c13/f1p0/2552	hypothetical protein AMTR_s00023p00059770 [Amborella trichopoda]	0.675	Down	0.027276	0.65	--	0.190841	0.861	--	0.4603	0.894	--	0.34706	--	--	GO:0008289 lipid binding; GO:0043168 anion binding; GO:0005488 binding; GO:0035091 phosphatidylinositol binding; GO:0005543 phospholipid binding; GO:0043167 ion binding;	--	--	U	Membrane coat complex Retromer, subunit VPS5/SNX1, Sorting nexins, and related PX domain-containing proteins
F01_cb11023_c15/f1p0/1083	RecName: Full=60S ribosomal protein L13a [Picea mariana]	0.414	Down	0.0098982	1.06	--	0.88772	3.304	Up	0.0049212	1.292	--	0.30032	GO:0006518 peptide metabolic process; GO:0043043 peptide biosynthetic process; GO:0044267 cellular protein metabolic process; GO:0006807 nitrogen compound metabolic process; GO:0009058 biosynthetic process; GO:0043603 cellular amide metabolic process; GO:0044238 primary metabolic process; GO:1901566 organonitrogen compound biosynthetic process; GO:1901576 organic substance biosynthetic process; G…	GO:0005840 ribosome; GO:0043229 intracellular organelle; GO:0043232 intracellular non-membrane-bounded organelle; GO:0044446 intracellular organelle part; GO:0005737 cytoplasm; GO:0032991 macromolecular complex; GO:0044424 intracellular part; GO:0005623 cell; GO:0044422 organelle part; GO:0043228 non-membrane-bounded organelle; GO:0043226 organelle; GO:0015934 large ribosomal subunit; GO:0044391 …	GO:0003735 structural constituent of ribosome; GO:0005198 structural molecule activity;	atr:s00089p00040540; AMTR_s00089p00040540; hypothetical protein; K02872 large subunit ribosomal protein L13Ae (A)	ko03010 Ribosome;	J	60S ribosomal protein L13a
F01_cb11555_c0/f2p0/1570	hypothetical protein SELMODRAFT_131287 [Selaginella moellendorffii]	1.961	Up	0.021521	1.748	Up	0.00108339	2.973	Up	0.000158186	3.335	Up	0.0027235	--	--	GO:0097159 organic cyclic compound binding; GO:1901363 heterocyclic compound binding; GO:0003824 catalytic activity; GO:0005488 binding; GO:0043167 ion binding; GO:0043168 anion binding; GO:0048037 cofactor binding; GO:0030170 pyridoxal phosphate binding;	--	--	--	--
F01_cb2420_c3/f1p1/2974	hypothetical protein AMTR_s00111p00128560 [Amborella trichopoda]	1.266	Up	0.047023	--	--	--	--	--	--	--	--	--	--	--	--	--	--	S	Uncharacterized conserved protein, contains GRAM domain
F02_cb4317_c1/f4p1/2500	hypothetical protein JCGZ_15598 [Jatropha curcas]	1.216	Up	0.040615	0.971	--	0.76648	0.612	Down	0.048301	0.766	Down	0.031695	--	--	GO:0016741 transferase activity, transferring one-carbon groups; GO:0008168 methyltransferase activity; GO:0003824 catalytic activity; GO:0016740 transferase activity;	--	--	--	--
F01_cb3563_c9/f1p0/2267	hypothetical protein AMTR_s00051p00166200 [Amborella trichopoda]	0.711	Down	0.039376	1.052	--	0.66008	1.277	--	0.068084	0.863	--	0.32448	GO:0044267 cellular protein metabolic process; GO:0071702 organic substance transport; GO:0044238 primary metabolic process; GO:0044237 cellular metabolic process; GO:0015031 protein transport; GO:0051234 establishment of localization; GO:0071704 organic substance metabolic process; GO:0006810 transport; GO:0045184 establishment of protein localization; GO:0008152 metabolic process; GO:0044260 ce…	--	--	atr:s00051p00166200; AMTR_s00051p00166200; hypothetical protein; K12183 ESCRT-I complex subunit TSG101 (A)	ko04144 Endocytosis;	OU	Vacuolar sorting protein/ubiquitin receptor VPS23
F02_cb10060_c3/f1p0/955	hypothetical protein SELMODRAFT_96367 [Selaginella moellendorffii]	1.641	Up	0.034981	2.243	Up	0.021122	0.939	--	0.69228	0.687	--	0.114605	GO:0043632 modification-dependent macromolecule catabolic process; GO:0044265 cellular macromolecule catabolic process; GO:0051603 proteolysis involved in cellular protein catabolic process; GO:0044257 cellular protein catabolic process; GO:0019941 modification-dependent protein catabolic process; GO:0044267 cellular protein metabolic process; GO:0006511 ubiquitin-dependent protein catabolic proc…	--	--	smo:SELMODRAFT_106838; hypothetical protein; K03872 transcription elongation factor B, polypeptide 1 (A)	ko04120 Ubiquitin mediated proteolysis;	K	RNA polymerase II transcription elongation factor Elongin/SIII, subunit elongin C
F02_cb4746_c1/f1p1/2614	"""PREDICTED: glucose-6-phosphate 1-dehydrogenase 4, chloroplastic [Nelumbo nucifera]"""	0.422	Down	0.023238	--	--	--	--	--	--	--	--	--	GO:0006006 glucose metabolic process; GO:0044723 single-organism carbohydrate metabolic process; GO:0008152 metabolic process; GO:0055114 oxidation-reduction process; GO:0044710 single-organism metabolic process; GO:0044281 small molecule metabolic process; GO:0005996 monosaccharide metabolic process; GO:0044699 single-organism process; GO:0044238 primary metabolic process; GO:0005975 carbohydrat…	--	GO:0016614 oxidoreductase activity, acting on CH-OH group of donors; GO:0097159 organic cyclic compound binding; GO:1901363 heterocyclic compound binding; GO:0016616 oxidoreductase activity, acting on the CH-OH group of donors, NAD or NADP as acceptor; GO:1901265 nucleoside phosphate binding; GO:0003824 catalytic activity; GO:0005488 binding; GO:0004345 glucose-6-phosphate dehydrogenase activity;…	atr:s00049p00097260; AMTR_s00049p00097260; hypothetical protein; K00036 glucose-6-phosphate 1-dehydrogenase [EC:1.1.1.49] (A)	ko00030 Pentose phosphate pathway; ko01200 Carbon metabolism; ko00480 Glutathione metabolism;	G	Glucose-6-phosphate 1-dehydrogenase
F02_cb10230_c11/f1p1/975	PREDICTED: Elongation factor 1-delta OS=Pimpinella brachycarpa PE=2 SV=3	4.028	Up	0.0043837	--	--	--	--	--	--	--	--	--	GO:0006518 peptide metabolic process; GO:0006414 translational elongation; GO:0043043 peptide biosynthetic process; GO:0044267 cellular protein metabolic process; GO:0006807 nitrogen compound metabolic process; GO:0009058 biosynthetic process; GO:0043603 cellular amide metabolic process; GO:0044238 primary metabolic process; GO:1901566 organonitrogen compound biosynthetic process; GO:1901576 orga…	GO:0044464 cell part; GO:0005622 intracellular; GO:0005737 cytoplasm; GO:0032991 macromolecular complex; GO:0044424 intracellular part; GO:0043234 protein complex; GO:0005623 cell; GO:0044444 cytoplasmic part; GO:0005853 eukaryotic translation elongation factor 1 complex;	GO:0097159 organic cyclic compound binding; GO:1901363 heterocyclic compound binding; GO:0003723 RNA binding; GO:0008135 translation factor activity, RNA binding; GO:0003746 translation elongation factor activity; GO:0005488 binding; GO:0003676 nucleic acid binding;	--	--	K	Elongation factor 1 beta/delta chain
F01_cb10803_c8/f1p0/865	PREDICTED: Acid phosphatase 1 OS=Solanum lycopersicum GN=APS1 PE=2 SV=1	1.905	Up	0.027537	1.472	Up	0.048919	0.563	Down	0.024436	0.729	--	0.108084	--	--	--	--	--	--	--
F02_cb1102_c9/f1p0/4343	PREDICTED: ATP-dependent zinc metalloprotease FtsH [Nelumbo nucifera]	1.752	Up	0.023657	--	--	--	--	--	--	--	--	--	GO:0006508 proteolysis; GO:0008152 metabolic process; GO:0043170 macromolecule metabolic process; GO:0019538 protein metabolic process; GO:0044238 primary metabolic process; GO:0071704 organic substance metabolic process;	--	GO:0004222 metalloendopeptidase activity; GO:0008233 peptidase activity; GO:0005524 ATP binding; GO:1901265 nucleoside phosphate binding; GO:0001882 nucleoside binding; GO:0043167 ion binding; GO:0008237 metallopeptidase activity; GO:0016787 hydrolase activity; GO:0000166 nucleotide binding; GO:0004175 endopeptidase activity; GO:0097159 organic cyclic compound binding; GO:1901363 heterocyclic com…	--	--	O	AAA+-type ATPase containing the peptidase M41 domain
F02_cb12524_c0/f4p1/1612	"""PREDICTED: DNA repair protein recA homolog 1, chloroplastic [Nelumbo nucifera]"""	0.61	Down	0.0132604	1.236	Up	0.00197666	2.215	Up	0.00105644	1.094	--	0.27558	GO:0033554 cellular response to stress; GO:0051716 cellular response to stimulus; GO:0006725 cellular aromatic compound metabolic process; GO:0006950 response to stress; GO:0006259 DNA metabolic process; GO:1901360 organic cyclic compound metabolic process; GO:0006807 nitrogen compound metabolic process; GO:0044238 primary metabolic process; GO:0050896 response to stimulus; GO:0044237 cellular me…	--	GO:0003677 DNA binding; GO:0005524 ATP binding; GO:1901265 nucleoside phosphate binding; GO:0001882 nucleoside binding; GO:0043167 ion binding; GO:0016817 hydrolase activity, acting on acid anhydrides; GO:0003697 single-stranded DNA binding; GO:0016787 hydrolase activity; GO:0000166 nucleotide binding; GO:0017111 nucleoside-triphosphatase activity; GO:0016887 ATPase activity; GO:1901363 heterocyc…	pda:103696257; DNA repair protein recA homolog 1, chloroplastic; K03553 recombination protein RecA (A)	ko03440 Homologous recombination;	L	DNA repair protein RAD51/RHP55
F01_cb467_c2/f4p0/2978	hypothetical protein AMTR_s00008p00163370 [Amborella trichopoda]	0.379	Down	0.02482	0.927	--	0.69434	4.19	Up	1.87378e-05	1.711	--	0.117239	GO:0045184 establishment of protein localization; GO:0006810 transport; GO:0046907 intracellular transport; GO:0070727 cellular macromolecule localization; GO:0051649 establishment of localization in cell; GO:0016192 vesicle-mediated transport; GO:0006886 intracellular protein transport; GO:0048193 Golgi vesicle transport; GO:0071702 organic substance transport; GO:0008104 protein localization; G…	GO:0016020 membrane; GO:0030658 transport vesicle membrane; GO:0031410 cytoplasmic vesicle; GO:0031090 organelle membrane; GO:0098796 membrane protein complex; GO:0005737 cytoplasm; GO:0031982 vesicle; GO:0044433 cytoplasmic vesicle part; GO:0032991 macromolecular complex; GO:0044424 intracellular part; GO:0030120 vesicle coat; GO:0005623 cell; GO:0044422 organelle part; GO:0030662 coated vesicle…	GO:0043169 cation binding; GO:0046872 metal ion binding; GO:0008270 zinc ion binding; GO:0046914 transition metal ion binding; GO:0005488 binding; GO:0043167 ion binding;	ppp:PHYPADRAFT_212135; hypothetical protein; K14006 protein transport protein SEC23 (A)	ko04141 Protein processing in endoplasmic reticulum;	U	Vesicle coat complex COPII, subunit SEC23
F02_cb9735_c66113/f1p0/3128	predicted protein [Physcomitrella patens]	0.67	Down	0.0153244	0.366	Down	0.0053573	0.647	--	0.052162	1.184	--	0.26062	--	--	--	--	--	--	--
F01_cb14139_c2/f1p0/683	PREDICTED: Early nodulin-93 OS=Glycine max PE=2 SV=1	3.055	Up	0.042557	--	--	--	--	--	--	--	--	--	--	--	--	--	--	--	--
F01_cb5422_c14/f1p1/2091	hypothetical protein JCGZ_18363 [Jatropha curcas]	1.271	Up	0.049942	--	--	--	--	--	--	--	--	--	--	--	--	--	--	O	Molecular chaperone (DnaJ superfamily)
F01_cb8556_c1/f2p0/1766	hypothetical protein AMTR_s00003p00270920 [Amborella trichopoda]	1.853	Up	0.0222	--	--	--	--	--	--	--	--	--	--	--	--	--	--	U	VAMP-associated protein involved in inositol metabolism
F01_cb10591_c10/f1p3/1165	PREDICTED: Probable phospholipid hydroperoxide glutathione peroxidase OS=Citrus sinensis GN=CSA PE=1 SV=1	0.503	Down	0.0079791	0.493	Down	0.000197258	0.737	Down	0.038464	0.751	--	0.070256	GO:0008152 metabolic process; GO:0006950 response to stress; GO:0055114 oxidation-reduction process; GO:0044710 single-organism metabolic process; GO:0006979 response to oxidative stress; GO:0044699 single-organism process; GO:0050896 response to stimulus;	--	GO:0016209 antioxidant activity; GO:0004601 peroxidase activity; GO:0004602 glutathione peroxidase activity; GO:0003824 catalytic activity; GO:0016491 oxidoreductase activity; GO:0016684 oxidoreductase activity, acting on peroxide as acceptor;	atr:s00009p00255140; AMTR_s00009p00255140; hypothetical protein; K00432 glutathione peroxidase [EC:1.11.1.9] (A)	ko00590 Arachidonic acid metabolism; ko00480 Glutathione metabolism;	O	Glutathione peroxidase
F02_cb8531_c3/f1p0/2111	PREDICTED: WAT1-related protein At4g19185 OS=Arabidopsis thaliana GN=At4g19185 PE=2 SV=1	1.912	Up	0.043521	1.63	--	0.089701	0.439	Down	0.025478	0.515	Down	0.026722	--	GO:0031224 intrinsic component of membrane; GO:0016020 membrane; GO:0016021 integral component of membrane; GO:0044425 membrane part;	--	--	--	--	--
F01_cb14039_c5036/f2p0/1125	unknown [Picea sitchensis]	0.559	Down	0.047497	1.214	--	0.2389	3.053	Up	0.00070033	1.406	--	0.154299	GO:0008152 metabolic process;	--	GO:0016741 transferase activity, transferring one-carbon groups; GO:0008168 methyltransferase activity; GO:0003824 catalytic activity; GO:0016740 transferase activity;	--	--	R	Methyltransferase
F02_cb4771_c17/f1p0/1110	PREDICTED: Reticulon-like protein B2 OS=Arabidopsis thaliana GN=RTNLB2 PE=1 SV=1	0.536	Down	0.021844	--	--	--	--	--	--	--	--	--	--	--	--	--	--	U	Reticulon
F02_cb10014_c3/f2p2/843	PREDICTED: 40S ribosomal protein S16 OS=Gossypium hirsutum GN=RPS16 PE=2 SV=1	0.425	Down	0.048996	0.777	--	0.30158	2.63	--	0.054477	1.437	--	0.148244	GO:0006518 peptide metabolic process; GO:0043043 peptide biosynthetic process; GO:0044267 cellular protein metabolic process; GO:0006807 nitrogen compound metabolic process; GO:0009058 biosynthetic process; GO:0043603 cellular amide metabolic process; GO:0044238 primary metabolic process; GO:1901566 organonitrogen compound biosynthetic process; GO:1901576 organic substance biosynthetic process; G…	GO:0005840 ribosome; GO:0043226 organelle; GO:0043229 intracellular organelle; GO:0043232 intracellular non-membrane-bounded organelle; GO:0044464 cell part; GO:0005622 intracellular; GO:0005737 cytoplasm; GO:0032991 macromolecular complex; GO:0044424 intracellular part; GO:1990904 ribonucleoprotein complex; GO:0005623 cell; GO:0030529 intracellular ribonucleoprotein complex; GO:0044444 cytoplasm…	GO:0003735 structural constituent of ribosome; GO:0005198 structural molecule activity;	pper:PRUPE_ppa012996mg; hypothetical protein; K02960 small subunit ribosomal protein S16e (A)	ko03010 Ribosome;	J	40S ribosomal protein S16
F01_cb12604_c48/f3p0/1085	PREDICTED: Short-chain dehydrogenase reductase 2a OS=Arabidopsis thaliana GN=SDR2a PE=3 SV=1	2.065	Up	0.031018	1.051	--	0.7316	1.661	--	0.23462	3.265	--	0.112737	--	--	GO:0003824 catalytic activity; GO:0016491 oxidoreductase activity;	--	--	R	Reductases with broad range of substrate specificities
F01_cb15185_c1/f1p0/990	PREDICTED: peptidyl-prolyl cis-trans isomerase CYP21-1 [Nelumbo nucifera]	1.535	Up	0.047918	1.199	--	0.26402	0.589	Down	0.04658	0.754	Down	0.0156401	GO:0044267 cellular protein metabolic process; GO:0044238 primary metabolic process; GO:0018208 peptidyl-proline modification; GO:0000413 protein peptidyl-prolyl isomerization; GO:0044237 cellular metabolic process; GO:0071704 organic substance metabolic process; GO:0006457 protein folding; GO:0018193 peptidyl-amino acid modification; GO:0008152 metabolic process; GO:0044260 cellular macromolecul…	--	GO:0003755 peptidyl-prolyl cis-trans isomerase activity; GO:0016853 isomerase activity; GO:0003824 catalytic activity; GO:0016859 cis-trans isomerase activity;	--	--	O	Cyclophilin type peptidyl-prolyl cis-trans isomerase
F01_cb11126_c144/f1p2/1322	PREDICTED: polyubiquitin [Eucalyptus grandis]	2.451	Up	0.0061212	2.478	Up	0.0049229	0.578	Down	0.0182963	0.572	Down	0.042576	--	--	GO:0005515 protein binding; GO:0005488 binding;	--	--	OR	Ubiquitin and ubiquitin-like proteins
F01_cb7527_c3/f1p1/1934	PREDICTED: Serine carboxypeptidase-like 26 OS=Arabidopsis thaliana GN=SCPL26 PE=2 SV=1	0.263	Down	0.02468	0.275	Down	4.3301e-05	0.44	Down	0.0126037	0.42	--	0.137476	GO:0006508 proteolysis; GO:0008152 metabolic process; GO:0043170 macromolecule metabolic process; GO:0019538 protein metabolic process; GO:0044238 primary metabolic process; GO:0071704 organic substance metabolic process;	--	GO:0004180 carboxypeptidase activity; GO:0008233 peptidase activity; GO:0008238 exopeptidase activity; GO:0003824 catalytic activity; GO:0017171 serine hydrolase activity; GO:0008236 serine-type peptidase activity; GO:0070011 peptidase activity, acting on L-amino acid peptides; GO:0016787 hydrolase activity; GO:0004185 serine-type carboxypeptidase activity; GO:0070008 serine-type exopeptidase act…	--	--	OE	Serine carboxypeptidases (lysosomal cathepsin A)
F02_cb6_c0/f2p0/4107	PREDICTED: alpha-mannosidase 2x [Vitis vinifera]	1.311	Up	0.0088224	1.327	Up	0.0187623	0.917	--	0.2528	0.906	--	0.2038	GO:0044723 single-organism carbohydrate metabolic process; GO:0008152 metabolic process; GO:0044710 single-organism metabolic process; GO:0044281 small molecule metabolic process; GO:0005996 monosaccharide metabolic process; GO:0006013 mannose metabolic process; GO:0044699 single-organism process; GO:0005975 carbohydrate metabolic process; GO:0044238 primary metabolic process; GO:0019318 hexose m…	--	GO:0015923 mannosidase activity; GO:0046914 transition metal ion binding; GO:0003824 catalytic activity; GO:0005488 binding; GO:0043167 ion binding; GO:0004559 alpha-mannosidase activity; GO:0016798 hydrolase activity, acting on glycosyl bonds; GO:0043169 cation binding; GO:0046872 metal ion binding; GO:0004553 hydrolase activity, hydrolyzing O-glycosyl compounds; GO:0030246 carbohydrate binding;…	vvi:100243903; MAN2A2; alpha-mannosidase 2x; K01231 alpha-mannosidase II [EC:3.2.1.114] (A)	ko00510 N-Glycan biosynthesis;	G	Glycosyl hydrolase, family 38 - alpha-mannosidase
F02_cb13213_c32/f4p1/746	calcium binding protein [Pinus taeda]	2.251	Up	0.028722	2.718	--	0.05866	0.394	Down	0.048677	0.327	Down	0.0077824	--	--	GO:0043169 cation binding; GO:0046872 metal ion binding; GO:0005509 calcium ion binding; GO:0005488 binding; GO:0043167 ion binding;	pda:103709704; probable calcium-binding protein CML27; K13448 calcium-binding protein CML (A)	ko04626 Plant-pathogen interaction;	T	Calmodulin and related proteins (EF-Hand superfamily)
F02_cb12933_c3/f1p0/975	PREDICTED: Ricin B-like lectin EULS3 OS=Arabidopsis thaliana GN=EULS3 PE=1 SV=1	0.296	Down	0.028837	0.596	--	0.71548	0.521	--	0.2214	0.258	--	0.063215	--	--	--	--	--	--	--
F01_cb11992_c7/f1p0/1271	PREDICTED: Peroxidase 40 OS=Arabidopsis thaliana GN=PER40 PE=2 SV=2	7.191	Up	0.0176358	1.188	--	0.5434	0.2	Down	0.040744	1.213	--	0.96994	GO:0008152 metabolic process; GO:0042743 hydrogen peroxide metabolic process; GO:0006950 response to stress; GO:0072593 reactive oxygen species metabolic process; GO:0055114 oxidation-reduction process; GO:0044710 single-organism metabolic process; GO:0006979 response to oxidative stress; GO:0044699 single-organism process; GO:0044248 cellular catabolic process; GO:0050896 response to stimulus; G…	--	GO:0097159 organic cyclic compound binding; GO:1901363 heterocyclic compound binding; GO:0020037 heme binding; GO:0003824 catalytic activity; GO:0005488 binding; GO:0016209 antioxidant activity; GO:0004601 peroxidase activity; GO:0046906 tetrapyrrole binding; GO:0016491 oxidoreductase activity; GO:0016684 oxidoreductase activity, acting on peroxide as acceptor;	pda:103703770; peroxidase 72-like; K00430 peroxidase [EC:1.11.1.7] (A)	ko00940 Phenylpropanoid biosynthesis; ko00360 Phenylalanine metabolism;	--	--
F02_cb3113_c10/f1p1/3039	PREDICTED: protein FAM188A-like [Nelumbo nucifera]	0.664	Down	0.0105959	0.769	--	0.192585	1.219	--	0.44218	1.053	--	0.63154	--	--	--	--	--	S	Uncharacterized conserved protein
F02_cb7042_c20/f2p2/1901	"""PREDICTED: Dihydrolipoyl dehydrogenase 1, mitochondrial OS=Arabidopsis thaliana GN=LPD1 PE=1 SV=2"""	3.178	Up	0.00136275	8.537	Up	0.00101988	6.22	Up	0.00021502	2.316	Up	0.0163428	GO:0050794 regulation of cellular process; GO:0042592 homeostatic process; GO:0065008 regulation of biological quality; GO:0008152 metabolic process; GO:0050789 regulation of biological process; GO:0055114 oxidation-reduction process; GO:0044710 single-organism metabolic process; GO:0045454 cell redox homeostasis; GO:0044763 single-organism cellular process; GO:0019725 cellular homeostasis; GO:00…	--	GO:0004148 dihydrolipoyl dehydrogenase activity; GO:0016651 oxidoreductase activity, acting on NAD(P)H; GO:1901265 nucleoside phosphate binding; GO:0050660 flavin adenine dinucleotide binding; GO:0043167 ion binding; GO:0000166 nucleotide binding; GO:0048037 cofactor binding; GO:0016668 oxidoreductase activity, acting on a sulfur group of donors, NAD(P) as acceptor; GO:0016491 oxidoreductase acti…	pda:103723723; dihydrolipoyl dehydrogenase, mitochondrial-like; K00382 dihydrolipoamide dehydrogenase [EC:1.8.1.4] (A)	ko00020 Citrate cycle (TCA cycle); ko00280 Valine, leucine and isoleucine degradation; ko00010 Glycolysis / Gluconeogenesis; ko01200 Carbon metabolism; ko00260 Glycine, serine and threonine metabolism; ko00620 Pyruvate metabolism;	C	Dihydrolipoamide dehydrogenase
F02_cb3289_c22/f1p0/2300	hypothetical protein AMTR_s00129p00121180 [Amborella trichopoda]	4.898	Up	0.0134163	6.248	Up	0.00029893	0.135	Down	1.56105e-05	0.106	Down	0.00068176	GO:0006508 proteolysis; GO:0008152 metabolic process; GO:0043170 macromolecule metabolic process; GO:0019538 protein metabolic process; GO:0044238 primary metabolic process; GO:0071704 organic substance metabolic process;	--	GO:0004252 serine-type endopeptidase activity; GO:0004175 endopeptidase activity; GO:0008233 peptidase activity; GO:0003824 catalytic activity; GO:0017171 serine hydrolase activity; GO:0008236 serine-type peptidase activity; GO:0070011 peptidase activity, acting on L-amino acid peptides; GO:0016787 hydrolase activity;	--	--	--	--
F01_cb13428_c6/f1p0/886	thaumatin-like protein [Pinus monticola]	16.626	Up	0.00140252	9.791	Up	0.0042557	0.054	Down	0.00047774	0.091	Down	0.0106633	--	--	--	--	--	--	--
F01_cb7149_c3/f1p0/1570	PREDICTED: GDSL esterase/lipase At4g01130 OS=Arabidopsis thaliana GN=At4g01130 PE=2 SV=1	2.325	Up	0.043598	1.203	--	0.090396	0.114	Down	5.9408e-05	0.22	Down	0.043224	--	--	GO:0016787 hydrolase activity; GO:0003824 catalytic activity; GO:0016788 hydrolase activity, acting on ester bonds;	--	--	--	--
F01_cb6217_c6/f1p0/2151	PREDICTED: 11S globulin seed storage protein 2 OS=Sesamum indicum PE=2 SV=1	0.703	Down	0.0109976	0.636	Down	0.0034043	1.313	Up	0.0164553	1.453	Up	0.0101834	--	--	GO:0045735 nutrient reservoir activity;	--	--	--	--
F02_cb13739_c2/f1p0/851	unknown [Picea sitchensis]	2.043	Up	0.030362	--	--	--	--	--	--	--	--	--	--	--	--	--	--	--	--
F02_cb8264_c9/f1p0/2144	"""PREDICTED: Glyceraldehyde-3-phosphate dehydrogenase GAPB, chloroplastic OS=Arabidopsis thaliana GN=GAPB PE=1 SV=2"""	0.231	Down	0.039035	0.606	--	0.62866	1.082	--	0.98776	0.412	--	0.20394	GO:0044699 single-organism process; GO:0008152 metabolic process; GO:0055114 oxidation-reduction process; GO:0044710 single-organism metabolic process;	--	GO:0016620 oxidoreductase activity, acting on the aldehyde or oxo group of donors, NAD or NADP as acceptor; GO:0003824 catalytic activity; GO:0016491 oxidoreductase activity; GO:0016903 oxidoreductase activity, acting on the aldehyde or oxo group of donors;	vvi:100259814; glyceraldehyde-3-phosphate dehydrogenase B, chloroplastic; K05298 glyceraldehyde-3-phosphate dehydrogenase (NADP+) (phosphorylating) [EC:1.2.1.13] (A)	ko01200 Carbon metabolism; ko00710 Carbon fixation in photosynthetic organisms;	G	Glyceraldehyde 3-phosphate dehydrogenase
F02_cb9569_c9/f8p1/1395	PREDICTED: Probable aldo-keto reductase 2 OS=Oryza sativa subsp. japonica GN=Os04g0338000 PE=2 SV=2	3.191	Up	0.04164	3.444	Up	0.00040392	6.737	Up	0.00161787	6.241	Up	0.029964	--	--	--	--	--	C	Voltage-gated shaker-like K+ channel, subunit beta/KCNAB
F02_cb14801_c3/f1p0/1323	PREDICTED: Eukaryotic translation initiation factor 3 subunit F OS=Arabidopsis thaliana GN=TIF3F1 PE=1 SV=1	1.323	Up	0.022376	1.43	--	0.174545	1.156	--	0.58384	1.069	--	0.53002	--	GO:0044464 cell part; GO:0005622 intracellular; GO:0005737 cytoplasm; GO:0032991 macromolecular complex; GO:0044424 intracellular part; GO:0043234 protein complex; GO:0005623 cell; GO:0044444 cytoplasmic part; GO:0005852 eukaryotic translation initiation factor 3 complex;	GO:0097159 organic cyclic compound binding; GO:1901363 heterocyclic compound binding; GO:0003723 RNA binding; GO:0008135 translation factor activity, RNA binding; GO:0005488 binding; GO:0003676 nucleic acid binding; GO:0003743 translation initiation factor activity; GO:0005515 protein binding;	smo:SELMODRAFT_127524; hypothetical protein; K03249 translation initiation factor 3 subunit F (A)	ko03013 RNA transport;	J	Translation initiation factor 3, subunit f (eIF-3f)
F01_cb4779_c2/f1p0/3107	hypothetical protein AMTR_s00176p00021290 [Amborella trichopoda]	0.151	Down	0.042096	--	--	--	--	--	--	--	--	--	GO:0008152 metabolic process; GO:0010467 gene expression; GO:0006508 proteolysis; GO:0016485 protein processing; GO:0043170 macromolecule metabolic process; GO:0019538 protein metabolic process; GO:0044238 primary metabolic process; GO:0051604 protein maturation; GO:0071704 organic substance metabolic process;	GO:0031224 intrinsic component of membrane; GO:0016020 membrane; GO:0016021 integral component of membrane; GO:0044425 membrane part;	--	--	--	TO	Transmembrane glycoprotein nicastrin
F01_cb12997_c4/f1p0/1616	unknown [Picea sitchensis]	1.342	Up	0.043017	1.323	--	0.14318	1.3	--	0.109739	1.318	--	0.089496	--	--	--	--	--	--	--
F02_cb2102_c12/f1p1/8113	predicted protein [Physcomitrella patens]	1.727	Up	0.024622	1.054	--	0.6938	0.396	Down	0.00145734	0.65	--	0.068601	--	GO:0031224 intrinsic component of membrane; GO:0016020 membrane; GO:0016021 integral component of membrane; GO:0044425 membrane part;	GO:0005515 protein binding; GO:0005488 binding;	--	--	U	Vacuolar protein sorting-associated protein
F02_cb3616_c0/f1p0/2901	PREDICTED: Pentatricopeptide repeat-containing protein At1g19720 OS=Arabidopsis thaliana GN=DYW7 PE=2 SV=1	2.218	Up	0.0062769	--	--	--	--	--	--	--	--	--	--	--	GO:0005515 protein binding; GO:0005488 binding;	--	--	R	FOG: PPR repeat
F02_cb7310_c23/f13p1/2027	"""PREDICTED: Dihydrolipoyllysine-residue succinyltransferase component of 2-oxoglutarate dehydrogenase complex 2, mitochondrial OS=Arabidopsis thaliana GN=At4g26910 PE=1 SV=2"""	5.159	Up	0.000119188	6.633	Up	0.00149787	0.496	Down	0.029735	0.385	Down	0.0022823	GO:0072350 tricarboxylic acid metabolic process; GO:0055114 oxidation-reduction process; GO:0044281 small molecule metabolic process; GO:0044763 single-organism cellular process; GO:0006099 tricarboxylic acid cycle; GO:0044699 single-organism process; GO:0044238 primary metabolic process; GO:0045333 cellular respiration; GO:0044237 cellular metabolic process; GO:0071704 organic substance metaboli…	GO:1902494 catalytic complex; GO:0044464 cell part; GO:0005622 intracellular; GO:1990204 oxidoreductase complex; GO:0005737 cytoplasm; GO:0032991 macromolecular complex; GO:0044424 intracellular part; GO:0045252 oxoglutarate dehydrogenase complex; GO:1990234 transferase complex; GO:0043234 protein complex; GO:0005623 cell; GO:0045239 tricarboxylic acid cycle enzyme complex; GO:0044444 cytoplasmic…	GO:0016417 S-acyltransferase activity; GO:0016751 S-succinyltransferase activity; GO:0016746 transferase activity, transferring acyl groups; GO:0004149 dihydrolipoyllysine-residue succinyltransferase activity; GO:0003824 catalytic activity; GO:0016748 succinyltransferase activity; GO:0016740 transferase activity; GO:0016747 transferase activity, transferring acyl groups other than amino-acyl grou…	mus:103974523; dihydrolipoyllysine-residue succinyltransferase component of 2-oxoglutarate dehydrogenase complex 2, mitochondrial-like isoform X1; K00658 2-oxoglutarate dehydrogenase E2 component (dihydrolipoamide succinyltransferase) [EC:2.3.1.61] (A)	ko00020 Citrate cycle (TCA cycle); ko00310 Lysine degradation; ko01200 Carbon metabolism;	C	Dihydrolipoamide succinyltransferase (2-oxoglutarate dehydrogenase, E2 subunit)
F01_cb15308_c7/f1p0/1128	"""PREDICTED: heme-binding-like protein At3g10130, chloroplastic [Nelumbo nucifera]"""	2.932	Up	0.00041777	2.593	Up	0.044522	1.264	--	0.64588	1.43	Up	0.030018	--	--	--	--	--	--	--
F02_cb5449_c23/f1p0/1592	PREDICTED: Anthocyanidin 3-O-glucosyltransferase OS=Petunia hybrida GN=RT PE=2 SV=1	3.908	Up	0.00066054	--	--	--	--	--	--	--	--	--	GO:0008152 metabolic process;	--	GO:0016757 transferase activity, transferring glycosyl groups; GO:0016758 transferase activity, transferring hexosyl groups; GO:0003824 catalytic activity; GO:0016740 transferase activity;	--	--	GC	UDP-glucuronosyl and UDP-glucosyl transferase
F02_cb1415_c44/f4p1/3460	PREDICTED: probable cyclic nucleotide-gated ion channel 5 isoform X1 [Vitis vinifera]	1.787	Up	0.0041191	--	--	--	--	--	--	--	--	--	GO:0006810 transport; GO:0055085 transmembrane transport; GO:0006813 potassium ion transport; GO:0006812 cation transport; GO:0006811 ion transport; GO:0030001 metal ion transport; GO:0051179 localization; GO:0015672 monovalent inorganic cation transport; GO:0051234 establishment of localization;	GO:0016020 membrane;	GO:0015075 ion transmembrane transporter activity; GO:0022803 passive transmembrane transporter activity; GO:0022892 substrate-specific transporter activity; GO:0005515 protein binding; GO:0015077 monovalent inorganic cation transmembrane transporter activity; GO:0015267 channel activity; GO:0015079 potassium ion transmembrane transporter activity; GO:0022891 substrate-specific transmembrane tran…	vvi:100246671; cyclic nucleotide gated channel-like; K05391 cyclic nucleotide gated channel, other eukaryote (A)	ko04626 Plant-pathogen interaction;	PT	K+-channel ERG and related proteins, contain PAS/PAC sensor domain
F01_cb15065_c0/f3p0/790	PREDICTED: uncharacterized protein LOC104587525 [Nelumbo nucifera]	1.55	Up	0.045362	--	--	--	--	--	--	--	--	--	--	--	--	--	--	--	--
F01_cb7844_c2/f1p0/1884	hypothetical protein SELMODRAFT_410819 [Selaginella moellendorffii]	1.538	Up	0.0154756	--	--	--	--	--	--	--	--	--	--	--	--	--	--	--	--
F01_cb14396_c0/f1p0/529	PREDICTED: Peamaclein OS=Prunus persica PE=1 SV=1	3.278	Up	0.0175763	--	--	--	--	--	--	--	--	--	--	--	--	--	--	--	--
F02_cb8941_c8/f1p0/1776	"""PREDICTED: Outer envelope pore protein 37, chloroplastic OS=Pisum sativum GN=OEP37 PE=1 SV=1"""	1.354	Up	0.03124	1.346	Up	0.040199	1.276	--	0.096504	1.284	Up	0.028136	--	--	--	--	--	--	--
F02_cb3583_c6/f1p0/2456	hypothetical protein AMTR_s00010p00158940 [Amborella trichopoda]	1.822	Up	0.012321	--	--	--	--	--	--	--	--	--	GO:0016310 phosphorylation; GO:0044267 cellular protein metabolic process; GO:0044238 primary metabolic process; GO:0044237 cellular metabolic process; GO:0006796 phosphate-containing compound metabolic process; GO:0071704 organic substance metabolic process; GO:0008152 metabolic process; GO:0006468 protein phosphorylation; GO:0006793 phosphorus metabolic process; GO:0044260 cellular macromolecul…	--	GO:0005524 ATP binding; GO:1901265 nucleoside phosphate binding; GO:0016773 phosphotransferase activity, alcohol group as acceptor; GO:0001882 nucleoside binding; GO:0043167 ion binding; GO:0004672 protein kinase activity; GO:0000166 nucleotide binding; GO:0097159 organic cyclic compound binding; GO:1901363 heterocyclic compound binding; GO:0032549 ribonucleoside binding; GO:0097367 carbohydrate …	--	--	R	FOG: Leucine rich repeat
F02_cb12550_c2/f4p0/956	PREDICTED: Short-chain type dehydrogenase/reductase OS=Picea abies PE=2 SV=1	0.11	Down	0.00097963	0.09	Down	0.00138428	1.102	--	0.90272	1.35	--	0.2667	--	--	GO:0003824 catalytic activity; GO:0016491 oxidoreductase activity;	atr:s00005p00200590; AMTR_s00005p00200590; hypothetical protein; K00059 3-oxoacyl-[acyl-carrier protein] reductase [EC:1.1.1.100] (A)	ko00061 Fatty acid biosynthesis; ko01212 Fatty acid metabolism; ko00780 Biotin metabolism; ko01040 Biosynthesis of unsaturated fatty acids;	R	Reductases with broad range of substrate specificities
F01_cb5000_c122274/f1p0/1839	PREDICTED: Tryptophan synthase alpha chain OS=Arabidopsis thaliana GN=TRPA1 PE=1 SV=2	0.666	Down	0.00065686	0.94	--	0.64716	1.175	--	0.22178	0.833	--	0.103015	GO:0044106 cellular amine metabolic process; GO:0009072 aromatic amino acid family metabolic process; GO:0006725 cellular aromatic compound metabolic process; GO:0044281 small molecule metabolic process; GO:0044763 single-organism cellular process; GO:0006807 nitrogen compound metabolic process; GO:1901360 organic cyclic compound metabolic process; GO:0044699 single-organism process; GO:0044238 p…	--	GO:0016829 lyase activity; GO:0016836 hydro-lyase activity; GO:0004834 tryptophan synthase activity; GO:0003824 catalytic activity; GO:0016835 carbon-oxygen lyase activity;	rcu:RCOM_0991580; trytophan synthase alpha subunit, putative (EC:4.2.1.20); K01695 tryptophan synthase alpha chain [EC:4.2.1.20] (A)	ko01230 Biosynthesis of amino acids; ko00260 Glycine, serine and threonine metabolism; ko00400 Phenylalanine, tyrosine and tryptophan biosynthesis;	E	Tryptophan synthase alpha chain
F02_cb14048_c3/f1p1/1646	PREDICTED: Probable sugar phosphate/phosphate translocator At5g25400 OS=Arabidopsis thaliana GN=At5g25400 PE=2 SV=1	1.921	Up	0.0035424	--	--	--	--	--	--	--	--	--	--	--	--	--	--	GE	Glucose-6-phosphate/phosphate and phosphoenolpyruvate/phosphate antiporter
F02_cb9735_c123326/f1p0/2039	"""PREDICTED: 3-ketoacyl-CoA thiolase 2, peroxisomal OS=Arabidopsis thaliana GN=PED1 PE=1 SV=2"""	0.385	Down	0.020984	--	--	--	--	--	--	--	--	--	GO:0008152 metabolic process;	--	GO:0016746 transferase activity, transferring acyl groups; GO:0016747 transferase activity, transferring acyl groups other than amino-acyl groups; GO:0003824 catalytic activity; GO:0016740 transferase activity;	sly:101255924; 3-ketoacyl-CoA thiolase 2, peroxisomal; K07513 acetyl-CoA acyltransferase 1 [EC:2.3.1.16] (A)	ko00280 Valine, leucine and isoleucine degradation; ko04146 Peroxisome; ko00592 alpha-Linolenic acid metabolism; ko00071 Fatty acid degradation; ko01212 Fatty acid metabolism; ko01040 Biosynthesis of unsaturated fatty acids;	I	3-oxoacyl CoA thiolase
F01_cb9262_c9/f1p0/1681	PREDICTED: SH3 domain-containing protein 2 OS=Arabidopsis thaliana GN=SH3P2 PE=1 SV=1	1.411	Up	0.044261	1.213	--	0.106041	0.771	--	0.099315	0.896	--	0.28728	--	--	GO:0005515 protein binding; GO:0005488 binding;	--	--	IT	Lysophosphatidic acid acyltransferase endophilin/SH3GL, involved in synaptic vesicle formation
F02_cb8205_c3/f2p0/1905	PREDICTED: Protein FLX-like 2 OS=Arabidopsis thaliana GN=FLXL2 PE=1 SV=1	4.907	Up	0.00137912	4.672	Up	0.00147834	0.659	--	0.140675	0.692	--	0.076125	--	--	--	--	--	--	--
F01_cb6000_c5/f1p0/2171	PREDICTED: BTB/POZ domain-containing protein At5g41330 OS=Arabidopsis thaliana GN=At5g41330 PE=2 SV=1	0.697	Down	0.028159	0.923	--	0.54056	1.878	Up	0.0031414	1.418	--	0.051341	GO:0044085 cellular component biogenesis; GO:0016043 cellular component organization; GO:0071822 protein complex subunit organization; GO:0051260 protein homooligomerization; GO:0022607 cellular component assembly; GO:0065003 macromolecular complex assembly; GO:0070271 protein complex biogenesis; GO:0009987 cellular process; GO:0006461 protein complex assembly; GO:0071840 cellular component organ…	--	GO:0005515 protein binding; GO:0005488 binding;	--	--	R	SETA binding protein SB1 and related proteins, contain BTB/POZ domain
F02_cb3692_c6/f1p2/3301	hypothetical protein AMTR_s00099p00142540 [Amborella trichopoda]	0.572	Down	0.0150765	0.834	--	0.38168	1.93	Up	0.048141	1.325	--	0.119575	GO:0006457 protein folding; GO:0009987 cellular process;	--	GO:0005524 ATP binding; GO:1901265 nucleoside phosphate binding; GO:0001882 nucleoside binding; GO:0043167 ion binding; GO:0005515 protein binding; GO:0000166 nucleotide binding; GO:0097159 organic cyclic compound binding; GO:1901363 heterocyclic compound binding; GO:0032549 ribonucleoside binding; GO:0097367 carbohydrate derivative binding; GO:0032553 ribonucleotide binding; GO:0005488 binding; …	--	--	O	Putative ATP-dependent Clp-type protease (AAA+ ATPase superfamily)
F01_cb8027_c0/f3p0/1808	PREDICTED: Sorting nexin 1 OS=Arabidopsis thaliana GN=SNX1 PE=1 SV=1	0.746	Down	0.0188619	1.045	--	0.2887	1.949	Up	0.00054427	1.392	Up	0.0034997	--	--	GO:0008289 lipid binding; GO:0043168 anion binding; GO:0005488 binding; GO:0035091 phosphatidylinositol binding; GO:0005543 phospholipid binding; GO:0043167 ion binding;	--	--	U	Membrane coat complex Retromer, subunit VPS5/SNX1, Sorting nexins, and related PX domain-containing proteins
F01_cb7357_c2/f1p1/1941	hypothetical protein AMTR_s00039p00228400 [Amborella trichopoda]	0.759	Down	0.023037	0.733	--	0.3707	0.74	--	0.37894	0.766	Down	0.0148406	GO:0006810 transport; GO:0051179 localization; GO:0051234 establishment of localization;	GO:0005623 cell; GO:0005622 intracellular; GO:0044464 cell part;	GO:0097159 organic cyclic compound binding; GO:1901363 heterocyclic compound binding; GO:1901265 nucleoside phosphate binding; GO:0005488 binding; GO:0003676 nucleic acid binding; GO:0000166 nucleotide binding; GO:0036094 small molecule binding;	--	--	T	RasGAP SH3 binding protein rasputin, contains NTF2 and RRM domains
F01_cb8331_c15/f1p0/1198	PREDICTED: Protein STRICTOSIDINE SYNTHASE-LIKE 5 OS=Arabidopsis thaliana GN=SSL5 PE=2 SV=1	0.616	Down	0.0038021	0.331	Down	0.028944	0.423	--	0.050079	0.788	--	0.112603	GO:0009058 biosynthetic process; GO:0008152 metabolic process;	--	GO:0016844 strictosidine synthase activity; GO:0016829 lyase activity; GO:0016840 carbon-nitrogen lyase activity; GO:0016843 amine-lyase activity; GO:0003824 catalytic activity;	--	--	R	Predicted alkaloid synthase/Surface mucin Hemomucin
F02_cb3285_c28/f1p0/2792	unnamed protein product [Coffea canephora]	1.553	Up	0.0174364	--	--	--	--	--	--	--	--	--	--	--	--	--	--	--	--
F02_cb11077_c2/f4p0/655	PREDICTED: Cytochrome b-c1 complex subunit 6 OS=Solanum tuberosum PE=1 SV=2	2.996	Up	0.0152839	2.914	Up	0.03808	0.381	Down	0.030018	0.392	Down	0.040864	GO:0016310 phosphorylation; GO:0009116 nucleoside metabolic process; GO:0042278 purine nucleoside metabolic process; GO:0006725 cellular aromatic compound metabolic process; GO:0009167 purine ribonucleoside monophosphate metabolic process; GO:0042773 ATP synthesis coupled electron transport; GO:0009259 ribonucleotide metabolic process; GO:0009117 nucleotide metabolic process; GO:0044699 single-or…	--	GO:0008121 ubiquinol-cytochrome-c reductase activity; GO:0015075 ion transmembrane transporter activity; GO:0016679 oxidoreductase activity, acting on diphenols and related substances as donors; GO:0003824 catalytic activity; GO:0022892 substrate-specific transporter activity; GO:0015077 monovalent inorganic cation transmembrane transporter activity; GO:0022890 inorganic cation transmembrane tran…	--	--	C	Ubiquinol-cytochrome c reductase hinge protein
F01_cb2320_c51/f1p0/2659	PREDICTED: Elongation factor 1-alpha OS=Oryza sativa subsp. japonica GN=REFA1 PE=2 SV=2	0.689	Down	0.045317	--	--	--	--	--	--	--	--	--	--	--	GO:1901265 nucleoside phosphate binding; GO:0001882 nucleoside binding; GO:0043167 ion binding; GO:0016817 hydrolase activity, acting on acid anhydrides; GO:0016787 hydrolase activity; GO:0000166 nucleotide binding; GO:0017111 nucleoside-triphosphatase activity; GO:0097159 organic cyclic compound binding; GO:1901363 heterocyclic compound binding; GO:0032549 ribonucleoside binding; GO:0097367 carb…	csv:101217809; eukaryotic peptide chain release factor GTP-binding subunit ERF3A-like; K03267 peptide chain release factor subunit 3 (A)	ko03015 mRNA surveillance pathway;	J	Polypeptide release factor 3
F02_cb8716_c4/f1p0/4012	PREDICTED: 60S ribosomal protein L22-2 OS=Arabidopsis thaliana GN=RPL22B PE=2 SV=1	0.458	Down	0.029076	--	--	--	--	--	--	--	--	--	GO:0006518 peptide metabolic process; GO:0043043 peptide biosynthetic process; GO:0044267 cellular protein metabolic process; GO:0006807 nitrogen compound metabolic process; GO:0009058 biosynthetic process; GO:0043603 cellular amide metabolic process; GO:0044238 primary metabolic process; GO:1901566 organonitrogen compound biosynthetic process; GO:1901576 organic substance biosynthetic process; G…	GO:0005840 ribosome; GO:0043226 organelle; GO:0043229 intracellular organelle; GO:0043232 intracellular non-membrane-bounded organelle; GO:0044464 cell part; GO:0005622 intracellular; GO:0005737 cytoplasm; GO:0032991 macromolecular complex; GO:0044424 intracellular part; GO:1990904 ribonucleoprotein complex; GO:0005623 cell; GO:0030529 intracellular ribonucleoprotein complex; GO:0044444 cytoplasm…	GO:0003735 structural constituent of ribosome; GO:0005198 structural molecule activity;	smo:SELMODRAFT_270704; hypothetical protein; K02891 large subunit ribosomal protein L22e (A)	ko03010 Ribosome;	J	60S ribosomal protein L22
F02_cb14900_c4/f1p0/634	unknown [Picea sitchensis]	2.435	Up	0.037583	1.946	Up	0.00658	0.463	Down	0.0048953	0.58	--	0.21944	--	--	--	--	--	--	--
F02_cb8201_c505/f1p4/2523	PREDICTED: Cytochrome P450 750A1 OS=Pinus taeda GN=CYP750A1 PE=2 SV=1	1.981	Up	0.036585	--	--	--	--	--	--	--	--	--	GO:0008152 metabolic process; GO:0055114 oxidation-reduction process; GO:0044710 single-organism metabolic process; GO:0044699 single-organism process; GO:0006508 proteolysis; GO:0019538 protein metabolic process; GO:0043170 macromolecule metabolic process; GO:0044238 primary metabolic process; GO:0071704 organic substance metabolic process;	--	GO:0008233 peptidase activity; GO:0005506 iron ion binding; GO:0043167 ion binding; GO:0008236 serine-type peptidase activity; GO:0016705 oxidoreductase activity, acting on paired donors, with incorporation or reduction of molecular oxygen; GO:0016787 hydrolase activity; GO:0016491 oxidoreductase activity; GO:0004175 endopeptidase activity; GO:0004252 serine-type endopeptidase activity; GO:190136…	--	--	Q	Cytochrome P450 CYP2 subfamily
F01_cb10396_c14/f1p0/1288	unknown [Picea sitchensis]	0.104	Down	0.00149745	0.217	Down	0.000164106	2.076	Up	0.0097244	0.993	--	0.86262	--	--	--	atr:s00009p00236890; AMTR_s00009p00236890; hypothetical protein; K13993 HSP20 family protein (A)	ko04141 Protein processing in endoplasmic reticulum;	O	Molecular chaperone (small heat-shock protein Hsp26/Hsp42)
F02_cb13087_c3/f1p0/1547	PREDICTED: L-lactate dehydrogenase B (Fragment) OS=Hordeum vulgare PE=1 SV=1	3.679	Up	0.0035184	4.97	Up	0.0022358	0.498	Down	0.036021	0.369	Down	0.0092037	GO:0008152 metabolic process; GO:0055114 oxidation-reduction process; GO:0044710 single-organism metabolic process; GO:0044281 small molecule metabolic process; GO:0044763 single-organism cellular process; GO:0019752 carboxylic acid metabolic process; GO:0044699 single-organism process; GO:0005975 carbohydrate metabolic process; GO:0044238 primary metabolic process; GO:0006082 organic acid metabo…	GO:0044424 intracellular part; GO:0005623 cell; GO:0044464 cell part; GO:0005622 intracellular; GO:0005737 cytoplasm;	GO:0016614 oxidoreductase activity, acting on CH-OH group of donors; GO:0004457 lactate dehydrogenase activity; GO:0016616 oxidoreductase activity, acting on the CH-OH group of donors, NAD or NADP as acceptor; GO:0004459 L-lactate dehydrogenase activity; GO:0003824 catalytic activity; GO:0016491 oxidoreductase activity;	vvi:100250615; L-lactate dehydrogenase A; K00016 L-lactate dehydrogenase [EC:1.1.1.27] (A)	ko00270 Cysteine and methionine metabolism; ko00010 Glycolysis / Gluconeogenesis; ko00620 Pyruvate metabolism; ko00640 Propanoate metabolism;	C	Lactate dehydrogenase
F02_cb173_c25/f1p1/3815	PREDICTED: callose synthase 3-like [Phoenix dactylifera]	1.836	Up	0.0029598	--	--	--	--	--	--	--	--	--	GO:0016051 carbohydrate biosynthetic process; GO:0006074 (1->3)-beta-D-glucan metabolic process; GO:0044711 single-organism biosynthetic process; GO:0006073 cellular glucan metabolic process; GO:0000271 polysaccharide biosynthetic process; GO:0044042 glucan metabolic process; GO:0044763 single-organism cellular process; GO:0044699 single-organism process; GO:0033692 cellular polysaccharide biosyn…	GO:0016020 membrane; GO:1902494 catalytic complex; GO:0044459 plasma membrane part; GO:0044425 membrane part; GO:0044464 cell part; GO:0071944 cell periphery; GO:0032991 macromolecular complex; GO:1990234 transferase complex; GO:0005623 cell; GO:0000148 1,3-beta-D-glucan synthase complex; GO:0005886 plasma membrane;	GO:0016758 transferase activity, transferring hexosyl groups; GO:0003824 catalytic activity; GO:0035251 UDP-glucosyltransferase activity; GO:0008194 UDP-glycosyltransferase activity; GO:0046527 glucosyltransferase activity; GO:0016757 transferase activity, transferring glycosyl groups; GO:0003843 1,3-beta-D-glucan synthase activity; GO:0016740 transferase activity;	--	--	M	1,3-beta-glucan synthase/callose synthase catalytic subunit
F02_cb25_c17/f1p0/2584	PREDICTED: protein PAT1 homolog 1 isoform X1 [Elaeis guineensis]	2.208	Up	0.0028612	--	--	--	--	--	--	--	--	--	--	--	--	pda:103709822; protein PAT1 homolog 1-like; K12617 DNA topoisomerase 2-associated protein PAT1 (A)	ko03018 RNA degradation;	--	--
F02_cb5503_c0/f1p0/2343	PREDICTED: Probable disease resistance protein At5g63020 OS=Arabidopsis thaliana GN=At5g63020 PE=2 SV=2	3.885	Up	0.00039953	--	--	--	--	--	--	--	--	--	--	--	GO:1901265 nucleoside phosphate binding; GO:0001882 nucleoside binding; GO:0043167 ion binding; GO:0005515 protein binding; GO:0000166 nucleotide binding; GO:0097159 organic cyclic compound binding; GO:1901363 heterocyclic compound binding; GO:0032549 ribonucleoside binding; GO:0097367 carbohydrate derivative binding; GO:0032553 ribonucleotide binding; GO:0005488 binding; GO:0032550 purine ribonu…	--	--	T	Apoptotic ATPase
F02_cb10871_c10/f1p0/1551	PREDICTED: Probable pectate lyase 5 OS=Arabidopsis thaliana GN=At1g67750 PE=2 SV=2	0.689	Down	0.0419	--	--	--	--	--	--	--	--	--	--	--	--	aly:ARALYDRAFT_664577; hypothetical protein; K01728 pectate lyase [EC:4.2.2.2] (A)	ko00040 Pentose and glucuronate interconversions;	--	--
F02_cb11764_c12/f2p0/1261	PREDICTED: Stromal cell-derived factor 2-like protein OS=Arabidopsis thaliana GN=SDF2 PE=1 SV=1	9.943	Up	0.00040344	9.267	Up	0.002278	1.674	--	0.182323	1.797	--	0.071941	--	GO:0016020 membrane;	--	--	--	R	Uncharacterized secreted protein SDF2 (Stromal cell-derived factor 2), contains MIR domains
F02_cb15626_c4/f1p0/611	PREDICTED: CDGSH iron-sulfur domain-containing protein NEET OS=Arabidopsis thaliana GN=NEET PE=1 SV=1	1.336	Up	0.021955	1.924	--	0.125317	1.859	--	0.144943	1.29	Up	0.024062	--	GO:0043231 intracellular membrane-bounded organelle; GO:0043226 organelle; GO:0043229 intracellular organelle; GO:0044464 cell part; GO:0005622 intracellular; GO:0044424 intracellular part; GO:0043227 membrane-bounded organelle; GO:0005623 cell;	GO:0051537 2 iron, 2 sulfur cluster binding; GO:0005488 binding; GO:0051536 iron-sulfur cluster binding; GO:0051540 metal cluster binding;	--	--	R	CDGSH-type Zn-finger containing protein
F02_cb10671_c2/f2p1/1465	PREDICTED: Aspartyl protease family protein 2 OS=Arabidopsis thaliana GN=APF2 PE=2 SV=1	6.284	Up	0.0023222	3.261	Up	0.00089923	0.304	Down	0.0126815	0.587	Down	0.0117035	GO:0006508 proteolysis; GO:0008152 metabolic process; GO:0043170 macromolecule metabolic process; GO:0019538 protein metabolic process; GO:0044238 primary metabolic process; GO:0071704 organic substance metabolic process;	--	GO:0004175 endopeptidase activity; GO:0008233 peptidase activity; GO:0003824 catalytic activity; GO:0004190 aspartic-type endopeptidase activity; GO:0070011 peptidase activity, acting on L-amino acid peptides; GO:0016787 hydrolase activity; GO:0070001 aspartic-type peptidase activity;	--	--	O	Aspartyl protease
F02_cb3312_c0/f1p0/2985	Beta-xylosidase/alpha-L-arabinofuranosidase 2 [Gossypium arboreum]	4.051	Up	1.57849e-05	7.399	Up	0.00021601	1.042	--	0.81798	0.57	Down	0.032784	GO:0008152 metabolic process; GO:0005975 carbohydrate metabolic process; GO:0044238 primary metabolic process; GO:0071704 organic substance metabolic process;	--	GO:0004553 hydrolase activity, hydrolyzing O-glycosyl compounds; GO:0016787 hydrolase activity; GO:0003824 catalytic activity; GO:0016798 hydrolase activity, acting on glycosyl bonds;	zma:100279996; uncharacterized LOC100279996; K15920 beta-D-xylosidase 4 [EC:3.2.1.37] (A)	ko00500 Starch and sucrose metabolism; ko00520 Amino sugar and nucleotide sugar metabolism;	--	--
F02_cb5027_c1/f1p0/2697	"""Systemin receptor SR160 precursor, putative [Ricinus communis]"""	1.582	Up	0.0100643	1.117	--	0.33694	0.754	Down	0.0121602	1.068	--	0.64794	GO:0016310 phosphorylation; GO:0044267 cellular protein metabolic process; GO:0044238 primary metabolic process; GO:0044237 cellular metabolic process; GO:0006796 phosphate-containing compound metabolic process; GO:0071704 organic substance metabolic process; GO:0008152 metabolic process; GO:0006468 protein phosphorylation; GO:0006793 phosphorus metabolic process; GO:0044260 cellular macromolecul…	--	GO:0005524 ATP binding; GO:1901265 nucleoside phosphate binding; GO:0016773 phosphotransferase activity, alcohol group as acceptor; GO:0001882 nucleoside binding; GO:0043167 ion binding; GO:0005515 protein binding; GO:0004672 protein kinase activity; GO:0000166 nucleotide binding; GO:0097159 organic cyclic compound binding; GO:1901363 heterocyclic compound binding; GO:0032549 ribonucleoside bindi…	--	--	R	FOG: Leucine rich repeat
F02_cb8367_c5/f1p0/1763	PREDICTED: nucleosome assembly protein 1;4-like [Vitis vinifera]	1.414	Up	0.03784	--	--	--	--	--	--	--	--	--	GO:0044085 cellular component biogenesis; GO:0016043 cellular component organization; GO:0034728 nucleosome organization; GO:0034622 cellular macromolecular complex assembly; GO:0006333 chromatin assembly or disassembly; GO:0043933 macromolecular complex subunit organization; GO:0065004 protein-DNA complex assembly; GO:0006323 DNA packaging; GO:0006334 nucleosome assembly; GO:0051276 chromosome o…	GO:0043226 organelle; GO:0043231 intracellular membrane-bounded organelle; GO:0043229 intracellular organelle; GO:0005634 nucleus; GO:0044464 cell part; GO:0005622 intracellular; GO:0044424 intracellular part; GO:0043227 membrane-bounded organelle; GO:0005623 cell;	--	--	--	BD	Nucleosome assembly protein NAP-1
F02_cb11274_c10/f1p1/1159	PREDICTED: Probable signal peptidase complex subunit 2 OS=Arabidopsis thaliana GN=At2g39960 PE=2 SV=1	6.808	Up	0.0032621	--	--	--	--	--	--	--	--	--	GO:0006518 peptide metabolic process; GO:0006465 signal peptide processing; GO:0044267 cellular protein metabolic process; GO:0006807 nitrogen compound metabolic process; GO:0016485 protein processing; GO:0043603 cellular amide metabolic process; GO:0044238 primary metabolic process; GO:0044237 cellular metabolic process; GO:0071704 organic substance metabolic process; GO:0008152 metabolic proces…	GO:0043229 intracellular organelle; GO:0016020 membrane; GO:0005783 endoplasmic reticulum; GO:0042175 nuclear outer membrane-endoplasmic reticulum membrane network; GO:0098796 membrane protein complex; GO:0005737 cytoplasm; GO:0044446 intracellular organelle part; GO:0012505 endomembrane system; GO:0032991 macromolecular complex; GO:0031224 intrinsic component of membrane; GO:0044424 intracellula…	GO:0008233 peptidase activity; GO:0016787 hydrolase activity; GO:0003824 catalytic activity;	cmo:103501424; probable signal peptidase complex subunit 2; K12947 signal peptidase complex subunit 2 [EC:3.4.-.-] (A)	ko03060 Protein export;	--	--
F02_cb11042_c2/f1p0/1259	hypothetical protein JCGZ_05137 [Jatropha curcas]	0.74	Down	0.046195	0.867	--	0.49346	1.067	--	0.88816	0.911	--	0.49478	GO:0033554 cellular response to stress; GO:0051716 cellular response to stimulus; GO:0006284 base-excision repair; GO:0006725 cellular aromatic compound metabolic process; GO:0006950 response to stress; GO:0006259 DNA metabolic process; GO:1901360 organic cyclic compound metabolic process; GO:0006807 nitrogen compound metabolic process; GO:0044238 primary metabolic process; GO:0050896 response to…	--	GO:0003824 catalytic activity;	pmum:103340095; DNA-3-methyladenine glycosylase 1; K01247 DNA-3-methyladenine glycosylase II [EC:3.2.2.21] (A)	ko03410 Base excision repair;	L	3-methyladenine DNA glycosidase
F02_cb13548_c3/f1p0/710	unknown [Picea sitchensis]	8.879	Up	0.0064645	--	--	--	--	--	--	--	--	--	--	--	--	--	--	S	Uncharacterized conserved protein
F01_cb11641_c5/f1p0/1157	"""hypothetical protein CL593Contig1_05, partial [Pinus radiata]"""	2.179	Up	0.024144	--	--	--	--	--	--	--	--	--	GO:0044085 cellular component biogenesis; GO:0016043 cellular component organization; GO:0034728 nucleosome organization; GO:0034622 cellular macromolecular complex assembly; GO:0006333 chromatin assembly or disassembly; GO:0043933 macromolecular complex subunit organization; GO:0065004 protein-DNA complex assembly; GO:0006323 DNA packaging; GO:0006334 nucleosome assembly; GO:0051276 chromosome o…	GO:0043229 intracellular organelle; GO:0043232 intracellular non-membrane-bounded organelle; GO:0044446 intracellular organelle part; GO:0032991 macromolecular complex; GO:0044424 intracellular part; GO:0005623 cell; GO:0044422 organelle part; GO:0044427 chromosomal part; GO:0000786 nucleosome; GO:0043228 non-membrane-bounded organelle; GO:0043231 intracellular membrane-bounded organelle; GO:0043…	GO:0097159 organic cyclic compound binding; GO:1901363 heterocyclic compound binding; GO:0003677 DNA binding; GO:0005488 binding; GO:0003676 nucleic acid binding;	--	--	--	--
F02_cb6753_c3/f1p0/2202	"""PREDICTED: Protoporphyrinogen oxidase 2, chloroplastic/mitochondrial OS=Arabidopsis thaliana GN=PPOX2 PE=1 SV=1"""	1.99	Up	0.048	1.339	Up	0.029857	1.169	--	0.137642	1.737	Up	0.025196	GO:0051188 cofactor biosynthetic process; GO:0018130 heterocycle biosynthetic process; GO:0006725 cellular aromatic compound metabolic process; GO:0055114 oxidation-reduction process; GO:0006779 porphyrin-containing compound biosynthetic process; GO:1901360 organic cyclic compound metabolic process; GO:0044699 single-organism process; GO:0006807 nitrogen compound metabolic process; GO:0009058 bio…	--	GO:0016627 oxidoreductase activity, acting on the CH-CH group of donors; GO:0016634 oxidoreductase activity, acting on the CH-CH group of donors, oxygen as acceptor; GO:0003824 catalytic activity; GO:0070818 protoporphyrinogen oxidase activity; GO:0004729 oxygen-dependent protoporphyrinogen oxidase activity; GO:0016491 oxidoreductase activity;	pda:103702932; protoporphyrinogen oxidase, mitochondrial; K00231 oxygen-dependent protoporphyrinogen oxidase [EC:1.3.3.4] (A)	ko00860 Porphyrin and chlorophyll metabolism;	H	Protoporphyrinogen oxidase
F01_cb14609_c0/f2p0/893	PREDICTED: Protein FAR1-RELATED SEQUENCE 3 OS=Arabidopsis thaliana GN=FRS3 PE=2 SV=2	3.114	Up	0.028138	--	--	--	--	--	--	--	--	--	--	--	--	--	--	--	--
F01_cb3384_c38/f25p0/1819	PREDICTED: Heterogeneous nuclear ribonucleoprotein 1 OS=Arabidopsis thaliana GN=RNP1 PE=1 SV=1	0.35	Down	0.0098845	--	--	--	--	--	--	--	--	--	--	--	GO:0097159 organic cyclic compound binding; GO:1901363 heterocyclic compound binding; GO:1901265 nucleoside phosphate binding; GO:0005488 binding; GO:0003676 nucleic acid binding; GO:0000166 nucleotide binding; GO:0036094 small molecule binding;	vvi:100247389; RNA-binding protein Musashi homolog 2; K14411 RNA-binding protein Musashi (A)	ko03015 mRNA surveillance pathway;	R	FOG: RRM domain
F01_cb10733_c20/f1p0/1059	"""PREDICTED: 25.3 kDa heat shock protein, chloroplastic OS=Arabidopsis thaliana GN=HSP25.3 PE=2 SV=1"""	0.463	Down	0.013858	0.358	Down	0.026364	1.123	--	0.83506	1.451	--	0.173776	--	--	--	atr:s00009p00236890; AMTR_s00009p00236890; hypothetical protein; K13993 HSP20 family protein (A)	ko04141 Protein processing in endoplasmic reticulum;	O	Molecular chaperone (small heat-shock protein Hsp26/Hsp42)
F01_cb11134_c0/f4p1/878	"""hypothetical protein MIMGU_mgv1a018909mg, partial [Erythranthe guttata]"""	0.08	Down	0.00053768	0.296	Down	0.0092987	0.999	--	0.884	0.269	Down	0.0093355	--	--	--	atr:s00009p00236890; AMTR_s00009p00236890; hypothetical protein; K13993 HSP20 family protein (A)	ko04141 Protein processing in endoplasmic reticulum;	O	Molecular chaperone (small heat-shock protein Hsp26/Hsp42)
F01_cb5000_c9141/f8p2/2446	PREDICTED: uncharacterized protein LOC105040648 [Elaeis guineensis]	0.106	Down	0.0044447	--	--	--	--	--	--	--	--	--	GO:0006810 transport; GO:0055085 transmembrane transport; GO:0051179 localization; GO:0051234 establishment of localization;	GO:0031224 intrinsic component of membrane; GO:0016020 membrane; GO:0016021 integral component of membrane; GO:0044425 membrane part;	GO:0043169 cation binding; GO:0046872 metal ion binding; GO:0005509 calcium ion binding; GO:0005488 binding; GO:0043167 ion binding;	--	--	--	--
F02_cb6008_c8/f1p0/1741	"""PREDICTED: arginine biosynthesis bifunctional protein ArgJ, chloroplastic-like [Vitis vinifera]"""	0.701	Down	0.016559	0.608	Down	0.0023196	0.918	--	0.44014	1.058	--	0.4878	GO:0009064 glutamine family amino acid metabolic process; GO:0008652 cellular amino acid biosynthetic process; GO:0006526 arginine biosynthetic process; GO:0016053 organic acid biosynthetic process; GO:0044711 single-organism biosynthetic process; GO:0044281 small molecule metabolic process; GO:0044763 single-organism cellular process; GO:0006525 arginine metabolic process; GO:0044699 single-orga…	--	GO:0004358 glutamate N-acetyltransferase activity; GO:0016746 transferase activity, transferring acyl groups; GO:0008080 N-acetyltransferase activity; GO:0016747 transferase activity, transferring acyl groups other than amino-acyl groups; GO:0016740 transferase activity; GO:0003824 catalytic activity; GO:0016407 acetyltransferase activity; GO:0016410 N-acyltransferase activity;	vvi:100253362; arginine biosynthesis bifunctional protein ArgJ, chloroplastic-like; K00620 glutamate N-acetyltransferase / amino-acid N-acetyltransferase [EC:2.3.1.35 2.3.1.1] (A)	ko00330 Arginine and proline metabolism; ko01230 Biosynthesis of amino acids; ko01210 2-Oxocarboxylic acid metabolism;	E	Putative glutamate/ornithine acetyltransferase
F02_cb6004_c3/f1p1/2273	hypothetical protein AMTR_s00037p00109800 [Amborella trichopoda]	0.601	Down	0.043061	--	--	--	--	--	--	--	--	--	GO:0050794 regulation of cellular process; GO:0042592 homeostatic process; GO:0065008 regulation of biological quality; GO:0050789 regulation of biological process; GO:0045454 cell redox homeostasis; GO:0044763 single-organism cellular process; GO:0019725 cellular homeostasis; GO:0044699 single-organism process; GO:0009987 cellular process; GO:0065007 biological regulation;	--	--	--	--	R	Thioredoxin, nucleoredoxin and related proteins
F01_cb10502_c181/f1p4/822	PREDICTED: Pathogenesis-related protein 1A OS=Nicotiana tabacum PE=1 SV=1	3.078	Up	0.0088033	2.302	Up	0.033459	0.553	Down	0.020981	0.739	--	0.3866	--	GO:0005576 extracellular region;	--	pda:103712272; pathogenesis-related protein PRB1-3-like; K13449 pathogenesis-related protein 1 (A)	ko04075 Plant hormone signal transduction; ko04626 Plant-pathogen interaction;	S	Defense-related protein containing SCP domain
F02_cb5551_c0/f7p1/2186	hypothetical protein SELMODRAFT_122417 [Selaginella moellendorffii]	1.776	Up	0.016378	1.224	--	0.26864	0.42	Down	0.00884	0.61	Down	0.006416	--	--	--	--	--	D	Spindle pole body protein, contains UNC-84 domain
F01_cb6133_c6/f1p0/1830	unknown [Picea sitchensis]	1.483	Up	0.026059	0.56	Down	0.028399	0.516	Down	0.0067758	1.366	--	0.129799	--	--	--	--	--	--	--
F01_cb3101_c10/f1p0/2418	Pescadillo-like protein [Morus notabilis]	0.212	Down	0.00150055	--	--	--	--	--	--	--	--	--	--	--	--	--	--	A	Protein required for normal rRNA processing
F01_cb11321_c4/f1p0/907	PREDICTED: Bet1-like SNARE 1-1 OS=Arabidopsis thaliana GN=BET11 PE=1 SV=1	1.629	Up	0.0095443	0.859	--	0.4148	0.478	Down	0.0086815	0.907	--	0.518	--	--	GO:0005515 protein binding; GO:0005488 binding;	atr:s00032p00222950; AMTR_s00032p00222950; hypothetical protein; K08504 blocked early in transport 1 (A)	ko04130 SNARE interactions in vesicular transport;	U	V-SNARE
F02_cb12721_c3/f1p1/1534	PREDICTED: Ras-related protein Rab2BV OS=Beta vulgaris GN=RAB2BV PE=2 SV=1	9.677	Up	0.00044404	7.334	Up	0.00108126	0.917	--	0.72388	1.21	--	0.3723	GO:0050794 regulation of cellular process; GO:0044700 single organism signaling; GO:0051716 cellular response to stimulus; GO:0007165 signal transduction; GO:0050789 regulation of biological process; GO:0007154 cell communication; GO:0035556 intracellular signal transduction; GO:0044699 single-organism process; GO:0007264 small GTPase mediated signal transduction; GO:0023052 signaling; GO:0050896…	--	GO:1901265 nucleoside phosphate binding; GO:0001882 nucleoside binding; GO:0043167 ion binding; GO:0000166 nucleotide binding; GO:0097159 organic cyclic compound binding; GO:1901363 heterocyclic compound binding; GO:0032549 ribonucleoside binding; GO:0097367 carbohydrate derivative binding; GO:0032553 ribonucleotide binding; GO:0005488 binding; GO:0032550 purine ribonucleoside binding; GO:0043168…	--	--	U	GTPase Rab11/YPT3, small G protein superfamily
F01_cb1841_c1/f2p0/3100	PREDICTED: probable inactive receptor kinase At2g26730 [Nelumbo nucifera]	1.881	Up	0.0081234	0.807	--	0.20776	0.338	Down	0.0020787	0.787	--	0.159536	GO:0016310 phosphorylation; GO:0044267 cellular protein metabolic process; GO:0044238 primary metabolic process; GO:0044237 cellular metabolic process; GO:0006796 phosphate-containing compound metabolic process; GO:0071704 organic substance metabolic process; GO:0008152 metabolic process; GO:0006468 protein phosphorylation; GO:0006793 phosphorus metabolic process; GO:0044260 cellular macromolecul…	--	GO:0005524 ATP binding; GO:1901265 nucleoside phosphate binding; GO:0016773 phosphotransferase activity, alcohol group as acceptor; GO:0001882 nucleoside binding; GO:0043167 ion binding; GO:0005515 protein binding; GO:0004672 protein kinase activity; GO:0000166 nucleotide binding; GO:0097159 organic cyclic compound binding; GO:1901363 heterocyclic compound binding; GO:0032549 ribonucleoside bindi…	--	--	R	FOG: Leucine rich repeat
F02_cb8256_c84/f1p3/1766	PREDICTED: UDP-glycosyltransferase 91A1 OS=Arabidopsis thaliana GN=UGT91A1 PE=2 SV=1	2.471	Up	0.0053009	1.541	Up	0.0091419	4.035	Up	0.00023775	6.469	Up	0.0002555	GO:0008152 metabolic process;	--	GO:0016757 transferase activity, transferring glycosyl groups; GO:0016758 transferase activity, transferring hexosyl groups; GO:0003824 catalytic activity; GO:0016740 transferase activity;	--	--	GC	UDP-glucuronosyl and UDP-glucosyl transferase
F01_cb1147_c11/f1p0/3348	hypothetical protein AMTR_s00021p00214440 [Amborella trichopoda]	0.728	Down	0.0090238	0.896	--	0.43944	1.948	Up	0.0046649	1.582	Up	0.0085031	--	--	GO:0005515 protein binding; GO:0005488 binding;	atr:s00021p00214440; AMTR_s00021p00214440; hypothetical protein; K12200 programmed cell death 6-interacting protein (A)	ko04144 Endocytosis;	R	Predicted signal transduction protein
F01_cb14583_c3/f1p0/1262	unknown [Picea sitchensis]	1.616	Up	0.029239	1.615	Up	0.021045	0.575	Down	0.0030811	0.575	Down	0.039165	GO:0006518 peptide metabolic process; GO:0043043 peptide biosynthetic process; GO:0044267 cellular protein metabolic process; GO:0006807 nitrogen compound metabolic process; GO:0009058 biosynthetic process; GO:0043603 cellular amide metabolic process; GO:0044238 primary metabolic process; GO:1901566 organonitrogen compound biosynthetic process; GO:1901576 organic substance biosynthetic process; G…	GO:0005759 mitochondrial matrix; GO:0005840 ribosome; GO:0043229 intracellular organelle; GO:0044429 mitochondrial part; GO:0043232 intracellular non-membrane-bounded organelle; GO:0044446 intracellular organelle part; GO:0005737 cytoplasm; GO:0032991 macromolecular complex; GO:0044424 intracellular part; GO:0005761 mitochondrial ribosome; GO:0005623 cell; GO:0000313 organellar ribosome; GO:00444…	GO:0003735 structural constituent of ribosome; GO:0005198 structural molecule activity;	--	--	J	Mitochondrial/chloroplast ribosomal protein L4/L29
F02_cb2088_c9/f1p0/4829	hypothetical protein AMTR_s00025p00228240 [Amborella trichopoda]	1.68	Up	0.032238	--	--	--	--	--	--	--	--	--	--	--	GO:0005515 protein binding; GO:0005488 binding;	--	--	--	--
F02_cb1733_c36/f1p0/3256	PREDICTED: Probable LRR receptor-like serine/threonine-protein kinase At5g48740 OS=Arabidopsis thaliana GN=At5g48740 PE=2 SV=1	5.276	Up	0.00043545	--	--	--	--	--	--	--	--	--	GO:0016310 phosphorylation; GO:0044267 cellular protein metabolic process; GO:0044238 primary metabolic process; GO:0044237 cellular metabolic process; GO:0006796 phosphate-containing compound metabolic process; GO:0071704 organic substance metabolic process; GO:0008152 metabolic process; GO:0006468 protein phosphorylation; GO:0006793 phosphorus metabolic process; GO:0044260 cellular macromolecul…	--	GO:0005524 ATP binding; GO:1901265 nucleoside phosphate binding; GO:0016773 phosphotransferase activity, alcohol group as acceptor; GO:0001882 nucleoside binding; GO:0043167 ion binding; GO:0004672 protein kinase activity; GO:0000166 nucleotide binding; GO:0097159 organic cyclic compound binding; GO:1901363 heterocyclic compound binding; GO:0032549 ribonucleoside binding; GO:0097367 carbohydrate …	--	--	T	Serine/threonine protein kinase
F02_cb14797_c0/f2p1/1856	RecName: Full=Bifunctional pinoresinol-lariciresinol reductase 2; Short=PLR-Tp2; AltName: Full=(+)-lariciresinol reductase; AltName: Full=(+)-pinoresinol reductase; AltName: Full=(-)-pinoresinol reductase [Thuja plicata]	1.606	Up	0.0027964	1.307	--	0.168298	1.203	--	0.150297	1.478	--	0.066819	--	--	--	--	--	--	--
F01_cb13324_c0/f4p0/1374	PREDICTED: Golgi SNAP receptor complex member 1-2 OS=Arabidopsis thaliana GN=GOS12 PE=1 SV=2	1.34	Up	0.0042158	1.204	--	0.25474	0.955	--	0.6699	1.063	--	0.45306	GO:0006810 transport; GO:0046907 intracellular transport; GO:0051649 establishment of localization in cell; GO:0016192 vesicle-mediated transport; GO:0048193 Golgi vesicle transport; GO:0051179 localization; GO:0006888 ER to Golgi vesicle-mediated transport; GO:0051641 cellular localization; GO:0051234 establishment of localization;	GO:0043229 intracellular organelle; GO:0016020 membrane; GO:0098588 bounding membrane of organelle; GO:0031090 organelle membrane; GO:0005737 cytoplasm; GO:0044446 intracellular organelle part; GO:0005801 cis-Golgi network; GO:0000139 Golgi membrane; GO:0012505 endomembrane system; GO:0031224 intrinsic component of membrane; GO:0044424 intracellular part; GO:0005623 cell; GO:0016021 integral comp…	--	aly:ARALYDRAFT_903960; hypothetical protein; K08495 golgi SNAP receptor complex member 1 (A)	ko04130 SNARE interactions in vesicular transport;	U	SNARE protein GS28
F02_cb13348_c1/f5p0/1038	PREDICTED: Mitochondrial pyruvate carrier 4 OS=Arabidopsis thaliana GN=MPC4 PE=3 SV=1	2.117	Up	0.044957	1.358	--	0.057904	0.651	Down	0.045244	1.015	--	0.78614	GO:0006839 mitochondrial transport; GO:0044699 single-organism process; GO:0071702 organic substance transport; GO:0046942 carboxylic acid transport; GO:0015849 organic acid transport; GO:0051234 establishment of localization; GO:0006810 transport; GO:0006820 anion transport; GO:0015711 organic anion transport; GO:1902578 single-organism localization; GO:0015718 monocarboxylic acid transport; GO:…	GO:0016020 membrane; GO:0043229 intracellular organelle; GO:0044429 mitochondrial part; GO:0031090 organelle membrane; GO:0031967 organelle envelope; GO:0044446 intracellular organelle part; GO:0005737 cytoplasm; GO:0044424 intracellular part; GO:0005623 cell; GO:0044422 organelle part; GO:0005739 mitochondrion; GO:0005740 mitochondrial envelope; GO:0043231 intracellular membrane-bounded organell…	--	--	--	S	Uncharacterized conserved protein
F02_cb1240_c28/f5p1/3348	hypothetical protein AMTR_s00025p00221330 [Amborella trichopoda]	1.757	Up	0.0062802	0.681	--	0.195397	0.249	Down	0.0064798	0.642	Down	0.026563	--	--	--	--	--	--	--
F01_cb13292_c7/f1p0/1353	PREDICTED: Probable calcium-binding protein CML49 OS=Arabidopsis thaliana GN=CML49 PE=2 SV=1	1.258	Up	0.04248	1.682	Up	0.00053909	1.939	Up	0.00049947	1.45	Up	0.0052578	--	--	GO:0043169 cation binding; GO:0046872 metal ion binding; GO:0005509 calcium ion binding; GO:0005488 binding; GO:0043167 ion binding;	pda:103709704; probable calcium-binding protein CML27; K13448 calcium-binding protein CML (A)	ko04626 Plant-pathogen interaction;	T	Ca2+-binding protein, EF-Hand protein superfamily
F01_cb3133_c8/f1p0/2324	hypothetical protein JCGZ_04608 [Jatropha curcas]	2.471	Up	0.0020839	--	--	--	--	--	--	--	--	--	--	GO:0016020 membrane;	GO:0015923 mannosidase activity; GO:0015924 mannosyl-oligosaccharide mannosidase activity; GO:0003824 catalytic activity; GO:0005488 binding; GO:0016798 hydrolase activity, acting on glycosyl bonds; GO:0004559 alpha-mannosidase activity; GO:0043167 ion binding; GO:0004553 hydrolase activity, hydrolyzing O-glycosyl compounds; GO:0046872 metal ion binding; GO:0043169 cation binding; GO:0016787 hydr…	rcu:RCOM_0632950; endoplasmic reticulum mannosyl-oligosaccharide 1,2-alpha-mannosidase, putative (EC:3.2.1.113); K01230 mannosyl-oligosaccharide alpha-1,2-mannosidase [EC:3.2.1.113] (A)	ko04141 Protein processing in endoplasmic reticulum; ko00510 N-Glycan biosynthesis;	G	1, 2-alpha-mannosidase
F02_cb13445_c0/f1p0/1312	PREDICTED: probable inactive purple acid phosphatase 16 isoform X2 [Elaeis guineensis]	6.45	Up	0.00036263	--	--	--	--	--	--	--	--	--	--	--	GO:0016787 hydrolase activity; GO:0003824 catalytic activity;	--	--	R	Predicted DNA repair exonuclease SIA1
F02_cb11582_c1/f1p0/984	hypothetical protein AMTR_s00062p00076280 [Amborella trichopoda]	2.104	Up	0.0007372	1.542	--	0.130337	0.452	Down	0.0155214	0.617	Down	0.0072367	--	--	--	--	--	--	--
F01_cb11988_c13/f5p0/543	PREDICTED: 40S ribosomal protein S28 OS=Zea mays GN=RPS28 PE=3 SV=1	1.611	Up	0.0030602	1.681	Up	0.021223	0.972	--	0.79384	0.931	--	0.119718	GO:0006518 peptide metabolic process; GO:0043043 peptide biosynthetic process; GO:0044267 cellular protein metabolic process; GO:0006807 nitrogen compound metabolic process; GO:0009058 biosynthetic process; GO:0043603 cellular amide metabolic process; GO:0044238 primary metabolic process; GO:1901566 organonitrogen compound biosynthetic process; GO:1901576 organic substance biosynthetic process; G…	GO:0005840 ribosome; GO:0043226 organelle; GO:0043229 intracellular organelle; GO:0043232 intracellular non-membrane-bounded organelle; GO:0044464 cell part; GO:0005622 intracellular; GO:0005737 cytoplasm; GO:0032991 macromolecular complex; GO:0044424 intracellular part; GO:1990904 ribonucleoprotein complex; GO:0005623 cell; GO:0030529 intracellular ribonucleoprotein complex; GO:0044444 cytoplasm…	GO:0003735 structural constituent of ribosome; GO:0005198 structural molecule activity;	bdi:100831273; 40S ribosomal protein S28; K02979 small subunit ribosomal protein S28e (A)	ko03010 Ribosome;	J	40S ribosomal protein S28
F01_cb8001_c19/f5p1/1837	PREDICTED: UDP-glycosyltransferase 73B4 OS=Arabidopsis thaliana GN=UGT73B4 PE=2 SV=1	0.289	Down	0.0196039	0.42	Down	0.00066254	2.108	Up	0.0135984	1.45	--	0.18742	GO:0008152 metabolic process;	--	GO:0016757 transferase activity, transferring glycosyl groups; GO:0016758 transferase activity, transferring hexosyl groups; GO:0003824 catalytic activity; GO:0016740 transferase activity;	vvi:100262460; zeatin O-glucosyltransferase-like; K13495 cis-zeatin O-glucosyltransferase [EC:2.4.1.215] (A)	ko00908 Zeatin biosynthesis;	GC	UDP-glucuronosyl and UDP-glucosyl transferase
F01_cb8211_c3/f1p0/1429	unknown [Picea sitchensis]	0.652	Down	0.0024586	1.086	--	0.84666	0.591	--	0.09634	0.355	Down	0.04882	--	--	GO:0016787 hydrolase activity; GO:0003824 catalytic activity;	--	--	--	--
F02_cb1305_c9/f1p4/1576	PREDICTED: Calreticulin-2 OS=Arabidopsis thaliana GN=CRT2 PE=1 SV=3	1.56	Up	0.021864	0.85	--	0.36026	0.323	Down	0.0021992	0.592	Down	0.0115394	GO:0006457 protein folding; GO:0009987 cellular process;	GO:0043226 organelle; GO:0043231 intracellular membrane-bounded organelle; GO:0043229 intracellular organelle; GO:0005783 endoplasmic reticulum; GO:0044464 cell part; GO:0005622 intracellular; GO:0005737 cytoplasm; GO:0012505 endomembrane system; GO:0044424 intracellular part; GO:0043227 membrane-bounded organelle; GO:0005623 cell; GO:0044444 cytoplasmic part;	GO:0043169 cation binding; GO:0046872 metal ion binding; GO:0005515 protein binding; GO:0005509 calcium ion binding; GO:0051082 unfolded protein binding; GO:0005488 binding; GO:0043167 ion binding;	eus:EUTSA_v10023481mg; hypothetical protein; K08057 calreticulin (A)	ko04141 Protein processing in endoplasmic reticulum; ko04145 Phagosome;	O	Calreticulin
F02_cb4960_c5/f1p0/2214	PREDICTED: probable polyamine oxidase 5-like [Solanum tuberosum]	0.455	Down	0.0055815	--	--	--	--	--	--	--	--	--	GO:0044699 single-organism process; GO:0008152 metabolic process; GO:0055114 oxidation-reduction process; GO:0044710 single-organism metabolic process;	--	GO:0003824 catalytic activity; GO:0016491 oxidoreductase activity;	sot:102603548; probable polyamine oxidase 5-like; K12259 spermine oxidase [EC:1.5.3.16 1.5.3.-] (A)	ko00330 Arginine and proline metabolism; ko00410 beta-Alanine metabolism;	H	Flavin-containing amine oxidase
F01_cb33_c8/f5p0/1694	"""PREDICTED: 3-oxo-Delta(4,5)-steroid 5-beta-reductase OS=Arabidopsis thaliana GN=VEP1 PE=1 SV=1"""	0.127	Down	0.00087886	0.191	Down	0.00145554	4.709	Up	0.00188497	3.135	Up	0.0059958	--	--	GO:0048037 cofactor binding; GO:0003824 catalytic activity; GO:0005488 binding; GO:0050662 coenzyme binding;	--	--	--	--
F01_cb2781_c41/f5p1/2186	PREDICTED: Protein ASPARTIC PROTEASE IN GUARD CELL 1 OS=Arabidopsis thaliana GN=ASPG1 PE=1 SV=1	2.347	Up	0.0157593	--	--	--	--	--	--	--	--	--	GO:0006508 proteolysis; GO:0008152 metabolic process; GO:0043170 macromolecule metabolic process; GO:0019538 protein metabolic process; GO:0044238 primary metabolic process; GO:0071704 organic substance metabolic process;	--	GO:0004175 endopeptidase activity; GO:0008233 peptidase activity; GO:0003824 catalytic activity; GO:0004190 aspartic-type endopeptidase activity; GO:0070011 peptidase activity, acting on L-amino acid peptides; GO:0016787 hydrolase activity; GO:0070001 aspartic-type peptidase activity;	--	--	O	Aspartyl protease
F01_cb5000_c12497/f2p1/2961	hypothetical protein PRUPE_ppa000146mg [Prunus persica]	0.802	Down	0.040602	--	--	--	--	--	--	--	--	--	GO:0043648 dicarboxylic acid metabolic process; GO:0016053 organic acid biosynthetic process; GO:0044699 single-organism process; GO:0009058 biosynthetic process; GO:1901566 organonitrogen compound biosynthetic process; GO:0044237 cellular metabolic process; GO:0009084 glutamine family amino acid biosynthetic process; GO:0071704 organic substance metabolic process; GO:0008152 metabolic process; G…	--	GO:0015930 glutamate synthase activity; GO:0016638 oxidoreductase activity, acting on the CH-NH2 group of donors; GO:0003824 catalytic activity; GO:0016491 oxidoreductase activity;	atr:s00063p00191490; AMTR_s00063p00191490; hypothetical protein; K00284 glutamate synthase (ferredoxin) [EC:1.4.7.1] (A)	ko00910 Nitrogen metabolism; ko00630 Glyoxylate and dicarboxylate metabolism;	E	Glutamate synthase
F01_cb2364_c15/f1p0/3046	exportin1 family protein [Populus trichocarpa]	0.68	Down	0.0182959	0.998	--	0.97196	2.169	Up	0.00049547	1.477	Up	0.0134842	--	--	GO:0005488 binding;	pop:POPTR_0013s09680g; POPTRDRAFT_774005; exportin1 family protein; K14290 exportin-1 (A)	ko03008 Ribosome biogenesis in eukaryotes; ko03013 RNA transport;	YU	Nuclear transport receptor CRM1/MSN5 (importin beta superfamily)
F01_cb1402_c3/f1p0/3255	hypothetical protein JCGZ_23555 [Jatropha curcas]	0.186	Down	0.00073803	--	--	--	--	--	--	--	--	--	--	--	GO:0005515 protein binding; GO:0005488 binding;	--	--	R	Ankyrin repeat protein
F02_cb15763_c0/f2p0/1032	PREDICTED: haloacid dehalogenase-like hydrolase domain-containing protein 3 [Phoenix dactylifera]	1.518	Up	0.030722	1.752	Up	0.0133601	0.776	--	0.09704	0.672	--	0.050382	GO:0008152 metabolic process;	--	GO:0016787 hydrolase activity; GO:0003824 catalytic activity;	--	--	R	Predicted hydrolase (HAD superfamily)
F01_cb4643_c1/f1p0/2643	unknown [Picea sitchensis]	2.553	Up	0.0069379	--	--	--	--	--	--	--	--	--	--	GO:0016020 membrane; GO:0043229 intracellular organelle; GO:0005783 endoplasmic reticulum; GO:0042175 nuclear outer membrane-endoplasmic reticulum membrane network; GO:0005737 cytoplasm; GO:0044446 intracellular organelle part; GO:0012505 endomembrane system; GO:0031224 intrinsic component of membrane; GO:0032991 macromolecular complex; GO:0044424 intracellular part; GO:0005623 cell; GO:0016021 i…	--	mus:104000615; glycosylphosphatidylinositol anchor attachment 1 protein-like; K05289 glycosylphosphatidylinositol transamidase (A)	ko00563 Glycosylphosphatidylinositol(GPI)-anchor biosynthesis;	O	Glycosylphosphatidylinositol anchor attachment protein GAA1
F02_cb8251_c10/f1p0/926	PREDICTED: Protein RER1B OS=Arabidopsis thaliana GN=RER1B PE=1 SV=2	2.1	Up	0.0083248	1.454	Up	0.049639	0.489	Down	0.0031248	0.707	--	0.122298	--	GO:0031224 intrinsic component of membrane; GO:0016020 membrane; GO:0016021 integral component of membrane; GO:0044425 membrane part;	--	--	--	U	Golgi proteins involved in ER retention (RER)
F01_cb15069_c1/f1p1/1241	unknown [Picea sitchensis]	0.563	Down	0.0079203	0.326	Down	0.0070953	0.492	Down	0.031883	0.849	--	0.22052	GO:1901606 alpha-amino acid catabolic process; GO:0006725 cellular aromatic compound metabolic process; GO:0044699 single-organism process; GO:0044237 cellular metabolic process; GO:0071704 organic substance metabolic process; GO:0006576 cellular biogenic amine metabolic process; GO:0044270 cellular nitrogen compound catabolic process; GO:0008152 metabolic process; GO:0006520 cellular amino acid …	--	GO:0016787 hydrolase activity; GO:0016811 hydrolase activity, acting on carbon-nitrogen (but not peptide) bonds, in linear amides; GO:0004061 arylformamidase activity; GO:0003824 catalytic activity; GO:0016810 hydrolase activity, acting on carbon-nitrogen (but not peptide) bonds;	--	--	--	--
F01_cb11376_c0/f4p0/747	PREDICTED: NADH dehydrogenase [ubiquinone] 1 beta subcomplex subunit 9 OS=Arabidopsis thaliana GN=CIB22 PE=1 SV=1	0.228	Down	0.0171805	0.164	Down	0.00029917	0.706	--	0.37426	0.982	--	0.92444	--	--	--	sbi:SORBI_10g030030; SORBIDRAFT_10g030030, Sb10g030030; hypothetical protein; K03965 NADH dehydrogenase (ubiquinone) 1 beta subcomplex subunit 9 (A)	ko00190 Oxidative phosphorylation;	C	NADH:ubiquinone oxidoreductase, NDUFB9/B22 subunit
F01_cb3534_c0/f4p0/2556	hypothetical protein AMTR_s00058p00148900 [Amborella trichopoda]	0.794	Down	0.033203	0.78	--	0.29426	0.985	--	0.8015	1.003	--	0.96944	--	--	GO:0097159 organic cyclic compound binding; GO:1901363 heterocyclic compound binding; GO:0003723 RNA binding; GO:0005488 binding; GO:0003676 nucleic acid binding;	--	--	AR	PolyC-binding proteins alphaCP-1 and related KH domain proteins
F02_cb15342_c1/f1p0/1124	PREDICTED: uncharacterized protein LOC104604615 isoform X1 [Nelumbo nucifera]	1.806	Up	0.00135863	1.877	Up	0.0132221	1.333	--	0.140959	1.283	Up	0.020097	--	--	--	--	--	O	Inner membrane protein required for assembly of the F0 sector of ATP synthase
F01_cb7908_c1/f1p0/1790	PREDICTED: abscisic acid receptor PYL8-like [Nelumbo nucifera]	0.545	Down	0.00174493	--	--	--	--	--	--	--	--	--	--	--	--	tcc:TCM_016450; Regulatory components of ABA receptor 3; K14496 abscisic acid receptor PYR/PYL family (A)	ko04075 Plant hormone signal transduction;	--	--
F01_cb15522_c11/f4p0/936	PREDICTED: Universal stress protein PHOS32 OS=Arabidopsis thaliana GN=PHOS32 PE=1 SV=1	2.503	Up	0.0033013	2.054	Up	0.000176112	1.326	Up	0.0188	1.616	Up	0.023344	GO:0006950 response to stress; GO:0050896 response to stimulus;	--	--	--	--	--	--
F02_cb12985_c6/f1p0/976	glutathione peroxidase [Pinus massoniana]	1.598	Up	0.0118166	1.662	Up	0.00056314	0.592	Down	0.0040448	0.569	Down	0.0021439	GO:0008152 metabolic process; GO:0006950 response to stress; GO:0055114 oxidation-reduction process; GO:0044710 single-organism metabolic process; GO:0006979 response to oxidative stress; GO:0044699 single-organism process; GO:0050896 response to stimulus;	--	GO:0016209 antioxidant activity; GO:0004601 peroxidase activity; GO:0004602 glutathione peroxidase activity; GO:0003824 catalytic activity; GO:0016491 oxidoreductase activity; GO:0016684 oxidoreductase activity, acting on peroxide as acceptor;	atr:s00009p00255140; AMTR_s00009p00255140; hypothetical protein; K00432 glutathione peroxidase [EC:1.11.1.9] (A)	ko00590 Arachidonic acid metabolism; ko00480 Glutathione metabolism;	O	Glutathione peroxidase
F02_cb8216_c2/f1p0/2160	predicted protein [Physcomitrella patens]	0.563	Down	0.0104965	1.349	Up	0.028063	2.543	Up	0.000182168	1.062	--	0.64634	GO:0005986 sucrose biosynthetic process; GO:0016051 carbohydrate biosynthetic process; GO:0044711 single-organism biosynthetic process; GO:0044763 single-organism cellular process; GO:0044699 single-organism process; GO:0009058 biosynthetic process; GO:0005984 disaccharide metabolic process; GO:0005975 carbohydrate metabolic process; GO:0044238 primary metabolic process; GO:0009312 oligosaccharid…	--	GO:0000287 magnesium ion binding; GO:0050307 sucrose-phosphate phosphatase activity; GO:0019203 carbohydrate phosphatase activity; GO:0003824 catalytic activity; GO:0042578 phosphoric ester hydrolase activity; GO:0016791 phosphatase activity; GO:0005488 binding; GO:0016788 hydrolase activity, acting on ester bonds; GO:0043167 ion binding; GO:0046872 metal ion binding; GO:0043169 cation binding; G…	--	--	--	--
F01_cb10445_c13/f1p0/814	putative phytocyanin [Pinus nigra]	1.943	Up	0.034324	1.382	--	0.142621	0.393	Down	0.0024622	0.552	--	0.089936	--	--	GO:0009055 electron carrier activity;	--	--	--	--
F01_cb5000_c62582/f3p1/2651	hypothetical protein AMTR_s00011p00252750 [Amborella trichopoda]	0.066	Down	0.00069626	--	--	--	--	--	--	--	--	--	GO:0008152 metabolic process; GO:0005975 carbohydrate metabolic process; GO:0044238 primary metabolic process; GO:0071704 organic substance metabolic process;	--	GO:0004553 hydrolase activity, hydrolyzing O-glycosyl compounds; GO:0016787 hydrolase activity; GO:0003824 catalytic activity; GO:0016798 hydrolase activity, acting on glycosyl bonds;	atr:s00011p00252750; AMTR_s00011p00252750; hypothetical protein; K01193 beta-fructofuranosidase [EC:3.2.1.26] (A)	ko00500 Starch and sucrose metabolism; ko00052 Galactose metabolism;	G	Beta-fructofuranosidase (invertase)
F02_cb11523_c5/f1p0/1304	PREDICTED: Eukaryotic translation initiation factor NCBP OS=Triticum aestivum GN=NCBP PE=2 SV=1	1.321	Up	0.043942	1.371	--	0.084181	0.978	--	0.84432	0.942	--	0.42866	GO:0006518 peptide metabolic process; GO:0043043 peptide biosynthetic process; GO:0044267 cellular protein metabolic process; GO:0006807 nitrogen compound metabolic process; GO:0009058 biosynthetic process; GO:0043603 cellular amide metabolic process; GO:0044238 primary metabolic process; GO:1901566 organonitrogen compound biosynthetic process; GO:0044237 cellular metabolic process; GO:1901576 or…	GO:0044424 intracellular part; GO:0005623 cell; GO:0044464 cell part; GO:0005622 intracellular; GO:0005737 cytoplasm;	GO:0097159 organic cyclic compound binding; GO:1901363 heterocyclic compound binding; GO:0003723 RNA binding; GO:0008135 translation factor activity, RNA binding; GO:0005488 binding; GO:0003676 nucleic acid binding; GO:0003743 translation initiation factor activity;	gmx:100499744; uncharacterized LOC100499744; K03259 translation initiation factor 4E (A)	ko03013 RNA transport;	J	Predicted mRNA cap-binding protein related to eIF-4E
F01_cb4161_c2/f1p0/1939	"""peptidase, putative [Ricinus communis]"""	2.242	Up	0.00050269	1.446	Up	0.0184439	0.684	Down	0.0093026	1.061	--	0.5363	GO:0006508 proteolysis; GO:0008152 metabolic process; GO:0043170 macromolecule metabolic process; GO:0019538 protein metabolic process; GO:0044238 primary metabolic process; GO:0071704 organic substance metabolic process;	--	GO:0004175 endopeptidase activity; GO:0004222 metalloendopeptidase activity; GO:0008233 peptidase activity; GO:0003824 catalytic activity; GO:0070011 peptidase activity, acting on L-amino acid peptides; GO:0016787 hydrolase activity; GO:0008237 metallopeptidase activity;	--	--	O	Peptidase family M48
F02_cb15214_c1/f1p0/711	PREDICTED: Probable signal peptidase complex subunit 1 OS=Arabidopsis thaliana GN=At2g22425 PE=2 SV=1	2.429	Up	0.036341	1.477	Up	0.042163	0.266	Down	0.00067969	0.437	--	0.074919	GO:0006518 peptide metabolic process; GO:0006465 signal peptide processing; GO:0044267 cellular protein metabolic process; GO:0006807 nitrogen compound metabolic process; GO:0016485 protein processing; GO:0043603 cellular amide metabolic process; GO:0044238 primary metabolic process; GO:0044237 cellular metabolic process; GO:0071704 organic substance metabolic process; GO:0008152 metabolic proces…	GO:0043229 intracellular organelle; GO:0016020 membrane; GO:0005783 endoplasmic reticulum; GO:0042175 nuclear outer membrane-endoplasmic reticulum membrane network; GO:0098796 membrane protein complex; GO:0005737 cytoplasm; GO:0044446 intracellular organelle part; GO:0012505 endomembrane system; GO:0032991 macromolecular complex; GO:0031224 intrinsic component of membrane; GO:0044424 intracellula…	GO:0008233 peptidase activity; GO:0016787 hydrolase activity; GO:0003824 catalytic activity;	brp:103854917; probable signal peptidase complex subunit 1; K12946 signal peptidase complex subunit 1 [EC:3.4.-.-] (A)	ko03060 Protein export;	--	--
F02_cb11836_c10/f1p1/1680	hypothetical protein SORBIDRAFT_03g040990 [Sorghum bicolor]	1.779	Up	0.029538	1.397	Up	0.0096392	0.567	Down	0.0132445	0.721	--	0.079596	--	GO:0016020 membrane;	--	--	--	S	Uncharacterized conserved protein
F01_cb14101_c0/f4p0/1173	hypothetical protein AMTR_s00019p00221860 [Amborella trichopoda]	0.366	Down	8.19e-05	0.269	Down	0.0056422	0.689	--	0.199757	0.94	--	0.60062	GO:0008152 metabolic process;	--	GO:0016787 hydrolase activity; GO:0003824 catalytic activity;	--	--	R	Predicted haloacid-halidohydrolase and related hydrolases
F01_cb15841_c1/f1p0/1364	PREDICTED: Thiamine pyrophosphokinase 1 OS=Oryza sativa subsp. japonica GN=TPK1 PE=2 SV=1	0.344	Down	0.0095569	0.948	--	0.72946	2.505	Up	0.0029	0.91	--	0.75082	GO:0051188 cofactor biosynthetic process; GO:0006725 cellular aromatic compound metabolic process; GO:0044699 single-organism process; GO:0009058 biosynthetic process; GO:0009229 thiamine diphosphate biosynthetic process; GO:1901566 organonitrogen compound biosynthetic process; GO:0006772 thiamine metabolic process; GO:0044237 cellular metabolic process; GO:0006796 phosphate-containing compound m…	--	GO:0030975 thiamine binding; GO:0005524 ATP binding; GO:1901265 nucleoside phosphate binding; GO:0019842 vitamin binding; GO:0001882 nucleoside binding; GO:0043167 ion binding; GO:0000166 nucleotide binding; GO:1901681 sulfur compound binding; GO:1901363 heterocyclic compound binding; GO:0097159 organic cyclic compound binding; GO:0032549 ribonucleoside binding; GO:0097367 carbohydrate derivative…	cit:102620459; thiamine pyrophosphokinase 1-like; K00949 thiamine pyrophosphokinase [EC:2.7.6.2] (A)	ko00730 Thiamine metabolism;	H	Thiamine pyrophosphokinase
F01_cb15172_c0/f1p0/1106	PREDICTED: GDSL esterase/lipase At4g01130 OS=Arabidopsis thaliana GN=At4g01130 PE=2 SV=1	4.028	Up	0.0046408	1.721	--	0.17832	0.286	Down	0.0086976	0.669	--	0.26028	--	--	--	--	--	--	--
F02_cb10002_c21/f1p0/1156	tau class glutathione S-transferase [Pinus tabuliformis]	1.237	Up	0.029997	1.195	--	0.34086	3.822	Up	0.000141701	3.956	Up	0.00135632	--	--	GO:0005515 protein binding; GO:0005488 binding;	gmx:547597; In2-1 protein; K00799 glutathione S-transferase [EC:2.5.1.18] (A)	ko00480 Glutathione metabolism;	O	Glutathione S-transferase
F02_cb535_c27/f1p0/4269	hypothetical protein AMTR_s00009p00260060 [Amborella trichopoda]	1.795	Up	0.031319	--	--	--	--	--	--	--	--	--	GO:0006810 transport; GO:0055085 transmembrane transport; GO:0006813 potassium ion transport; GO:0006812 cation transport; GO:0006811 ion transport; GO:0030001 metal ion transport; GO:0051179 localization; GO:0015672 monovalent inorganic cation transport; GO:0051234 establishment of localization;	GO:0031224 intrinsic component of membrane; GO:0016020 membrane; GO:0016021 integral component of membrane; GO:0044425 membrane part;	GO:0015298 solute:cation antiporter activity; GO:0022804 active transmembrane transporter activity; GO:0015291 secondary active transmembrane transporter activity; GO:0015075 ion transmembrane transporter activity; GO:0015299 solute:proton antiporter activity; GO:0022892 substrate-specific transporter activity; GO:0015077 monovalent inorganic cation transmembrane transporter activity; GO:0022890 …	--	--	P	Predicted K+/H+-antiporter
F02_cb13655_c3/f1p0/1215	PREDICTED: Peptide methionine sulfoxide reductase OS=Lactuca sativa PE=2 SV=1	0.538	Down	0.028539	0.967	--	0.74548	1.796	Up	0.0053386	1	--	0.90214	GO:0044699 single-organism process; GO:0008152 metabolic process; GO:0055114 oxidation-reduction process; GO:0044710 single-organism metabolic process;	--	GO:0016667 oxidoreductase activity, acting on a sulfur group of donors; GO:0008113 peptide-methionine (S)-S-oxide reductase activity; GO:0016671 oxidoreductase activity, acting on a sulfur group of donors, disulfide as acceptor; GO:0003824 catalytic activity; GO:0016491 oxidoreductase activity;	--	--	O	Peptide methionine sulfoxide reductase
F02_cb15238_c1/f1p0/1239	unknown [Picea sitchensis]	0.41	Down	0.013641	0.764	Down	0.046483	2.253	Up	0.0034161	1.209	--	0.30432	GO:0044267 cellular protein metabolic process; GO:0044238 primary metabolic process; GO:0006470 protein dephosphorylation; GO:0016311 dephosphorylation; GO:0044237 cellular metabolic process; GO:0006796 phosphate-containing compound metabolic process; GO:0071704 organic substance metabolic process; GO:0008152 metabolic process; GO:0006793 phosphorus metabolic process; GO:0044260 cellular macromol…	--	GO:0016787 hydrolase activity; GO:0004721 phosphoprotein phosphatase activity; GO:0004725 protein tyrosine phosphatase activity; GO:0003824 catalytic activity; GO:0042578 phosphoric ester hydrolase activity; GO:0016791 phosphatase activity; GO:0016788 hydrolase activity, acting on ester bonds;	--	--	T	Protein tyrosine phosphatase
F02_cb12393_c3/f1p0/693	unknown [Picea sitchensis]	1.894	Up	0.047219	1.512	--	0.122256	0.768	--	0.180959	0.962	--	0.98774	--	--	--	--	--	--	--
F02_cb2889_c29/f2p1/4879	"""PREDICTED: translocase of chloroplast 120, chloroplastic-like isoform X1 [Nelumbo nucifera]"""	1.934	Up	0.0187791	--	--	--	--	--	--	--	--	--	--	--	GO:1901265 nucleoside phosphate binding; GO:0001882 nucleoside binding; GO:0043167 ion binding; GO:0016817 hydrolase activity, acting on acid anhydrides; GO:0016787 hydrolase activity; GO:0000166 nucleotide binding; GO:0097159 organic cyclic compound binding; GO:1901363 heterocyclic compound binding; GO:0032549 ribonucleoside binding; GO:0097367 carbohydrate derivative binding; GO:0003824 catalyt…	--	--	--	--
F01_cb8410_c1/f1p0/1980	PREDICTED: RAN GTPase-activating protein 1 OS=Arabidopsis thaliana GN=RANGAP1 PE=1 SV=1	1.618	Up	0.02298	--	--	--	--	--	--	--	--	--	--	--	GO:0005515 protein binding; GO:0005488 binding;	atr:s00001p00229590; AMTR_s00001p00229590; hypothetical protein; K14319 Ran GTPase-activating protein 1 (A)	ko03013 RNA transport;	AYT	Ran GTPase-activating protein
F01_cb13428_c5/f1p0/956	thaumatin-like protein [Pinus monticola]	1.7	Up	0.0134019	--	--	--	--	--	--	--	--	--	--	--	--	--	--	--	--
F01_cb9785_c15/f1p0/1215	PREDICTED: Mitochondrial fission 1 protein A OS=Arabidopsis thaliana GN=FIS1A PE=1 SV=1	1.78	Up	0.044883	2.269	Up	0.0094583	0.968	--	0.80542	0.759	--	0.27666	GO:0016043 cellular component organization; GO:0006996 organelle organization; GO:0007005 mitochondrion organization; GO:0048285 organelle fission; GO:0009987 cellular process; GO:0000266 mitochondrial fission; GO:0071840 cellular component organization or biogenesis;	--	GO:0005515 protein binding; GO:0005488 binding;	--	--	M	Membrane protein involved in organellar division
F01_cb10191_c17/f1p0/1031	PREDICTED: Small ubiquitin-related modifier 1 OS=Oryza sativa subsp. japonica GN=SUMO1 PE=1 SV=1	0.326	Down	0.0059237	0.323	Down	1.90679e-05	1.065	--	0.39026	1.073	--	0.62598	--	--	GO:0005515 protein binding; GO:0005488 binding;	atr:s00228p00023500; AMTR_s00228p00023500; hypothetical protein; K12160 small ubiquitin-related modifier (A)	ko03013 RNA transport;	O	Ubiquitin-like proteins
F02_cb11727_c0/f3p0/1030	"""PREDICTED: Light-harvesting complex-like protein OHP2, chloroplastic OS=Arabidopsis thaliana GN=OHP2 PE=2 SV=1"""	1.672	Up	0.047804	1.594	--	0.5212	1.151	--	0.98184	1.208	--	0.3464	--	--	--	--	--	--	--
F02_cb15950_c1/f1p0/3149	unknown [Picea sitchensis]	1.964	Up	0.029936	--	--	--	--	--	--	--	--	--	--	--	--	--	--	D	Microtubule severing protein katanin p80 subunit B (contains WD40 repeats)
F01_cb13225_c1/f1p0/1121	unknown [Picea sitchensis]	1.481	Up	0.027316	0.542	--	0.12526	0.731	--	0.162163	1.996	--	0.068196	GO:0006810 transport; GO:0051179 localization; GO:0051234 establishment of localization;	GO:0005623 cell; GO:0005622 intracellular; GO:0044464 cell part;	--	--	--	--	--
F02_cb6130_c4/f5p1/1921	PREDICTED: Pectin acetylesterase 8 OS=Arabidopsis thaliana GN=PAE8 PE=2 SV=1	2.149	Up	0.043823	1.446	Up	0.003605	0.209	Down	5.8357e-05	0.31	--	0.061683	--	--	GO:0016787 hydrolase activity; GO:0003824 catalytic activity;	--	--	M	Pectin acetylesterase and similar proteins
F01_cb2073_c12/f1p0/2699	PREDICTED: urease isoform X1 [Nelumbo nucifera]	0.569	Down	0.030738	0.911	--	0.20962	2.274	Up	0.00023679	1.421	--	0.08568	GO:0019627 urea metabolic process; GO:0044712 single-organism catabolic process; GO:0044281 small molecule metabolic process; GO:0044763 single-organism cellular process; GO:0006807 nitrogen compound metabolic process; GO:0044699 single-organism process; GO:0044282 small molecule catabolic process; GO:0043603 cellular amide metabolic process; GO:0044237 cellular metabolic process; GO:0043419 urea…	--	GO:0046914 transition metal ion binding; GO:0003824 catalytic activity; GO:0005488 binding; GO:0043167 ion binding; GO:0046872 metal ion binding; GO:0043169 cation binding; GO:0016787 hydrolase activity; GO:0009039 urease activity; GO:0016811 hydrolase activity, acting on carbon-nitrogen (but not peptide) bonds, in linear amides; GO:0016151 nickel cation binding; GO:0016810 hydrolase activity, ac…	mus:103997200; urease; K01427 urease [EC:3.5.1.5] (A)	ko00230 Purine metabolism; ko00330 Arginine and proline metabolism;	--	--
F02_cb9966_c52/f1p0/780	"""Translation initiation factor SUI1 family protein, putative [Theobroma cacao]"""	1.529	Up	0.0137196	--	--	--	--	--	--	--	--	--	GO:0006518 peptide metabolic process; GO:0043043 peptide biosynthetic process; GO:0044267 cellular protein metabolic process; GO:0006807 nitrogen compound metabolic process; GO:0009058 biosynthetic process; GO:0043603 cellular amide metabolic process; GO:0044238 primary metabolic process; GO:1901566 organonitrogen compound biosynthetic process; GO:0044237 cellular metabolic process; GO:1901576 or…	--	GO:0097159 organic cyclic compound binding; GO:1901363 heterocyclic compound binding; GO:0003723 RNA binding; GO:0008135 translation factor activity, RNA binding; GO:0005488 binding; GO:0003676 nucleic acid binding; GO:0003743 translation initiation factor activity;	tcc:TCM_031068; Translation initiation factor SUI1 family protein, putative; K03113 translation initiation factor 1 (A)	ko03013 RNA transport;	--	--
F02_cb2615_c17/f1p0/2699	PREDICTED: uncharacterized protein LOC104593008 [Nelumbo nucifera]	1.734	Up	0.044197	0.734	--	0.068064	0.461	Down	0.0118	1.088	--	0.546	--	--	GO:0005488 binding;	--	--	T	Neoplastic transformation suppressor Pdcd4/MA-3, contains MA3 domain
F01_cb7479_c20/f1p0/1871	"""PREDICTED: Glucose-6-phosphate/phosphate translocator 2, chloroplastic OS=Arabidopsis thaliana GN=GPT2 PE=2 SV=2"""	1.974	Up	0.026418	--	--	--	--	--	--	--	--	--	--	--	--	--	--	GE	Glucose-6-phosphate/phosphate and phosphoenolpyruvate/phosphate antiporter
F01_cb11222_c12/f1p1/1581	"""PREDICTED: Biotin carboxyl carrier protein of acetyl-CoA carboxylase 1, chloroplastic OS=Arabidopsis thaliana GN=BCCP1 PE=1 SV=2"""	0.576	Down	0.0039248	0.881	--	0.4033	2.285	Up	0.0061978	1.493	Up	0.003257	GO:0044711 single-organism biosynthetic process; GO:0016053 organic acid biosynthetic process; GO:0044281 small molecule metabolic process; GO:0044763 single-organism cellular process; GO:0044699 single-organism process; GO:0009058 biosynthetic process; GO:0044255 cellular lipid metabolic process; GO:0006631 fatty acid metabolic process; GO:0044238 primary metabolic process; GO:0044237 cellular m…	GO:1902494 catalytic complex; GO:0009317 acetyl-CoA carboxylase complex; GO:0044464 cell part; GO:0005622 intracellular; GO:0005737 cytoplasm; GO:0032991 macromolecular complex; GO:0044424 intracellular part; GO:0005623 cell; GO:0044444 cytoplasmic part;	GO:0003989 acetyl-CoA carboxylase activity; GO:0016421 CoA carboxylase activity; GO:0003824 catalytic activity; GO:0016885 ligase activity, forming carbon-carbon bonds; GO:0016874 ligase activity;	vvi:100254365; biotin carboxyl carrier protein of acetyl-CoA carboxylase 2, chloroplastic; K02160 acetyl-CoA carboxylase biotin carboxyl carrier protein (A)	ko01200 Carbon metabolism; ko00061 Fatty acid biosynthesis; ko01212 Fatty acid metabolism; ko00620 Pyruvate metabolism; ko00640 Propanoate metabolism;	--	--
F02_cb15897_c0/f1p0/1340	conserved hypothetical protein [Ricinus communis]	0.446	Down	0.00059788	--	--	--	--	--	--	--	--	--	--	--	--	--	--	--	--
F02_cb15235_c2/f1p0/1634	unknown [Picea sitchensis]	0.694	Down	0.0181399	0.958	--	0.72088	0.603	Down	0.0095631	0.437	Down	0.00096128	GO:0044723 single-organism carbohydrate metabolic process; GO:0008152 metabolic process; GO:0044710 single-organism metabolic process; GO:0044281 small molecule metabolic process; GO:0005996 monosaccharide metabolic process; GO:0044699 single-organism process; GO:0044238 primary metabolic process; GO:0005975 carbohydrate metabolic process; GO:0019318 hexose metabolic process; GO:0071704 organic s…	--	GO:0030246 carbohydrate binding; GO:0016853 isomerase activity; GO:0003824 catalytic activity; GO:0005488 binding;	pda:103703395; aldose 1-epimerase-like; K01785 aldose 1-epimerase [EC:5.1.3.3] (A)	ko00010 Glycolysis / Gluconeogenesis; ko00052 Galactose metabolism;	G	Predicted mutarotase
F02_cb13126_c1/f1p0/1032	unknown [Picea sitchensis]	0.733	Down	0.040538	0.766	--	0.114701	0.779	--	0.194605	0.745	Down	0.0086628	GO:0006518 peptide metabolic process; GO:0006414 translational elongation; GO:0043043 peptide biosynthetic process; GO:0044267 cellular protein metabolic process; GO:0006807 nitrogen compound metabolic process; GO:0009058 biosynthetic process; GO:0043603 cellular amide metabolic process; GO:0044238 primary metabolic process; GO:1901566 organonitrogen compound biosynthetic process; GO:1901576 orga…	--	GO:0097159 organic cyclic compound binding; GO:1901363 heterocyclic compound binding; GO:0003723 RNA binding; GO:0008135 translation factor activity, RNA binding; GO:0003746 translation elongation factor activity; GO:0005488 binding; GO:0003676 nucleic acid binding;	--	--	--	--
F01_cb9952_c4/f1p0/674	"""PREDICTED: Cell division topological specificity factor homolog, chloroplastic OS=Arabidopsis thaliana GN=MINE1 PE=1 SV=1"""	1.399	Up	0.0192647	1.014	--	0.85116	0.612	Down	0.0033421	0.845	--	0.154216	GO:0050794 regulation of cellular process; GO:0007346 regulation of mitotic cell cycle; GO:0044763 single-organism cellular process; GO:0044699 single-organism process; GO:0044087 regulation of cellular component biogenesis; GO:0032954 regulation of cytokinetic process; GO:1901891 regulation of cell septum assembly; GO:0010564 regulation of cell cycle process; GO:0032465 regulation of cytokinesis…	--	--	--	--	--	--
F01_cb14887_c4/f1p0/1503	PREDICTED: Inactive LRR receptor-like serine/threonine-protein kinase BIR2 OS=Arabidopsis thaliana GN=BIR2 PE=1 SV=1	2.673	Up	0.0044637	--	--	--	--	--	--	--	--	--	--	--	GO:0005515 protein binding; GO:0005488 binding;	--	--	R	FOG: Leucine rich repeat
F02_cb11281_c5/f1p0/1022	PREDICTED: Peroxidase 53 OS=Arabidopsis thaliana GN=PER53 PE=1 SV=1	3.34	Up	0.0049818	2.376	Up	0.047564	0.241	Down	0.0051617	0.339	Down	0.0158014	GO:0008152 metabolic process; GO:0042743 hydrogen peroxide metabolic process; GO:0006950 response to stress; GO:0072593 reactive oxygen species metabolic process; GO:0055114 oxidation-reduction process; GO:0044710 single-organism metabolic process; GO:0006979 response to oxidative stress; GO:0044699 single-organism process; GO:0044248 cellular catabolic process; GO:0050896 response to stimulus; G…	--	GO:0097159 organic cyclic compound binding; GO:1901363 heterocyclic compound binding; GO:0020037 heme binding; GO:0003824 catalytic activity; GO:0005488 binding; GO:0016209 antioxidant activity; GO:0004601 peroxidase activity; GO:0046906 tetrapyrrole binding; GO:0016491 oxidoreductase activity; GO:0016684 oxidoreductase activity, acting on peroxide as acceptor;	pda:103703770; peroxidase 72-like; K00430 peroxidase [EC:1.11.1.7] (A)	ko00940 Phenylpropanoid biosynthesis; ko00360 Phenylalanine metabolism;	--	--
F02_cb8622_c9/f1p1/1112	PREDICTED: Probable phospholipid hydroperoxide glutathione peroxidase OS=Citrus sinensis GN=CSA PE=1 SV=1	7.06	Up	0.000135765	9.465	Up	1.6467e-06	0.807	--	0.078317	0.602	Down	0.0137788	GO:0008152 metabolic process; GO:0006950 response to stress; GO:0055114 oxidation-reduction process; GO:0044710 single-organism metabolic process; GO:0006979 response to oxidative stress; GO:0044699 single-organism process; GO:0050896 response to stimulus;	--	GO:0016209 antioxidant activity; GO:0004601 peroxidase activity; GO:0004602 glutathione peroxidase activity; GO:0003824 catalytic activity; GO:0016491 oxidoreductase activity; GO:0016684 oxidoreductase activity, acting on peroxide as acceptor;	atr:s00009p00255140; AMTR_s00009p00255140; hypothetical protein; K00432 glutathione peroxidase [EC:1.11.1.9] (A)	ko00590 Arachidonic acid metabolism; ko00480 Glutathione metabolism;	O	Glutathione peroxidase
F01_cb5000_c43706/f6p1/2533	PREDICTED: Cysteine-rich receptor-like protein kinase 2 OS=Arabidopsis thaliana GN=CRK2 PE=2 SV=1	1.846	Up	0.033945	--	--	--	--	--	--	--	--	--	GO:0016310 phosphorylation; GO:0044267 cellular protein metabolic process; GO:0044238 primary metabolic process; GO:0044237 cellular metabolic process; GO:0006796 phosphate-containing compound metabolic process; GO:0071704 organic substance metabolic process; GO:0008152 metabolic process; GO:0006468 protein phosphorylation; GO:0006793 phosphorus metabolic process; GO:0044260 cellular macromolecul…	--	GO:0005524 ATP binding; GO:1901265 nucleoside phosphate binding; GO:0016773 phosphotransferase activity, alcohol group as acceptor; GO:0001882 nucleoside binding; GO:0043167 ion binding; GO:0004672 protein kinase activity; GO:0000166 nucleotide binding; GO:0097159 organic cyclic compound binding; GO:1901363 heterocyclic compound binding; GO:0032549 ribonucleoside binding; GO:0097367 carbohydrate …	--	--	T	Serine/threonine protein kinase
F02_cb11310_c1/f1p0/886	heat shock protein 17.0 [Picea glauca]	1.724	Up	0.00162116	1.211	--	0.39836	0.979	--	0.81116	1.394	--	0.132141	--	--	--	atr:s00009p00236890; AMTR_s00009p00236890; hypothetical protein; K13993 HSP20 family protein (A)	ko04141 Protein processing in endoplasmic reticulum;	O	Molecular chaperone (small heat-shock protein Hsp26/Hsp42)
F01_cb8004_c11/f1p0/1605	"""PREDICTED: Quinone oxidoreductase-like protein At1g23740, chloroplastic OS=Arabidopsis thaliana GN=At1g23740 PE=2 SV=2"""	0.619	Down	0.0054821	1.062	--	0.64568	2.047	Up	0.000141444	1.194	--	0.3907	GO:0044699 single-organism process; GO:0008152 metabolic process; GO:0055114 oxidation-reduction process; GO:0044710 single-organism metabolic process;	--	GO:0003824 catalytic activity; GO:0016491 oxidoreductase activity;	--	--	CR	Zinc-binding oxidoreductase
F02_cb1414_c29/f1p1/4112	PREDICTED: callose synthase 10 [Nelumbo nucifera]	2.147	Up	0.0041995	--	--	--	--	--	--	--	--	--	GO:0016051 carbohydrate biosynthetic process; GO:0006074 (1->3)-beta-D-glucan metabolic process; GO:0044711 single-organism biosynthetic process; GO:0006073 cellular glucan metabolic process; GO:0000271 polysaccharide biosynthetic process; GO:0044042 glucan metabolic process; GO:0044763 single-organism cellular process; GO:0044699 single-organism process; GO:0033692 cellular polysaccharide biosyn…	GO:0016020 membrane; GO:1902494 catalytic complex; GO:0044459 plasma membrane part; GO:0044425 membrane part; GO:0044464 cell part; GO:0071944 cell periphery; GO:0032991 macromolecular complex; GO:1990234 transferase complex; GO:0005623 cell; GO:0000148 1,3-beta-D-glucan synthase complex; GO:0005886 plasma membrane;	GO:0016758 transferase activity, transferring hexosyl groups; GO:0003824 catalytic activity; GO:0035251 UDP-glucosyltransferase activity; GO:0008194 UDP-glycosyltransferase activity; GO:0046527 glucosyltransferase activity; GO:0016757 transferase activity, transferring glycosyl groups; GO:0003843 1,3-beta-D-glucan synthase activity; GO:0016740 transferase activity;	--	--	M	1,3-beta-glucan synthase/callose synthase catalytic subunit
F01_cb7319_c3/f1p0/1976	hypothetical protein AMTR_s00058p00188880 [Amborella trichopoda]	0.375	Down	0.0148639	--	--	--	--	--	--	--	--	--	GO:0006508 proteolysis; GO:0008152 metabolic process; GO:0043170 macromolecule metabolic process; GO:0019538 protein metabolic process; GO:0044238 primary metabolic process; GO:0071704 organic substance metabolic process;	--	GO:0004252 serine-type endopeptidase activity; GO:0004175 endopeptidase activity; GO:0008233 peptidase activity; GO:0003824 catalytic activity; GO:0017171 serine hydrolase activity; GO:0005488 binding; GO:0008236 serine-type peptidase activity; GO:0070011 peptidase activity, acting on L-amino acid peptides; GO:0005515 protein binding; GO:0016787 hydrolase activity;	--	--	O	Serine protease
F01_cb7757_c6/f3p3/1935	PREDICTED: Enolase 1 OS=Hevea brasiliensis GN=ENO1 PE=1 SV=1	0.595	Down	0.0127628	0.463	Down	0.0040438	1.293	Up	0.029723	1.662	Up	0.032083	GO:0006757 ATP generation from ADP; GO:0009116 nucleoside metabolic process; GO:0042278 purine nucleoside metabolic process; GO:0006165 nucleoside diphosphate phosphorylation; GO:0046031 ADP metabolic process; GO:0019362 pyridine nucleotide metabolic process; GO:0006096 glycolytic process; GO:0009167 purine ribonucleoside monophosphate metabolic process; GO:0009117 nucleotide metabolic process; G…	GO:1902494 catalytic complex; GO:0044464 cell part; GO:0005622 intracellular; GO:0005737 cytoplasm; GO:0032991 macromolecular complex; GO:0044424 intracellular part; GO:0044445 cytosolic part; GO:0005623 cell; GO:0005829 cytosol; GO:0000015 phosphopyruvate hydratase complex; GO:0044444 cytoplasmic part;	GO:0000287 magnesium ion binding; GO:0004634 phosphopyruvate hydratase activity; GO:0003824 catalytic activity; GO:0005488 binding; GO:0043167 ion binding; GO:0046872 metal ion binding; GO:0043169 cation binding; GO:0016829 lyase activity; GO:0016836 hydro-lyase activity; GO:0016835 carbon-oxygen lyase activity;	smo:SELMODRAFT_167539; hypothetical protein; K01689 enolase [EC:4.2.1.11] (A)	ko00010 Glycolysis / Gluconeogenesis; ko01200 Carbon metabolism; ko03018 RNA degradation; ko01230 Biosynthesis of amino acids;	G	Enolase
F01_cb3754_c5/f1p0/2666	PREDICTED: mediator of RNA polymerase II transcription subunit 15 [Solanum lycopersicum]	0.514	Down	0.0189593	1.264	--	0.117996	2.476	Up	0.002321	1.007	--	0.86762	--	--	--	sly:101255050; mediator of RNA polymerase II transcription subunit 15; K14307 nucleoporin p58/p45 (A)	ko03013 RNA transport;	--	--
F02_cb12111_c2/f1p0/976	PREDICTED: Cytochrome b5 OS=Nicotiana tabacum PE=2 SV=1	2.155	Up	0.0195574	--	--	--	--	--	--	--	--	--	--	--	GO:0097159 organic cyclic compound binding; GO:1901363 heterocyclic compound binding; GO:0020037 heme binding; GO:0046906 tetrapyrrole binding; GO:0005488 binding;	--	--	C	Cytochrome b5
F01_cb1786_c20/f1p0/1885	PREDICTED: Probable sugar phosphate/phosphate translocator At2g25520 OS=Arabidopsis thaliana GN=At2g25520 PE=1 SV=1	2.399	Up	0.0152955	1.681	Up	0.020475	0.501	Down	0.0104417	0.715	--	0.2304	--	--	--	--	--	GE	Glucose-6-phosphate/phosphate and phosphoenolpyruvate/phosphate antiporter
F02_cb13446_c2/f1p0/1612	glycerate oxidase [Pinus pinaster]	9.643	Up	0.000116197	3.903	Up	0.008036	0.726	--	0.24282	1.795	Up	0.03002	GO:0044699 single-organism process; GO:0008152 metabolic process; GO:0055114 oxidation-reduction process; GO:0044710 single-organism metabolic process;	--	GO:0097159 organic cyclic compound binding; GO:1901363 heterocyclic compound binding; GO:0097367 carbohydrate derivative binding; GO:1901265 nucleoside phosphate binding; GO:0003824 catalytic activity; GO:0032553 ribonucleotide binding; GO:0005488 binding; GO:0043167 ion binding; GO:0043168 anion binding; GO:0000166 nucleotide binding; GO:0010181 FMN binding; GO:0048037 cofactor binding; GO:00164…	pda:103705751; peroxisomal (S)-2-hydroxy-acid oxidase GLO5; K11517 (S)-2-hydroxy-acid oxidase [EC:1.1.3.15] (A)	ko04146 Peroxisome; ko00630 Glyoxylate and dicarboxylate metabolism;	C	Glycolate oxidase
F01_cb12994_c6/f1p0/1013	"""PREDICTED: Triosephosphate isomerase, cytosolic OS=Arabidopsis thaliana GN=CTIMC PE=1 SV=2"""	0.136	Down	0.0020609	0.131	Down	0.0119763	1.413	--	0.32056	1.469	--	0.19022	GO:0006757 ATP generation from ADP; GO:0009116 nucleoside metabolic process; GO:0042278 purine nucleoside metabolic process; GO:0006165 nucleoside diphosphate phosphorylation; GO:0046031 ADP metabolic process; GO:0019362 pyridine nucleotide metabolic process; GO:0006096 glycolytic process; GO:0009167 purine ribonucleoside monophosphate metabolic process; GO:0009117 nucleotide metabolic process; G…	--	GO:0016853 isomerase activity; GO:0016860 intramolecular oxidoreductase activity; GO:0004807 triose-phosphate isomerase activity; GO:0003824 catalytic activity; GO:0016861 intramolecular oxidoreductase activity, interconverting aldoses and ketoses;	sot:102577900; triosphosphate isomerase-like protein; K01803 triosephosphate isomerase (TIM) [EC:5.3.1.1] (A)	ko00051 Fructose and mannose metabolism; ko00010 Glycolysis / Gluconeogenesis; ko01200 Carbon metabolism; ko00710 Carbon fixation in photosynthetic organisms; ko01230 Biosynthesis of amino acids; ko00562 Inositol phosphate metabolism;	G	Triosephosphate isomerase
F01_cb3720_c12/f4p0/2241	PREDICTED: Luminal-binding protein 4 OS=Nicotiana tabacum GN=BIP4 PE=2 SV=1	1.264	Up	0.024501	0.771	--	0.27792	0.469	--	0.050745	0.768	--	0.118403	--	--	--	pmum:103337817; luminal-binding protein 5; K09490 heat shock 70kDa protein 5 (A)	ko04141 Protein processing in endoplasmic reticulum; ko03060 Protein export;	O	Molecular chaperones GRP78/BiP/KAR2, HSP70 superfamily
F01_cb6989_c1/f1p1/2058	hypothetical protein CICLE_v10014972mg [Citrus clementina]	0.728	Down	0.038336	0.958	--	0.68462	1.698	Up	0.0055022	1.291	--	0.078303	GO:0000256 allantoin catabolic process; GO:1901360 organic cyclic compound metabolic process; GO:0006807 nitrogen compound metabolic process; GO:0043603 cellular amide metabolic process; GO:0000255 allantoin metabolic process; GO:0044237 cellular metabolic process; GO:0043605 cellular amide catabolic process; GO:0071704 organic substance metabolic process; GO:1901575 organic substance catabolic p…	--	GO:0046914 transition metal ion binding; GO:0003824 catalytic activity; GO:0005488 binding; GO:0050897 cobalt ion binding; GO:0043167 ion binding; GO:0004038 allantoinase activity; GO:0016812 hydrolase activity, acting on carbon-nitrogen (but not peptide) bonds, in cyclic amides; GO:0046872 metal ion binding; GO:0043169 cation binding; GO:0016787 hydrolase activity; GO:0008270 zinc ion binding; G…	cic:CICLE_v10014972mg; hypothetical protein; K01466 allantoinase [EC:3.5.2.5] (A)	ko00230 Purine metabolism;	F	Dihydroorotase and related enzymes
F02_cb3135_c457/f1p0/1892	PREDICTED: glutamate receptor 3.1 [Elaeis guineensis]	3.162	Up	0.0063782	--	--	--	--	--	--	--	--	--	--	GO:0016020 membrane;	GO:0038023 signaling receptor activity; GO:0015276 ligand-gated ion channel activity; GO:0022824 transmitter-gated ion channel activity; GO:0005230 extracellular ligand-gated ion channel activity; GO:0022834 ligand-gated channel activity; GO:0015075 ion transmembrane transporter activity; GO:0022803 passive transmembrane transporter activity; GO:0022892 substrate-specific transporter activity; GO…	--	--	PET	Glutamate-gated kainate-type ion channel receptor subunit GluR5 and related subunits
F02_cb13599_c0/f1p0/880	"""PREDICTED: 10 kDa chaperonin, mitochondrial OS=Arabidopsis thaliana GN=CPN10 PE=1 SV=1"""	0.632	Down	0.0069172	1.137	--	0.187759	1.313	Up	0.025764	0.73	Down	0.02608	GO:0006457 protein folding; GO:0009987 cellular process;	GO:0044424 intracellular part; GO:0005623 cell; GO:0044464 cell part; GO:0005622 intracellular; GO:0005737 cytoplasm;	GO:0005524 ATP binding; GO:1901265 nucleoside phosphate binding; GO:0001882 nucleoside binding; GO:0043167 ion binding; GO:0000166 nucleotide binding; GO:0097159 organic cyclic compound binding; GO:1901363 heterocyclic compound binding; GO:0032549 ribonucleoside binding; GO:0097367 carbohydrate derivative binding; GO:0032553 ribonucleotide binding; GO:0005488 binding; GO:0032550 purine ribonucleo…	--	--	O	Mitochondrial chaperonin
F01_cb11473_c1/f2p0/1155	unnamed protein product [Coffea canephora]	4.219	Up	0.0003797	2.071	--	0.060475	0.86	--	0.34942	1.752	--	0.184183	GO:0019953 sexual reproduction; GO:0000003 reproduction; GO:0022414 reproductive process; GO:0051704 multi-organism process; GO:0044703 multi-organism reproductive process;	GO:0005576 extracellular region;	--	--	--	--	--
F01_cb12725_c7/f1p0/1544	PREDICTED: Ubiquitin carboxyl-terminal hydrolase 2 OS=Arabidopsis thaliana GN=UCH2 PE=1 SV=1	0.698	Down	0.0028973	--	--	--	--	--	--	--	--	--	GO:0043632 modification-dependent macromolecule catabolic process; GO:0044265 cellular macromolecule catabolic process; GO:0051603 proteolysis involved in cellular protein catabolic process; GO:0044257 cellular protein catabolic process; GO:0019941 modification-dependent protein catabolic process; GO:0044267 cellular protein metabolic process; GO:0006511 ubiquitin-dependent protein catabolic proc…	GO:0005623 cell; GO:0005622 intracellular; GO:0044464 cell part;	GO:0004843 thiol-dependent ubiquitin-specific protease activity; GO:0008233 peptidase activity; GO:0036459 thiol-dependent ubiquitinyl hydrolase activity; GO:0003824 catalytic activity; GO:0101005 ubiquitinyl hydrolase activity; GO:0070011 peptidase activity, acting on L-amino acid peptides; GO:0019783 ubiquitin-like protein-specific protease activity; GO:0008234 cysteine-type peptidase activity;…	--	--	O	Ubiquitin C-terminal hydrolase
F01_cb10586_c19/f1p0/724	PREDICTED: Subtilisin-like protease SBT3.8 OS=Arabidopsis thaliana GN=SBT3.8 PE=3 SV=1	1.98	Up	0.042295	1.769	Up	0.00023557	0.322	Down	6.4565e-05	0.361	--	0.060319	--	--	--	--	--	--	--
F01_cb13841_c6/f1p1/711	PREDICTED: Cytochrome b-c1 complex subunit 9 OS=Solanum tuberosum PE=1 SV=1	1.73	Up	0.00187563	1.884	Up	0.0059414	1.61	Up	0.011875	1.478	Up	0.0124207	GO:0016310 phosphorylation; GO:0009116 nucleoside metabolic process; GO:0042278 purine nucleoside metabolic process; GO:0006725 cellular aromatic compound metabolic process; GO:0009167 purine ribonucleoside monophosphate metabolic process; GO:0042773 ATP synthesis coupled electron transport; GO:0009259 ribonucleotide metabolic process; GO:0009117 nucleotide metabolic process; GO:0044699 single-or…	GO:0016020 membrane; GO:0098800 inner mitochondrial membrane protein complex; GO:0031090 organelle membrane; GO:0098796 membrane protein complex; GO:0005737 cytoplasm; GO:0031224 intrinsic component of membrane; GO:0032991 macromolecular complex; GO:0098798 mitochondrial protein complex; GO:0044424 intracellular part; GO:0005623 cell; GO:0044455 mitochondrial membrane part; GO:0044422 organelle p…	--	pxb:103929460; cytochrome b-c1 complex subunit 9-like; K00419 ubiquinol-cytochrome c reductase subunit 9 (A)	ko00190 Oxidative phosphorylation;	C	Ubiquinol cytochrome c oxidoreductase, subunit QCR9
F01_cb13594_c37/f1p0/867	PREDICTED: Thioredoxin H-type OS=Picea mariana GN=SB09 PE=2 SV=1	1.71	Up	0.029716	3.039	Up	0.0041805	1.69	Up	0.024702	0.951	--	0.73454	GO:0050794 regulation of cellular process; GO:0042592 homeostatic process; GO:0065008 regulation of biological quality; GO:0050789 regulation of biological process; GO:0045454 cell redox homeostasis; GO:0044763 single-organism cellular process; GO:0019725 cellular homeostasis; GO:0044699 single-organism process; GO:0009987 cellular process; GO:0065007 biological regulation;	--	--	--	--	O	Thioredoxin
F01_cb6092_c8/f1p0/2170	"""PREDICTED: Isocitrate dehydrogenase [NAD] regulatory subunit 1, mitochondrial OS=Arabidopsis thaliana GN=IDH1 PE=1 SV=2"""	0.272	Down	0.045616	0.549	Down	0.0162815	2.356	Up	0.0057414	1.167	--	0.52636	GO:0072350 tricarboxylic acid metabolic process; GO:0055114 oxidation-reduction process; GO:0044281 small molecule metabolic process; GO:0044763 single-organism cellular process; GO:0006099 tricarboxylic acid cycle; GO:0044699 single-organism process; GO:0044238 primary metabolic process; GO:0045333 cellular respiration; GO:0044237 cellular metabolic process; GO:0071704 organic substance metaboli…	--	GO:0004448 isocitrate dehydrogenase activity; GO:0016614 oxidoreductase activity, acting on CH-OH group of donors; GO:0016616 oxidoreductase activity, acting on the CH-OH group of donors, NAD or NADP as acceptor; GO:0004449 isocitrate dehydrogenase (NAD+) activity; GO:0003824 catalytic activity; GO:0016491 oxidoreductase activity;	atr:s00001p00200380; AMTR_s00001p00200380; hypothetical protein; K00030 isocitrate dehydrogenase (NAD+) [EC:1.1.1.41] (A)	ko00020 Citrate cycle (TCA cycle); ko01200 Carbon metabolism; ko01230 Biosynthesis of amino acids; ko01210 2-Oxocarboxylic acid metabolism;	--	--
F02_cb13625_c3/f1p0/967	hypothetical protein F775_08697 [Aegilops tauschii]	5.506	Up	0.0003825	7.611	Up	0.00069598	0.429	Down	0.0027433	0.311	Down	0.0071575	--	--	--	atr:s00009p00236890; AMTR_s00009p00236890; hypothetical protein; K13993 HSP20 family protein (A)	ko04141 Protein processing in endoplasmic reticulum;	O	Molecular chaperone (small heat-shock protein Hsp26/Hsp42)
F02_cb9735_c60810/f2p0/2562	PREDICTED: dynamin-related protein 4C-like [Nicotiana sylvestris]	0.7	Down	0.00148278	1.063	--	0.8004	0.503	Down	0.042784	0.332	Down	0.00057826	--	--	GO:1901265 nucleoside phosphate binding; GO:0001882 nucleoside binding; GO:0043167 ion binding; GO:0016817 hydrolase activity, acting on acid anhydrides; GO:0016787 hydrolase activity; GO:0000166 nucleotide binding; GO:0017111 nucleoside-triphosphatase activity; GO:0097159 organic cyclic compound binding; GO:1901363 heterocyclic compound binding; GO:0032549 ribonucleoside binding; GO:0097367 carb…	--	--	UR	Vacuolar sorting protein VPS1, dynamin, and related proteins
F01_cb8365_c2/f1p0/1799	PREDICTED: actin-related protein 2 [Elaeis guineensis]	0.605	Down	0.022256	1.025	--	0.87352	1.31	--	0.164661	0.774	--	0.052259	--	--	--	--	--	Z	Actin-related protein Arp2/3 complex, subunit Arp2
F01_cb4063_c4/f1p0/1926	"""PREDICTED: Folate-biopterin transporter 1, chloroplastic OS=Arabidopsis thaliana GN=At2g32040 PE=1 SV=2"""	1.416	Up	0.021064	--	--	--	--	--	--	--	--	--	GO:0006810 transport; GO:0051179 localization; GO:0051234 establishment of localization;	GO:0031224 intrinsic component of membrane; GO:0016020 membrane; GO:0016021 integral component of membrane; GO:0044425 membrane part;	--	--	--	--	--
F02_cb8264_c13/f1p0/1864	"""PREDICTED: Glyceraldehyde-3-phosphate dehydrogenase GAPB, chloroplastic OS=Arabidopsis thaliana GN=GAPB PE=1 SV=2"""	0.296	Down	0.0027042	0.601	--	0.65564	0.628	--	0.25588	0.31	--	0.074281	GO:0044699 single-organism process; GO:0008152 metabolic process; GO:0055114 oxidation-reduction process; GO:0044710 single-organism metabolic process;	--	GO:0016620 oxidoreductase activity, acting on the aldehyde or oxo group of donors, NAD or NADP as acceptor; GO:0003824 catalytic activity; GO:0016491 oxidoreductase activity; GO:0016903 oxidoreductase activity, acting on the aldehyde or oxo group of donors;	vvi:100259814; glyceraldehyde-3-phosphate dehydrogenase B, chloroplastic; K05298 glyceraldehyde-3-phosphate dehydrogenase (NADP+) (phosphorylating) [EC:1.2.1.13] (A)	ko01200 Carbon metabolism; ko00710 Carbon fixation in photosynthetic organisms;	G	Glyceraldehyde 3-phosphate dehydrogenase
F02_cb946_c7/f1p1/2452	PREDICTED: Aldehyde dehydrogenase 22A1 OS=Arabidopsis thaliana GN=ALDH22A1 PE=2 SV=2	0.663	Down	0.044996	--	--	--	--	--	--	--	--	--	GO:0044699 single-organism process; GO:0008152 metabolic process; GO:0055114 oxidation-reduction process; GO:0044710 single-organism metabolic process;	--	GO:0016620 oxidoreductase activity, acting on the aldehyde or oxo group of donors, NAD or NADP as acceptor; GO:0003824 catalytic activity; GO:0016491 oxidoreductase activity; GO:0016903 oxidoreductase activity, acting on the aldehyde or oxo group of donors;	--	--	C	Betaine aldehyde dehydrogenase
F02_cb6090_c29/f1p0/1519	PREDICTED: Homocysteine S-methyltransferase 2 OS=Arabidopsis thaliana GN=HMT-2 PE=1 SV=1	2.595	Up	0.022784	15.534	Up	0.0020151	6.997	Up	0.00119695	1.169	--	0.58698	--	--	--	rcu:RCOM_0646290; 5-methyltetrahydrofolate:homocysteine methyltransferase, putative (EC:2.1.1.10); K00547 homocysteine S-methyltransferase [EC:2.1.1.10] (A)	ko00270 Cysteine and methionine metabolism;	E	Homocysteine S-methyltransferase
F02_cb13197_c0/f4p0/892	PREDICTED: 21 kDa protein OS=Daucus carota PE=2 SV=1	3.127	Up	0.016537	1.42	--	0.41698	0.303	Down	0.0126562	0.667	--	0.3701	--	--	GO:0004857 enzyme inhibitor activity; GO:0098772 molecular function regulator; GO:0030234 enzyme regulator activity;	--	--	--	--
F02_cb9735_c684/f4p0/2383	PREDICTED: putative receptor-like protein kinase At4g00960 [Elaeis guineensis]	1.618	Up	0.037761	0.95	--	0.87116	0.336	Down	0.00152088	0.572	Down	0.044739	GO:0016310 phosphorylation; GO:0044267 cellular protein metabolic process; GO:0044238 primary metabolic process; GO:0044237 cellular metabolic process; GO:0006796 phosphate-containing compound metabolic process; GO:0071704 organic substance metabolic process; GO:0008152 metabolic process; GO:0006468 protein phosphorylation; GO:0006793 phosphorus metabolic process; GO:0044260 cellular macromolecul…	--	GO:0005524 ATP binding; GO:1901265 nucleoside phosphate binding; GO:0016773 phosphotransferase activity, alcohol group as acceptor; GO:0001882 nucleoside binding; GO:0043167 ion binding; GO:0004672 protein kinase activity; GO:0000166 nucleotide binding; GO:0097159 organic cyclic compound binding; GO:1901363 heterocyclic compound binding; GO:0032549 ribonucleoside binding; GO:0097367 carbohydrate …	--	--	T	Serine/threonine protein kinase
F02_cb5088_c5/f1p1/2539	PREDICTED: probable methyltransferase PMT11 [Phoenix dactylifera]	2.239	Up	0.00111606	--	--	--	--	--	--	--	--	--	--	--	GO:0016741 transferase activity, transferring one-carbon groups; GO:0008168 methyltransferase activity; GO:0003824 catalytic activity; GO:0016740 transferase activity;	--	--	--	--
F01_cb8667_c10/f2p0/1381	"""PREDICTED: Multiple organellar RNA editing factor 8, chloroplastic/mitochondrial OS=Arabidopsis thaliana GN=MORF8 PE=1 SV=1"""	0.355	Down	0.0075555	0.703	Down	0.026919	2.294	Up	0.00149974	1.16	--	0.439	--	--	--	--	--	--	--
F01_cb13840_c5/f1p1/1571	unknown [Picea sitchensis]	2.177	Up	0.0046967	2.263	Up	0.0125021	0.744	--	0.21288	0.715	Down	0.020535	--	--	GO:0005515 protein binding; GO:0005488 binding;	--	--	--	--
F02_cb131_c12/f1p0/4711	PREDICTED: translational activator GCN1 [Vitis vinifera]	1.633	Up	0.022624	--	--	--	--	--	--	--	--	--	--	--	GO:0005515 protein binding; GO:0005488 binding;	--	--	J	Protein containing adaptin N-terminal region
F02_cb2297_c19/f1p2/2474	hypothetical protein AMTR_s00038p00207680 [Amborella trichopoda]	2.054	Up	0.024776	--	--	--	--	--	--	--	--	--	--	--	GO:0016741 transferase activity, transferring one-carbon groups; GO:0008168 methyltransferase activity; GO:0003824 catalytic activity; GO:0016740 transferase activity;	--	--	--	--
F01_cb10182_c18/f1p1/1069	PREDICTED: 40S ribosomal protein S7 OS=Secale cereale GN=RPS7 PE=2 SV=1	0.615	Down	0.025939	1.024	--	0.77494	2.99	Up	0.0008586	1.796	Up	0.0065638	GO:0006518 peptide metabolic process; GO:0043043 peptide biosynthetic process; GO:0044267 cellular protein metabolic process; GO:0006807 nitrogen compound metabolic process; GO:0009058 biosynthetic process; GO:0043603 cellular amide metabolic process; GO:0044238 primary metabolic process; GO:1901566 organonitrogen compound biosynthetic process; GO:1901576 organic substance biosynthetic process; G…	GO:0005840 ribosome; GO:0043226 organelle; GO:0043229 intracellular organelle; GO:0043232 intracellular non-membrane-bounded organelle; GO:0044464 cell part; GO:0005622 intracellular; GO:0005737 cytoplasm; GO:0032991 macromolecular complex; GO:0044424 intracellular part; GO:1990904 ribonucleoprotein complex; GO:0005623 cell; GO:0030529 intracellular ribonucleoprotein complex; GO:0044444 cytoplasm…	GO:0003735 structural constituent of ribosome; GO:0005198 structural molecule activity;	mus:104000959; 40S ribosomal protein S7-like; K02993 small subunit ribosomal protein S7e (A)	ko03010 Ribosome;	J	40S ribosomal protein S7
F01_cb11774_c2/f2p0/907	PREDICTED: Mitochondrial import receptor subunit TOM20 OS=Solanum tuberosum GN=TOM20 PE=1 SV=1	1.497	Up	0.0177641	1.492	Up	0.028037	0.96	--	0.77324	0.963	--	0.62256	GO:0016043 cellular component organization; GO:0046907 intracellular transport; GO:0072594 establishment of protein localization to organelle; GO:0007006 mitochondrial membrane organization; GO:0017038 protein import; GO:0006839 mitochondrial transport; GO:0044699 single-organism process; GO:0015031 protein transport; GO:0051234 establishment of localization; GO:0006605 protein targeting; GO:0045…	GO:0016020 membrane; GO:0019867 outer membrane; GO:0031090 organelle membrane; GO:0098796 membrane protein complex; GO:0005737 cytoplasm; GO:0032991 macromolecular complex; GO:0098798 mitochondrial protein complex; GO:0044424 intracellular part; GO:0044455 mitochondrial membrane part; GO:0005623 cell; GO:0044422 organelle part; GO:0005740 mitochondrial envelope; GO:0044425 membrane part; GO:00444…	GO:0005515 protein binding; GO:0005488 binding;	--	--	--	--
F02_cb7672_c17/f1p0/1857	"""putative flavoprotein-containing polyamine oxidase, partial [Pinus sylvestris]"""	2.79	Up	0.0034408	--	--	--	--	--	--	--	--	--	GO:0044699 single-organism process; GO:0008152 metabolic process; GO:0055114 oxidation-reduction process; GO:0044710 single-organism metabolic process;	--	GO:0003824 catalytic activity; GO:0016491 oxidoreductase activity;	atr:s00058p00159400; AMTR_s00058p00159400; hypothetical protein; K13366 polyamine oxidase [EC:1.5.3.14 1.5.3.16 1.5.3.-] (A)	ko00330 Arginine and proline metabolism; ko00410 beta-Alanine metabolism;	Q	Amine oxidase
F02_cb15878_c0/f2p0/710	unknown [Picea sitchensis]	9.287	Up	0.00108275	7.891	--	0.07546	1.007	--	0.7338	1.185	--	0.4009	--	--	GO:0005515 protein binding; GO:0005488 binding;	--	--	--	--
F02_cb10538_c1/f1p0/1273	PREDICTED: PRA1 family protein F2 OS=Arabidopsis thaliana GN=PRA1F2 PE=1 SV=1	6.917	Up	0.00045667	1.458	--	0.082702	0.324	Down	0.0067039	1.539	Up	0.0136365	--	--	--	--	--	U	Prenylated rab acceptor 1
F02_cb8248_c4/f1p0/1910	"""PREDICTED: Acetylglutamate kinase, chloroplastic OS=Arabidopsis thaliana GN=NAGK PE=1 SV=1"""	3.731	Up	0.00039981	--	--	--	--	--	--	--	--	--	GO:0009064 glutamine family amino acid metabolic process; GO:0008652 cellular amino acid biosynthetic process; GO:0006526 arginine biosynthetic process; GO:0016053 organic acid biosynthetic process; GO:0044711 single-organism biosynthetic process; GO:0044281 small molecule metabolic process; GO:0044763 single-organism cellular process; GO:0006525 arginine metabolic process; GO:0044699 single-orga…	GO:0044424 intracellular part; GO:0005623 cell; GO:0044464 cell part; GO:0005622 intracellular; GO:0005737 cytoplasm;	GO:0016774 phosphotransferase activity, carboxyl group as acceptor; GO:0003991 acetylglutamate kinase activity; GO:0016301 kinase activity; GO:0003824 catalytic activity; GO:0016740 transferase activity; GO:0016772 transferase activity, transferring phosphorus-containing groups;	ppp:PHYPADRAFT_217744; hypothetical protein; K00930 acetylglutamate kinase [EC:2.7.2.8] (A)	ko00330 Arginine and proline metabolism; ko01230 Biosynthesis of amino acids; ko01210 2-Oxocarboxylic acid metabolism;	E	Acetylglutamate kinase/acetylglutamate synthase
F02_cb11797_c6/f1p0/1689	unknown [Picea sitchensis]	0.344	Down	0.0106972	--	--	--	--	--	--	--	--	--	--	GO:0044464 cell part; GO:0005622 intracellular; GO:0032991 macromolecular complex; GO:0030014 CCR4-NOT complex; GO:0044424 intracellular part; GO:0043234 protein complex; GO:0005623 cell;	--	--	--	S	Uncharacterized conserved protein
F01_cb13407_c3/f1p1/1709	"""PREDICTED: Red chlorophyll catabolite reductase, chloroplastic OS=Arabidopsis thaliana GN=RCCR PE=1 SV=2"""	1.671	Up	0.041704	1.182	--	0.22678	0.616	Down	0.0120203	0.871	--	0.58654	--	--	--	pop:POPTR_0007s11060g; POPTRDRAFT_764544; hypothetical protein; K13545 red chlorophyll catabolite reductase [EC:1.3.1.80] (A)	ko00860 Porphyrin and chlorophyll metabolism;	--	--
F02_cb2380_c0/f3p0/5513	hypothetical protein AMTR_s00071p00159780 [Amborella trichopoda]	1.813	Up	0.020716	0.753	--	0.33848	0.272	Down	0.0112242	0.654	Down	0.043219	GO:0006486 protein glycosylation; GO:0043413 macromolecule glycosylation; GO:0009101 glycoprotein biosynthetic process; GO:0044763 single-organism cellular process; GO:0044267 cellular protein metabolic process; GO:0009100 glycoprotein metabolic process; GO:0044699 single-organism process; GO:0009058 biosynthetic process; GO:0044238 primary metabolic process; GO:0044237 cellular metabolic process…	--	GO:0016758 transferase activity, transferring hexosyl groups; GO:0003824 catalytic activity; GO:0003980 UDP-glucose:glycoprotein glucosyltransferase activity; GO:0035251 UDP-glucosyltransferase activity; GO:0008194 UDP-glycosyltransferase activity; GO:0046527 glucosyltransferase activity; GO:0016757 transferase activity, transferring glycosyl groups; GO:0016740 transferase activity;	atr:s00071p00159780; AMTR_s00071p00159780; hypothetical protein; K11718 UDP-glucose:glycoprotein glucosyltransferase [EC:2.4.1.-] (A)	ko04141 Protein processing in endoplasmic reticulum;	G	UDP-glucose:glycoprotein glucosyltransferase
F01_cb5000_c99004/f9p0/2892	PREDICTED: protein transport protein SEC23-like [Nelumbo nucifera]	0.529	Down	0.030419	0.798	--	0.21908	1.506	--	0.056764	0.999	--	0.93964	GO:0045184 establishment of protein localization; GO:0006810 transport; GO:0046907 intracellular transport; GO:0070727 cellular macromolecule localization; GO:0051649 establishment of localization in cell; GO:0016192 vesicle-mediated transport; GO:0006886 intracellular protein transport; GO:0048193 Golgi vesicle transport; GO:0071702 organic substance transport; GO:0008104 protein localization; G…	GO:0016020 membrane; GO:0030658 transport vesicle membrane; GO:0031410 cytoplasmic vesicle; GO:0031090 organelle membrane; GO:0098796 membrane protein complex; GO:0005737 cytoplasm; GO:0031982 vesicle; GO:0044433 cytoplasmic vesicle part; GO:0032991 macromolecular complex; GO:0044424 intracellular part; GO:0030120 vesicle coat; GO:0005623 cell; GO:0044422 organelle part; GO:0030662 coated vesicle…	GO:0043169 cation binding; GO:0046872 metal ion binding; GO:0008270 zinc ion binding; GO:0046914 transition metal ion binding; GO:0005488 binding; GO:0043167 ion binding;	ppp:PHYPADRAFT_212135; hypothetical protein; K14006 protein transport protein SEC23 (A)	ko04141 Protein processing in endoplasmic reticulum;	U	Vesicle coat complex COPII, subunit SEC23
F02_cb14399_c7/f2p0/1567	"""PREDICTED: L-3-cyanoalanine synthase 1, mitochondrial OS=Malus domestica GN=CAS1 PE=1 SV=1"""	2.718	Up	0.0011376	3.086	Up	0.0112615	1.546	--	0.146484	1.362	--	0.144457	GO:0000097 sulfur amino acid biosynthetic process; GO:0016053 organic acid biosynthetic process; GO:0044699 single-organism process; GO:0009058 biosynthetic process; GO:1901566 organonitrogen compound biosynthetic process; GO:0044237 cellular metabolic process; GO:0044272 sulfur compound biosynthetic process; GO:0000096 sulfur amino acid metabolic process; GO:0071704 organic substance metabolic p…	--	GO:0016829 lyase activity; GO:0004124 cysteine synthase activity; GO:0003824 catalytic activity; GO:0016835 carbon-oxygen lyase activity;	atr:s00009p00219590; AMTR_s00009p00219590; hypothetical protein; K13034 L-3-cyanoalanine synthase/ cysteine synthase [EC:2.5.1.47 4.4.1.9] (A)	ko00270 Cysteine and methionine metabolism; ko01200 Carbon metabolism; ko01230 Biosynthesis of amino acids; ko00920 Sulfur metabolism; ko00460 Cyanoamino acid metabolism;	E	Cystathionine beta-synthase and related enzymes
F02_cb12372_c2/f1p0/1168	PREDICTED: Clavaminate synthase-like protein At3g21360 OS=Arabidopsis thaliana GN=At3g21360 PE=1 SV=1	0.451	Down	0.0027593	0.743	Down	0.021222	2.477	Up	0.00091868	1.503	Up	0.0157817	GO:0044699 single-organism process; GO:0008152 metabolic process; GO:0055114 oxidation-reduction process; GO:0044710 single-organism metabolic process;	--	GO:0003824 catalytic activity; GO:0016491 oxidoreductase activity;	--	--	--	--
F01_cb14204_c2/f2p0/781	PREDICTED: Cysteine proteinase inhibitor 12 OS=Oryza sativa subsp. japonica GN=Os01g0270100 PE=2 SV=1	1.946	Up	0.02398	--	--	--	--	--	--	--	--	--	--	--	--	--	--	--	--
F02_cb1278_c23/f1p0/3454	"""PREDICTED: Lipoxygenase 6, chloroplastic OS=Arabidopsis thaliana GN=LOX6 PE=2 SV=1"""	1.542	Up	0.042922	--	--	--	--	--	--	--	--	--	GO:0044699 single-organism process; GO:0008152 metabolic process; GO:0055114 oxidation-reduction process; GO:0044710 single-organism metabolic process;	--	GO:0016702 oxidoreductase activity, acting on single donors with incorporation of molecular oxygen, incorporation of two atoms of oxygen; GO:0016701 oxidoreductase activity, acting on single donors with incorporation of molecular oxygen; GO:0003824 catalytic activity; GO:0005488 binding; GO:0051213 dioxygenase activity; GO:0043167 ion binding; GO:0043169 cation binding; GO:0046872 metal ion bindi…	pop:POPTR_0001s16780g; hypothetical protein; K00454 lipoxygenase [EC:1.13.11.12] (A)	ko00592 alpha-Linolenic acid metabolism; ko00591 Linoleic acid metabolism;	--	--
F01_cb10642_c0/f6p0/690	"""PREDICTED: Glycine-rich RNA-binding protein 2, mitochondrial OS=Arabidopsis thaliana GN=RBG2 PE=1 SV=1"""	2.248	Up	0.0057595	--	--	--	--	--	--	--	--	--	--	--	GO:0097159 organic cyclic compound binding; GO:1901363 heterocyclic compound binding; GO:1901265 nucleoside phosphate binding; GO:0005488 binding; GO:0003676 nucleic acid binding; GO:0000166 nucleotide binding; GO:0036094 small molecule binding;	--	--	R	FOG: RRM domain
F01_cb14759_c1/f3p1/988	PREDICTED: Probable prefoldin subunit 2 OS=Arabidopsis thaliana GN=At3g22480 PE=2 SV=1	0.143	Down	0.003775	0.121	Down	0.00014277	0.531	Down	0.020936	0.63	--	0.27414	GO:0006457 protein folding; GO:0009987 cellular process;	GO:0016272 prefoldin complex; GO:0032991 macromolecular complex; GO:0043234 protein complex;	GO:0005515 protein binding; GO:0051082 unfolded protein binding; GO:0005488 binding;	--	--	O	Molecular chaperone Prefoldin, subunit 2
F02_cb5370_c20/f1p0/2154	PREDICTED: Heterogeneous nuclear ribonucleoprotein 1 OS=Arabidopsis thaliana GN=RNP1 PE=1 SV=1	1.341	Up	0.0044587	1.149	--	0.0160355	0.602	Down	6.3584e-05	0.703	Down	0.0029221	--	--	GO:0097159 organic cyclic compound binding; GO:1901363 heterocyclic compound binding; GO:0003723 RNA binding; GO:1901265 nucleoside phosphate binding; GO:0005488 binding; GO:0003676 nucleic acid binding; GO:0000166 nucleotide binding; GO:0036094 small molecule binding;	vvi:100247389; RNA-binding protein Musashi homolog 2; K14411 RNA-binding protein Musashi (A)	ko03015 mRNA surveillance pathway;	A	RNA-binding protein musashi/mRNA cleavage and polyadenylation factor I complex, subunit HRP1
F01_cb5320_c2/f2p0/2378	"""PREDICTED: Glutamyl-tRNA(Gln) amidotransferase subunit A, chloroplastic/mitochondrial OS=Zea mays GN=GATA PE=2 SV=1"""	0.177	Down	0.00079722	0.333	Down	0.038478	0.466	Down	0.0039615	0.247	Down	0.0141394	--	--	--	--	--	J	Amidases
F01_cb5026_c22/f1p0/2301	PREDICTED: uncharacterized protein LOC105049306 [Elaeis guineensis]	0.194	Down	0.00034375	--	--	--	--	--	--	--	--	--	--	--	--	--	--	--	--
F01_cb2246_c19/f1p1/1549	PREDICTED: Isoflavone reductase-like protein OS=Olea europaea PE=1 SV=1	0.147	Down	0.00115832	0.17	Down	0.00067815	0.676	--	0.098121	0.581	--	0.087438	--	--	--	--	--	--	--
F02_cb12128_c7/f1p1/1336	PREDICTED: 60S ribosomal protein L17 OS=Zea mays GN=RPL17 PE=2 SV=1	0.273	Down	0.026225	1.012	--	0.98166	4.783	Up	0.00097792	1.293	--	0.3619	GO:0006518 peptide metabolic process; GO:0043043 peptide biosynthetic process; GO:0044267 cellular protein metabolic process; GO:0006807 nitrogen compound metabolic process; GO:0009058 biosynthetic process; GO:0043603 cellular amide metabolic process; GO:0044238 primary metabolic process; GO:1901566 organonitrogen compound biosynthetic process; GO:1901576 organic substance biosynthetic process; G…	GO:0005840 ribosome; GO:0043229 intracellular organelle; GO:0043232 intracellular non-membrane-bounded organelle; GO:0044446 intracellular organelle part; GO:0005737 cytoplasm; GO:0032991 macromolecular complex; GO:0044424 intracellular part; GO:0005623 cell; GO:0044422 organelle part; GO:0043228 non-membrane-bounded organelle; GO:0043226 organelle; GO:0015934 large ribosomal subunit; GO:0044391 …	GO:0003735 structural constituent of ribosome; GO:0005198 structural molecule activity;	atr:s00013p00224030; AMTR_s00013p00224030; hypothetical protein; K02880 large subunit ribosomal protein L17e (A)	ko03010 Ribosome;	J	60S ribosomal protein L22
F01_cb4319_c2/f1p1/2573	PREDICTED: Beta-glucuronosyltransferase GlcAT14B OS=Arabidopsis thaliana GN=GLCAT14B PE=2 SV=1	1.377	Up	0.037298	1.043	--	0.8305	0.487	Down	0.0045848	0.643	Down	0.037636	--	GO:0016020 membrane;	GO:0008375 acetylglucosaminyltransferase activity; GO:0008194 UDP-glycosyltransferase activity; GO:0016757 transferase activity, transferring glycosyl groups; GO:0016758 transferase activity, transferring hexosyl groups; GO:0003824 catalytic activity; GO:0016740 transferase activity;	--	--	G	Branching enzyme
F01_cb12566_c0/f6p1/882	PREDICTED: Sm-like protein LSM36B OS=Arabidopsis thaliana GN=LSM6B PE=1 SV=1	1.687	Up	0.029335	2.31	Up	0.0091965	0.795	--	0.142637	0.58	--	0.054299	--	--	--	sot:102588530; U6 snRNA-associated Sm-like protein LSm6-like; K12625 U6 snRNA-associated Sm-like protein LSm6 (A)	ko03040 Spliceosome; ko03018 RNA degradation;	A	Small nuclear ribonucleoprotein F
F01_cb10763_c19/f1p0/1398	"""PREDICTED: Quinone oxidoreductase-like protein At1g23740, chloroplastic OS=Arabidopsis thaliana GN=At1g23740 PE=2 SV=2"""	0.568	Down	0.0130953	0.694	--	0.054604	1.436	--	0.104025	1.176	--	0.156141	GO:0044699 single-organism process; GO:0008152 metabolic process; GO:0055114 oxidation-reduction process; GO:0044710 single-organism metabolic process;	--	GO:0003824 catalytic activity; GO:0016491 oxidoreductase activity;	--	--	CR	Zinc-binding oxidoreductase
F01_cb5000_c73178/f1p0/1867	PREDICTED: Catalase-3 OS=Arabidopsis thaliana GN=CAT3 PE=1 SV=3	0.222	Down	0.0080787	0.546	Down	0.00180037	7.007	Up	0.00028271	2.846	--	0.05082	GO:0008152 metabolic process; GO:0006950 response to stress; GO:0055114 oxidation-reduction process; GO:0044710 single-organism metabolic process; GO:0006979 response to oxidative stress; GO:0044699 single-organism process; GO:0050896 response to stimulus;	--	GO:0097159 organic cyclic compound binding; GO:1901363 heterocyclic compound binding; GO:0020037 heme binding; GO:0003824 catalytic activity; GO:0005488 binding; GO:0016209 antioxidant activity; GO:0004096 catalase activity; GO:0004601 peroxidase activity; GO:0046906 tetrapyrrole binding; GO:0016491 oxidoreductase activity; GO:0016684 oxidoreductase activity, acting on peroxide as acceptor;	ppp:PHYPADRAFT_64727; hypothetical protein; K03781 catalase [EC:1.11.1.6] (A)	ko00380 Tryptophan metabolism; ko04146 Peroxisome; ko00630 Glyoxylate and dicarboxylate metabolism;	P	Catalase
F01_cb10349_c93/f1p0/1122	PREDICTED: ESCRT-related protein CHMP1A OS=Arabidopsis thaliana GN=CHMP1A PE=1 SV=1	0.762	Down	0.0040593	1.083	--	0.72188	1.172	--	0.42346	0.825	Down	0.037997	GO:0006810 transport; GO:0051179 localization; GO:0007034 vacuolar transport; GO:0051234 establishment of localization;	--	--	atr:s00036p00206680; AMTR_s00036p00206680; hypothetical protein; K12197 charged multivesicular body protein 1 (A)	ko04144 Endocytosis;	U	Vacuolar assembly/sorting protein DID2
F02_cb3837_c37/f1p0/1978	predicted protein [Physcomitrella patens]	0.548	Down	0.0076009	--	--	--	--	--	--	--	--	--	--	GO:1902494 catalytic complex; GO:0044464 cell part; GO:0005622 intracellular; GO:0008287 protein serine/threonine phosphatase complex; GO:0032991 macromolecular complex; GO:0044424 intracellular part; GO:0005623 cell; GO:1903293 phosphatase complex; GO:0000159 protein phosphatase type 2A complex;	GO:0098772 molecular function regulator; GO:0030234 enzyme regulator activity; GO:0019888 protein phosphatase regulator activity; GO:0019208 phosphatase regulator activity;	ppp:PHYPADRAFT_154437; hypothetical protein; K04354 serine/threonine-protein phosphatase 2A regulatory subunit B (A)	ko03015 mRNA surveillance pathway;	T	Serine/threonine protein phosphatase 2A, regulatory subunit
F01_cb13954_c5/f1p0/1186	PREDICTED: VAMP-like protein YKT61 OS=Arabidopsis thaliana GN=YKT61 PE=2 SV=1	1.601	Up	0.043085	1.318	--	0.35056	0.538	--	0.057464	0.654	Down	0.0044179	GO:0006810 transport; GO:0051179 localization; GO:0016192 vesicle-mediated transport; GO:0051234 establishment of localization;	GO:0031224 intrinsic component of membrane; GO:0016020 membrane; GO:0016021 integral component of membrane; GO:0044425 membrane part;	--	tcc:TCM_037091; SNARE-like superfamily protein; K08516 synaptobrevin homolog YKT6 (A)	ko04130 SNARE interactions in vesicular transport;	U	SNARE protein YKT6, synaptobrevin/VAMP syperfamily
F02_cb6646_c10/f1p0/2042	hypothetical protein AMTR_s00066p00141740 [Amborella trichopoda]	0.735	Down	0.021741	1.067	--	0.67506	1.574	Up	0.0165406	1.085	--	0.58574	GO:0008652 cellular amino acid biosynthetic process; GO:0016053 organic acid biosynthetic process; GO:0044711 single-organism biosynthetic process; GO:0009082 branched-chain amino acid biosynthetic process; GO:0044281 small molecule metabolic process; GO:0044763 single-organism cellular process; GO:0044699 single-organism process; GO:0006807 nitrogen compound metabolic process; GO:0009058 biosynt…	--	GO:0016597 amino acid binding; GO:0031406 carboxylic acid binding; GO:0003824 catalytic activity; GO:0005488 binding; GO:0003984 acetolactate synthase activity; GO:0016744 transferase activity, transferring aldehyde or ketonic groups; GO:0043167 ion binding; GO:0043177 organic acid binding; GO:0043168 anion binding; GO:0016740 transferase activity; GO:0036094 small molecule binding;	mus:103989338; acetolactate synthase small subunit 2, chloroplastic-like; K01653 acetolactate synthase I/III small subunit [EC:2.2.1.6] (A)	ko00660 C5-Branched dibasic acid metabolism; ko01230 Biosynthesis of amino acids; ko00770 Pantothenate and CoA biosynthesis; ko00290 Valine, leucine and isoleucine biosynthesis; ko00650 Butanoate metabolism; ko01210 2-Oxocarboxylic acid metabolism;	E	Acetolactate synthase, small subunit
F01_cb3937_c0/f3p1/2527	PREDICTED: ABC transporter B family member 28 [Nelumbo nucifera]	1.433	Up	0.0071563	1.103	--	0.161657	0.852	--	0.101802	1.107	--	0.133161	GO:0006810 transport; GO:0055085 transmembrane transport; GO:0051179 localization; GO:0051234 establishment of localization;	GO:0031224 intrinsic component of membrane; GO:0016020 membrane; GO:0016021 integral component of membrane; GO:0044425 membrane part;	GO:1901265 nucleoside phosphate binding; GO:0015399 primary active transmembrane transporter activity; GO:0016817 hydrolase activity, acting on acid anhydrides; GO:0016787 hydrolase activity; GO:0016887 ATPase activity; GO:0097159 organic cyclic compound binding; GO:1901363 heterocyclic compound binding; GO:0016462 pyrophosphatase activity; GO:0003824 catalytic activity; GO:0032553 ribonucleotide…	--	--	Q	Multidrug/pheromone exporter, ABC superfamily
F01_cb14517_c0/f1p0/1262	"""PREDICTED: Peroxiredoxin-2E-2, chloroplastic OS=Oryza sativa subsp. japonica GN=PRXIIE-2 PE=1 SV=1"""	2.317	Up	0.00091829	2.108	Up	0.0395	1.312	--	0.07528	1.442	--	0.29192	GO:0050794 regulation of cellular process; GO:0042592 homeostatic process; GO:0065008 regulation of biological quality; GO:0050789 regulation of biological process; GO:0045454 cell redox homeostasis; GO:0044763 single-organism cellular process; GO:0019725 cellular homeostasis; GO:0044699 single-organism process; GO:0009987 cellular process; GO:0065007 biological regulation;	--	GO:0003824 catalytic activity; GO:0016491 oxidoreductase activity;	--	--	O	Alkyl hydroperoxide reductase/peroxiredoxin
F02_cb5329_c7/f5p1/2204	"""PREDICTED: Glutathione reductase, cytosolic OS=Oryza sativa subsp. japonica GN=GRC2 PE=2 SV=2"""	0.427	Down	0.0186751	0.968	--	0.80404	3.433	Up	3.6894e-05	1.515	--	0.119241	GO:0006790 sulfur compound metabolic process; GO:0050794 regulation of cellular process; GO:0065008 regulation of biological quality; GO:0006518 peptide metabolic process; GO:0055114 oxidation-reduction process; GO:0045454 cell redox homeostasis; GO:0044763 single-organism cellular process; GO:0006807 nitrogen compound metabolic process; GO:0019725 cellular homeostasis; GO:0044699 single-organism…	--	GO:0016651 oxidoreductase activity, acting on NAD(P)H; GO:1901265 nucleoside phosphate binding; GO:0050660 flavin adenine dinucleotide binding; GO:0043167 ion binding; GO:0016209 antioxidant activity; GO:0000166 nucleotide binding; GO:0016668 oxidoreductase activity, acting on a sulfur group of donors, NAD(P) as acceptor; GO:0048037 cofactor binding; GO:0004362 glutathione-disulfide reductase act…	mus:103988968; glutathione reductase, cytosolic; K00383 glutathione reductase (NADPH) [EC:1.8.1.7] (A)	ko00480 Glutathione metabolism;	Q	Pyridine nucleotide-disulphide oxidoreductase
F01_cb4953_c12/f1p0/2315	PREDICTED: Putative kinase-like protein TMKL1 OS=Arabidopsis thaliana GN=TMKL1 PE=1 SV=1	1.463	Up	0.0135163	--	--	--	--	--	--	--	--	--	GO:0016310 phosphorylation; GO:0044267 cellular protein metabolic process; GO:0044238 primary metabolic process; GO:0044237 cellular metabolic process; GO:0006796 phosphate-containing compound metabolic process; GO:0071704 organic substance metabolic process; GO:0008152 metabolic process; GO:0006468 protein phosphorylation; GO:0006793 phosphorus metabolic process; GO:0044260 cellular macromolecul…	--	GO:0005524 ATP binding; GO:1901265 nucleoside phosphate binding; GO:0016773 phosphotransferase activity, alcohol group as acceptor; GO:0001882 nucleoside binding; GO:0043167 ion binding; GO:0005515 protein binding; GO:0004672 protein kinase activity; GO:0000166 nucleotide binding; GO:0097159 organic cyclic compound binding; GO:1901363 heterocyclic compound binding; GO:0032549 ribonucleoside bindi…	--	--	R	FOG: Leucine rich repeat
F01_cb15376_c3/f1p0/1348	unknown [Picea sitchensis]	1.208	Up	0.0449	1.115	--	0.38864	0.961	--	0.64424	1.041	--	0.54354	GO:0006810 transport; GO:0048193 Golgi vesicle transport; GO:0051179 localization; GO:0051234 establishment of localization; GO:0016192 vesicle-mediated transport;	GO:0044464 cell part; GO:0005622 intracellular; GO:0030008 TRAPP complex; GO:0032991 macromolecular complex; GO:0044424 intracellular part; GO:0043234 protein complex; GO:0005623 cell; GO:0099023 tethering complex;	--	--	--	U	Transport protein particle (TRAPP) complex subunit
F02_cb5909_c5/f1p0/1849	auxin induced-like protein [Picea sitchensis]	2.373	Up	0.029918	--	--	--	--	--	--	--	--	--	--	--	--	--	--	T	Predicted membrane protein, contains DoH and Cytochrome b-561/ferric reductase transmembrane domains
F02_cb1103_c34/f1p0/1260	unknown [Picea sitchensis]	0.244	Down	0.038922	--	--	--	--	--	--	--	--	--	--	--	GO:0016787 hydrolase activity; GO:0016811 hydrolase activity, acting on carbon-nitrogen (but not peptide) bonds, in linear amides; GO:0003824 catalytic activity; GO:0016810 hydrolase activity, acting on carbon-nitrogen (but not peptide) bonds;	aly:ARALYDRAFT_490862; hypothetical protein; K01455 formamidase [EC:3.5.1.49] (A)	ko00910 Nitrogen metabolism; ko01200 Carbon metabolism; ko00460 Cyanoamino acid metabolism; ko00630 Glyoxylate and dicarboxylate metabolism;	--	--
F02_cb13650_c0/f5p0/1407	"""PREDICTED: 20 kDa chaperonin, chloroplastic OS=Arabidopsis thaliana GN=CPN20 PE=1 SV=2"""	3.99	Up	0.0056179	3.755	Up	0.009155	0.445	Down	0.022422	0.473	Down	0.0198391	GO:0050794 regulation of cellular process; GO:1901671 positive regulation of superoxide dismutase activity; GO:1901033 positive regulation of response to reactive oxygen species; GO:1900409 positive regulation of cellular response to oxidative stress; GO:0080134 regulation of response to stress; GO:0006457 protein folding; GO:1902884 positive regulation of response to oxidative stress; GO:0009893…	GO:0044424 intracellular part; GO:0005623 cell; GO:0044464 cell part; GO:0005622 intracellular; GO:0005737 cytoplasm;	GO:0005524 ATP binding; GO:1901265 nucleoside phosphate binding; GO:0001882 nucleoside binding; GO:0043167 ion binding; GO:0000166 nucleotide binding; GO:0097159 organic cyclic compound binding; GO:1901363 heterocyclic compound binding; GO:0032549 ribonucleoside binding; GO:0097367 carbohydrate derivative binding; GO:0046914 transition metal ion binding; GO:0032553 ribonucleotide binding; GO:0005…	--	--	O	Mitochondrial chaperonin
F02_cb9366_c4/f1p0/1820	PREDICTED: Probable aspartyl aminopeptidase OS=Ricinus communis GN=RCOM_1506700 PE=2 SV=2	0.449	Down	0.043096	0.699	--	0.152896	1.553	--	0.106577	0.998	--	0.90864	GO:0006508 proteolysis; GO:0008152 metabolic process; GO:0043170 macromolecule metabolic process; GO:0019538 protein metabolic process; GO:0044238 primary metabolic process; GO:0071704 organic substance metabolic process;	--	GO:0008233 peptidase activity; GO:0008238 exopeptidase activity; GO:0046914 transition metal ion binding; GO:0003824 catalytic activity; GO:0005488 binding; GO:0043167 ion binding; GO:0043169 cation binding; GO:0070011 peptidase activity, acting on L-amino acid peptides; GO:0046872 metal ion binding; GO:0016787 hydrolase activity; GO:0004177 aminopeptidase activity; GO:0008270 zinc ion binding;	--	--	E	Aminopeptidase I zinc metalloprotease (M18)
F01_cb8130_c6/f1p0/1210	unknown [Picea sitchensis]	0.454	Down	0.0097206	0.849	--	0.53164	1.511	--	0.32966	0.808	--	0.37078	--	--	--	--	--	--	--
F02_cb5226_c7/f4p0/2531	Reticulata-related 1 isoform 1 [Theobroma cacao]	1.873	Up	0.022819	0.82	--	0.149095	0.271	Down	0.00065575	0.619	--	0.051541	--	--	--	--	--	--	--
F02_cb9735_c58716/f1p1/2659	PREDICTED: Cysteine-rich receptor-like protein kinase 5 OS=Arabidopsis thaliana GN=CRK5 PE=1 SV=1	1.553	Up	0.040795	--	--	--	--	--	--	--	--	--	GO:0016310 phosphorylation; GO:0044267 cellular protein metabolic process; GO:0044238 primary metabolic process; GO:0044237 cellular metabolic process; GO:0006796 phosphate-containing compound metabolic process; GO:0071704 organic substance metabolic process; GO:0008152 metabolic process; GO:0006468 protein phosphorylation; GO:0006793 phosphorus metabolic process; GO:0044260 cellular macromolecul…	--	GO:0005524 ATP binding; GO:1901265 nucleoside phosphate binding; GO:0016773 phosphotransferase activity, alcohol group as acceptor; GO:0001882 nucleoside binding; GO:0043167 ion binding; GO:0004672 protein kinase activity; GO:0000166 nucleotide binding; GO:0097159 organic cyclic compound binding; GO:1901363 heterocyclic compound binding; GO:0032549 ribonucleoside binding; GO:0097367 carbohydrate …	--	--	T	Serine/threonine protein kinase
F01_cb11739_c12/f8p0/536	PREDICTED: Copper transport protein ATX1 OS=Arabidopsis thaliana GN=ATX1 PE=1 SV=2	2.192	Up	0.0046213	1.823	Up	0.0036431	0.269	Down	0.00025705	0.323	Down	0.00104479	GO:0006810 transport; GO:0051179 localization; GO:0006812 cation transport; GO:0030001 metal ion transport; GO:0006811 ion transport; GO:0051234 establishment of localization;	--	GO:0046872 metal ion binding; GO:0043169 cation binding; GO:0005488 binding; GO:0043167 ion binding;	--	--	P	Copper chaperone
F01_cb14479_c2/f2p0/621	PREDICTED: Universal stress protein A-like protein OS=Arabidopsis thaliana GN=At3g01520 PE=1 SV=2	1.241	Up	0.0072215	--	--	--	--	--	--	--	--	--	GO:0006950 response to stress; GO:0050896 response to stimulus;	--	--	--	--	--	--
F01_cb7623_c3/f1p2/1957	PREDICTED: UDP-glycosyltransferase 79A6 OS=Glycine max GN=FG2 PE=1 SV=1	0.57	Down	0.0121445	0.562	Down	0.0022612	1.473	Up	0.044202	1.495	Up	0.005436	GO:0008152 metabolic process;	--	GO:0016757 transferase activity, transferring glycosyl groups; GO:0016758 transferase activity, transferring hexosyl groups; GO:0003824 catalytic activity; GO:0016740 transferase activity;	--	--	GC	UDP-glucuronosyl and UDP-glucosyl transferase
F01_cb10821_c5/f1p0/1081	PREDICTED: probable leucine-rich repeat receptor-like protein kinase At1g35710 [Vitis vinifera]	1.684	Up	0.0029364	--	--	--	--	--	--	--	--	--	--	--	GO:0005515 protein binding; GO:0005488 binding;	--	--	R	FOG: Leucine rich repeat
F01_cb7284_c14/f1p0/1079	"""PREDICTED: CBS domain-containing protein CBSX3, mitochondrial OS=Arabidopsis thaliana GN=CBSX3 PE=1 SV=1"""	1.484	Up	0.0112834	1.373	--	0.135223	0.769	--	0.141176	0.831	--	0.173437	--	--	--	--	--	--	--
F02_cb15052_c1/f1p0/895	"""hypothetical protein, partial [Pinus taeda]"""	2.421	Up	0.0056037	--	--	--	--	--	--	--	--	--	GO:0006810 transport; GO:0006869 lipid transport; GO:1902578 single-organism localization; GO:0044699 single-organism process; GO:0010876 lipid localization; GO:0071702 organic substance transport; GO:0033036 macromolecule localization; GO:0051179 localization; GO:0044765 single-organism transport; GO:0051234 establishment of localization;	--	GO:0008289 lipid binding; GO:0005488 binding;	--	--	--	--
F01_cb7906_c3/f1p0/781	PREDICTED: bis(5&apos;-adenosyl)-triphosphatase-like [Malus domestica]	1.418	Up	0.031924	0.861	--	0.25916	0.384	Down	0.00022451	0.633	Down	0.029543	--	--	GO:0003824 catalytic activity;	mdm:103422756; bis(5'-adenosyl)-triphosphatase-like; K01522 bis(5'-adenosyl)-triphosphatase [EC:3.6.1.29] (A)	ko00230 Purine metabolism;	FR	Diadenosine polyphosphate hydrolase and related proteins of the histidine triad (HIT) family
F02_cb8614_c11/f1p0/1532	unknown [Picea sitchensis]	0.682	Down	0.044757	0.663	--	0.28862	1.278	--	0.8512	1.314	--	0.065936	GO:0043632 modification-dependent macromolecule catabolic process; GO:0044265 cellular macromolecule catabolic process; GO:0051603 proteolysis involved in cellular protein catabolic process; GO:0044257 cellular protein catabolic process; GO:0019941 modification-dependent protein catabolic process; GO:0044267 cellular protein metabolic process; GO:0006511 ubiquitin-dependent protein catabolic proc…	--	--	pxb:103937083; ubiquitin fusion degradation protein 1 homolog; K14016 ubiquitin fusion degradation protein 1 (A)	ko04141 Protein processing in endoplasmic reticulum;	O	Ubiquitin fusion-degradation protein
F01_cb13350_c13/f9p3/1161	PREDICTED: 60S ribosomal protein L17 OS=Zea mays GN=RPL17 PE=2 SV=1	0.4	Down	0.023561	0.951	--	0.6564	2.332	--	0.101662	0.98	--	0.92432	GO:0006518 peptide metabolic process; GO:0043043 peptide biosynthetic process; GO:0044267 cellular protein metabolic process; GO:0006807 nitrogen compound metabolic process; GO:0009058 biosynthetic process; GO:0043603 cellular amide metabolic process; GO:0044238 primary metabolic process; GO:1901566 organonitrogen compound biosynthetic process; GO:1901576 organic substance biosynthetic process; G…	GO:0005840 ribosome; GO:0043229 intracellular organelle; GO:0043232 intracellular non-membrane-bounded organelle; GO:0044446 intracellular organelle part; GO:0005737 cytoplasm; GO:0032991 macromolecular complex; GO:0044424 intracellular part; GO:0005623 cell; GO:0044422 organelle part; GO:0043228 non-membrane-bounded organelle; GO:0043226 organelle; GO:0015934 large ribosomal subunit; GO:0044391 …	GO:0003735 structural constituent of ribosome; GO:0005198 structural molecule activity;	atr:s00013p00224030; AMTR_s00013p00224030; hypothetical protein; K02880 large subunit ribosomal protein L17e (A)	ko03010 Ribosome;	J	60S ribosomal protein L22
F01_cb8645_c13/f2p0/1480	PREDICTED: Probable aldo-keto reductase 2 OS=Oryza sativa subsp. japonica GN=Os04g0338000 PE=2 SV=2	0.241	Down	0.032196	0.075	Down	0.000102486	0.642	--	0.093177	2.062	--	0.16112	--	--	--	--	--	C	Voltage-gated shaker-like K+ channel, subunit beta/KCNAB
F01_cb14680_c0/f37p2/1213	"""PREDICTED: Glutathione S-transferase DHAR3, chloroplastic OS=Arabidopsis thaliana GN=DHAR3 PE=1 SV=1"""	0.718	Down	0.025802	0.183	Down	0.0038151	0.531	Down	0.0065176	2.089	Up	0.00050443	--	--	GO:0005515 protein binding; GO:0005488 binding;	--	--	P	Intracellular Cl- channel CLIC, contains GST domain
F01_cb11424_c7/f5p0/889	PREDICTED: Ubiquitin-NEDD8-like protein RUB1 OS=Oryza sativa subsp. japonica GN=RUB1 PE=2 SV=2	1.858	Up	0.0184783	1.359	--	0.093823	0.504	Down	0.0056193	0.688	--	0.111481	--	--	GO:0005515 protein binding; GO:0005488 binding;	--	--	OR	Ubiquitin and ubiquitin-like proteins
F01_cb11081_c0/f2p0/850	unknown [Picea sitchensis]	1.67	Up	0.0103995	--	--	--	--	--	--	--	--	--	--	--	--	--	--	--	--
F01_cb5000_c233330/f1p0/1850	PREDICTED: Calnexin homolog 1 OS=Arabidopsis thaliana GN=CNX1 PE=1 SV=1	1.654	Up	0.0097619	0.827	--	0.29986	0.392	Down	0.0074607	0.783	--	0.051081	GO:0006457 protein folding; GO:0009987 cellular process;	GO:0043226 organelle; GO:0043231 intracellular membrane-bounded organelle; GO:0043229 intracellular organelle; GO:0005783 endoplasmic reticulum; GO:0044464 cell part; GO:0005622 intracellular; GO:0005737 cytoplasm; GO:0012505 endomembrane system; GO:0044424 intracellular part; GO:0043227 membrane-bounded organelle; GO:0005623 cell; GO:0044444 cytoplasmic part;	GO:0043169 cation binding; GO:0046872 metal ion binding; GO:0005515 protein binding; GO:0005509 calcium ion binding; GO:0051082 unfolded protein binding; GO:0005488 binding; GO:0043167 ion binding;	pmum:103322176; calnexin homolog; K08054 calnexin (A)	ko04141 Protein processing in endoplasmic reticulum; ko04145 Phagosome;	O	Calnexin
F01_cb2612_c39/f1p0/2932	PREDICTED: Patellin-4 OS=Arabidopsis thaliana GN=PATL4 PE=1 SV=2	1.925	Up	0.041785	0.679	--	0.26556	0.242	Down	0.00126367	0.686	--	0.27654	GO:0006810 transport; GO:0051179 localization; GO:0051234 establishment of localization;	GO:0016020 membrane; GO:0005622 intracellular; GO:0044464 cell part; GO:0044425 membrane part; GO:0031224 intrinsic component of membrane; GO:0005623 cell; GO:0016021 integral component of membrane;	GO:0005215 transporter activity;	--	--	I	Phosphatidylinositol transfer protein SEC14 and related proteins
F02_cb5097_c199/f1p0/2151	PREDICTED: transmembrane 9 superfamily member 2-like isoform X3 [Elaeis guineensis]	1.546	Up	0.0116355	1.032	--	0.83038	0.947	--	0.62364	1.42	Up	0.030744	--	GO:0031224 intrinsic component of membrane; GO:0016020 membrane; GO:0016021 integral component of membrane; GO:0044425 membrane part;	--	--	--	U	Endosomal membrane proteins, EMP70
F02_cb10683_c53/f1p0/1739	PREDICTED: 60S ribosomal protein L3 OS=Oryza sativa subsp. japonica GN=RPL3 PE=2 SV=2	0.568	Down	0.041223	0.963	--	0.72306	2.459	Up	0.03156	1.451	Up	0.034401	GO:0006518 peptide metabolic process; GO:0043043 peptide biosynthetic process; GO:0044267 cellular protein metabolic process; GO:0006807 nitrogen compound metabolic process; GO:0009058 biosynthetic process; GO:0043603 cellular amide metabolic process; GO:0044238 primary metabolic process; GO:1901566 organonitrogen compound biosynthetic process; GO:1901576 organic substance biosynthetic process; G…	GO:0005840 ribosome; GO:0043226 organelle; GO:0043229 intracellular organelle; GO:0043232 intracellular non-membrane-bounded organelle; GO:0044464 cell part; GO:0005622 intracellular; GO:0005737 cytoplasm; GO:0032991 macromolecular complex; GO:0044424 intracellular part; GO:1990904 ribonucleoprotein complex; GO:0005623 cell; GO:0030529 intracellular ribonucleoprotein complex; GO:0044444 cytoplasm…	GO:0003735 structural constituent of ribosome; GO:0005198 structural molecule activity;	vvi:100260533; 60S ribosomal protein L3; K02925 large subunit ribosomal protein L3e (A)	ko03010 Ribosome;	J	60S ribosomal protein L3 and related proteins
F02_cb12224_c14/f1p0/1431	unknown [Picea sitchensis]	1.599	Up	0.00073612	0.932	--	0.59126	1.031	--	0.93152	1.771	Up	2.0496e-05	--	--	GO:0003824 catalytic activity;	--	--	R	Predicted hydrolase/acyltransferase (alpha/beta hydrolase superfamily)
F02_cb11167_c3/f1p0/1493	PREDICTED: Fruit bromelain OS=Ananas comosus PE=1 SV=1	1.208	Up	0.030757	1.119	--	0.64408	1.084	--	0.75346	1.171	--	0.32466	GO:0006508 proteolysis; GO:0008152 metabolic process; GO:0043170 macromolecule metabolic process; GO:0019538 protein metabolic process; GO:0044238 primary metabolic process; GO:0071704 organic substance metabolic process;	--	GO:0070011 peptidase activity, acting on L-amino acid peptides; GO:0008234 cysteine-type peptidase activity; GO:0016787 hydrolase activity; GO:0008233 peptidase activity; GO:0003824 catalytic activity;	--	--	O	Cysteine proteinase Cathepsin L
F02_cb11771_c4/f1p1/1195	PREDICTED: GTP-binding protein SAR1A OS=Arabidopsis thaliana GN=SAR1A PE=2 SV=1	2.144	Up	0.036203	1.969	--	0.089239	0.809	--	0.41402	0.881	--	0.71	GO:0045184 establishment of protein localization; GO:0006810 transport; GO:0046907 intracellular transport; GO:0070727 cellular macromolecule localization; GO:0051649 establishment of localization in cell; GO:0006886 intracellular protein transport; GO:0071702 organic substance transport; GO:0008104 protein localization; GO:0033036 macromolecule localization; GO:0034613 cellular protein localizat…	GO:0005623 cell; GO:0005622 intracellular; GO:0044464 cell part;	GO:1901265 nucleoside phosphate binding; GO:0001882 nucleoside binding; GO:0043167 ion binding; GO:0000166 nucleotide binding; GO:0097159 organic cyclic compound binding; GO:1901363 heterocyclic compound binding; GO:0032549 ribonucleoside binding; GO:0097367 carbohydrate derivative binding; GO:0032553 ribonucleotide binding; GO:0005488 binding; GO:0032550 purine ribonucleoside binding; GO:0043168…	ppp:PHYPADRAFT_192599; Sar13; Sar1-family small GTPase; K07953 GTP-binding protein SAR1 [EC:3.6.5.-] (A)	ko04141 Protein processing in endoplasmic reticulum;	--	--
F01_cb10834_c13/f1p0/904	ubiquitin-conjugating enzyme E2 35-like [Solanum lycopersicum]	1.585	Up	0.020803	1.949	Up	0.031936	0.778	--	0.22252	0.633	Down	0.024896	--	--	--	tcc:TCM_031769; Ubiquitin-conjugating enzyme 36 isoform 1; K10580 ubiquitin-conjugating enzyme E2 N [EC:6.3.2.19] (A)	ko04120 Ubiquitin mediated proteolysis;	O	Ubiquitin-protein ligase
F01_cb10964_c2/f1p0/1593	"""PREDICTED: Porphobilinogen deaminase, chloroplastic OS=Oryza sativa subsp. japonica GN=HEMC PE=2 SV=1"""	0.382	Down	0.039935	1.049	--	0.65814	2.462	Up	0.0090795	0.896	--	0.86268	GO:0018160 peptidyl-pyrromethane cofactor linkage; GO:0006725 cellular aromatic compound metabolic process; GO:0044267 cellular protein metabolic process; GO:0009058 biosynthetic process; GO:1901566 organonitrogen compound biosynthetic process; GO:0044237 cellular metabolic process; GO:0018065 protein-cofactor linkage; GO:0071704 organic substance metabolic process; GO:0008152 metabolic process; …	--	GO:0016765 transferase activity, transferring alkyl or aryl (other than methyl) groups; GO:0004418 hydroxymethylbilane synthase activity; GO:0003824 catalytic activity; GO:0016740 transferase activity;	pda:103709845; porphobilinogen deaminase, chloroplastic-like; K01749 hydroxymethylbilane synthase [EC:2.5.1.61] (A)	ko00860 Porphyrin and chlorophyll metabolism;	H	Porphobilinogen deaminase
F02_cb9735_c120070/f3p2/2004	PREDICTED: UDP-glycosyltransferase 72B1 OS=Arabidopsis thaliana GN=UGT72B1 PE=1 SV=1	2.847	Up	0.0093174	4.478	Up	0.00041567	2.022	Up	0.026241	1.286	--	0.116939	GO:0008152 metabolic process;	--	GO:0016757 transferase activity, transferring glycosyl groups; GO:0016758 transferase activity, transferring hexosyl groups; GO:0003824 catalytic activity; GO:0016740 transferase activity;	--	--	GC	UDP-glucuronosyl and UDP-glucosyl transferase
F02_cb12916_c3/f1p0/1396	PREDICTED: 26S proteasome non-ATPase regulatory subunit 9-like [Pyrus x bretschneideri]	0.748	Down	0.040198	--	--	--	--	--	--	--	--	--	--	--	GO:0005515 protein binding; GO:0005488 binding;	--	--	O	26S proteasome regulatory complex, subunit PSMD9
F02_cb10977_c8/f1p0/1323	"""PREDICTED: Quinone oxidoreductase-like protein At1g23740, chloroplastic OS=Arabidopsis thaliana GN=At1g23740 PE=2 SV=2"""	19.832	Up	3.6551e-07	--	--	--	--	--	--	--	--	--	GO:0044699 single-organism process; GO:0008152 metabolic process; GO:0055114 oxidation-reduction process; GO:0044710 single-organism metabolic process;	--	GO:0003824 catalytic activity; GO:0016491 oxidoreductase activity;	--	--	CR	Zinc-binding oxidoreductase
F02_cb5357_c30/f1p0/1833	unknown [Picea sitchensis]	1.259	Up	0.049422	1.328	--	0.0629	0.802	--	0.091724	0.761	Down	0.039498	GO:0045184 establishment of protein localization; GO:0006810 transport; GO:0071702 organic substance transport; GO:0051179 localization; GO:0033036 macromolecule localization; GO:0008104 protein localization; GO:0015031 protein transport; GO:0051234 establishment of localization;	GO:0016020 membrane;	--	ppp:PHYPADRAFT_215299; hypothetical protein; K10956 protein transport protein SEC61 subunit alpha (A)	ko04141 Protein processing in endoplasmic reticulum; ko04145 Phagosome; ko03060 Protein export;	UO	Transport protein Sec61, alpha subunit
F02_cb8426_c3/f1p0/1981	predicted protein [Physcomitrella patens]	0.732	Down	0.042542	--	--	--	--	--	--	--	--	--	GO:0043632 modification-dependent macromolecule catabolic process; GO:0070646 protein modification by small protein removal; GO:0044265 cellular macromolecule catabolic process; GO:0051603 proteolysis involved in cellular protein catabolic process; GO:0044257 cellular protein catabolic process; GO:0019941 modification-dependent protein catabolic process; GO:0044267 cellular protein metabolic proc…	--	GO:0008233 peptidase activity; GO:0036459 thiol-dependent ubiquitinyl hydrolase activity; GO:0003824 catalytic activity; GO:0101005 ubiquitinyl hydrolase activity; GO:0070011 peptidase activity, acting on L-amino acid peptides; GO:0019783 ubiquitin-like protein-specific protease activity; GO:0008234 cysteine-type peptidase activity; GO:0016787 hydrolase activity;	--	--	O	Ubiquitin-specific protease
F02_cb8066_c3/f1p0/2137	PREDICTED: probable ureidoglycolate hydrolase [Elaeis guineensis]	1.27	Up	0.007618	0.796	--	0.104799	0.705	--	0.082896	1.125	--	0.1013	GO:0008152 metabolic process;	--	GO:0016787 hydrolase activity; GO:0003824 catalytic activity; GO:0016810 hydrolase activity, acting on carbon-nitrogen (but not peptide) bonds; GO:0016813 hydrolase activity, acting on carbon-nitrogen (but not peptide) bonds, in linear amidines;	pda:103724144; ureidoglycolate hydrolase; K18151 ureidoglycolate amidohydrolase [EC:3.5.1.116] (A)	ko00230 Purine metabolism;	--	--
F02_cb9132_c1/f1p0/1876	PREDICTED: mitochondrial import inner membrane translocase subunit TIM50-like [Nelumbo nucifera]	1.368	Up	0.0117753	0.988	--	0.88936	0.796	Down	0.047045	1.101	--	0.29622	--	--	--	--	--	K	TFIIF-interacting CTD phosphatase, including NLI-interacting factor (involved in RNA polymerase II regulation)
F02_cb11554_c12/f1p0/1782	PREDICTED: GRF1-interacting factor 1 OS=Arabidopsis thaliana GN=GIF1 PE=1 SV=1	0.262	Down	0.039415	0.471	--	0.131417	0.983	--	0.67154	0.546	--	0.2506	--	--	GO:0000989 transcription factor activity, transcription factor binding; GO:0003713 transcription coactivator activity; GO:0003712 transcription cofactor activity; GO:0000988 transcription factor activity, protein binding;	--	--	K	Calcium-responsive transcription coactivator
F02_cb10199_c5/f1p0/1294	"""PREDICTED: Peroxisomal 2,4-dienoyl-CoA reductase OS=Arabidopsis thaliana GN=At3g12800 PE=2 SV=1"""	3.056	Up	0.0080966	1.271	--	0.193502	0.861	--	0.21956	2.07	Up	0.045304	--	--	--	mus:103979005; peroxisomal 2,4-dienoyl-CoA reductase-like; K13237 peroxisomal 2,4-dienoyl-CoA reductase [EC:1.3.1.34] (A)	ko04146 Peroxisome;	R	Reductases with broad range of substrate specificities
F01_cb8661_c20/f1p0/1419	PREDICTED: Probable carboxylesterase Os04g0669500 OS=Oryza sativa subsp. japonica GN=Os04g0669500 PE=3 SV=1	0.156	Down	0.0060614	0.109	Down	0.0107752	0.697	--	0.21142	0.998	--	0.796	--	--	GO:0016787 hydrolase activity; GO:0003824 catalytic activity;	pxb:103946057; acyl-protein thioesterase 1-like; K06130 lysophospholipase II [EC:3.1.1.5] (A)	ko00564 Glycerophospholipid metabolism;	I	Lysophospholipase
F02_cb9735_c2428/f6p3/2667	PREDICTED: Protein EDS1 OS=Arabidopsis thaliana GN=EDS1 PE=1 SV=1	6.466	Up	0.0091763	14.396	Up	3.5309e-06	2.042	Up	0.0158211	0.917	--	0.90384	GO:0044699 single-organism process; GO:0008152 metabolic process; GO:0044238 primary metabolic process; GO:0044710 single-organism metabolic process; GO:0006629 lipid metabolic process; GO:0071704 organic substance metabolic process;	--	--	--	--	--	--
F02_cb15297_c1/f1p0/1379	PREDICTED: Peroxidase 4 OS=Vitis vinifera GN=GSVIVT00023967001 PE=1 SV=1	2.177	Up	0.0126435	0.747	--	0.198502	0.261	Down	0.0033426	0.76	--	0.15956	GO:0008152 metabolic process; GO:0042743 hydrogen peroxide metabolic process; GO:0006950 response to stress; GO:0072593 reactive oxygen species metabolic process; GO:0055114 oxidation-reduction process; GO:0044710 single-organism metabolic process; GO:0006979 response to oxidative stress; GO:0044699 single-organism process; GO:0044248 cellular catabolic process; GO:0050896 response to stimulus; G…	--	GO:0097159 organic cyclic compound binding; GO:1901363 heterocyclic compound binding; GO:0020037 heme binding; GO:0003824 catalytic activity; GO:0005488 binding; GO:0016209 antioxidant activity; GO:0004601 peroxidase activity; GO:0046906 tetrapyrrole binding; GO:0016491 oxidoreductase activity; GO:0016684 oxidoreductase activity, acting on peroxide as acceptor;	pda:103703770; peroxidase 72-like; K00430 peroxidase [EC:1.11.1.7] (A)	ko00940 Phenylpropanoid biosynthesis; ko00360 Phenylalanine metabolism;	--	--
F02_cb9735_c19097/f1p0/3196	PREDICTED: protein transport protein SEC31 homolog B-like [Elaeis guineensis]	1.339	Up	0.025881	0.758	--	0.069515	0.636	Down	0.0084191	1.123	--	0.34176	--	--	GO:0005515 protein binding; GO:0005488 binding;	pda:103716930; protein transport protein Sec31A-like; K14005 protein transport protein SEC31 (A)	ko04141 Protein processing in endoplasmic reticulum;	U	Vesicle coat complex COPII, subunit SEC31
F01_cb56_c22/f1p0/3061	PREDICTED: Aminopeptidase M1 OS=Arabidopsis thaliana GN=APM1 PE=1 SV=1	0.235	Down	0.00152198	0.243	--	0.165858	0.515	Down	0.0038849	0.496	--	0.157441	--	--	GO:0008233 peptidase activity; GO:0046914 transition metal ion binding; GO:0003824 catalytic activity; GO:0005488 binding; GO:0043167 ion binding; GO:0070011 peptidase activity, acting on L-amino acid peptides; GO:0046872 metal ion binding; GO:0043169 cation binding; GO:0016787 hydrolase activity; GO:0008237 metallopeptidase activity; GO:0008270 zinc ion binding;	--	--	EO	Puromycin-sensitive aminopeptidase and related aminopeptidases
F01_cb5000_c244182/f1p0/1787	unknown [Picea sitchensis]	0.743	Down	0.0132568	0.546	--	0.096904	0.574	--	0.173243	0.781	--	0.068756	--	--	GO:0005515 protein binding; GO:0005488 binding;	--	--	J	Predicted translation factor, contains W2 domain
F02_cb13157_c2/f1p0/1467	unknown [Picea sitchensis]	11.491	Up	0.0026158	1.928	--	0.2171	0.291	Down	0.03824	1.736	--	0.099024	--	--	--	--	--	--	--
F02_cb7390_c5/f1p0/1846	hypothetical protein AMTR_s00055p00019700 [Amborella trichopoda]	0.65	Down	0.0131788	0.534	--	0.22032	0.614	--	0.27268	0.747	--	0.056317	--	--	--	--	--	--	--
F01_cb9994_c5/f1p0/1482	"""PREDICTED: Quinone oxidoreductase-like protein At1g23740, chloroplastic OS=Arabidopsis thaliana GN=At1g23740 PE=2 SV=2"""	0.457	Down	0.027861	--	--	--	--	--	--	--	--	--	GO:0044699 single-organism process; GO:0008152 metabolic process; GO:0055114 oxidation-reduction process; GO:0044710 single-organism metabolic process;	--	GO:0003824 catalytic activity; GO:0016491 oxidoreductase activity;	--	--	CR	Zinc-binding oxidoreductase
F02_cb1292_c21/f1p0/1639	hypothetical protein PHAVU_008G267600g [Phaseolus vulgaris]	2.978	Up	0.000178353	4.039	Up	0.0005429	2.429	Up	0.0035443	1.791	Up	0.00125955	GO:0050794 regulation of cellular process; GO:0044700 single organism signaling; GO:0051716 cellular response to stimulus; GO:0007165 signal transduction; GO:0050789 regulation of biological process; GO:0007154 cell communication; GO:0044699 single-organism process; GO:0023052 signaling; GO:0050896 response to stimulus; GO:0009987 cellular process; GO:0065007 biological regulation;	--	GO:0005515 protein binding; GO:0005488 binding;	--	--	--	--
F02_cb10737_c16/f1p3/1708	PREDICTED: Actin-1 OS=Oryza sativa subsp. indica GN=ACT1 PE=2 SV=1	0.269	Down	0.035699	1.344	--	0.2319	4.849	Up	0.0067619	0.969	--	0.942	--	--	--	--	--	Z	Actin and related proteins
F01_cb13235_c2/f1p0/1282	"""PREDICTED: Outer envelope pore protein 24A, chloroplastic OS=Arabidopsis thaliana GN=OEP24A PE=1 SV=1"""	1.55	Up	0.037843	1.205	--	0.131816	0.747	--	0.063455	0.961	--	0.83708	--	--	--	--	--	--	--
F02_cb4985_c2/f1p0/2090	hypothetical protein AMTR_s00165p00037490 [Amborella trichopoda]	1.64	Up	0.0135041	--	--	--	--	--	--	--	--	--	--	--	GO:0005515 protein binding; GO:0005488 binding;	--	--	O	FKBP-type peptidyl-prolyl cis-trans isomerase
F01_cb10229_c14/f42p1/906	"""PREDICTED: Outer envelope pore protein 16-1, chloroplastic OS=Arabidopsis thaliana GN=OEP161 PE=1 SV=1"""	1.546	Up	0.03662	1.139	--	0.6035	0.569	Down	0.031165	0.772	--	0.177458	--	--	--	--	--	--	--
F01_cb11609_c7/f1p1/1374	unknown [Picea sitchensis]	0.193	Down	0.00078405	--	--	--	--	--	--	--	--	--	--	--	GO:0097159 organic cyclic compound binding; GO:1901363 heterocyclic compound binding; GO:1901265 nucleoside phosphate binding; GO:0005488 binding; GO:0003676 nucleic acid binding; GO:0000166 nucleotide binding; GO:0036094 small molecule binding;	--	--	A	Splicing factor hnRNP-F and related RNA-binding proteins
F01_cb12927_c3/f1p0/1498	hypothetical protein AMTR_s00065p00207880 [Amborella trichopoda]	1.677	Up	0.045162	1.376	Up	0.039361	1.157	--	0.237	1.41	--	0.122519	GO:0043648 dicarboxylic acid metabolic process; GO:0016053 organic acid biosynthetic process; GO:0006725 cellular aromatic compound metabolic process; GO:0044699 single-organism process; GO:0009058 biosynthetic process; GO:1901566 organonitrogen compound biosynthetic process; GO:0044237 cellular metabolic process; GO:0071704 organic substance metabolic process; GO:0008152 metabolic process; GO:00…	--	GO:0004106 chorismate mutase activity; GO:0016853 isomerase activity; GO:0003824 catalytic activity; GO:0016866 intramolecular transferase activity;	atr:s00065p00207880; AMTR_s00065p00207880; hypothetical protein; K01850 chorismate mutase [EC:5.4.99.5] (A)	ko01230 Biosynthesis of amino acids; ko00400 Phenylalanine, tyrosine and tryptophan biosynthesis;	E	Chorismate mutase
F01_cb10097_c6/f1p3/1101	PREDICTED: Elongation factor 1-delta OS=Pimpinella brachycarpa PE=2 SV=3	0.057	Down	0.0037981	0.046	Down	0.0140384	0.397	Down	0.022137	0.495	--	0.30168	GO:0006518 peptide metabolic process; GO:0006414 translational elongation; GO:0043043 peptide biosynthetic process; GO:0044267 cellular protein metabolic process; GO:0006807 nitrogen compound metabolic process; GO:0009058 biosynthetic process; GO:0043603 cellular amide metabolic process; GO:0044238 primary metabolic process; GO:1901566 organonitrogen compound biosynthetic process; GO:1901576 orga…	GO:0044464 cell part; GO:0005622 intracellular; GO:0005737 cytoplasm; GO:0032991 macromolecular complex; GO:0044424 intracellular part; GO:0043234 protein complex; GO:0005623 cell; GO:0044444 cytoplasmic part; GO:0005853 eukaryotic translation elongation factor 1 complex;	GO:0097159 organic cyclic compound binding; GO:1901363 heterocyclic compound binding; GO:0003723 RNA binding; GO:0008135 translation factor activity, RNA binding; GO:0003746 translation elongation factor activity; GO:0005488 binding; GO:0003676 nucleic acid binding;	--	--	K	Elongation factor 1 beta/delta chain
F02_cb10984_c2/f2p0/1093	hypothetical protein CICLE_v10002689mg [Citrus clementina]	1.803	Up	0.0051405	4.739	Up	0.0008989	5.619	Up	0.0006363	2.138	Up	0.00170305	GO:0006950 response to stress; GO:0050896 response to stimulus;	--	--	--	--	--	--
F02_cb3436_c29/f1p0/879	predicted protein [Physcomitrella patens]	1.403	Up	0.039299	--	--	--	--	--	--	--	--	--	GO:0051188 cofactor biosynthetic process; GO:0009116 nucleoside metabolic process; GO:0042278 purine nucleoside metabolic process; GO:0009117 nucleotide metabolic process; GO:0044699 single-organism process; GO:0046129 purine ribonucleoside biosynthetic process; GO:0009163 nucleoside biosynthetic process; GO:0009058 biosynthetic process; GO:0044237 cellular metabolic process; GO:0006796 phosphate…	--	GO:0005524 ATP binding; GO:1901265 nucleoside phosphate binding; GO:0016773 phosphotransferase activity, alcohol group as acceptor; GO:0001882 nucleoside binding; GO:0043167 ion binding; GO:0000166 nucleotide binding; GO:0004594 pantothenate kinase activity; GO:0097159 organic cyclic compound binding; GO:1901363 heterocyclic compound binding; GO:0032549 ribonucleoside binding; GO:0097367 carbohyd…	ppp:PHYPADRAFT_158661; hypothetical protein; K09680 type II pantothenate kinase [EC:2.7.1.33] (A)	ko00770 Pantothenate and CoA biosynthesis;	H	Pantothenate kinase PanK and related proteins
F01_cb7414_c29/f1p1/2003	PREDICTED: Elongation factor 1-gamma OS=Prunus avium PE=2 SV=1	0.105	Down	0.0114626	0.26	Down	3.0743e-06	4.444	--	0.057658	1.787	--	0.169801	GO:0006518 peptide metabolic process; GO:0006414 translational elongation; GO:0043043 peptide biosynthetic process; GO:0044267 cellular protein metabolic process; GO:0006807 nitrogen compound metabolic process; GO:0009058 biosynthetic process; GO:0043603 cellular amide metabolic process; GO:0044238 primary metabolic process; GO:1901566 organonitrogen compound biosynthetic process; GO:1901576 orga…	--	GO:0097159 organic cyclic compound binding; GO:1901363 heterocyclic compound binding; GO:0003723 RNA binding; GO:0008135 translation factor activity, RNA binding; GO:0005515 protein binding; GO:0003746 translation elongation factor activity; GO:0005488 binding; GO:0003676 nucleic acid binding;	--	--	J	Translation elongation factor EF-1 gamma
F01_cb5000_c161534/f1p1/2266	PREDICTED: Lipase-like PAD4 OS=Arabidopsis thaliana GN=PAD4 PE=1 SV=1	0.724	Down	0.005039	0.705	Down	0.038063	0.432	Down	0.00117797	0.444	Down	0.00052139	GO:0044699 single-organism process; GO:0008152 metabolic process; GO:0044238 primary metabolic process; GO:0044710 single-organism metabolic process; GO:0006629 lipid metabolic process; GO:0071704 organic substance metabolic process;	--	--	--	--	--	--
F01_cb14928_c1/f1p1/1407	"""PREDICTED: Protein CHAPERONE-LIKE PROTEIN OF POR1, chloroplastic OS=Arabidopsis thaliana GN=CPP1 PE=1 SV=1"""	1.767	Up	0.0114412	1.227	--	0.095261	0.535	Down	0.00159733	0.77	--	0.140522	--	--	--	--	--	--	--
F02_cb14719_c1/f1p0/1413	PREDICTED: protein pkiA isoform X1 [Phoenix dactylifera]	2.333	Up	0.037079	--	--	--	--	--	--	--	--	--	--	--	GO:0003824 catalytic activity;	--	--	T	Zinc-binding protein of the histidine triad (HIT) family
F01_cb15308_c0/f4p0/1286	unnamed protein product [Vitis vinifera]	0.171	Down	0.00073912	--	--	--	--	--	--	--	--	--	--	--	--	--	--	--	--
F01_cb6704_c2/f1p0/2115	PREDICTED: Methionine aminopeptidase 1A OS=Arabidopsis thaliana GN=MAP1A PE=1 SV=1	0.478	Down	0.0030156	--	--	--	--	--	--	--	--	--	GO:0006508 proteolysis; GO:0008152 metabolic process; GO:0043170 macromolecule metabolic process; GO:0019538 protein metabolic process; GO:0044238 primary metabolic process; GO:0071704 organic substance metabolic process;	--	GO:0008233 peptidase activity; GO:0008238 exopeptidase activity; GO:0003824 catalytic activity; GO:0008235 metalloexopeptidase activity; GO:0070011 peptidase activity, acting on L-amino acid peptides; GO:0016787 hydrolase activity; GO:0004177 aminopeptidase activity; GO:0008237 metallopeptidase activity;	--	--	O	Putative methionine aminopeptidase
F01_cb8427_c4/f1p0/1863	PREDICTED: Scopoletin glucosyltransferase OS=Nicotiana tabacum GN=TOGT1 PE=1 SV=1	0.192	Down	0.0022227	0.385	Down	0.00056409	4.397	Up	0.00047619	2.187	Up	0.0179595	GO:0008152 metabolic process;	--	GO:0016757 transferase activity, transferring glycosyl groups; GO:0016758 transferase activity, transferring hexosyl groups; GO:0003824 catalytic activity; GO:0016740 transferase activity;	--	--	GC	UDP-glucuronosyl and UDP-glucosyl transferase
F01_cb3835_c0/f5p0/2660	hypothetical protein SELMODRAFT_84522 [Selaginella moellendorffii]	1.66	Up	0.0087975	0.951	--	0.70474	0.885	--	0.54796	1.545	Up	0.0153564	--	GO:0016020 membrane; GO:0019867 outer membrane;	--	--	--	--	--
F02_cb15086_c2/f2p0/1515	PREDICTED: F-box protein PP2-B11 OS=Arabidopsis thaliana GN=PP2B11 PE=1 SV=1	4.968	Up	5.6525e-05	3.847	Up	0.00024193	1.359	Up	0.02926	1.755	Up	0.0060956	--	--	GO:0005515 protein binding; GO:0005488 binding;	--	--	--	--
F02_cb13564_c1/f2p0/816	PREDICTED: Thioredoxin-like protein Clot OS=Arabidopsis thaliana GN=At5g42850 PE=2 SV=1	1.498	Up	0.039744	1.287	--	0.057542	0.419	Down	0.00082117	0.487	Down	0.0065016	--	--	--	--	--	S	Uncharacterized conserved protein
F01_cb14757_c1/f1p0/1005	PREDICTED: signal peptidase complex catalytic subunit SEC11A [Nelumbo nucifera]	1.661	Up	0.0144556	1.069	--	0.67866	0.56	Down	0.0080751	0.871	--	0.40808	GO:0006518 peptide metabolic process; GO:0006465 signal peptide processing; GO:0044267 cellular protein metabolic process; GO:0006807 nitrogen compound metabolic process; GO:0016485 protein processing; GO:0043603 cellular amide metabolic process; GO:0044238 primary metabolic process; GO:0044237 cellular metabolic process; GO:0071704 organic substance metabolic process; GO:0008152 metabolic proces…	GO:0016020 membrane;	GO:0008233 peptidase activity; GO:0016787 hydrolase activity; GO:0003824 catalytic activity;	brp:103871202; signal peptidase complex catalytic subunit SEC11C-like; K13280 signal peptidase, endoplasmic reticulum-type [EC:3.4.-.-] (A)	ko03060 Protein export;	U	Signal peptidase I
F01_cb10496_c6/f1p1/1653	PREDICTED: 60S ribosomal protein L3 OS=Oryza sativa subsp. japonica GN=RPL3 PE=2 SV=2	0.538	Down	0.007679	0.989	--	0.8028	2.544	Up	0.02294	1.383	Up	0.026962	GO:0006518 peptide metabolic process; GO:0043043 peptide biosynthetic process; GO:0044267 cellular protein metabolic process; GO:0006807 nitrogen compound metabolic process; GO:0009058 biosynthetic process; GO:0043603 cellular amide metabolic process; GO:0044238 primary metabolic process; GO:1901566 organonitrogen compound biosynthetic process; GO:1901576 organic substance biosynthetic process; G…	GO:0005840 ribosome; GO:0043226 organelle; GO:0043229 intracellular organelle; GO:0043232 intracellular non-membrane-bounded organelle; GO:0044464 cell part; GO:0005622 intracellular; GO:0005737 cytoplasm; GO:0032991 macromolecular complex; GO:0044424 intracellular part; GO:1990904 ribonucleoprotein complex; GO:0005623 cell; GO:0030529 intracellular ribonucleoprotein complex; GO:0044444 cytoplasm…	GO:0003735 structural constituent of ribosome; GO:0005198 structural molecule activity;	vvi:100260533; 60S ribosomal protein L3; K02925 large subunit ribosomal protein L3e (A)	ko03010 Ribosome;	J	60S ribosomal protein L3 and related proteins
F01_cb13331_c4/f1p0/1101	"""PREDICTED: Chlorophyllase-2, chloroplastic OS=Arabidopsis thaliana GN=CLH2 PE=1 SV=1"""	0.295	Down	0.00028037	--	--	--	--	--	--	--	--	--	GO:0006725 cellular aromatic compound metabolic process; GO:0015994 chlorophyll metabolic process; GO:0044699 single-organism process; GO:0044237 cellular metabolic process; GO:0071704 organic substance metabolic process; GO:0044270 cellular nitrogen compound catabolic process; GO:0008152 metabolic process; GO:0006778 porphyrin-containing compound metabolic process; GO:0051187 cofactor catabolic …	--	GO:0016787 hydrolase activity; GO:0052689 carboxylic ester hydrolase activity; GO:0047746 chlorophyllase activity; GO:0003824 catalytic activity; GO:0016788 hydrolase activity, acting on ester bonds;	cit:102620504; chlorophyllase-2, chloroplastic-like; K08099 chlorophyllase [EC:3.1.1.14] (A)	ko00860 Porphyrin and chlorophyll metabolism;	--	--
F01_cb12315_c3/f1p1/917	unknown [Picea sitchensis]	0.349	Down	0.0028632	--	--	--	--	--	--	--	--	--	--	--	GO:0016741 transferase activity, transferring one-carbon groups; GO:0008171 O-methyltransferase activity; GO:0008168 methyltransferase activity; GO:0003824 catalytic activity; GO:0016740 transferase activity;	ppp:PHYPADRAFT_229935; hypothetical protein; K00545 catechol O-methyltransferase [EC:2.1.1.6] (A)	ko00965 Betalain biosynthesis; ko00350 Tyrosine metabolism;	Q	O-methyltransferase
F01_cb11356_c14/f1p0/1632	PREDICTED: Ras-related protein RABE1c OS=Arabidopsis thaliana GN=RABE1C PE=1 SV=1	1.804	Up	0.0051244	1.365	--	0.17534	0.908	--	0.50774	1.2	--	0.20418	GO:0050794 regulation of cellular process; GO:0044700 single organism signaling; GO:0051716 cellular response to stimulus; GO:0007165 signal transduction; GO:0050789 regulation of biological process; GO:0007154 cell communication; GO:0035556 intracellular signal transduction; GO:0044699 single-organism process; GO:0007264 small GTPase mediated signal transduction; GO:0023052 signaling; GO:0050896…	--	GO:1901265 nucleoside phosphate binding; GO:0001882 nucleoside binding; GO:0043167 ion binding; GO:0000166 nucleotide binding; GO:0097159 organic cyclic compound binding; GO:1901363 heterocyclic compound binding; GO:0032549 ribonucleoside binding; GO:0097367 carbohydrate derivative binding; GO:0032553 ribonucleotide binding; GO:0005488 binding; GO:0032550 purine ribonucleoside binding; GO:0043168…	--	--	TU	GTP-binding protein SEC4, small G protein superfamily, and related Ras family GTP-binding proteins
F02_cb10860_c11/f1p4/1752	PREDICTED: Scopoletin glucosyltransferase OS=Nicotiana tabacum GN=TOGT1 PE=1 SV=1	2.481	Up	0.026982	6.183	Up	0.00036241	3.056	Up	0.0020773	1.226	--	0.39012	GO:0008152 metabolic process;	--	GO:0016757 transferase activity, transferring glycosyl groups; GO:0016758 transferase activity, transferring hexosyl groups; GO:0003824 catalytic activity; GO:0016740 transferase activity;	--	--	GC	UDP-glucuronosyl and UDP-glucosyl transferase
F01_cb9707_c7/f1p0/1203	PREDICTED: Serine acetyltransferase 5 OS=Arabidopsis thaliana GN=SAT5 PE=1 SV=1	1.964	Up	0.0024964	1.532	--	0.053536	0.65	Down	0.022123	0.833	--	0.30852	GO:0000097 sulfur amino acid biosynthetic process; GO:0016053 organic acid biosynthetic process; GO:0044699 single-organism process; GO:0009058 biosynthetic process; GO:1901566 organonitrogen compound biosynthetic process; GO:0044237 cellular metabolic process; GO:0044272 sulfur compound biosynthetic process; GO:0000096 sulfur amino acid metabolic process; GO:0071704 organic substance metabolic p…	GO:0044424 intracellular part; GO:0005623 cell; GO:0044464 cell part; GO:0005622 intracellular; GO:0005737 cytoplasm;	GO:0016746 transferase activity, transferring acyl groups; GO:0009001 serine O-acetyltransferase activity; GO:0003824 catalytic activity; GO:0016412 serine O-acyltransferase activity; GO:0016413 O-acetyltransferase activity; GO:0016740 transferase activity; GO:0016747 transferase activity, transferring acyl groups other than amino-acyl groups; GO:0016407 acetyltransferase activity; GO:0008374 O-a…	smo:SELMODRAFT_132502; hypothetical protein; K00640 serine O-acetyltransferase [EC:2.3.1.30] (A)	ko00270 Cysteine and methionine metabolism; ko01200 Carbon metabolism; ko01230 Biosynthesis of amino acids; ko00920 Sulfur metabolism;	E	Serine O-acetyltransferase
F02_cb7406_c12/f1p0/1952	PREDICTED: UDP-glycosyltransferase 86A2 OS=Arabidopsis thaliana GN=UGT86A2 PE=2 SV=1	0.517	Down	0.0118399	0.943	--	0.54446	3.449	Up	0.00050364	1.892	Up	0.035678	GO:0008152 metabolic process;	--	GO:0016757 transferase activity, transferring glycosyl groups; GO:0016758 transferase activity, transferring hexosyl groups; GO:0003824 catalytic activity; GO:0016740 transferase activity;	--	--	GC	UDP-glucuronosyl and UDP-glucosyl transferase
F01_cb12953_c6/f1p0/943	"""PREDICTED: DNA-directed RNA polymerases II, IV and V subunit 9A [Vitis vinifera]"""	0.646	Down	0.026758	0.857	--	0.5062	1.434	--	0.32448	1.08	--	0.63616	GO:0006725 cellular aromatic compound metabolic process; GO:0097659 nucleic acid-templated transcription; GO:0009058 biosynthetic process; GO:0044237 cellular metabolic process; GO:0071704 organic substance metabolic process; GO:0008152 metabolic process; GO:0046483 heterocycle metabolic process; GO:0019438 aromatic compound biosynthetic process; GO:0006139 nucleobase-containing compound metaboli…	--	GO:0097159 organic cyclic compound binding; GO:1901363 heterocyclic compound binding; GO:0046914 transition metal ion binding; GO:0005488 binding; GO:0003676 nucleic acid binding; GO:0043167 ion binding; GO:0046872 metal ion binding; GO:0043169 cation binding; GO:0008270 zinc ion binding;	vvi:100253286; DNA-directed RNA polymerases II, IV and V subunit 9A; K03017 DNA-directed RNA polymerase II subunit RPB9 (A)	ko00230 Purine metabolism; ko00240 Pyrimidine metabolism; ko03020 RNA polymerase;	K	RNA polymerase II subunit 9
F01_cb14917_c0/f1p1/1612	PREDICTED: uncharacterized protein YKR070W isoform X8 [Vitis vinifera]	0.476	Down	0.0151388	0.737	--	0.132964	1.738	Up	0.022917	1.124	--	0.5345	--	--	--	--	--	R	Predicted phosphatase
F01_cb8830_c7/f1p0/1133	PREDICTED: 2-hydroxyisoflavanone dehydratase OS=Glycyrrhiza echinata GN=HIDM PE=1 SV=1	0.691	Down	0.0068443	0.56	Down	0.027503	0.649	Down	0.0101029	0.801	--	0.186545	GO:0008152 metabolic process;	--	GO:0016787 hydrolase activity; GO:0003824 catalytic activity;	--	--	V	Arylacetamide deacetylase
F01_cb13577_c5/f1p0/488	defensin 3 [Pinus sylvestris]	0.236	Down	0.020523	0.434	Down	0.046723	0.37	Down	0.038976	0.201	Down	0.0115968	GO:0006952 defense response; GO:0050896 response to stimulus; GO:0006950 response to stress;	--	--	--	--	--	--
F01_cb9724_c15/f1p0/944	PREDICTED: 40S ribosomal protein S8 OS=Oryza sativa subsp. japonica GN=RPS8 PE=2 SV=2	0.317	Down	0.042104	--	--	--	--	--	--	--	--	--	--	--	--	atr:s00109p00031400; AMTR_s00109p00031400; hypothetical protein; K02995 small subunit ribosomal protein S8e (A)	ko03010 Ribosome;	J	40S ribosomal protein S8
F01_cb10968_c5/f1p0/1291	PREDICTED: Mitochondrial import receptor subunit TOM20 OS=Solanum tuberosum GN=TOM20 PE=1 SV=1	1.374	Up	0.0174599	1.711	Up	0.00190021	1.795	Up	0.00119724	1.442	Up	0.012082	GO:0016043 cellular component organization; GO:0046907 intracellular transport; GO:0072594 establishment of protein localization to organelle; GO:0007006 mitochondrial membrane organization; GO:0017038 protein import; GO:0006839 mitochondrial transport; GO:0044699 single-organism process; GO:0015031 protein transport; GO:0051234 establishment of localization; GO:0006605 protein targeting; GO:0045…	GO:0016020 membrane; GO:0019867 outer membrane; GO:0031090 organelle membrane; GO:0098796 membrane protein complex; GO:0005737 cytoplasm; GO:0032991 macromolecular complex; GO:0098798 mitochondrial protein complex; GO:0044424 intracellular part; GO:0044455 mitochondrial membrane part; GO:0005623 cell; GO:0044422 organelle part; GO:0005740 mitochondrial envelope; GO:0044425 membrane part; GO:00444…	GO:0005515 protein binding; GO:0005488 binding;	--	--	--	--
F02_cb1476_c9/f1p1/2946	PREDICTED: Protein GRIP OS=Arabidopsis thaliana GN=GRIP PE=1 SV=2	1.51	Up	0.043136	--	--	--	--	--	--	--	--	--	GO:0046907 intracellular transport; GO:0034067 protein localization to Golgi apparatus; GO:0072594 establishment of protein localization to organelle; GO:0006891 intra-Golgi vesicle-mediated transport; GO:0016192 vesicle-mediated transport; GO:0000301 retrograde transport, vesicle recycling within Golgi; GO:0072600 establishment of protein localization to Golgi; GO:0048193 Golgi vesicle transport…	--	GO:0005515 protein binding; GO:0005488 binding;	--	--	--	--
F02_cb11735_c4/f1p1/1003	unknown [Picea sitchensis]	2.106	Up	0.032137	1.659	--	0.078399	0.611	--	0.056843	0.776	--	0.46906	--	--	--	--	--	--	--
F01_cb15604_c2/f2p0/1000	unknown [Picea sitchensis]	0.503	Down	0.0179788	0.294	--	0.093002	0.555	--	0.184897	0.949	--	0.64538	--	--	--	--	--	--	--
F02_cb5094_c12/f1p1/2503	hypothetical protein AMTR_s00020p00225970 [Amborella trichopoda]	1.973	Up	0.0151212	--	--	--	--	--	--	--	--	--	GO:0006506 GPI anchor biosynthetic process; GO:0009247 glycolipid biosynthetic process; GO:1903509 liposaccharide metabolic process; GO:0046486 glycerolipid metabolic process; GO:0006661 phosphatidylinositol biosynthetic process; GO:0006643 membrane lipid metabolic process; GO:0008654 phospholipid biosynthetic process; GO:0044267 cellular protein metabolic process; GO:0044699 single-organism proc…	GO:0016020 membrane; GO:0043229 intracellular organelle; GO:0005783 endoplasmic reticulum; GO:0042175 nuclear outer membrane-endoplasmic reticulum membrane network; GO:0005737 cytoplasm; GO:0044446 intracellular organelle part; GO:0012505 endomembrane system; GO:0031224 intrinsic component of membrane; GO:0032991 macromolecular complex; GO:0044424 intracellular part; GO:0005623 cell; GO:0016021 i…	--	atr:s00020p00225970; AMTR_s00020p00225970; hypothetical protein; K05291 phosphatidylinositol glycan, class S (A)	ko00563 Glycosylphosphatidylinositol(GPI)-anchor biosynthesis;	MO	GPI transamidase complex, GPI17/PIG-S component, involved in glycosylphosphatidylinositol anchor biosynthesis
F02_cb10350_c5/f1p0/1472	unknown [Picea sitchensis]	1.449	Up	0.041518	1.333	Up	0.0188562	0.635	Down	0.0060616	0.69	Down	0.040319	--	--	--	--	--	--	--
F01_cb8090_c8/f2p0/1528	PREDICTED: Probable protein phosphatase 2C 59 OS=Arabidopsis thaliana GN=WIN2 PE=1 SV=1	0.511	Down	0.047798	0.827	Down	0.0084227	2.231	Up	0.00074309	1.379	--	0.22942	--	--	GO:0043169 cation binding; GO:0003824 catalytic activity; GO:0005488 binding; GO:0043167 ion binding;	--	--	T	Serine/threonine protein phosphatase
F01_cb3253_c1/f1p0/2619	hypothetical protein AMTR_s00096p00019400 [Amborella trichopoda]	0.373	Down	0.032077	0.401	Down	0.00032097	0.657	--	0.29194	0.611	--	0.084897	--	--	GO:0005515 protein binding; GO:0005488 binding;	--	--	R	FOG: PPR repeat
F02_cb9572_c1/f5p0/1298	PREDICTED: peroxidase 44 [Prunus mume]	3.119	Up	0.0094635	2.085	Up	0.0081622	0.139	Down	0.00068117	0.209	Down	0.00146192	GO:0008152 metabolic process; GO:0042743 hydrogen peroxide metabolic process; GO:0006950 response to stress; GO:0072593 reactive oxygen species metabolic process; GO:0055114 oxidation-reduction process; GO:0044710 single-organism metabolic process; GO:0006979 response to oxidative stress; GO:0044699 single-organism process; GO:0044248 cellular catabolic process; GO:0050896 response to stimulus; G…	--	GO:0097159 organic cyclic compound binding; GO:1901363 heterocyclic compound binding; GO:0020037 heme binding; GO:0003824 catalytic activity; GO:0005488 binding; GO:0016209 antioxidant activity; GO:0004601 peroxidase activity; GO:0046906 tetrapyrrole binding; GO:0016491 oxidoreductase activity; GO:0016684 oxidoreductase activity, acting on peroxide as acceptor;	pda:103703770; peroxidase 72-like; K00430 peroxidase [EC:1.11.1.7] (A)	ko00940 Phenylpropanoid biosynthesis; ko00360 Phenylalanine metabolism;	--	--
F02_cb8392_c8/f1p1/2595	PREDICTED: Ras-related protein RHN1 OS=Nicotiana plumbaginifolia GN=RHN1 PE=2 SV=1	2.022	Up	0.01832	--	--	--	--	--	--	--	--	--	GO:0050794 regulation of cellular process; GO:0044700 single organism signaling; GO:0051716 cellular response to stimulus; GO:0007165 signal transduction; GO:0050789 regulation of biological process; GO:0007154 cell communication; GO:0035556 intracellular signal transduction; GO:0044699 single-organism process; GO:0007264 small GTPase mediated signal transduction; GO:0023052 signaling; GO:0050896…	--	GO:1901265 nucleoside phosphate binding; GO:0001882 nucleoside binding; GO:0043167 ion binding; GO:0000166 nucleotide binding; GO:0097159 organic cyclic compound binding; GO:1901363 heterocyclic compound binding; GO:0032549 ribonucleoside binding; GO:0097367 carbohydrate derivative binding; GO:0032553 ribonucleotide binding; GO:0005488 binding; GO:0032550 purine ribonucleoside binding; GO:0043168…	ppp:PHYPADRAFT_196247; RabF2A2; Rab5/RabF-family small GTPase; K07889 Ras-related protein Rab-5C (A)	ko04145 Phagosome; ko04144 Endocytosis;	U	GTPase Rab5/YPT51 and related small G protein superfamily GTPases
F02_cb2557_c2/f1p1/3191	"""PREDICTED: NifU-like protein 1, chloroplastic OS=Arabidopsis thaliana GN=NIFU1 PE=1 SV=1"""	0.419	Down	0.021401	0.611	--	0.2698	1.332	--	0.94064	0.914	--	0.73686	GO:0006790 sulfur compound metabolic process; GO:0044085 cellular component biogenesis; GO:0051188 cofactor biosynthetic process; GO:0016043 cellular component organization; GO:0008152 metabolic process; GO:0031163 metallo-sulfur cluster assembly; GO:0022607 cellular component assembly; GO:0016226 iron-sulfur cluster assembly; GO:0009058 biosynthetic process; GO:0009987 cellular process; GO:00442…	--	GO:0005506 iron ion binding; GO:0046914 transition metal ion binding; GO:0051536 iron-sulfur cluster binding; GO:0005488 binding; GO:0043167 ion binding; GO:0046872 metal ion binding; GO:0043169 cation binding; GO:0051540 metal cluster binding;	--	--	O	NifU-like domain-containing proteins
F02_cb7728_c0/f7p0/470	unknown [Picea sitchensis]	1.802	Up	0.0048001	--	--	--	--	--	--	--	--	--	GO:0006810 transport; GO:0051179 localization; GO:0006812 cation transport; GO:0030001 metal ion transport; GO:0006811 ion transport; GO:0051234 establishment of localization;	--	GO:0046872 metal ion binding; GO:0043169 cation binding; GO:0005488 binding; GO:0043167 ion binding;	--	--	--	--
F02_cb10870_c4/f1p0/1151	PREDICTED: Peptide methionine sulfoxide reductase A3 OS=Arabidopsis thaliana GN=MSRA3 PE=1 SV=1	0.195	Down	0.0066647	0.24	Down	0.00168309	1.147	--	0.62092	0.929	--	0.97368	GO:0044699 single-organism process; GO:0008152 metabolic process; GO:0055114 oxidation-reduction process; GO:0044710 single-organism metabolic process;	--	GO:0016667 oxidoreductase activity, acting on a sulfur group of donors; GO:0008113 peptide-methionine (S)-S-oxide reductase activity; GO:0016671 oxidoreductase activity, acting on a sulfur group of donors, disulfide as acceptor; GO:0003824 catalytic activity; GO:0016491 oxidoreductase activity;	--	--	O	Peptide methionine sulfoxide reductase
F02_cb9713_c10/f3p0/790	unknown [Picea sitchensis]	1.903	Up	0.023916	2.338	Up	0.0039995	0.971	--	0.84436	0.791	--	0.26412	--	--	--	--	--	G	Glyoxalase
F01_cb13436_c2/f1p1/663	unknown [Picea sitchensis]	3.201	Up	0.0136377	--	--	--	--	--	--	--	--	--	--	GO:0043226 organelle; GO:0043231 intracellular membrane-bounded organelle; GO:0043229 intracellular organelle; GO:0005783 endoplasmic reticulum; GO:0044464 cell part; GO:0005622 intracellular; GO:0005737 cytoplasm; GO:0012505 endomembrane system; GO:0044424 intracellular part; GO:0043227 membrane-bounded organelle; GO:0005623 cell; GO:0044444 cytoplasmic part;	--	--	--	S	Predicted membrane protein
F02_cb7794_c3/f1p0/1999	"""PREDICTED: D-amino-acid transaminase, chloroplastic [Vitis vinifera]"""	0.468	Down	0.045641	--	--	--	--	--	--	--	--	--	GO:0008152 metabolic process;	--	GO:0003824 catalytic activity;	vvi:100266456; D-amino-acid transaminase, chloroplastic; K18482 4-amino-4-deoxychorismate lyase [EC:4.1.3.38] (A)	ko00790 Folate biosynthesis;	E	Branched chain aminotransferase BCAT1, pyridoxal phosphate enzymes type IV superfamily
F02_cb11778_c4/f2p0/1067	unknown [Picea sitchensis]	2.675	Up	0.0119244	--	--	--	--	--	--	--	--	--	--	--	--	--	--	--	--
F01_cb14707_c0/f4p0/637	antimicrobial peptide 3 [Pinus sylvestris]	0.029	Down	0.038564	0.13	Down	0.0159569	6.245	Up	0.023181	1.417	--	0.48778	GO:0045926 negative regulation of growth; GO:0050789 regulation of biological process; GO:0040008 regulation of growth; GO:0006950 response to stress; GO:0048519 negative regulation of biological process; GO:0006952 defense response; GO:0050896 response to stimulus; GO:0065007 biological regulation;	--	--	--	--	--	--
F01_cb10782_c13/f2p2/1053	"""PREDICTED: Thioredoxin F2, chloroplastic OS=Arabidopsis thaliana GN=At5g16400 PE=2 SV=1"""	1.339	Up	0.0049951	1.143	--	0.33592	1.003	--	0.99128	1.174	--	0.24314	GO:0050794 regulation of cellular process; GO:0042592 homeostatic process; GO:0065008 regulation of biological quality; GO:0050789 regulation of biological process; GO:0045454 cell redox homeostasis; GO:0044763 single-organism cellular process; GO:0019725 cellular homeostasis; GO:0044699 single-organism process; GO:0009987 cellular process; GO:0065007 biological regulation;	--	--	--	--	O	Thioredoxin
F01_cb5000_c104626/f1p0/1851	PREDICTED: Cytochrome P450 750A1 OS=Pinus taeda GN=CYP750A1 PE=2 SV=1	1.994	Up	0.0072567	--	--	--	--	--	--	--	--	--	GO:0044699 single-organism process; GO:0008152 metabolic process; GO:0055114 oxidation-reduction process; GO:0044710 single-organism metabolic process;	--	GO:0097159 organic cyclic compound binding; GO:1901363 heterocyclic compound binding; GO:0020037 heme binding; GO:0005506 iron ion binding; GO:0046914 transition metal ion binding; GO:0003824 catalytic activity; GO:0005488 binding; GO:0043167 ion binding; GO:0043169 cation binding; GO:0046872 metal ion binding; GO:0016705 oxidoreductase activity, acting on paired donors, with incorporation or red…	--	--	Q	Cytochrome P450 CYP2 subfamily
F01_cb11335_c0/f5p0/1102	PREDICTED: Ras-related protein RHN1 OS=Nicotiana plumbaginifolia GN=RHN1 PE=2 SV=1	1.824	Up	0.022224	1.727	Up	0.0036594	0.653	Down	0.0190756	0.69	--	0.089503	GO:0050794 regulation of cellular process; GO:0044700 single organism signaling; GO:0051716 cellular response to stimulus; GO:0007165 signal transduction; GO:0050789 regulation of biological process; GO:0007154 cell communication; GO:0035556 intracellular signal transduction; GO:0044699 single-organism process; GO:0007264 small GTPase mediated signal transduction; GO:0023052 signaling; GO:0050896…	--	GO:1901265 nucleoside phosphate binding; GO:0001882 nucleoside binding; GO:0043167 ion binding; GO:0000166 nucleotide binding; GO:0097159 organic cyclic compound binding; GO:1901363 heterocyclic compound binding; GO:0032549 ribonucleoside binding; GO:0097367 carbohydrate derivative binding; GO:0032553 ribonucleotide binding; GO:0005488 binding; GO:0032550 purine ribonucleoside binding; GO:0043168…	ppp:PHYPADRAFT_196247; RabF2A2; Rab5/RabF-family small GTPase; K07889 Ras-related protein Rab-5C (A)	ko04145 Phagosome; ko04144 Endocytosis;	U	GTPase Rab5/YPT51 and related small G protein superfamily GTPases
F01_cb5379_c17/f1p0/2326	PREDICTED: probable alpha-amylase 2 [Nelumbo nucifera]	0.6	Down	0.0114442	--	--	--	--	--	--	--	--	--	GO:0008152 metabolic process; GO:0005975 carbohydrate metabolic process; GO:0044238 primary metabolic process; GO:0071704 organic substance metabolic process;	--	GO:0043169 cation binding; GO:0003824 catalytic activity; GO:0005488 binding; GO:0043167 ion binding;	smo:SELMODRAFT_119619; hypothetical protein; K01176 alpha-amylase [EC:3.2.1.1] (A)	ko00500 Starch and sucrose metabolism;	G	Alpha-amylase
F01_cb13351_c10/f1p0/1258	PREDICTED: Proteasome subunit beta type-2-B OS=Arabidopsis thaliana GN=PBD2 PE=1 SV=1	1.24	Up	0.033698	1.075	--	0.63144	0.889	--	0.3401	1.026	--	0.8503	GO:0051603 proteolysis involved in cellular protein catabolic process; GO:0044265 cellular macromolecule catabolic process; GO:0044257 cellular protein catabolic process; GO:0044267 cellular protein metabolic process; GO:0044238 primary metabolic process; GO:0044237 cellular metabolic process; GO:0071704 organic substance metabolic process; GO:1901575 organic substance catabolic process; GO:00081…	GO:1902494 catalytic complex; GO:0000502 proteasome complex; GO:0044464 cell part; GO:0005622 intracellular; GO:0005839 proteasome core complex; GO:0032991 macromolecular complex; GO:0044424 intracellular part; GO:1905368 peptidase complex; GO:0005623 cell; GO:0043234 protein complex; GO:1905369 endopeptidase complex;	GO:0004175 endopeptidase activity; GO:0004298 threonine-type endopeptidase activity; GO:0008233 peptidase activity; GO:0070003 threonine-type peptidase activity; GO:0003824 catalytic activity; GO:0070011 peptidase activity, acting on L-amino acid peptides; GO:0016787 hydrolase activity;	atr:s00002p00272080; AMTR_s00002p00272080; hypothetical protein; K02734 20S proteasome subunit beta 4 [EC:3.4.25.1] (A)	ko03050 Proteasome;	O	20S proteasome, regulatory subunit beta type PSMB2/PRE1
F01_cb9821_c3/f1p0/1300	uncharacterized protein	1.786	Up	0.009104	2.254	Up	0.048342	2.107	--	0.050038	1.67	Up	0.042236	--	--	--	--	--	--	--
F02_cb13724_c0/f1p0/1771	hypothetical protein AMTR_s00021p00106490 [Amborella trichopoda]	0.684	Down	0.0161405	0.727	Down	0.0173406	0.884	--	0.23492	0.833	--	0.110599	GO:0006810 transport; GO:0006897 endocytosis; GO:0051179 localization; GO:0051234 establishment of localization; GO:0016192 vesicle-mediated transport;	GO:0016020 membrane;	--	--	--	S	Uncharacterized conserved protein
F02_cb12695_c1/f1p0/1156	PREDICTED: probable acetyltransferase NSI isoform X3 [Nelumbo nucifera]	1.35	Up	0.0155585	0.779	--	0.136995	0.827	--	0.086318	1.433	Up	0.0473	--	--	GO:0016746 transferase activity, transferring acyl groups; GO:0008080 N-acetyltransferase activity; GO:0003824 catalytic activity; GO:0016740 transferase activity; GO:0016747 transferase activity, transferring acyl groups other than amino-acyl groups; GO:0016407 acetyltransferase activity; GO:0016410 N-acyltransferase activity;	--	--	--	--
F01_cb5647_c6/f1p1/1536	glycerate oxidase [Pinus pinaster]	0.175	Down	0.0008624	0.362	Down	0.00083962	2.374	Up	0.0072435	1.144	--	0.38994	GO:0044699 single-organism process; GO:0008152 metabolic process; GO:0055114 oxidation-reduction process; GO:0044710 single-organism metabolic process;	--	GO:0097159 organic cyclic compound binding; GO:1901363 heterocyclic compound binding; GO:0097367 carbohydrate derivative binding; GO:1901265 nucleoside phosphate binding; GO:0003824 catalytic activity; GO:0032553 ribonucleotide binding; GO:0005488 binding; GO:0043167 ion binding; GO:0043168 anion binding; GO:0000166 nucleotide binding; GO:0010181 FMN binding; GO:0048037 cofactor binding; GO:00164…	pda:103705751; peroxisomal (S)-2-hydroxy-acid oxidase GLO5; K11517 (S)-2-hydroxy-acid oxidase [EC:1.1.3.15] (A)	ko04146 Peroxisome; ko00630 Glyoxylate and dicarboxylate metabolism;	C	Glycolate oxidase
F02_cb10544_c4/f2p0/1377	PREDICTED: Probable dolichyl-diphosphooligosaccharide--protein glycosyltransferase subunit 3B OS=Arabidopsis thaliana GN=OST3B PE=2 SV=1	1.684	Up	0.024376	1.278	--	0.31296	0.708	--	0.125857	0.932	--	0.71452	--	--	--	vvi:100243455; uncharacterized LOC100243455; K12669 oligosaccharyltransferase complex subunit gamma (A)	ko04141 Protein processing in endoplasmic reticulum; ko00510 N-Glycan biosynthesis;	O	Oligosaccharyltransferase, gamma subunit
F02_cb494_c57/f1p1/4449	PREDICTED: coatomer subunit alpha-1-like [Nelumbo nucifera]	1.501	Up	0.006602	0.965	--	0.77246	0.635	Down	0.0020153	0.987	--	0.88852	GO:0045184 establishment of protein localization; GO:0006810 transport; GO:0046907 intracellular transport; GO:0070727 cellular macromolecule localization; GO:0051649 establishment of localization in cell; GO:0016192 vesicle-mediated transport; GO:0006886 intracellular protein transport; GO:0071702 organic substance transport; GO:0008104 protein localization; GO:0033036 macromolecule localization…	GO:0016020 membrane; GO:0031410 cytoplasmic vesicle; GO:0031090 organelle membrane; GO:0098796 membrane protein complex; GO:0030137 COPI-coated vesicle; GO:0031982 vesicle; GO:0030660 Golgi-associated vesicle membrane; GO:0005737 cytoplasm; GO:0044433 cytoplasmic vesicle part; GO:0032991 macromolecular complex; GO:0044424 intracellular part; GO:0030120 vesicle coat; GO:0030663 COPI-coated vesicle…	GO:0005515 protein binding; GO:0005198 structural molecule activity; GO:0005488 binding;	--	--	U	Vesicle coat complex COPI, alpha subunit
F02_cb1202_c13/f1p0/3583	hypothetical protein AMTR_s00099p00047790 [Amborella trichopoda]	1.447	Up	0.049141	1.094	--	0.63692	0.895	--	0.55094	1.183	--	0.28276	GO:0046477 glycosylceramide catabolic process; GO:1903509 liposaccharide metabolic process; GO:0006643 membrane lipid metabolic process; GO:0019377 glycolipid catabolic process; GO:0006672 ceramide metabolic process; GO:0006687 glycosphingolipid metabolic process; GO:0044699 single-organism process; GO:0044255 cellular lipid metabolic process; GO:0006677 glycosylceramide metabolic process; GO:004…	GO:0016020 membrane;	GO:0004553 hydrolase activity, hydrolyzing O-glycosyl compounds; GO:0016787 hydrolase activity; GO:0003824 catalytic activity; GO:0004348 glucosylceramidase activity; GO:0016798 hydrolase activity, acting on glycosyl bonds;	atr:s00099p00047790; AMTR_s00099p00047790; hypothetical protein; K17108 non-lysosomal glucosylceramidase [EC:3.2.1.45] (A)	ko00511 Other glycan degradation; ko00600 Sphingolipid metabolism;	G	Predicted bile acid beta-glucosidase
F01_cb13363_c1/f1p0/1294	unknown [Picea sitchensis]	1.592	Up	0.0088441	1.019	--	0.93072	0.551	Down	0.045655	0.861	--	0.173276	--	--	--	--	--	--	--
F01_cb7242_c5/f2p0/2023	PREDICTED: Eukaryotic initiation factor 4A-3 OS=Nicotiana plumbaginifolia PE=2 SV=1	0.671	Down	0.0130628	0.863	--	0.198561	1.653	Up	0.0167573	1.286	Up	0.0118214	--	--	GO:0005524 ATP binding; GO:1901265 nucleoside phosphate binding; GO:0001882 nucleoside binding; GO:0043167 ion binding; GO:0000166 nucleotide binding; GO:0097159 organic cyclic compound binding; GO:1901363 heterocyclic compound binding; GO:0032549 ribonucleoside binding; GO:0097367 carbohydrate derivative binding; GO:0032553 ribonucleotide binding; GO:0005488 binding; GO:0003676 nucleic acid bind…	ppp:PHYPADRAFT_60709; hypothetical protein; K13025 ATP-dependent RNA helicase [EC:3.6.4.13] (A)	ko03040 Spliceosome; ko03015 mRNA surveillance pathway; ko03013 RNA transport;	J	Translation initiation factor 4F, helicase subunit (eIF-4A) and related helicases
F01_cb4717_c66/f1p1/2461	PREDICTED: Transmembrane 9 superfamily member 3 OS=Arabidopsis thaliana GN=TMN3 PE=2 SV=1	1.885	Up	0.043041	--	--	--	--	--	--	--	--	--	--	GO:0031224 intrinsic component of membrane; GO:0016020 membrane; GO:0016021 integral component of membrane; GO:0044425 membrane part;	--	--	--	U	Endosomal membrane proteins, EMP70
F01_cb4442_c0/f3p0/2509	PREDICTED: Serine/threonine-protein phosphatase 5 OS=Arabidopsis thaliana GN=PAPP5 PE=1 SV=1	0.612	Down	0.040637	0.967	--	0.67048	2.35	Up	0.0104752	1.486	--	0.051699	--	--	GO:0005515 protein binding; GO:0016787 hydrolase activity; GO:0003824 catalytic activity; GO:0005488 binding;	--	--	R	Serine-threonine phosphatase 2A, catalytic subunit
F01_cb7192_c16/f1p1/1986	PREDICTED: Selenium-binding protein 2 OS=Arabidopsis thaliana GN=SBP2 PE=1 SV=1	0.301	Down	0.0104379	--	--	--	--	--	--	--	--	--	--	--	GO:0005515 protein binding; GO:0008430 selenium binding; GO:0005488 binding;	--	--	P	Selenium-binding protein
F02_cb13867_c1/f3p0/1656	"""PREDICTED: Bifunctional protein FolD 4, chloroplastic OS=Arabidopsis thaliana GN=FOLD4 PE=1 SV=1"""	0.338	Down	0.036295	0.936	--	0.49396	1.497	Up	0.025096	0.541	--	0.170141	GO:0051188 cofactor biosynthetic process; GO:0042559 pteridine-containing compound biosynthetic process; GO:0006725 cellular aromatic compound metabolic process; GO:0016053 organic acid biosynthetic process; GO:0042398 cellular modified amino acid biosynthetic process; GO:0044699 single-organism process; GO:0009058 biosynthetic process; GO:1901566 organonitrogen compound biosynthetic process; GO:…	--	GO:0004488 methylenetetrahydrofolate dehydrogenase (NADP+) activity; GO:0016645 oxidoreductase activity, acting on the CH-NH group of donors; GO:0016646 oxidoreductase activity, acting on the CH-NH group of donors, NAD or NADP as acceptor; GO:0003824 catalytic activity; GO:0016491 oxidoreductase activity;	--	--	H	Methylenetetrahydrofolate dehydrogenase/methylenetetrahydrofolate cyclohydrolase
F02_cb6796_c4/f1p0/2193	unknown [Picea sitchensis]	0.807	Down	0.042399	0.82	--	0.45366	1.135	--	0.81026	1.117	--	0.60912	GO:0044085 cellular component biogenesis; GO:0016043 cellular component organization; GO:0034622 cellular macromolecular complex assembly; GO:0022613 ribonucleoprotein complex biogenesis; GO:0022618 ribonucleoprotein complex assembly; GO:0042254 ribosome biogenesis; GO:0042256 mature ribosome assembly; GO:0042255 ribosome assembly; GO:0043933 macromolecular complex subunit organization; GO:007182…	--	--	tcc:TCM_035364; Sequence-specific DNA binding transcription factors; K14574 ribosome maturation protein SDO1 (A)	ko03008 Ribosome biogenesis in eukaryotes;	R	C2H2-type Zn-finger protein
F02_cb11199_c11/f1p0/1232	"""PREDICTED: CBS domain-containing protein CBSX1, chloroplastic OS=Arabidopsis thaliana GN=CBSX1 PE=1 SV=2"""	1.385	Up	0.042317	2.266	Up	0.032061	0.891	--	0.50352	0.544	Down	0.0066406	--	--	--	--	--	--	--
F01_cb8670_c2/f1p0/1727	PREDICTED: Ras-related protein Rab2BV OS=Beta vulgaris GN=RAB2BV PE=2 SV=1	0.168	Down	0.00119558	0.177	Down	2.3912e-05	1.022	--	0.82002	0.971	--	0.96728	GO:0050794 regulation of cellular process; GO:0044700 single organism signaling; GO:0051716 cellular response to stimulus; GO:0007165 signal transduction; GO:0050789 regulation of biological process; GO:0007154 cell communication; GO:0035556 intracellular signal transduction; GO:0044699 single-organism process; GO:0007264 small GTPase mediated signal transduction; GO:0023052 signaling; GO:0050896…	--	GO:1901265 nucleoside phosphate binding; GO:0001882 nucleoside binding; GO:0043167 ion binding; GO:0000166 nucleotide binding; GO:0097159 organic cyclic compound binding; GO:1901363 heterocyclic compound binding; GO:0032549 ribonucleoside binding; GO:0097367 carbohydrate derivative binding; GO:0032553 ribonucleotide binding; GO:0005488 binding; GO:0032550 purine ribonucleoside binding; GO:0043168…	cam:101498836; ras-related protein RABA5a-like; K07904 Ras-related protein Rab-11A (A)	ko04144 Endocytosis;	U	GTPase Rab11/YPT3, small G protein superfamily
F02_cb5642_c26/f1p0/2208	PREDICTED: Plastidic glucose transporter 4 OS=Arabidopsis thaliana GN=At5g16150 PE=1 SV=2	2.509	Up	0.0024209	1.959	Up	0.0159418	0.729	--	0.121524	0.934	--	0.67004	GO:0006810 transport; GO:0055085 transmembrane transport; GO:0051179 localization; GO:0051234 establishment of localization;	GO:0031224 intrinsic component of membrane; GO:0016020 membrane; GO:0016021 integral component of membrane; GO:0044425 membrane part;	GO:0022892 substrate-specific transporter activity; GO:0022891 substrate-specific transmembrane transporter activity; GO:0022857 transmembrane transporter activity; GO:0005215 transporter activity;	--	--	R	Predicted transporter (major facilitator superfamily)
F02_cb12661_c0/f2p0/1627	PREDICTED: peroxidase 17 [Nicotiana sylvestris]	2.256	Up	0.039783	0.752	--	0.076344	0.05	Down	1.99871e-05	0.149	Down	0.0033805	GO:0008152 metabolic process; GO:0042743 hydrogen peroxide metabolic process; GO:0006950 response to stress; GO:0072593 reactive oxygen species metabolic process; GO:0055114 oxidation-reduction process; GO:0044710 single-organism metabolic process; GO:0006979 response to oxidative stress; GO:0044699 single-organism process; GO:0044248 cellular catabolic process; GO:0050896 response to stimulus; G…	--	GO:0097159 organic cyclic compound binding; GO:1901363 heterocyclic compound binding; GO:0020037 heme binding; GO:0003824 catalytic activity; GO:0005488 binding; GO:0016209 antioxidant activity; GO:0004601 peroxidase activity; GO:0046906 tetrapyrrole binding; GO:0016491 oxidoreductase activity; GO:0016684 oxidoreductase activity, acting on peroxide as acceptor;	pda:103703770; peroxidase 72-like; K00430 peroxidase [EC:1.11.1.7] (A)	ko00940 Phenylpropanoid biosynthesis; ko00360 Phenylalanine metabolism;	--	--
F02_cb173_c60/f1p0/6447	PREDICTED: callose synthase 3 [Nelumbo nucifera]	1.627	Up	0.0131639	1.4	--	0.059403	1.081	--	0.51656	1.256	--	0.159555	GO:0016051 carbohydrate biosynthetic process; GO:0006074 (1->3)-beta-D-glucan metabolic process; GO:0044711 single-organism biosynthetic process; GO:0006073 cellular glucan metabolic process; GO:0000271 polysaccharide biosynthetic process; GO:0044042 glucan metabolic process; GO:0044763 single-organism cellular process; GO:0044699 single-organism process; GO:0033692 cellular polysaccharide biosyn…	GO:0016020 membrane; GO:1902494 catalytic complex; GO:0044459 plasma membrane part; GO:0044425 membrane part; GO:0044464 cell part; GO:0071944 cell periphery; GO:0032991 macromolecular complex; GO:1990234 transferase complex; GO:0005623 cell; GO:0000148 1,3-beta-D-glucan synthase complex; GO:0005886 plasma membrane;	GO:0016758 transferase activity, transferring hexosyl groups; GO:0003824 catalytic activity; GO:0035251 UDP-glucosyltransferase activity; GO:0008194 UDP-glycosyltransferase activity; GO:0046527 glucosyltransferase activity; GO:0016757 transferase activity, transferring glycosyl groups; GO:0003843 1,3-beta-D-glucan synthase activity; GO:0016740 transferase activity;	--	--	M	1,3-beta-glucan synthase/callose synthase catalytic subunit
F02_cb6417_c15/f1p1/2515	PREDICTED: Bifunctional nitrilase/nitrile hydratase NIT4A OS=Lupinus angustifolius GN=NIT4A PE=1 SV=1	2.261	Up	0.0059372	--	--	--	--	--	--	--	--	--	GO:0006807 nitrogen compound metabolic process; GO:0008152 metabolic process;	--	GO:0016787 hydrolase activity; GO:0003824 catalytic activity; GO:0016810 hydrolase activity, acting on carbon-nitrogen (but not peptide) bonds;	cam:101500877; bifunctional nitrilase/nitrile hydratase NIT4B-like; K13035 beta-cyano-L-alanine hydratase/nitrilase [EC:3.5.5.4 4.2.1.65] (A)	ko00460 Cyanoamino acid metabolism;	E	Carbon-nitrogen hydrolase
F02_cb1484_c29/f1p0/2866	"""PREDICTED: Granule-bound starch synthase 2, chloroplastic/amyloplastic OS=Solanum tuberosum GN=SS2 PE=1 SV=3"""	0.62	Down	0.0043205	0.637	Down	0.0111191	0.848	--	0.20782	0.825	Down	0.043904	--	--	GO:0016758 transferase activity, transferring hexosyl groups; GO:0003824 catalytic activity; GO:0035251 UDP-glucosyltransferase activity; GO:0008194 UDP-glycosyltransferase activity; GO:0046527 glucosyltransferase activity; GO:0004373 glycogen (starch) synthase activity; GO:0016757 transferase activity, transferring glycosyl groups; GO:0016740 transferase activity;	vvi:100233071; starch synthase VI; K00703 starch synthase [EC:2.4.1.21] (A)	ko00500 Starch and sucrose metabolism;	--	--
F02_cb14364_c0/f1p0/1038	predicted protein [Physcomitrella patens]	2.283	Up	0.00141696	--	--	--	--	--	--	--	--	--	--	--	--	--	--	--	--
F02_cb2973_c3/f1p1/2878	hypothetical protein AMTR_s00129p00085100 [Amborella trichopoda]	1.657	Up	0.034962	--	--	--	--	--	--	--	--	--	--	--	--	--	--	U	Subunit of cis-Golgi transport vesicle tethering complex - Sec34p
F01_cb12370_c3/f1p0/1013	hypothetical protein PRUPE_ppa013303mg [Prunus persica]	1.629	Up	0.0073226	1.343	--	0.27954	0.681	--	0.12418	0.825	--	0.067759	GO:0098655 cation transmembrane transport; GO:0034220 ion transmembrane transport; GO:0098660 inorganic ion transmembrane transport; GO:0090662 ATP hydrolysis coupled transmembrane transport; GO:0015988 energy coupled proton transmembrane transport, against electrochemical gradient; GO:0044699 single-organism process; GO:0006818 hydrogen transport; GO:0015992 proton transport; GO:0051234 establis…	GO:0032991 macromolecular complex; GO:0016020 membrane; GO:0033178 proton-transporting two-sector ATPase complex, catalytic domain; GO:0033176 proton-transporting V-type ATPase complex; GO:0043234 protein complex; GO:0098796 membrane protein complex; GO:0044425 membrane part; GO:0016469 proton-transporting two-sector ATPase complex; GO:0033180 proton-transporting V-type ATPase, V1 domain;	GO:0022804 active transmembrane transporter activity; GO:0042625 ATPase coupled ion transmembrane transporter activity; GO:0015075 ion transmembrane transporter activity; GO:0022853 active ion transmembrane transporter activity; GO:0015399 primary active transmembrane transporter activity; GO:0022892 substrate-specific transporter activity; GO:0044769 ATPase activity, coupled to transmembrane mov…	pper:PRUPE_ppa013303mg; hypothetical protein; K02151 V-type H+-transporting ATPase subunit F (A)	ko04145 Phagosome; ko00190 Oxidative phosphorylation;	C	Vacuolar H+-ATPase V1 sector, subunit F
F02_cb8086_c11/f4p0/1942	unknown [Picea sitchensis]	0.433	Down	0.039303	0.695	Down	6.1377e-05	2.765	Up	0.0110428	1.722	--	0.131921	GO:0006790 sulfur compound metabolic process; GO:0008152 metabolic process; GO:0006793 phosphorus metabolic process; GO:0035383 thioester metabolic process; GO:0006732 coenzyme metabolic process; GO:0044237 cellular metabolic process; GO:0009987 cellular process; GO:0006637 acyl-CoA metabolic process; GO:0051186 cofactor metabolic process; GO:0071704 organic substance metabolic process;	--	GO:0047617 acyl-CoA hydrolase activity; GO:0016787 hydrolase activity; GO:0016289 CoA hydrolase activity; GO:0016790 thiolester hydrolase activity; GO:0003824 catalytic activity; GO:0016788 hydrolase activity, acting on ester bonds;	atr:s00009p00247290; AMTR_s00009p00247290; hypothetical protein; K01068 acyl-coenzyme A thioesterase 1/2/4 [EC:3.1.2.2] (A)	ko00062 Fatty acid elongation; ko01040 Biosynthesis of unsaturated fatty acids;	I	Acyl-CoA thioesterase
F02_cb78_c50/f1p0/4299	RecName: Full=Phytochrome [Pinus sylvestris]	0.746	Down	0.028479	0.626	--	0.056604	1.216	--	0.20698	1.448	--	0.072619	GO:0050794 regulation of cellular process; GO:0044700 single organism signaling; GO:0009581 detection of external stimulus; GO:0009628 response to abiotic stimulus; GO:0060255 regulation of macromolecule metabolic process; GO:0019219 regulation of nucleobase-containing compound metabolic process; GO:0044267 cellular protein metabolic process; GO:0017006 protein-tetrapyrrole linkage; GO:0044699 si…	--	GO:0038023 signaling receptor activity; GO:0016773 phosphotransferase activity, alcohol group as acceptor; GO:0004673 protein histidine kinase activity; GO:0046983 protein dimerization activity; GO:0005515 protein binding; GO:0004672 protein kinase activity; GO:0016775 phosphotransferase activity, nitrogenous group as acceptor; GO:0004871 signal transducer activity; GO:0009881 photoreceptor activ…	smo:SELMODRAFT_161430; PHYB; hypothetical protein; K12121 phytochrome B (A)	ko04712 Circadian rhythm - plant;	T	Sensory transduction histidine kinase
F01_cb9134_c4/f1p0/2307	unknown [Picea sitchensis]	0.627	Down	0.024681	--	--	--	--	--	--	--	--	--	--	--	--	--	--	--	--
F02_cb10545_c4/f4p0/1282	unknown [Picea sitchensis]	0.726	Down	0.0048174	1.017	--	0.95356	2.542	Up	0.00178057	1.815	Up	0.00079813	--	--	GO:0003824 catalytic activity;	--	--	I	Soluble epoxide hydrolase
F02_cb4776_c4/f1p1/2526	"""PREDICTED: probable acyl-activating enzyme 1, peroxisomal [Populus euphratica]"""	0.495	Down	0.040762	0.715	Down	0.035658	4.342	Up	0.022196	3.006	Up	0.00073793	GO:0008152 metabolic process;	--	GO:0003824 catalytic activity;	--	--	I	Acyl-CoA synthetase
F02_cb9735_c204796/f1p4/2386	predicted protein [Physcomitrella patens]	0.631	Down	0.025604	0.552	Down	0.026902	0.844	--	0.3299	0.965	--	0.85178	--	--	--	--	--	--	--
F01_cb14032_c5/f1p0/963	PREDICTED: Cytochrome b-c1 complex subunit 7-1 OS=Arabidopsis thaliana GN=QCR7-1 PE=1 SV=1	1.665	Up	0.0108807	1.146	--	0.4904	0.701	--	0.084344	1.018	--	0.84528	GO:0016310 phosphorylation; GO:0009116 nucleoside metabolic process; GO:0042278 purine nucleoside metabolic process; GO:0006725 cellular aromatic compound metabolic process; GO:0009167 purine ribonucleoside monophosphate metabolic process; GO:0042773 ATP synthesis coupled electron transport; GO:0009259 ribonucleotide metabolic process; GO:0009117 nucleotide metabolic process; GO:0044699 single-or…	GO:0016020 membrane; GO:0098800 inner mitochondrial membrane protein complex; GO:0031090 organelle membrane; GO:0098796 membrane protein complex; GO:0005737 cytoplasm; GO:0031224 intrinsic component of membrane; GO:0032991 macromolecular complex; GO:0098798 mitochondrial protein complex; GO:0044424 intracellular part; GO:0005623 cell; GO:0044455 mitochondrial membrane part; GO:0044422 organelle p…	--	brp:103850902; cytochrome b-c1 complex subunit 7-1; K00417 ubiquinol-cytochrome c reductase subunit 7 (A)	ko00190 Oxidative phosphorylation;	C	Ubiquinol cytochrome c reductase, subunit QCR7
F02_cb11424_c0/f2p0/1041	unknown [Picea sitchensis]	1.379	Up	0.048883	0.957	--	0.77952	0.665	--	0.060238	0.958	--	0.69738	--	--	--	--	--	--	--
F01_cb2201_c11/f1p3/2946	unnamed protein product [Coffea canephora]	1.487	Up	0.02738	0.782	--	0.26446	0.403	Down	0.0068003	0.767	--	0.099321	GO:0006486 protein glycosylation; GO:0043413 macromolecule glycosylation; GO:0009101 glycoprotein biosynthetic process; GO:0044763 single-organism cellular process; GO:0044267 cellular protein metabolic process; GO:0009100 glycoprotein metabolic process; GO:0044699 single-organism process; GO:0009058 biosynthetic process; GO:0044238 primary metabolic process; GO:0044237 cellular metabolic process…	GO:0016020 membrane;	GO:0016757 transferase activity, transferring glycosyl groups; GO:0016758 transferase activity, transferring hexosyl groups; GO:0003824 catalytic activity; GO:0016740 transferase activity; GO:0004576 oligosaccharyl transferase activity;	atr:s00029p00078080; AMTR_s00029p00078080; hypothetical protein; K07151 dolichyl-diphosphooligosaccharide--protein glycosyltransferase [EC:2.4.99.18] (A)	ko04141 Protein processing in endoplasmic reticulum; ko00510 N-Glycan biosynthesis;	O	Oligosaccharyltransferase, STT3 subunit
F02_cb10080_c12/f2p0/863	PREDICTED: Probable carboxylesterase 15 OS=Arabidopsis thaliana GN=CXE15 PE=2 SV=1	2.18	Up	0.0150432	7.019	Up	0.00022179	12.795	Up	0.000100077	3.974	Up	0.00169613	GO:0008152 metabolic process;	--	GO:0016787 hydrolase activity; GO:0003824 catalytic activity;	--	--	V	Arylacetamide deacetylase
F02_cb7870_c7/f1p0/1865	PREDICTED: Probable prolyl 4-hydroxylase 3 OS=Arabidopsis thaliana GN=P4H3 PE=2 SV=1	1.756	Up	0.0142597	1.335	--	0.078199	0.656	Down	0.0139772	0.862	--	0.41746	GO:0044699 single-organism process; GO:0008152 metabolic process; GO:0055114 oxidation-reduction process; GO:0044710 single-organism metabolic process;	--	GO:0019842 vitamin binding; GO:0005506 iron ion binding; GO:0031418 L-ascorbic acid binding; GO:0043167 ion binding; GO:0043177 organic acid binding; GO:0016705 oxidoreductase activity, acting on paired donors, with incorporation or reduction of molecular oxygen; GO:0048029 monosaccharide binding; GO:0016491 oxidoreductase activity; GO:0031406 carboxylic acid binding; GO:0046914 transition metal …	atr:s00001p00155640; AMTR_s00001p00155640; hypothetical protein; K00472 prolyl 4-hydroxylase [EC:1.14.11.2] (A)	ko00330 Arginine and proline metabolism;	E	Prolyl 4-hydroxylase alpha subunit
F01_cb5675_c13/f1p0/1974	hypothetical protein AMTR_s00045p00142150 [Amborella trichopoda]	0.618	Down	0.030121	--	--	--	--	--	--	--	--	--	--	--	GO:0005524 ATP binding; GO:1901265 nucleoside phosphate binding; GO:0001882 nucleoside binding; GO:0043167 ion binding; GO:0000166 nucleotide binding; GO:0016776 phosphotransferase activity, phosphate group as acceptor; GO:0097159 organic cyclic compound binding; GO:1901363 heterocyclic compound binding; GO:0032549 ribonucleoside binding; GO:0097367 carbohydrate derivative binding; GO:0016301 kin…	atr:s00045p00142150; AMTR_s00045p00142150; hypothetical protein; K00938 phosphomevalonate kinase [EC:2.7.4.2] (A)	ko00900 Terpenoid backbone biosynthesis;	I	Phosphomevalonate kinase
F01_cb14848_c3/f1p0/1662	PREDICTED: BAG family molecular chaperone regulator 4 [Phoenix dactylifera]	0.699	Down	0.00169841	0.977	--	0.70722	1.517	Up	0.00067512	1.086	--	0.2403	--	--	GO:0005515 protein binding; GO:0051087 chaperone binding; GO:0005488 binding;	--	--	T	BCL2-associated athanogene-like proteins and related BAG family chaperone regulators
F01_cb13111_c18/f1p1/1001	PREDICTED: 40S ribosomal protein S11-1 OS=Arabidopsis thaliana GN=RPS11A PE=2 SV=1	0.499	Down	0.0063175	1.057	--	0.55972	1.76	Up	0.00192163	0.831	--	0.26496	GO:0006518 peptide metabolic process; GO:0043043 peptide biosynthetic process; GO:0044267 cellular protein metabolic process; GO:0006807 nitrogen compound metabolic process; GO:0009058 biosynthetic process; GO:0043603 cellular amide metabolic process; GO:0044238 primary metabolic process; GO:1901566 organonitrogen compound biosynthetic process; GO:1901576 organic substance biosynthetic process; G…	GO:0005840 ribosome; GO:0043226 organelle; GO:0043229 intracellular organelle; GO:0043232 intracellular non-membrane-bounded organelle; GO:0044464 cell part; GO:0005622 intracellular; GO:0005737 cytoplasm; GO:0032991 macromolecular complex; GO:0044424 intracellular part; GO:1990904 ribonucleoprotein complex; GO:0005623 cell; GO:0030529 intracellular ribonucleoprotein complex; GO:0044444 cytoplasm…	GO:0003735 structural constituent of ribosome; GO:0005198 structural molecule activity;	sita:101785313; 40S ribosomal protein S11-like; K02949 small subunit ribosomal protein S11e (A)	ko03010 Ribosome;	J	40S ribosomal protein S11
F01_cb12769_c0/f4p0/1149	PREDICTED: Probable calcium-binding protein CML27 OS=Oryza sativa subsp. japonica GN=CML27 PE=2 SV=1	0.046	Down	0.0015593	0.464	--	0.104502	5.865	Up	0.038937	0.577	--	0.10474	--	--	GO:0043169 cation binding; GO:0046872 metal ion binding; GO:0005509 calcium ion binding; GO:0005488 binding; GO:0043167 ion binding;	pda:103709704; probable calcium-binding protein CML27; K13448 calcium-binding protein CML (A)	ko04626 Plant-pathogen interaction;	T	Calmodulin and related proteins (EF-Hand superfamily)
F01_cb5855_c7/f1p1/1763	PREDICTED: Anthocyanidin 3-O-glucosyltransferase OS=Petunia hybrida GN=RT PE=2 SV=1	0.298	Down	0.03202	0.22	Down	0.00036247	1.517	Up	0.023076	2.056	--	0.086156	GO:0008152 metabolic process;	--	GO:0016757 transferase activity, transferring glycosyl groups; GO:0016758 transferase activity, transferring hexosyl groups; GO:0003824 catalytic activity; GO:0016740 transferase activity;	--	--	GC	UDP-glucuronosyl and UDP-glucosyl transferase
F01_cb5000_c114796/f1p2/1813	PREDICTED: DNA damage-repair/toleration protein DRT102 OS=Arabidopsis thaliana GN=DRT102 PE=1 SV=2	0.452	Down	0.0089046	--	--	--	--	--	--	--	--	--	GO:0008152 metabolic process; GO:0005975 carbohydrate metabolic process; GO:0044238 primary metabolic process; GO:0071704 organic substance metabolic process;	--	GO:0016853 isomerase activity; GO:0003824 catalytic activity;	--	--	--	--
F02_cb5258_c25/f5p0/2409	PREDICTED: Phosphoinositide phospholipase C 2 OS=Arabidopsis thaliana GN=PLC2 PE=1 SV=1	1.282	Up	0.026925	--	--	--	--	--	--	--	--	--	GO:0050794 regulation of cellular process; GO:0044700 single organism signaling; GO:0051716 cellular response to stimulus; GO:0035556 intracellular signal transduction; GO:0044699 single-organism process; GO:0044238 primary metabolic process; GO:0023052 signaling; GO:0050896 response to stimulus; GO:0071704 organic substance metabolic process; GO:0007165 signal transduction; GO:0008152 metabolic …	--	GO:0004435 phosphatidylinositol phospholipase C activity; GO:0003824 catalytic activity; GO:0042578 phosphoric ester hydrolase activity; GO:0005488 binding; GO:0004629 phospholipase C activity; GO:0016788 hydrolase activity, acting on ester bonds; GO:0004620 phospholipase activity; GO:0005515 protein binding; GO:0016787 hydrolase activity; GO:0008081 phosphoric diester hydrolase activity; GO:0016…	atr:s00007p00065880; AMTR_s00007p00065880; hypothetical protein; K05857 phosphatidylinositol phospholipase C, delta [EC:3.1.4.11] (A)	ko04070 Phosphatidylinositol signaling system; ko00562 Inositol phosphate metabolism;	T	Phosphoinositide-specific phospholipase C
F02_cb3637_c0/f5p1/1674	PREDICTED: Heterogeneous nuclear ribonucleoprotein 1 OS=Arabidopsis thaliana GN=RNP1 PE=1 SV=1	0.575	Down	0.021619	0.706	--	0.3236	1.24	--	0.87142	1.01	--	0.8775	--	--	GO:0097159 organic cyclic compound binding; GO:1901363 heterocyclic compound binding; GO:1901265 nucleoside phosphate binding; GO:0005488 binding; GO:0003676 nucleic acid binding; GO:0000166 nucleotide binding; GO:0036094 small molecule binding;	pper:PRUPE_ppa007179mg; hypothetical protein; K12741 heterogeneous nuclear ribonucleoprotein A1/A3 (A)	ko03040 Spliceosome;	R	FOG: RRM domain
F02_cb10725_c1/f1p0/1716	PREDICTED: CMP-sialic acid transporter 2 OS=Oryza sativa subsp. indica GN=CSTLP2 PE=3 SV=1	2.263	Up	0.0052833	--	--	--	--	--	--	--	--	--	GO:0006810 transport; GO:1902578 single-organism localization; GO:0008643 carbohydrate transport; GO:0044699 single-organism process; GO:0071702 organic substance transport; GO:0051179 localization; GO:0051234 establishment of localization; GO:0044765 single-organism transport;	GO:0043229 intracellular organelle; GO:0016020 membrane; GO:0098588 bounding membrane of organelle; GO:0031090 organelle membrane; GO:0005737 cytoplasm; GO:0044446 intracellular organelle part; GO:0000139 Golgi membrane; GO:0012505 endomembrane system; GO:0031224 intrinsic component of membrane; GO:0044424 intracellular part; GO:0005623 cell; GO:0016021 integral component of membrane; GO:0044422 …	GO:0015294 solute:cation symporter activity; GO:0022804 active transmembrane transporter activity; GO:0015291 secondary active transmembrane transporter activity; GO:0005402 cation:sugar symporter activity; GO:0015075 ion transmembrane transporter activity; GO:0051119 sugar transmembrane transporter activity; GO:0015293 symporter activity; GO:1901476 carbohydrate transporter activity; GO:0022892 …	--	--	G	Predicted UDP-galactose transporter
F02_cb8729_c1/f2p0/1198	unknown [Picea sitchensis]	33.379	Up	0.00173989	21.255	Up	0.00082101	0.39	--	0.069464	0.612	--	0.089378	--	--	--	--	--	S	Predicted membrane protein
F02_cb178_c11/f1p0/4068	PREDICTED: Phosphoenolpyruvate carboxylase 4 OS=Arabidopsis thaliana GN=PPC4 PE=2 SV=1	0.644	Down	0.0196992	0.597	Down	0.043624	0.971	--	0.83364	1.047	--	0.78622	GO:0072350 tricarboxylic acid metabolic process; GO:0055114 oxidation-reduction process; GO:0044281 small molecule metabolic process; GO:0044763 single-organism cellular process; GO:0006099 tricarboxylic acid cycle; GO:0044699 single-organism process; GO:0044238 primary metabolic process; GO:0045333 cellular respiration; GO:0044237 cellular metabolic process; GO:0071704 organic substance metaboli…	--	GO:0016831 carboxy-lyase activity; GO:0016829 lyase activity; GO:0008964 phosphoenolpyruvate carboxylase activity; GO:0003824 catalytic activity; GO:0016830 carbon-carbon lyase activity; GO:0004611 phosphoenolpyruvate carboxykinase activity;	atr:s00024p00252690; AMTR_s00024p00252690; hypothetical protein; K01595 phosphoenolpyruvate carboxylase [EC:4.1.1.31] (A)	ko01200 Carbon metabolism; ko00710 Carbon fixation in photosynthetic organisms; ko00620 Pyruvate metabolism;	--	--
F01_cb12089_c7/f1p1/1542	PREDICTED: Ras-related protein RABA5d OS=Arabidopsis thaliana GN=RABA5D PE=1 SV=1	1.513	Up	0.027595	1.118	--	0.7218	0.526	Down	0.040282	0.712	Down	0.0122237	GO:0050794 regulation of cellular process; GO:0044700 single organism signaling; GO:0051716 cellular response to stimulus; GO:0007165 signal transduction; GO:0050789 regulation of biological process; GO:0007154 cell communication; GO:0035556 intracellular signal transduction; GO:0044699 single-organism process; GO:0007264 small GTPase mediated signal transduction; GO:0023052 signaling; GO:0050896…	--	GO:1901265 nucleoside phosphate binding; GO:0001882 nucleoside binding; GO:0043167 ion binding; GO:0000166 nucleotide binding; GO:0097159 organic cyclic compound binding; GO:1901363 heterocyclic compound binding; GO:0032549 ribonucleoside binding; GO:0097367 carbohydrate derivative binding; GO:0032553 ribonucleotide binding; GO:0005488 binding; GO:0032550 purine ribonucleoside binding; GO:0043168…	cam:101498836; ras-related protein RABA5a-like; K07904 Ras-related protein Rab-11A (A)	ko04144 Endocytosis;	U	GTPase Rab11/YPT3, small G protein superfamily
F01_cb9148_c3/f6p0/483	PREDICTED: Cytochrome c oxidase subunit 5C OS=Oryza sativa subsp. japonica GN=COX5C PE=3 SV=3	2.225	Up	0.003321	1.358	--	0.191035	0.987	--	0.89046	1.617	--	0.094923	--	GO:0016020 membrane; GO:0043229 intracellular organelle; GO:0044429 mitochondrial part; GO:0031090 organelle membrane; GO:0005737 cytoplasm; GO:0044446 intracellular organelle part; GO:0031967 organelle envelope; GO:0044424 intracellular part; GO:0005623 cell; GO:0044455 mitochondrial membrane part; GO:0044422 organelle part; GO:0005739 mitochondrion; GO:0005746 mitochondrial respiratory chain; G…	--	--	--	--	--
F02_cb11460_c1/f1p0/1705	unknown [Picea sitchensis]	0.619	Down	0.0037176	--	--	--	--	--	--	--	--	--	--	--	--	gmx:547597; In2-1 protein; K00799 glutathione S-transferase [EC:2.5.1.18] (A)	ko00480 Glutathione metabolism;	--	--
F01_cb5110_c47/f1p0/1320	"""PREDICTED: Pyridoxine/pyridoxamine 5'-phosphate oxidase 1, chloroplastic OS=Arabidopsis thaliana GN=PPOX1 PE=1 SV=1"""	0.632	Down	0.0194622	--	--	--	--	--	--	--	--	--	GO:0009110 vitamin biosynthetic process; GO:0006725 cellular aromatic compound metabolic process; GO:1901615 organic hydroxy compound metabolic process; GO:0044699 single-organism process; GO:0009058 biosynthetic process; GO:1901566 organonitrogen compound biosynthetic process; GO:0072524 pyridine-containing compound metabolic process; GO:0044237 cellular metabolic process; GO:0071704 organic sub…	--	GO:0004733 pyridoxamine-phosphate oxidase activity; GO:1901265 nucleoside phosphate binding; GO:0043167 ion binding; GO:0000166 nucleotide binding; GO:0048037 cofactor binding; GO:0016491 oxidoreductase activity; GO:1901363 heterocyclic compound binding; GO:0097159 organic cyclic compound binding; GO:0097367 carbohydrate derivative binding; GO:0003824 catalytic activity; GO:0032553 ribonucleotide…	cic:CICLE_v10000790mg; hypothetical protein; K00275 pyridoxamine 5'-phosphate oxidase [EC:1.4.3.5] K17759 NAD(P)H-hydrate epimerase [EC:5.1.99.6] (A)	ko00750 Vitamin B6 metabolism;	H	Pyridoxamine-phosphate oxidase
F01_cb9825_c10/f2p1/1141	PREDICTED: Putative 4-hydroxy-4-methyl-2-oxoglutarate aldolase 2 OS=Arabidopsis thaliana GN=At5g16450 PE=1 SV=1	0.557	Down	0.042797	0.938	--	0.59418	2.257	Up	0.0040633	1.34	--	0.162278	GO:0050794 regulation of cellular process; GO:0050789 regulation of biological process; GO:0080090 regulation of primary metabolic process; GO:0060255 regulation of macromolecule metabolic process; GO:0019219 regulation of nucleobase-containing compound metabolic process; GO:0019222 regulation of metabolic process; GO:0051171 regulation of nitrogen compound metabolic process; GO:0031323 regulatio…	--	GO:0098772 molecular function regulator; GO:0030234 enzyme regulator activity; GO:0004857 enzyme inhibitor activity; GO:0008428 ribonuclease inhibitor activity;	--	--	--	--
F01_cb10689_c5/f1p0/992	PREDICTED: Peptide methionine sulfoxide reductase A5 OS=Arabidopsis thaliana GN=MSRA5 PE=2 SV=1	2.006	Up	0.030219	--	--	--	--	--	--	--	--	--	GO:0044699 single-organism process; GO:0008152 metabolic process; GO:0055114 oxidation-reduction process; GO:0044710 single-organism metabolic process;	--	GO:0016667 oxidoreductase activity, acting on a sulfur group of donors; GO:0008113 peptide-methionine (S)-S-oxide reductase activity; GO:0016671 oxidoreductase activity, acting on a sulfur group of donors, disulfide as acceptor; GO:0003824 catalytic activity; GO:0016491 oxidoreductase activity;	--	--	O	Peptide methionine sulfoxide reductase
F01_cb1487_c31/f1p0/1744	PREDICTED: Actinidain OS=Actinidia deliciosa PE=1 SV=1	0.139	Down	3.6477e-05	0.359	--	0.050197	1.135	--	0.8238	0.438	Down	0.00049912	GO:0008152 metabolic process; GO:0050790 regulation of catalytic activity; GO:0065009 regulation of molecular function; GO:0006508 proteolysis; GO:0019538 protein metabolic process; GO:0043170 macromolecule metabolic process; GO:0044238 primary metabolic process; GO:0065007 biological regulation; GO:0071704 organic substance metabolic process;	--	GO:0004175 endopeptidase activity; GO:0070011 peptidase activity, acting on L-amino acid peptides; GO:0008234 cysteine-type peptidase activity; GO:0016787 hydrolase activity; GO:0008233 peptidase activity; GO:0004197 cysteine-type endopeptidase activity; GO:0003824 catalytic activity;	--	--	O	Cysteine proteinase Cathepsin L
F02_cb9735_c47592/f2p5/2884	PREDICTED: 5-methyltetrahydropteroyltriglutamate--homocysteine methyltransferase 2 OS=Oryza sativa subsp. japonica GN=Os12g0624000 PE=2 SV=1	9.315	Up	0.0026159	12.41	Up	0.0024039	1.988	Up	0.0178969	1.492	--	0.38484	GO:0000097 sulfur amino acid biosynthetic process; GO:0016053 organic acid biosynthetic process; GO:0009066 aspartate family amino acid metabolic process; GO:0044699 single-organism process; GO:0009058 biosynthetic process; GO:1901566 organonitrogen compound biosynthetic process; GO:0044237 cellular metabolic process; GO:0000096 sulfur amino acid metabolic process; GO:0044272 sulfur compound bios…	--	GO:0042085 5-methyltetrahydropteroyltri-L-glutamate-dependent methyltransferase activity; GO:0008168 methyltransferase activity; GO:0046914 transition metal ion binding; GO:0003824 catalytic activity; GO:0005488 binding; GO:0008172 S-methyltransferase activity; GO:0043167 ion binding; GO:0016741 transferase activity, transferring one-carbon groups; GO:0046872 metal ion binding; GO:0043169 cation …	pda:103698689; 5-methyltetrahydropteroyltriglutamate--homocysteine methyltransferase 1; K00549 5-methyltetrahydropteroyltriglutamate--homocysteine methyltransferase [EC:2.1.1.14] (A)	ko00270 Cysteine and methionine metabolism; ko01230 Biosynthesis of amino acids; ko00450 Selenocompound metabolism;	E	Methionine synthase II (cobalamin-independent)
F02_cb1733_c23/f2p0/3090	Leucine-rich repeat receptor-like protein kinase [Medicago truncatula]	0.531	Down	0.04136	--	--	--	--	--	--	--	--	--	GO:0016310 phosphorylation; GO:0044267 cellular protein metabolic process; GO:0044238 primary metabolic process; GO:0044237 cellular metabolic process; GO:0006796 phosphate-containing compound metabolic process; GO:0071704 organic substance metabolic process; GO:0008152 metabolic process; GO:0006468 protein phosphorylation; GO:0006793 phosphorus metabolic process; GO:0044260 cellular macromolecul…	--	GO:0005524 ATP binding; GO:1901265 nucleoside phosphate binding; GO:0016773 phosphotransferase activity, alcohol group as acceptor; GO:0001882 nucleoside binding; GO:0043167 ion binding; GO:0004672 protein kinase activity; GO:0000166 nucleotide binding; GO:0097159 organic cyclic compound binding; GO:1901363 heterocyclic compound binding; GO:0032549 ribonucleoside binding; GO:0097367 carbohydrate …	--	--	T	Serine/threonine protein kinase
F02_cb15745_c0/f1p0/1652	PREDICTED: Protein DJ-1 homolog B OS=Arabidopsis thaliana GN=DJ1B PE=1 SV=1	0.428	Down	0.036561	--	--	--	--	--	--	--	--	--	GO:0036525 protein deglycation; GO:0008152 metabolic process; GO:0044260 cellular macromolecule metabolic process; GO:0044267 cellular protein metabolic process; GO:0006464 cellular protein modification process; GO:0030091 protein repair; GO:0043170 macromolecule metabolic process; GO:0019538 protein metabolic process; GO:0036211 protein modification process; GO:0044238 primary metabolic process;…	--	GO:0016829 lyase activity; GO:0016836 hydro-lyase activity; GO:0036524 protein deglycase activity; GO:0003824 catalytic activity; GO:0016835 carbon-oxygen lyase activity;	--	--	RV	Putative transcriptional regulator DJ-1
F01_cb8797_c2/f1p0/1616	predicted protein [Physcomitrella patens]	0.351	Down	0.0077829	0.145	Down	0.0057432	0.794	--	0.181239	1.918	--	0.075183	GO:0006725 cellular aromatic compound metabolic process; GO:0006145 purine nucleobase catabolic process; GO:0044699 single-organism process; GO:0046098 guanine metabolic process; GO:0072523 purine-containing compound catabolic process; GO:0044237 cellular metabolic process; GO:0071704 organic substance metabolic process; GO:0044270 cellular nitrogen compound catabolic process; GO:0006147 guanine …	--	GO:0008892 guanine deaminase activity; GO:0016814 hydrolase activity, acting on carbon-nitrogen (but not peptide) bonds, in cyclic amidines; GO:0046914 transition metal ion binding; GO:0003824 catalytic activity; GO:0005488 binding; GO:0043167 ion binding; GO:0043169 cation binding; GO:0019239 deaminase activity; GO:0046872 metal ion binding; GO:0016787 hydrolase activity; GO:0008270 zinc ion bin…	ppp:PHYPADRAFT_233220; hypothetical protein; K01487 guanine deaminase [EC:3.5.4.3] (A)	ko00230 Purine metabolism;	--	--
F02_cb3631_c99/f107p5/1773	PREDICTED: Aspartyl protease family protein At5g10770 OS=Arabidopsis thaliana GN=At5g10770 PE=2 SV=1	14.744	Up	5.5838e-05	1.42	--	0.086782	0.184	Down	0.00061913	1.906	Up	0.0042649	GO:0006508 proteolysis; GO:0008152 metabolic process; GO:0043170 macromolecule metabolic process; GO:0019538 protein metabolic process; GO:0044238 primary metabolic process; GO:0071704 organic substance metabolic process;	--	GO:0004175 endopeptidase activity; GO:0008233 peptidase activity; GO:0003824 catalytic activity; GO:0004190 aspartic-type endopeptidase activity; GO:0070011 peptidase activity, acting on L-amino acid peptides; GO:0016787 hydrolase activity; GO:0070001 aspartic-type peptidase activity;	--	--	O	Aspartyl protease
F01_cb5559_c16/f3p1/1293	PREDICTED: Purple acid phosphatase 4 OS=Arabidopsis thaliana GN=PAP4 PE=2 SV=1	2.55	Up	0.00139848	1.188	--	0.51398	0.325	Down	0.0034977	0.698	--	0.114381	--	--	GO:0016787 hydrolase activity; GO:0003993 acid phosphatase activity; GO:0042578 phosphoric ester hydrolase activity; GO:0003824 catalytic activity; GO:0016791 phosphatase activity; GO:0016788 hydrolase activity, acting on ester bonds;	--	--	O	Purple (tartrate-resistant) acid phosphatase
F01_cb14324_c1/f1p0/1248	"""PREDICTED: prohibitin-3, mitochondrial [Vitis vinifera]"""	1.818	Up	0.0199031	1.342	--	0.160878	0.566	Down	0.0185008	0.767	--	0.23106	--	GO:0016020 membrane;	--	--	--	O	Prohibitin
F01_cb8828_c13/f1p0/665	PREDICTED: Ubiquitin-conjugating enzyme E2 30 OS=Arabidopsis thaliana GN=UBC30 PE=1 SV=1	0.51	Down	0.035682	0.901	--	0.30674	2.117	Up	0.021924	1.197	--	0.174758	--	--	--	atr:s00089p00096280; AMTR_s00089p00096280; hypothetical protein; K06689 ubiquitin-conjugating enzyme E2 D/E [EC:6.3.2.19] (A)	ko04141 Protein processing in endoplasmic reticulum; ko04120 Ubiquitin mediated proteolysis;	O	Ubiquitin-protein ligase
F02_cb8539_c4/f1p1/1974	hypothetical protein AMTR_s00024p00180920 [Amborella trichopoda]	6.821	Up	0.00031804	12.224	Up	0.00068199	1.18	--	0.21404	0.659	--	0.20306	--	--	--	--	--	--	--
F02_cb8037_c1/f4p1/1892	"""PREDICTED: Glutamate-1-semialdehyde 2,1-aminomutase, chloroplastic OS=Oryza sativa subsp. japonica GN=GSA PE=2 SV=1"""	0.651	Down	0.0129395	--	--	--	--	--	--	--	--	--	GO:0018130 heterocycle biosynthetic process; GO:0006725 cellular aromatic compound metabolic process; GO:0006807 nitrogen compound metabolic process; GO:1901360 organic cyclic compound metabolic process; GO:0009058 biosynthetic process; GO:1901566 organonitrogen compound biosynthetic process; GO:1901576 organic substance biosynthetic process; GO:0044237 cellular metabolic process; GO:0044249 cell…	--	GO:0097159 organic cyclic compound binding; GO:1901363 heterocyclic compound binding; GO:0016769 transferase activity, transferring nitrogenous groups; GO:0016853 isomerase activity; GO:0042286 glutamate-1-semialdehyde 2,1-aminomutase activity; GO:0003824 catalytic activity; GO:0005488 binding; GO:0043167 ion binding; GO:0043168 anion binding; GO:0008483 transaminase activity; GO:0016869 intramol…	osa:4346136; Os08g0532200; K01845 glutamate-1-semialdehyde 2,1-aminomutase [EC:5.4.3.8] (A)	ko00860 Porphyrin and chlorophyll metabolism;	E	Acetylornithine aminotransferase
F01_cb4692_c4/f1p0/2268	hypothetical protein JCGZ_10776 [Jatropha curcas]	1.278	Up	0.0199612	--	--	--	--	--	--	--	--	--	GO:0045184 establishment of protein localization; GO:0006810 transport; GO:0046907 intracellular transport; GO:0070727 cellular macromolecule localization; GO:0051649 establishment of localization in cell; GO:0016192 vesicle-mediated transport; GO:0006886 intracellular protein transport; GO:0071702 organic substance transport; GO:0008104 protein localization; GO:0033036 macromolecule localization…	GO:0016020 membrane; GO:0044464 cell part; GO:0005622 intracellular; GO:0098796 membrane protein complex; GO:0044425 membrane part; GO:0048475 coated membrane; GO:0005737 cytoplasm; GO:0032991 macromolecular complex; GO:0044424 intracellular part; GO:0030117 membrane coat; GO:0005623 cell; GO:0043234 protein complex; GO:0044444 cytoplasmic part;	GO:0022892 substrate-specific transporter activity; GO:0008565 protein transporter activity; GO:0005215 transporter activity;	--	--	U	Clathrin adaptor complex, small subunit
F02_cb2174_c3/f1p0/3456	"""embryo yellow protein, partial [Ginkgo biloba]"""	0.655	Down	0.035401	1.132	--	0.126058	1.572	Up	0.0024569	0.911	--	0.56648	GO:0045184 establishment of protein localization; GO:0006810 transport; GO:0046907 intracellular transport; GO:0070727 cellular macromolecule localization; GO:0051649 establishment of localization in cell; GO:0006886 intracellular protein transport; GO:0071702 organic substance transport; GO:0008104 protein localization; GO:0033036 macromolecule localization; GO:0034613 cellular protein localizat…	GO:0043229 intracellular organelle; GO:0005737 cytoplasm; GO:0044446 intracellular organelle part; GO:0012505 endomembrane system; GO:0032991 macromolecular complex; GO:0044424 intracellular part; GO:0005623 cell; GO:0044422 organelle part; GO:0043231 intracellular membrane-bounded organelle; GO:0043226 organelle; GO:0044464 cell part; GO:0005622 intracellular; GO:0044431 Golgi apparatus part; GO…	--	--	--	S	Uncharacterized conserved protein
F02_cb6027_c26/f1p0/1392	PREDICTED: Sugar carrier protein C OS=Ricinus communis GN=STC PE=2 SV=1	1.773	Up	0.00065647	1.622	Up	0.043363	0.612	Down	0.00055642	0.669	--	0.074299	GO:0006810 transport; GO:0055085 transmembrane transport; GO:0051179 localization; GO:0051234 establishment of localization;	GO:0031224 intrinsic component of membrane; GO:0016020 membrane; GO:0016021 integral component of membrane; GO:0044425 membrane part;	GO:0022892 substrate-specific transporter activity; GO:0022891 substrate-specific transmembrane transporter activity; GO:0022857 transmembrane transporter activity; GO:0005215 transporter activity;	--	--	R	Predicted transporter (major facilitator superfamily)
F02_cb12812_c6/f1p0/904	PREDICTED: Uncharacterized protein At5g01610 OS=Arabidopsis thaliana GN=At5g01610 PE=1 SV=1	2.196	Up	0.03894	1.797	--	0.058485	0.501	Down	0.045318	0.612	--	0.130704	--	--	--	--	--	--	--
F01_cb11950_c17/f1p0/1364	PREDICTED: Probable carboxylesterase 15 OS=Arabidopsis thaliana GN=CXE15 PE=2 SV=1	1.502	Up	0.0119185	--	--	--	--	--	--	--	--	--	GO:0008152 metabolic process;	--	GO:0016787 hydrolase activity; GO:0003824 catalytic activity;	--	--	V	Arylacetamide deacetylase
F01_cb13729_c9/f1p0/1632	hypothetical protein AMTR_s00024p00180920 [Amborella trichopoda]	0.152	Down	0.00114249	0.424	Down	0.00022382	2.683	Up	0.00052321	0.96	--	0.99288	--	--	--	--	--	--	--
F02_cb1703_c24/f1p0/2530	PREDICTED: pentatricopeptide repeat-containing protein At2g13600 [Elaeis guineensis]	0.229	Down	0.0047621	--	--	--	--	--	--	--	--	--	--	--	GO:0005515 protein binding; GO:0005488 binding;	--	--	R	FOG: PPR repeat
F01_cb2285_c26/f3p3/2265	PREDICTED: formate--tetrahydrofolate ligase [Prunus mume]	0.549	Down	0.0050191	0.973	--	0.8713	2.308	Up	0.00038176	1.303	--	0.12306	GO:0051188 cofactor biosynthetic process; GO:0042559 pteridine-containing compound biosynthetic process; GO:0006725 cellular aromatic compound metabolic process; GO:0016053 organic acid biosynthetic process; GO:0042398 cellular modified amino acid biosynthetic process; GO:0044699 single-organism process; GO:0009058 biosynthetic process; GO:1901566 organonitrogen compound biosynthetic process; GO:…	--	GO:0005524 ATP binding; GO:1901265 nucleoside phosphate binding; GO:0016874 ligase activity; GO:0001882 nucleoside binding; GO:0043167 ion binding; GO:0000166 nucleotide binding; GO:0016879 ligase activity, forming carbon-nitrogen bonds; GO:0097159 organic cyclic compound binding; GO:1901363 heterocyclic compound binding; GO:0032549 ribonucleoside binding; GO:0097367 carbohydrate derivative bindi…	pmum:103327220; formate--tetrahydrofolate ligase; K01938 formate--tetrahydrofolate ligase [EC:6.3.4.3] (A)	ko01200 Carbon metabolism; ko00670 One carbon pool by folate;	H	C1-tetrahydrofolate synthase
F01_cb8764_c21/f1p1/1253	PREDICTED: 40S ribosomal protein S3a-like [Nelumbo nucifera]	0.56	Down	0.048643	0.477	--	0.0698	0.858	--	0.5587	1.008	--	0.92526	GO:0006518 peptide metabolic process; GO:0043043 peptide biosynthetic process; GO:0044267 cellular protein metabolic process; GO:0006807 nitrogen compound metabolic process; GO:0009058 biosynthetic process; GO:0043603 cellular amide metabolic process; GO:0044238 primary metabolic process; GO:1901566 organonitrogen compound biosynthetic process; GO:1901576 organic substance biosynthetic process; G…	GO:0005840 ribosome; GO:0043226 organelle; GO:0043229 intracellular organelle; GO:0043232 intracellular non-membrane-bounded organelle; GO:0044464 cell part; GO:0005622 intracellular; GO:0005737 cytoplasm; GO:0032991 macromolecular complex; GO:0044424 intracellular part; GO:1990904 ribonucleoprotein complex; GO:0005623 cell; GO:0030529 intracellular ribonucleoprotein complex; GO:0044444 cytoplasm…	GO:0003735 structural constituent of ribosome; GO:0005198 structural molecule activity;	atr:s00026p00042160; AMTR_s00026p00042160; hypothetical protein; K02984 small subunit ribosomal protein S3Ae (A)	ko03010 Ribosome;	J	40S ribosomal protein S3A
F01_cb14059_c3/f1p0/538	PREDICTED: Protein GAST1 OS=Solanum lycopersicum GN=GAST1 PE=2 SV=1	2.785	Up	0.0092214	--	--	--	--	--	--	--	--	--	--	--	--	--	--	--	--
F02_cb12977_c1/f1p1/789	"""PREDICTED: Acyl carrier protein 1, mitochondrial OS=Arabidopsis thaliana GN=MTACP1 PE=2 SV=1"""	0.666	Down	0.0178986	0.728	--	0.115439	1.09	--	0.68478	0.997	--	0.99118	GO:0044711 single-organism biosynthetic process; GO:0016053 organic acid biosynthetic process; GO:0044281 small molecule metabolic process; GO:0044763 single-organism cellular process; GO:0044699 single-organism process; GO:0009058 biosynthetic process; GO:0044255 cellular lipid metabolic process; GO:0006631 fatty acid metabolic process; GO:0044238 primary metabolic process; GO:0044237 cellular m…	--	--	cit:102611885; acyl carrier protein 2, mitochondrial-like; K03955 NADH dehydrogenase (ubiquinone) 1 alpha/beta subcomplex 1 (A)	ko00190 Oxidative phosphorylation;	CIQ	Acyl carrier protein/NADH-ubiquinone oxidoreductase, NDUFAB1/SDAP subunit
F01_cb13645_c6/f2p0/736	PREDICTED: Cytochrome b-c1 complex subunit 9 OS=Solanum tuberosum PE=1 SV=1	1.472	Up	0.026037	--	--	--	--	--	--	--	--	--	GO:0016310 phosphorylation; GO:0009116 nucleoside metabolic process; GO:0042278 purine nucleoside metabolic process; GO:0006725 cellular aromatic compound metabolic process; GO:0009167 purine ribonucleoside monophosphate metabolic process; GO:0042773 ATP synthesis coupled electron transport; GO:0009259 ribonucleotide metabolic process; GO:0009117 nucleotide metabolic process; GO:0044699 single-or…	GO:0016020 membrane; GO:0098800 inner mitochondrial membrane protein complex; GO:0031090 organelle membrane; GO:0098796 membrane protein complex; GO:0005737 cytoplasm; GO:0031224 intrinsic component of membrane; GO:0032991 macromolecular complex; GO:0098798 mitochondrial protein complex; GO:0044424 intracellular part; GO:0005623 cell; GO:0044455 mitochondrial membrane part; GO:0044422 organelle p…	--	pxb:103929460; cytochrome b-c1 complex subunit 9-like; K00419 ubiquinol-cytochrome c reductase subunit 9 (A)	ko00190 Oxidative phosphorylation;	C	Ubiquinol cytochrome c oxidoreductase, subunit QCR9
F01_cb11062_c1/f1p0/1259	carboxylesterase ester hydrolase [Pinus massoniana]	1.363	Up	0.049061	1.665	Up	0.039164	1.88	Up	0.0133569	1.539	Up	0.036463	--	--	GO:0016787 hydrolase activity; GO:0003824 catalytic activity; GO:0016788 hydrolase activity, acting on ester bonds;	--	--	I	Isoamyl acetate-hydrolyzing esterase
F01_cb5000_c222301/f1p0/2540	PREDICTED: heat shock protein 83-like [Pyrus x bretschneideri]	1.892	Up	0.0062788	0.76	--	0.22828	0.752	--	0.136722	1.873	Up	0.0187433	GO:0006457 protein folding; GO:0006950 response to stress; GO:0050896 response to stimulus; GO:0009987 cellular process;	--	GO:0005524 ATP binding; GO:1901265 nucleoside phosphate binding; GO:0001882 nucleoside binding; GO:0043167 ion binding; GO:0005515 protein binding; GO:0000166 nucleotide binding; GO:0097159 organic cyclic compound binding; GO:1901363 heterocyclic compound binding; GO:0032549 ribonucleoside binding; GO:0097367 carbohydrate derivative binding; GO:0032553 ribonucleotide binding; GO:0005488 binding; …	pda:103715800; heat shock protein 83; K04079 molecular chaperone HtpG (A)	ko04141 Protein processing in endoplasmic reticulum; ko04626 Plant-pathogen interaction;	O	Molecular chaperone (HSP90 family)
F01_cb388_c22/f1p1/3640	PREDICTED: villin-2 [Nelumbo nucifera]	0.645	Down	0.027901	0.607	--	0.120281	0.874	--	0.485	0.93	--	0.67736	GO:0016043 cellular component organization; GO:0007010 cytoskeleton organization; GO:0009987 cellular process; GO:0006996 organelle organization; GO:0071840 cellular component organization or biogenesis;	--	GO:0003779 actin binding; GO:0005515 protein binding; GO:0008092 cytoskeletal protein binding; GO:0005488 binding;	--	--	Z	Actin regulatory proteins (gelsolin/villin family)
F02_cb12277_c6/f1p0/1700	PREDICTED: prolyl 4-hydroxylase subunit alpha-1 isoform X1 [Prunus mume]	1.624	Up	0.031896	--	--	--	--	--	--	--	--	--	GO:0044699 single-organism process; GO:0008152 metabolic process; GO:0055114 oxidation-reduction process; GO:0044710 single-organism metabolic process;	--	GO:0019842 vitamin binding; GO:0005506 iron ion binding; GO:0031418 L-ascorbic acid binding; GO:0043167 ion binding; GO:0043177 organic acid binding; GO:0016705 oxidoreductase activity, acting on paired donors, with incorporation or reduction of molecular oxygen; GO:0048029 monosaccharide binding; GO:0016491 oxidoreductase activity; GO:0031406 carboxylic acid binding; GO:0046914 transition metal …	atr:s00001p00155640; AMTR_s00001p00155640; hypothetical protein; K00472 prolyl 4-hydroxylase [EC:1.14.11.2] (A)	ko00330 Arginine and proline metabolism;	E	Prolyl 4-hydroxylase alpha subunit
F01_cb12231_c1/f1p0/1120	PREDICTED: uncharacterized protein LOC105034963 isoform X5 [Elaeis guineensis]	0.675	Down	0.033622	--	--	--	--	--	--	--	--	--	--	--	--	--	--	--	--
F02_cb1686_c13/f1p0/3258	hypothetical protein AMTR_s00078p00105470 [Amborella trichopoda]	0.556	Down	0.024637	--	--	--	--	--	--	--	--	--	GO:0008152 metabolic process; GO:0005975 carbohydrate metabolic process; GO:0044238 primary metabolic process; GO:0071704 organic substance metabolic process;	--	GO:0004556 alpha-amylase activity; GO:0016160 amylase activity; GO:0003824 catalytic activity; GO:0005488 binding; GO:0016798 hydrolase activity, acting on glycosyl bonds; GO:0043167 ion binding; GO:0046872 metal ion binding; GO:0043169 cation binding; GO:0004553 hydrolase activity, hydrolyzing O-glycosyl compounds; GO:0016787 hydrolase activity; GO:0005509 calcium ion binding;	--	--	G	Alpha-amylase
F01_cb4897_c8/f1p0/2032	"""PREDICTED: probable acyl-activating enzyme 1, peroxisomal [Malus domestica]"""	0.513	Down	0.02426	0.812	--	0.139662	1.82	Up	0.0123222	1.151	--	0.38854	GO:0008152 metabolic process;	--	GO:0003824 catalytic activity;	--	--	I	Acyl-CoA synthetase
F01_cb500_c5/f1p0/1711	hypothetical protein AMTR_s00142p00090900 [Amborella trichopoda]	1.526	Up	0.047756	0.966	--	0.75932	0.492	Down	0.040337	0.777	Down	0.040357	--	--	--	--	--	--	--
F01_cb8546_c4/f1p0/1737	PREDICTED: Probable dolichyl-diphosphooligosaccharide--protein glycosyltransferase subunit 3B OS=Arabidopsis thaliana GN=OST3B PE=2 SV=1	1.503	Up	0.024837	1.207	--	0.33004	0.706	--	0.100701	0.879	--	0.28382	--	--	--	vvi:100243455; uncharacterized LOC100243455; K12669 oligosaccharyltransferase complex subunit gamma (A)	ko04141 Protein processing in endoplasmic reticulum; ko00510 N-Glycan biosynthesis;	O	Oligosaccharyltransferase, gamma subunit
F02_cb9575_c10/f2p0/1678	"""PREDICTED: Stearoyl-[acyl-carrier-protein] 9-desaturase, chloroplastic OS=Ricinus communis PE=1 SV=1"""	1.689	Up	0.0113784	--	--	--	--	--	--	--	--	--	GO:0044711 single-organism biosynthetic process; GO:0016053 organic acid biosynthetic process; GO:0055114 oxidation-reduction process; GO:0044281 small molecule metabolic process; GO:0044763 single-organism cellular process; GO:0044699 single-organism process; GO:0009058 biosynthetic process; GO:0044255 cellular lipid metabolic process; GO:0006631 fatty acid metabolic process; GO:0044238 primary …	--	GO:0016705 oxidoreductase activity, acting on paired donors, with incorporation or reduction of molecular oxygen; GO:0045300 acyl-[acyl-carrier-protein] desaturase activity; GO:0003824 catalytic activity; GO:0016491 oxidoreductase activity; GO:0016717 oxidoreductase activity, acting on paired donors, with oxidation of a pair of donors resulting in the reduction of molecular oxygen to two molecule…	rcu:RCOM_1238330; Stearoy-ACP desaturase (EC:1.14.19.2); K03921 acyl-[acyl-carrier-protein] desaturase [EC:1.14.19.2] (A)	ko00061 Fatty acid biosynthesis; ko01212 Fatty acid metabolism; ko01040 Biosynthesis of unsaturated fatty acids;	--	--
F01_cb6093_c40/f1p1/1991	"""PREDICTED: Serine hydroxymethyltransferase 1, mitochondrial OS=Flaveria pringlei PE=2 SV=1"""	0.141	Down	0.049703	0.232	Down	0.00122081	2.697	Up	0.0035817	1.64	--	0.2127	GO:0044281 small molecule metabolic process; GO:0044763 single-organism cellular process; GO:0006807 nitrogen compound metabolic process; GO:0044699 single-organism process; GO:0044238 primary metabolic process; GO:0006544 glycine metabolic process; GO:1901605 alpha-amino acid metabolic process; GO:0044237 cellular metabolic process; GO:0071704 organic substance metabolic process; GO:0008152 meta…	--	GO:0097159 organic cyclic compound binding; GO:1901363 heterocyclic compound binding; GO:0003824 catalytic activity; GO:0005488 binding; GO:0043167 ion binding; GO:0004372 glycine hydroxymethyltransferase activity; GO:0016741 transferase activity, transferring one-carbon groups; GO:0043168 anion binding; GO:0016742 hydroxymethyl-, formyl- and related transferase activity; GO:0048037 cofactor bind…	atr:s00046p00219150; AMTR_s00046p00219150; hypothetical protein; K00600 glycine hydroxymethyltransferase [EC:2.1.2.1] (A)	ko01200 Carbon metabolism; ko00670 One carbon pool by folate; ko01230 Biosynthesis of amino acids; ko00260 Glycine, serine and threonine metabolism; ko00460 Cyanoamino acid metabolism; ko00630 Glyoxylate and dicarboxylate metabolism;	E	Glycine/serine hydroxymethyltransferase
F01_cb12214_c1/f2p0/1216	PREDICTED: aminoacyl tRNA synthase complex-interacting multifunctional protein 1 [Musa acuminata subsp. malaccensis]	0.345	Down	0.003501	0.635	--	0.090699	2.372	Up	0.02724	1.288	--	0.114123	--	--	GO:0097159 organic cyclic compound binding; GO:1901363 heterocyclic compound binding; GO:0003723 RNA binding; GO:0000049 tRNA binding; GO:0005488 binding; GO:0003676 nucleic acid binding;	--	--	J	tRNA-binding protein
F01_cb5271_c61/f1p3/2342	hypothetical protein AMTR_s00064p00158680 [Amborella trichopoda]	2.049	Up	0.0149386	1.389	--	0.095558	0.619	Down	0.03076	0.912	--	0.7137	--	GO:0031224 intrinsic component of membrane; GO:0016020 membrane; GO:0016021 integral component of membrane; GO:0044425 membrane part;	--	--	--	U	Endosomal membrane proteins, EMP70
F02_cb8709_c1/f2p0/1443	Transducin/WD40 repeat-like superfamily protein isoform 1 [Theobroma cacao]	1.251	Up	0.0080781	--	--	--	--	--	--	--	--	--	--	--	GO:0005515 protein binding; GO:0005488 binding;	tcc:TCM_024170; Transducin/WD40 repeat-like superfamily protein isoform 1; K14320 aladin (A)	ko03013 RNA transport;	R	WD40 repeat protein
F01_cb11820_c0/f37p5/1153	PREDICTED: 40S ribosomal protein S4-3 OS=Arabidopsis thaliana GN=RPS4D PE=2 SV=2	0.218	Down	0.000139923	0.218	Down	0.00165929	1.355	--	0.22858	1.359	--	0.066676	GO:0006518 peptide metabolic process; GO:0043043 peptide biosynthetic process; GO:0044267 cellular protein metabolic process; GO:0006807 nitrogen compound metabolic process; GO:0009058 biosynthetic process; GO:0043603 cellular amide metabolic process; GO:0044238 primary metabolic process; GO:1901566 organonitrogen compound biosynthetic process; GO:1901576 organic substance biosynthetic process; G…	GO:0005840 ribosome; GO:0043226 organelle; GO:0043229 intracellular organelle; GO:0043232 intracellular non-membrane-bounded organelle; GO:0044464 cell part; GO:0005622 intracellular; GO:0005737 cytoplasm; GO:0032991 macromolecular complex; GO:0044424 intracellular part; GO:1990904 ribonucleoprotein complex; GO:0005623 cell; GO:0030529 intracellular ribonucleoprotein complex; GO:0044444 cytoplasm…	GO:0097159 organic cyclic compound binding; GO:1901363 heterocyclic compound binding; GO:0003723 RNA binding; GO:0005488 binding; GO:0003676 nucleic acid binding; GO:0005198 structural molecule activity; GO:0003735 structural constituent of ribosome;	ppp:PHYPADRAFT_180098; hypothetical protein; K02987 small subunit ribosomal protein S4e (A)	ko03010 Ribosome;	J	40S ribosomal protein S4
F02_cb13282_c21/f1p0/1482	PREDICTED: Ricin B-like lectin EULS3 OS=Arabidopsis thaliana GN=EULS3 PE=1 SV=1	0.376	Down	0.0163433	0.9	--	0.62494	1.481	--	0.184958	0.619	--	0.093578	--	--	--	--	--	--	--
F02_cb12320_c3/f1p0/1185	uncharacterized protein	5.268	Up	0.0003622	2.253	--	0.077956	0.324	Down	0.0064587	0.756	--	0.32386	--	--	--	--	--	--	--
F01_cb11846_c4/f1p0/1653	PREDICTED: Very-long-chain enoyl-CoA reductase OS=Arabidopsis thaliana GN=ECR PE=1 SV=1	1.835	Up	0.0087019	1.399	Up	0.021696	0.533	Down	0.0036588	0.699	Down	0.042823	GO:0044699 single-organism process; GO:0008152 metabolic process; GO:0044238 primary metabolic process; GO:0044710 single-organism metabolic process; GO:0006629 lipid metabolic process; GO:0071704 organic substance metabolic process;	GO:0016020 membrane; GO:0044464 cell part; GO:0005622 intracellular; GO:0044425 membrane part; GO:0005737 cytoplasm; GO:0031224 intrinsic component of membrane; GO:0044424 intracellular part; GO:0005623 cell; GO:0016021 integral component of membrane;	GO:0016627 oxidoreductase activity, acting on the CH-CH group of donors; GO:0003824 catalytic activity; GO:0016491 oxidoreductase activity;	obr:102717286; very-long-chain enoyl-CoA reductase-like; K10258 very-long-chain enoyl-CoA reductase [EC:1.3.1.93] (A)	ko01212 Fatty acid metabolism; ko00062 Fatty acid elongation; ko01040 Biosynthesis of unsaturated fatty acids;	I	Steroid reductase required for elongation of the very long chain fatty acids
F02_cb2928_c2/f1p0/3047	hypothetical protein AMTR_s00106p00019920 [Amborella trichopoda]	6.353	Up	0.000199461	1.763	--	0.31164	0.348	Down	0.033057	1.255	--	0.88006	GO:0044723 single-organism carbohydrate metabolic process; GO:0008152 metabolic process; GO:0005985 sucrose metabolic process; GO:0044262 cellular carbohydrate metabolic process; GO:0044710 single-organism metabolic process; GO:0044763 single-organism cellular process; GO:0044699 single-organism process; GO:0009311 oligosaccharide metabolic process; GO:0005984 disaccharide metabolic process; GO:0…	--	GO:0016758 transferase activity, transferring hexosyl groups; GO:0003824 catalytic activity; GO:0035251 UDP-glucosyltransferase activity; GO:0008194 UDP-glycosyltransferase activity; GO:0046527 glucosyltransferase activity; GO:0016757 transferase activity, transferring glycosyl groups; GO:0016157 sucrose synthase activity; GO:0016740 transferase activity;	atr:s00106p00019920; AMTR_s00106p00019920; hypothetical protein; K00695 sucrose synthase [EC:2.4.1.13] (A)	ko00500 Starch and sucrose metabolism;	M	Glycosyltransferase
F01_cb9396_c2/f1p0/3359	hypothetical protein ZEAMMB73_478467 [Zea mays]	1.707	Up	0.02972	1.153	--	0.32128	0.396	Down	0.00056126	0.587	--	0.054457	GO:0050794 regulation of cellular process; GO:0044700 single organism signaling; GO:0051716 cellular response to stimulus; GO:0007165 signal transduction; GO:0050789 regulation of biological process; GO:0007154 cell communication; GO:0035556 intracellular signal transduction; GO:0044699 single-organism process; GO:0007264 small GTPase mediated signal transduction; GO:0023052 signaling; GO:0050896…	--	GO:1901265 nucleoside phosphate binding; GO:0001882 nucleoside binding; GO:0043167 ion binding; GO:0000166 nucleotide binding; GO:0097159 organic cyclic compound binding; GO:1901363 heterocyclic compound binding; GO:0032549 ribonucleoside binding; GO:0097367 carbohydrate derivative binding; GO:0032553 ribonucleotide binding; GO:0005488 binding; GO:0032550 purine ribonucleoside binding; GO:0043168…	cam:101498836; ras-related protein RABA5a-like; K07904 Ras-related protein Rab-11A (A)	ko04144 Endocytosis;	U	GTPase Rab11/YPT3, small G protein superfamily
F01_cb6204_c6/f1p2/1819	PREDICTED: Ras-related protein RABA4d OS=Arabidopsis thaliana GN=RABA4D PE=1 SV=1	1.494	Up	0.0121592	1.215	--	0.39588	0.712	--	0.113682	0.876	--	0.20348	GO:0050794 regulation of cellular process; GO:0044700 single organism signaling; GO:0051716 cellular response to stimulus; GO:0007165 signal transduction; GO:0050789 regulation of biological process; GO:0007154 cell communication; GO:0035556 intracellular signal transduction; GO:0044699 single-organism process; GO:0007264 small GTPase mediated signal transduction; GO:0023052 signaling; GO:0050896…	--	GO:1901265 nucleoside phosphate binding; GO:0001882 nucleoside binding; GO:0043167 ion binding; GO:0000166 nucleotide binding; GO:0097159 organic cyclic compound binding; GO:1901363 heterocyclic compound binding; GO:0032549 ribonucleoside binding; GO:0097367 carbohydrate derivative binding; GO:0032553 ribonucleotide binding; GO:0005488 binding; GO:0032550 purine ribonucleoside binding; GO:0043168…	cam:101498836; ras-related protein RABA5a-like; K07904 Ras-related protein Rab-11A (A)	ko04144 Endocytosis;	U	GTPase Rab11/YPT3, small G protein superfamily
F01_cb13160_c5/f1p0/900	PREDICTED: Ricin B-like lectin EULS3 OS=Arabidopsis thaliana GN=EULS3 PE=1 SV=1	0.158	Down	0.0040185	0.336	--	0.37624	0.538	--	0.101779	0.253	--	0.072516	--	--	--	--	--	--	--
F01_cb9947_c61/f1p0/1531	PREDICTED: Ricin B-like lectin R40G2 OS=Oryza sativa subsp. japonica GN=R40G2 PE=2 SV=1	0.617	Down	0.0184577	0.195	Down	0.000140169	0.845	--	0.189799	2.678	Up	0.00174281	--	--	--	--	--	--	--
F02_cb9599_c0/f12p2/1349	"""PREDICTED: 2-Cys peroxiredoxin BAS1-like, chloroplastic OS=Arabidopsis thaliana GN=At5g06290 PE=2 SV=3"""	1.39	Up	0.031343	1.313	Up	0.0151848	0.893	--	0.35762	0.946	--	0.39794	GO:0050794 regulation of cellular process; GO:0042592 homeostatic process; GO:0065008 regulation of biological quality; GO:0008152 metabolic process; GO:0050789 regulation of biological process; GO:0055114 oxidation-reduction process; GO:0044710 single-organism metabolic process; GO:0045454 cell redox homeostasis; GO:0044763 single-organism cellular process; GO:0019725 cellular homeostasis; GO:00…	--	GO:0016209 antioxidant activity; GO:0003824 catalytic activity; GO:0051920 peroxiredoxin activity; GO:0016491 oxidoreductase activity; GO:0016684 oxidoreductase activity, acting on peroxide as acceptor;	--	--	O	Alkyl hydroperoxide reductase, thiol specific antioxidant and related enzymes
F02_cb6398_c30/f1p0/1752	PREDICTED: Flowering locus K homology domain OS=Arabidopsis thaliana GN=FLK PE=1 SV=1	0.526	Down	0.036322	--	--	--	--	--	--	--	--	--	--	--	GO:0097159 organic cyclic compound binding; GO:1901363 heterocyclic compound binding; GO:0003723 RNA binding; GO:0005488 binding; GO:0003676 nucleic acid binding;	--	--	AR	PolyC-binding proteins alphaCP-1 and related KH domain proteins
F02_cb13605_c1/f1p2/1822	unknown [Picea sitchensis]	1.901	Up	0.028164	1.747	Up	9.5304e-05	0.313	Down	4.1446e-05	0.34	Down	0.0060206	--	--	--	--	--	--	--
F01_cb11768_c0/f1p0/1336	predicted protein [Physcomitrella patens]	0.707	Down	0.00036282	1.226	Up	0.0085959	2.204	Up	3.7774e-05	1.272	Up	0.0023398	GO:0009110 vitamin biosynthetic process; GO:0018130 heterocycle biosynthetic process; GO:0044711 single-organism biosynthetic process; GO:0009231 riboflavin biosynthetic process; GO:0055114 oxidation-reduction process; GO:0044281 small molecule metabolic process; GO:0044763 single-organism cellular process; GO:0044699 single-organism process; GO:1901360 organic cyclic compound metabolic process; …	--	GO:1901265 nucleoside phosphate binding; GO:0008703 5-amino-6-(5-phosphoribosylamino)uracil reductase activity; GO:0043167 ion binding; GO:0016787 hydrolase activity; GO:0000166 nucleotide binding; GO:0008270 zinc ion binding; GO:0048037 cofactor binding; GO:0016491 oxidoreductase activity; GO:0016614 oxidoreductase activity, acting on CH-OH group of donors; GO:1901363 heterocyclic compound bindi…	--	--	F	Cytosine deaminase FCY1 and related enzymes
F02_cb8754_c0/f3p0/1143	PREDICTED: Ras-related protein RABA1f OS=Arabidopsis thaliana GN=RABA1F PE=2 SV=1	1.57	Up	0.046418	1.032	--	0.86106	0.481	Down	0.0065031	0.733	--	0.10694	GO:0050794 regulation of cellular process; GO:0044700 single organism signaling; GO:0051716 cellular response to stimulus; GO:0007165 signal transduction; GO:0050789 regulation of biological process; GO:0007154 cell communication; GO:0035556 intracellular signal transduction; GO:0044699 single-organism process; GO:0007264 small GTPase mediated signal transduction; GO:0023052 signaling; GO:0050896…	--	GO:1901265 nucleoside phosphate binding; GO:0001882 nucleoside binding; GO:0043167 ion binding; GO:0000166 nucleotide binding; GO:0097159 organic cyclic compound binding; GO:1901363 heterocyclic compound binding; GO:0032549 ribonucleoside binding; GO:0097367 carbohydrate derivative binding; GO:0032553 ribonucleotide binding; GO:0005488 binding; GO:0032550 purine ribonucleoside binding; GO:0043168…	cam:101498836; ras-related protein RABA5a-like; K07904 Ras-related protein Rab-11A (A)	ko04144 Endocytosis;	U	GTPase Rab11/YPT3, small G protein superfamily
F01_cb4042_c5/f2p1/2172	"""PREDICTED: NADH dehydrogenase [ubiquinone] flavoprotein 1, mitochondrial [Elaeis guineensis]"""	0.463	Down	0.0077	0.905	--	0.25114	2.402	Up	0.00038178	1.229	--	0.2077	GO:0044699 single-organism process; GO:0008152 metabolic process; GO:0055114 oxidation-reduction process; GO:0044710 single-organism metabolic process;	--	GO:0016651 oxidoreductase activity, acting on NAD(P)H; GO:1901265 nucleoside phosphate binding; GO:0043167 ion binding; GO:0050136 NADH dehydrogenase (quinone) activity; GO:0000166 nucleotide binding; GO:0051539 4 iron, 4 sulfur cluster binding; GO:0048037 cofactor binding; GO:0016655 oxidoreductase activity, acting on NAD(P)H, quinone or similar compound as acceptor; GO:0008137 NADH dehydrogenas…	mdm:103423822; NADH dehydrogenase [ubiquinone] flavoprotein 1, mitochondrial; K03942 NADH dehydrogenase (ubiquinone) flavoprotein 1 [EC:1.6.5.3 1.6.99.3] (A)	ko00190 Oxidative phosphorylation;	C	NADH:ubiquinone oxidoreductase, NDUFV1/51kDa subunit
F02_cb6582_c48/f1p0/1633	"""PREDICTED: Triose phosphate/phosphate translocator, chloroplastic OS=Spinacia oleracea PE=1 SV=1"""	1.857	Up	0.00164037	2.424	Up	0.0084571	0.96	--	0.74036	0.736	Down	0.0114759	--	--	--	--	--	GE	Glucose-6-phosphate/phosphate and phosphoenolpyruvate/phosphate antiporter
F01_cb7845_c1/f1p0/1912	PREDICTED: Mevalonate kinase OS=Arabidopsis thaliana GN=At5g27450 PE=2 SV=1	0.661	Down	0.022415	0.888	--	0.020479	2.063	Up	0.0079601	1.534	Up	0.0112019	--	--	--	sot:102582697; mevalonate kinase-like; K00869 mevalonate kinase [EC:2.7.1.36] (A)	ko04146 Peroxisome; ko00900 Terpenoid backbone biosynthesis;	I	Mevalonate kinase MVK/ERG12
F01_cb13527_c0/f4p0/1562	Proteasome assembly chaperone 2 [Gossypium arboreum]	0.653	Down	0.028597	0.993	--	0.91608	1.825	Up	0.0058006	1.201	--	0.195977	--	--	--	--	--	S	Uncharacterized conserved protein
F02_cb13649_c1/f4p0/1101	unknown [Picea sitchensis]	0.62	Down	0.041901	0.572	--	0.114456	1.316	--	0.61468	1.427	--	0.071081	GO:0006518 peptide metabolic process; GO:0043043 peptide biosynthetic process; GO:0044267 cellular protein metabolic process; GO:0006807 nitrogen compound metabolic process; GO:0009058 biosynthetic process; GO:0043603 cellular amide metabolic process; GO:0044238 primary metabolic process; GO:1901566 organonitrogen compound biosynthetic process; GO:0044237 cellular metabolic process; GO:1901576 or…	--	GO:0097159 organic cyclic compound binding; GO:1901363 heterocyclic compound binding; GO:0003723 RNA binding; GO:0008135 translation factor activity, RNA binding; GO:0005488 binding; GO:0003676 nucleic acid binding; GO:0003743 translation initiation factor activity;	--	--	R	Density-regulated protein related to translation initiation factor 1 (eIF-1/SUI1)
F02_cb7766_c15/f1p0/948	PREDICTED: ABC transporter I family member 17 OS=Arabidopsis thaliana GN=ABCI17 PE=2 SV=1	1.718	Up	0.0129026	1.019	--	0.83632	0.293	Down	0.00049512	0.495	Down	0.03458	GO:0006810 transport; GO:0006820 anion transport; GO:0098661 inorganic anion transmembrane transport; GO:0055085 transmembrane transport; GO:0034220 ion transmembrane transport; GO:0098660 inorganic ion transmembrane transport; GO:0006811 ion transport; GO:0006817 phosphate ion transport; GO:0051179 localization; GO:0035435 phosphate ion transmembrane transport; GO:0015698 inorganic anion transpo…	GO:0016020 membrane;	GO:0022804 active transmembrane transporter activity; GO:0015291 secondary active transmembrane transporter activity; GO:0005524 ATP binding; GO:1901265 nucleoside phosphate binding; GO:0001882 nucleoside binding; GO:0043167 ion binding; GO:0016817 hydrolase activity, acting on acid anhydrides; GO:0016787 hydrolase activity; GO:0000166 nucleotide binding; GO:0017111 nucleoside-triphosphatase acti…	--	--	Q	Multidrug/pheromone exporter, ABC superfamily
F02_cb6831_c3/f3p1/1977	PREDICTED: Peroxidase 63 OS=Arabidopsis thaliana GN=PER63 PE=2 SV=1	2.457	Up	0.030041	1.31	--	0.26982	0.179	Down	0.00132019	0.335	Down	0.022819	GO:0008152 metabolic process; GO:0042743 hydrogen peroxide metabolic process; GO:0006950 response to stress; GO:0072593 reactive oxygen species metabolic process; GO:0055114 oxidation-reduction process; GO:0044710 single-organism metabolic process; GO:0006979 response to oxidative stress; GO:0044699 single-organism process; GO:0044248 cellular catabolic process; GO:0050896 response to stimulus; G…	--	GO:0097159 organic cyclic compound binding; GO:1901363 heterocyclic compound binding; GO:0020037 heme binding; GO:0003824 catalytic activity; GO:0005488 binding; GO:0016209 antioxidant activity; GO:0004601 peroxidase activity; GO:0046906 tetrapyrrole binding; GO:0016491 oxidoreductase activity; GO:0016684 oxidoreductase activity, acting on peroxide as acceptor;	pda:103703770; peroxidase 72-like; K00430 peroxidase [EC:1.11.1.7] (A)	ko00940 Phenylpropanoid biosynthesis; ko00360 Phenylalanine metabolism;	--	--
F01_cb15543_c0/f3p0/1353	"""PREDICTED: 20 kDa chaperonin, chloroplastic OS=Arabidopsis thaliana GN=CPN20 PE=1 SV=2"""	0.32	Down	0.0075985	0.754	Down	0.0023808	0.768	Down	0.03484	0.326	Down	0.035665	GO:0050794 regulation of cellular process; GO:1901671 positive regulation of superoxide dismutase activity; GO:1901033 positive regulation of response to reactive oxygen species; GO:1900409 positive regulation of cellular response to oxidative stress; GO:0080134 regulation of response to stress; GO:0006457 protein folding; GO:1902884 positive regulation of response to oxidative stress; GO:0009893…	GO:0044424 intracellular part; GO:0005623 cell; GO:0044464 cell part; GO:0005622 intracellular; GO:0005737 cytoplasm;	GO:0005524 ATP binding; GO:1901265 nucleoside phosphate binding; GO:0001882 nucleoside binding; GO:0043167 ion binding; GO:0000166 nucleotide binding; GO:0097159 organic cyclic compound binding; GO:1901363 heterocyclic compound binding; GO:0032549 ribonucleoside binding; GO:0097367 carbohydrate derivative binding; GO:0046914 transition metal ion binding; GO:0032553 ribonucleotide binding; GO:0005…	--	--	O	Mitochondrial chaperonin
F02_cb1414_c0/f2p0/6154	PREDICTED: callose synthase 9 [Nelumbo nucifera]	1.546	Up	0.00128287	--	--	--	--	--	--	--	--	--	GO:0016051 carbohydrate biosynthetic process; GO:0006074 (1->3)-beta-D-glucan metabolic process; GO:0044711 single-organism biosynthetic process; GO:0006073 cellular glucan metabolic process; GO:0000271 polysaccharide biosynthetic process; GO:0044042 glucan metabolic process; GO:0044763 single-organism cellular process; GO:0044699 single-organism process; GO:0033692 cellular polysaccharide biosyn…	GO:0016020 membrane; GO:1902494 catalytic complex; GO:0044459 plasma membrane part; GO:0044425 membrane part; GO:0044464 cell part; GO:0071944 cell periphery; GO:0032991 macromolecular complex; GO:1990234 transferase complex; GO:0005623 cell; GO:0000148 1,3-beta-D-glucan synthase complex; GO:0005886 plasma membrane;	GO:0016758 transferase activity, transferring hexosyl groups; GO:0003824 catalytic activity; GO:0035251 UDP-glucosyltransferase activity; GO:0008194 UDP-glycosyltransferase activity; GO:0046527 glucosyltransferase activity; GO:0016757 transferase activity, transferring glycosyl groups; GO:0003843 1,3-beta-D-glucan synthase activity; GO:0016740 transferase activity;	--	--	M	1,3-beta-glucan synthase/callose synthase catalytic subunit
F02_cb15366_c2/f1p0/1182	peroxidase [Picea abies]	2.109	Up	0.031961	1.005	--	0.91678	0.076	Down	0.00035881	0.16	Down	0.00074275	GO:0008152 metabolic process; GO:0042743 hydrogen peroxide metabolic process; GO:0006950 response to stress; GO:0072593 reactive oxygen species metabolic process; GO:0055114 oxidation-reduction process; GO:0044710 single-organism metabolic process; GO:0006979 response to oxidative stress; GO:0044699 single-organism process; GO:0044248 cellular catabolic process; GO:0050896 response to stimulus; G…	--	GO:0097159 organic cyclic compound binding; GO:1901363 heterocyclic compound binding; GO:0020037 heme binding; GO:0003824 catalytic activity; GO:0005488 binding; GO:0016209 antioxidant activity; GO:0004601 peroxidase activity; GO:0046906 tetrapyrrole binding; GO:0016491 oxidoreductase activity; GO:0016684 oxidoreductase activity, acting on peroxide as acceptor;	pda:103703770; peroxidase 72-like; K00430 peroxidase [EC:1.11.1.7] (A)	ko00940 Phenylpropanoid biosynthesis; ko00360 Phenylalanine metabolism;	--	--
F02_cb3623_c7/f1p0/2049	PREDICTED: Probable 2-oxoglutarate-dependent dioxygenase At5g05600 OS=Arabidopsis thaliana GN=At5g05600 PE=2 SV=1	1.837	Up	0.024859	6.222	--	0.112638	6.456	--	0.05238	1.906	Up	0.00148457	GO:0044699 single-organism process; GO:0008152 metabolic process; GO:0055114 oxidation-reduction process; GO:0044710 single-organism metabolic process;	--	GO:0003824 catalytic activity; GO:0016491 oxidoreductase activity;	--	--	QR	Iron/ascorbate family oxidoreductases
F02_cb12773_c4/f1p0/934	PREDICTED: ribonuclease 3-like protein 3 [Phoenix dactylifera]	0.551	Down	0.043705	--	--	--	--	--	--	--	--	--	GO:0006396 RNA processing; GO:0006725 cellular aromatic compound metabolic process; GO:1901360 organic cyclic compound metabolic process; GO:0006807 nitrogen compound metabolic process; GO:0044238 primary metabolic process; GO:0044237 cellular metabolic process; GO:0071704 organic substance metabolic process; GO:0016070 RNA metabolic process; GO:0008152 metabolic process; GO:0090304 nucleic acid …	--	GO:0004525 ribonuclease III activity; GO:0016893 endonuclease activity, active with either ribo- or deoxyribonucleic acids and producing 5'-phosphomonoesters; GO:0003824 catalytic activity; GO:0016788 hydrolase activity, acting on ester bonds; GO:0004518 nuclease activity; GO:0032296 double-stranded RNA-specific ribonuclease activity; GO:0004521 endoribonuclease activity; GO:0016787 hydrolase act…	--	--	A	dsRNA-specific nuclease Dicer and related ribonucleases
F02_cb2195_c21/f1p0/1314	PREDICTED: Peroxisomal (S)-2-hydroxy-acid oxidase GLO1 OS=Arabidopsis thaliana GN=GLO1 PE=1 SV=1	1.284	Up	0.028142	1.183	--	0.20538	0.86	--	0.150162	0.933	--	0.52266	GO:0044699 single-organism process; GO:0008152 metabolic process; GO:0055114 oxidation-reduction process; GO:0044710 single-organism metabolic process;	--	GO:0097159 organic cyclic compound binding; GO:1901363 heterocyclic compound binding; GO:0097367 carbohydrate derivative binding; GO:1901265 nucleoside phosphate binding; GO:0003824 catalytic activity; GO:0032553 ribonucleotide binding; GO:0005488 binding; GO:0043167 ion binding; GO:0043168 anion binding; GO:0000166 nucleotide binding; GO:0010181 FMN binding; GO:0048037 cofactor binding; GO:00164…	pda:103705751; peroxisomal (S)-2-hydroxy-acid oxidase GLO5; K11517 (S)-2-hydroxy-acid oxidase [EC:1.1.3.15] (A)	ko04146 Peroxisome; ko00630 Glyoxylate and dicarboxylate metabolism;	C	Glycolate oxidase
F01_cb13248_c1/f1p0/1271	unknown [Picea sitchensis]	1.986	Up	0.026701	1.718	Up	0.045861	0.477	Down	0.0056203	0.551	--	0.080858	GO:0008152 metabolic process;	--	GO:0003824 catalytic activity;	atr:s00183p00050040; AMTR_s00183p00050040; hypothetical protein; K01557 acylpyruvate hydrolase [EC:3.7.1.5] (A)	ko00350 Tyrosine metabolism;	R	Predicted fumarylacetoacetate hydralase
F01_cb5633_c19/f1p1/2173	unknown [Picea sitchensis]	1.903	Up	0.031738	1.502	--	0.07416	0.994	--	0.95872	1.26	--	0.22658	GO:0006810 transport; GO:0006820 anion transport; GO:0051179 localization; GO:0015698 inorganic anion transport; GO:0015689 molybdate ion transport; GO:0006811 ion transport; GO:0051234 establishment of localization;	GO:0031224 intrinsic component of membrane; GO:0016020 membrane; GO:0016021 integral component of membrane; GO:0044425 membrane part;	GO:0015075 ion transmembrane transporter activity; GO:0022892 substrate-specific transporter activity; GO:0015098 molybdate ion transmembrane transporter activity; GO:0015103 inorganic anion transmembrane transporter activity; GO:0005215 transporter activity; GO:0008509 anion transmembrane transporter activity; GO:0022891 substrate-specific transmembrane transporter activity; GO:0022857 transmemb…	--	--	G	Predicted sugar transporter
F01_cb7680_c0/f4p0/1948	PREDICTED: Rhomboid-like protein 15 OS=Arabidopsis thaliana GN=RBL15 PE=1 SV=2	1.642	Up	0.023036	1.212	--	0.086598	0.597	Down	0.0055816	0.809	--	0.21352	--	GO:0031224 intrinsic component of membrane; GO:0016020 membrane; GO:0016021 integral component of membrane; GO:0044425 membrane part;	GO:0004252 serine-type endopeptidase activity; GO:0004175 endopeptidase activity; GO:0008233 peptidase activity; GO:0003824 catalytic activity; GO:0017171 serine hydrolase activity; GO:0005488 binding; GO:0008236 serine-type peptidase activity; GO:0070011 peptidase activity, acting on L-amino acid peptides; GO:0005515 protein binding; GO:0016787 hydrolase activity;	--	--	S	Rhomboid family proteins
F01_cb10403_c20/f6p2/785	PREDICTED: Major pollen allergen Bet v 1-M/N OS=Betula pendula GN=BETV1M PE=1 SV=2	0.061	Down	0.0095641	0.106	--	0.26058	0.747	--	0.134442	0.433	--	0.20394	GO:0006952 defense response; GO:0050896 response to stimulus; GO:0006950 response to stress; GO:0009607 response to biotic stimulus;	--	--	--	--	--	--
F01_cb10891_c6/f1p0/1195	PREDICTED: Ubiquitin carboxyl-terminal hydrolase 3 OS=Arabidopsis thaliana GN=UCH3 PE=2 SV=1	0.501	Down	0.00060491	0.805	Down	0.022719	1.289	Up	0.040079	0.803	Down	0.0041234	GO:0043632 modification-dependent macromolecule catabolic process; GO:0044265 cellular macromolecule catabolic process; GO:0051603 proteolysis involved in cellular protein catabolic process; GO:0044257 cellular protein catabolic process; GO:0019941 modification-dependent protein catabolic process; GO:0044267 cellular protein metabolic process; GO:0006511 ubiquitin-dependent protein catabolic proc…	GO:0005623 cell; GO:0005622 intracellular; GO:0044464 cell part;	GO:0004843 thiol-dependent ubiquitin-specific protease activity; GO:0008233 peptidase activity; GO:0036459 thiol-dependent ubiquitinyl hydrolase activity; GO:0003824 catalytic activity; GO:0101005 ubiquitinyl hydrolase activity; GO:0070011 peptidase activity, acting on L-amino acid peptides; GO:0019783 ubiquitin-like protein-specific protease activity; GO:0008234 cysteine-type peptidase activity;…	--	--	O	Ubiquitin C-terminal hydrolase UCHL1
F02_cb12019_c1/f1p0/1495	PREDICTED: derlin-1 [Nelumbo nucifera]	1.685	Up	0.041518	1.304	--	0.138077	0.533	Down	0.0152048	0.688	--	0.097876	--	--	--	pda:103714347; derlin-1-like; K13989 Derlin-2/3 (A)	ko04141 Protein processing in endoplasmic reticulum;	S	Predicted membrane protein
F01_cb14941_c6/f1p1/1346	PREDICTED: GDSL esterase/lipase At4g01130 OS=Arabidopsis thaliana GN=At4g01130 PE=2 SV=1	2.68	Up	0.037758	--	--	--	--	--	--	--	--	--	--	--	GO:0016787 hydrolase activity; GO:0003824 catalytic activity; GO:0016788 hydrolase activity, acting on ester bonds;	--	--	--	--
F02_cb14040_c4/f1p0/1276	unknown [Picea sitchensis]	1.603	Up	0.036422	0.999	--	0.9632	0.44	Down	0.00166315	0.705	--	0.133083	GO:0016070 RNA metabolic process; GO:0008152 metabolic process; GO:0046483 heterocycle metabolic process; GO:0090304 nucleic acid metabolic process; GO:0006725 cellular aromatic compound metabolic process; GO:0006139 nucleobase-containing compound metabolic process; GO:0044260 cellular macromolecule metabolic process; GO:1901360 organic cyclic compound metabolic process; GO:0006807 nitrogen compo…	--	GO:0097159 organic cyclic compound binding; GO:1901363 heterocyclic compound binding; GO:0003677 DNA binding; GO:0003723 RNA binding; GO:0005488 binding; GO:0003676 nucleic acid binding; GO:0003697 single-stranded DNA binding; GO:0043565 sequence-specific DNA binding;	--	--	R	Translin family protein
F02_cb13213_c11/f1p0/793	calcium binding protein [Pinus taeda]	6.56	Up	8.1682e-05	--	--	--	0.19	Down	0.029579	--	--	--	--	--	GO:0043169 cation binding; GO:0046872 metal ion binding; GO:0005509 calcium ion binding; GO:0005488 binding; GO:0043167 ion binding;	pda:103709704; probable calcium-binding protein CML27; K13448 calcium-binding protein CML (A)	ko04626 Plant-pathogen interaction;	T	Calmodulin and related proteins (EF-Hand superfamily)
F02_cb6399_c2/f1p0/2314	PREDICTED: protein NLRC3 [Musa acuminata subsp. malaccensis]	1.234	Up	0.00039819	1.123	--	0.174562	1.262	Up	0.0160004	1.386	Up	0.00182124	--	--	GO:0005515 protein binding; GO:0005488 binding;	--	--	S	LRR-containing protein
F01_cb7954_c2/f1p1/1895	"""PREDICTED: Protein ABCI7, chloroplastic OS=Arabidopsis thaliana GN=ABCI7 PE=1 SV=1"""	0.5	Down	0.00049909	1.213	--	0.2283	2.976	Up	0.00039678	1.228	--	0.155045	GO:0006790 sulfur compound metabolic process; GO:0044085 cellular component biogenesis; GO:0051188 cofactor biosynthetic process; GO:0016043 cellular component organization; GO:0008152 metabolic process; GO:0031163 metallo-sulfur cluster assembly; GO:0022607 cellular component assembly; GO:0016226 iron-sulfur cluster assembly; GO:0009058 biosynthetic process; GO:0009987 cellular process; GO:00442…	--	--	--	--	--	--
F02_cb10355_c5/f1p0/407	unknown [Picea sitchensis]	2.035	Up	0.0046363	--	--	--	--	--	--	--	--	--	--	--	--	--	--	--	--
F01_cb13820_c2/f1p0/1529	unknown [Picea sitchensis]	2.237	Up	0.0119805	2.321	Up	0.0049994	0.518	Down	0.0171818	0.499	Down	0.0161156	--	--	--	--	--	S	Uncharacterized membrane protein
F01_cb15159_c1/f1p0/1509	PREDICTED: Rhomboid-like protein 19 OS=Arabidopsis thaliana GN=RBL19 PE=2 SV=1	1.57	Up	0.029478	0.766	--	0.26456	0.342	Down	0.028397	0.701	--	0.126175	GO:0006810 transport; GO:0048193 Golgi vesicle transport; GO:0051179 localization; GO:0006890 retrograde vesicle-mediated transport, Golgi to ER; GO:0051234 establishment of localization; GO:0016192 vesicle-mediated transport;	GO:0031224 intrinsic component of membrane; GO:0016020 membrane; GO:0016021 integral component of membrane; GO:0044425 membrane part;	GO:0004252 serine-type endopeptidase activity; GO:0004175 endopeptidase activity; GO:0008233 peptidase activity; GO:0003824 catalytic activity; GO:0017171 serine hydrolase activity; GO:0008236 serine-type peptidase activity; GO:0070011 peptidase activity, acting on L-amino acid peptides; GO:0016787 hydrolase activity;	--	--	S	Predicted membrane protein
F01_cb11780_c1/f2p0/1076	"""PREDICTED: Outer envelope pore protein 16-3, chloroplastic/mitochondrial OS=Arabidopsis thaliana GN=OEP163 PE=1 SV=1"""	1.603	Up	0.032999	1.48	--	0.152036	0.464	Down	0.0092199	0.503	Down	0.030655	--	--	--	--	--	U	Mitochondrial import inner membrane translocase, subunit TIM22
F01_cb10357_c51/f1p0/796	unknown [Picea sitchensis]	0.349	Down	0.0458	0.821	--	0.50316	0.228	Down	0.00037609	0.097	Down	0.00408	--	--	--	--	--	--	--
F01_cb8378_c1/f5p0/1794	"""PREDICTED: Prohibitin-6, mitochondrial OS=Arabidopsis thaliana GN=PHB6 PE=1 SV=1"""	0.165	Down	0.0069366	0.15	Down	0.00032124	0.606	--	0.20384	0.666	--	0.050824	--	GO:0016020 membrane;	--	--	--	O	Prohibitin-like protein
F02_cb14922_c2/f1p0/1615	PREDICTED: GDSL esterase/lipase At5g22810 OS=Arabidopsis thaliana GN=At5g22810 PE=3 SV=3	1.958	Up	0.04016	--	--	--	--	--	--	--	--	--	--	--	GO:0016787 hydrolase activity; GO:0003824 catalytic activity; GO:0016788 hydrolase activity, acting on ester bonds;	--	--	--	--
F02_cb11849_c5/f1p0/1074	PREDICTED: 60S ribosomal protein L8 OS=Solanum lycopersicum GN=RPL8 PE=2 SV=1	0.601	Down	0.005279	0.88	--	0.42592	1.822	--	0.085576	1.244	--	0.075619	GO:0006518 peptide metabolic process; GO:0043043 peptide biosynthetic process; GO:0044267 cellular protein metabolic process; GO:0006807 nitrogen compound metabolic process; GO:0009058 biosynthetic process; GO:0043603 cellular amide metabolic process; GO:0044238 primary metabolic process; GO:1901566 organonitrogen compound biosynthetic process; GO:1901576 organic substance biosynthetic process; G…	GO:0005840 ribosome; GO:0043226 organelle; GO:0043229 intracellular organelle; GO:0043232 intracellular non-membrane-bounded organelle; GO:0044464 cell part; GO:0005622 intracellular; GO:0005737 cytoplasm; GO:0032991 macromolecular complex; GO:0044424 intracellular part; GO:1990904 ribonucleoprotein complex; GO:0005623 cell; GO:0030529 intracellular ribonucleoprotein complex; GO:0044444 cytoplasm…	GO:0003735 structural constituent of ribosome; GO:0005198 structural molecule activity;	obr:102723052; 60S ribosomal protein L8-like; K02938 large subunit ribosomal protein L8e (A)	ko03010 Ribosome;	J	60s ribosomal protein L2/L8
F02_cb5591_c21/f1p0/1566	PREDICTED: Peptidyl-prolyl cis-trans isomerase FKBP65 OS=Arabidopsis thaliana GN=FKBP65 PE=1 SV=1	2.927	Up	0.00103522	--	--	--	--	--	--	--	--	--	--	--	--	--	--	O	FKBP-type peptidyl-prolyl cis-trans isomerase
F02_cb15152_c0/f1p0/1607	PREDICTED: haloacid dehalogenase-like hydrolase domain-containing protein Sgpp isoform X1 [Nelumbo nucifera]	0.476	Down	0.020315	0.725	--	0.138643	3.812	Up	8.291e-05	2.504	Up	0.0176207	GO:0008152 metabolic process;	--	GO:0016787 hydrolase activity; GO:0003824 catalytic activity;	--	--	R	Predicted haloacid-halidohydrolase and related hydrolases
F02_cb10853_c30/f7p0/1629	PREDICTED: 2-alkenal reductase (NADP(+)-dependent) OS=Nicotiana tabacum GN=DBR PE=1 SV=1	4.633	Up	0.0027374	21.983	Up	0.00027748	2.362	Up	0.0094606	0.498	--	0.083915	GO:0044699 single-organism process; GO:0008152 metabolic process; GO:0055114 oxidation-reduction process; GO:0044710 single-organism metabolic process;	--	GO:0003824 catalytic activity; GO:0016491 oxidoreductase activity;	--	--	R	Predicted NAD-dependent oxidoreductase
F01_cb12061_c7/f13p0/1049	unknown [Picea sitchensis]	1.749	Up	0.042737	1.539	Up	0.0176818	0.499	Down	0.0076961	0.568	Down	0.038776	GO:0006457 protein folding; GO:0009987 cellular process;	GO:0016272 prefoldin complex; GO:0032991 macromolecular complex; GO:0043234 protein complex;	GO:0005515 protein binding; GO:0051082 unfolded protein binding; GO:0005488 binding;	--	--	O	Prefoldin subunit 6, KE2 family
F01_cb5000_c14838/f4p1/2376	PREDICTED: Lipase-like PAD4 OS=Arabidopsis thaliana GN=PAD4 PE=1 SV=1	0.086	Down	0.0070843	0.27	Down	0.00101564	4.787	Up	0.0024801	1.521	--	0.25778	GO:0044699 single-organism process; GO:0008152 metabolic process; GO:0044238 primary metabolic process; GO:0044710 single-organism metabolic process; GO:0006629 lipid metabolic process; GO:0071704 organic substance metabolic process;	--	--	--	--	--	--
F02_cb13703_c0/f1p0/1309	"""PREDICTED: Probable trans-2-enoyl-CoA reductase, mitochondrial OS=Arabidopsis thaliana GN=At3g45770 PE=1 SV=1"""	2.018	Up	0.0063975	2.141	Up	0.034184	0.642	--	0.10678	0.605	Down	0.029759	--	--	--	vvi:100253519; probable trans-2-enoyl-CoA reductase, mitochondrial; K07512 mitochondrial trans-2-enoyl-CoA reductase [EC:1.3.1.38] (A)	ko01212 Fatty acid metabolism; ko00062 Fatty acid elongation;	KC	Zn2+-binding dehydrogenase (nuclear receptor binding factor-1)
F02_cb6692_c9/f1p1/2155	protein disulfide isomerase-like protein [Gossypium hirsutum]	1.413	Up	0.0182951	1.084	--	0.3782	0.383	Down	0.00027814	0.5	Down	0.00151934	GO:0050794 regulation of cellular process; GO:0042592 homeostatic process; GO:0065008 regulation of biological quality; GO:0050789 regulation of biological process; GO:0045454 cell redox homeostasis; GO:0044763 single-organism cellular process; GO:0019725 cellular homeostasis; GO:0044699 single-organism process; GO:0009987 cellular process; GO:0065007 biological regulation;	--	--	tcc:TCM_046896; Disulfide isomerase-like protein; K09580 protein disulfide-isomerase A1 [EC:5.3.4.1] (A)	ko04141 Protein processing in endoplasmic reticulum;	O	Protein disulfide isomerase (prolyl 4-hydroxylase beta subunit)
F01_cb1151_c11/f1p0/1818	hypothetical protein JCGZ_25626 [Jatropha curcas]	1.663	Up	0.0177019	--	--	--	--	--	--	--	--	--	--	--	--	--	--	T	Zn-binding protein Push
F01_cb8748_c1/f1p1/2134	phosphoglycerate mutase family protein [Populus trichocarpa]	0.258	Down	0.043856	0.3	Down	0.000156572	2.143	Up	0.00024444	1.845	--	0.076238	GO:0046365 monosaccharide catabolic process; GO:0044724 single-organism carbohydrate catabolic process; GO:0044712 single-organism catabolic process; GO:0044281 small molecule metabolic process; GO:0044699 single-organism process; GO:0044282 small molecule catabolic process; GO:0044238 primary metabolic process; GO:0005975 carbohydrate metabolic process; GO:0071704 organic substance metabolic pro…	GO:0044424 intracellular part; GO:0005623 cell; GO:0044464 cell part; GO:0005622 intracellular; GO:0005737 cytoplasm;	GO:0016853 isomerase activity; GO:0046914 transition metal ion binding; GO:0003824 catalytic activity; GO:0005488 binding; GO:0016868 intramolecular transferase activity, phosphotransferases; GO:0043167 ion binding; GO:0043169 cation binding; GO:0046872 metal ion binding; GO:0004619 phosphoglycerate mutase activity; GO:0016866 intramolecular transferase activity; GO:0030145 manganese ion binding;	pop:POPTR_0016s14950g; POPTRDRAFT_825441; phosphoglycerate mutase family protein; K15633 2,3-bisphosphoglycerate-independent phosphoglycerate mutase [EC:5.4.2.12] (A)	ko00010 Glycolysis / Gluconeogenesis; ko01200 Carbon metabolism; ko01230 Biosynthesis of amino acids; ko00260 Glycine, serine and threonine metabolism;	G	Phosphoglycerate mutase
F02_cb9735_c1275/f1p0/2551	PREDICTED: Probable methyltransferase PMT17 OS=Arabidopsis thaliana GN=At4g10440 PE=3 SV=1	1.952	Up	0.0192046	--	--	--	--	--	--	--	--	--	--	--	GO:0016741 transferase activity, transferring one-carbon groups; GO:0008168 methyltransferase activity; GO:0003824 catalytic activity; GO:0016740 transferase activity;	--	--	--	--
F02_cb13909_c1/f1p0/957	unknown [Picea sitchensis]	1.551	Up	0.04402	1.665	Up	0.041904	0.869	--	0.34036	0.81	--	0.337	--	--	GO:0043169 cation binding; GO:0046872 metal ion binding; GO:0005509 calcium ion binding; GO:0005488 binding; GO:0043167 ion binding;	--	--	T	Ca2+-binding protein, EF-Hand protein superfamily
F01_cb4541_c10/f1p0/2202	hypothetical protein AMTR_s00079p00125070 [Amborella trichopoda]	1.492	Up	0.027902	1.044	--	0.90312	0.888	--	0.49036	1.27	--	0.176696	--	--	--	--	--	--	--
F02_cb5248_c90/f1p0/1041	PREDICTED: Senescence/dehydration-associated protein At3g51250 OS=Arabidopsis thaliana GN=At3g51250 PE=2 SV=1	0.451	Down	0.0131566	0.496	Down	0.047096	0.575	--	0.086802	0.522	Down	0.024336	--	--	--	--	--	--	--
F02_cb3109_c5/f1p0/2626	PREDICTED: uncharacterized protein LOC104106588 [Nicotiana tomentosiformis]	1.663	Up	0.0162405	1.347	Up	0.043956	0.935	--	0.66072	1.154	--	0.2475	--	--	--	--	--	--	--
F02_cb541_c7/f1p1/3719	PREDICTED: Phospholipase D delta OS=Arabidopsis thaliana GN=PLDDELTA PE=1 SV=2	6.305	Up	7.8055e-05	3.662	Up	0.000100708	0.572	Down	0.0041365	0.984	--	0.88682	GO:0046470 phosphatidylcholine metabolic process; GO:0046486 glycerolipid metabolic process; GO:0044763 single-organism cellular process; GO:0097164 ammonium ion metabolic process; GO:0006807 nitrogen compound metabolic process; GO:0044699 single-organism process; GO:0044255 cellular lipid metabolic process; GO:0044238 primary metabolic process; GO:0044237 cellular metabolic process; GO:0006796 p…	GO:0016020 membrane;	GO:0003824 catalytic activity; GO:0042578 phosphoric ester hydrolase activity; GO:0005488 binding; GO:0043167 ion binding; GO:0016788 hydrolase activity, acting on ester bonds; GO:0004630 phospholipase D activity; GO:0004620 phospholipase activity; GO:0043169 cation binding; GO:0046872 metal ion binding; GO:0005515 protein binding; GO:0008081 phosphoric diester hydrolase activity; GO:0016787 hydr…	atr:s00078p00051300; AMTR_s00078p00051300; hypothetical protein; K01115 phospholipase D1/2 [EC:3.1.4.4] (A)	ko00564 Glycerophospholipid metabolism; ko00565 Ether lipid metabolism; ko04144 Endocytosis;	I	Phospholipase D1
F01_cb14274_c7/f9p0/1332	"""PREDICTED: 20 kDa chaperonin, chloroplastic OS=Arabidopsis thaliana GN=CPN20 PE=1 SV=2"""	0.13	Down	0.00184419	0.327	Down	2.4218e-05	1.153	--	0.37634	0.457	--	0.083357	GO:0050794 regulation of cellular process; GO:1901671 positive regulation of superoxide dismutase activity; GO:1901033 positive regulation of response to reactive oxygen species; GO:1900409 positive regulation of cellular response to oxidative stress; GO:0080134 regulation of response to stress; GO:0006457 protein folding; GO:1902884 positive regulation of response to oxidative stress; GO:0009893…	GO:0044424 intracellular part; GO:0005623 cell; GO:0044464 cell part; GO:0005622 intracellular; GO:0005737 cytoplasm;	GO:0005524 ATP binding; GO:1901265 nucleoside phosphate binding; GO:0001882 nucleoside binding; GO:0043167 ion binding; GO:0000166 nucleotide binding; GO:0097159 organic cyclic compound binding; GO:1901363 heterocyclic compound binding; GO:0032549 ribonucleoside binding; GO:0097367 carbohydrate derivative binding; GO:0046914 transition metal ion binding; GO:0032553 ribonucleotide binding; GO:0005…	--	--	O	Mitochondrial chaperonin
F02_cb7142_c17/f5p2/2130	hypothetical protein AMTR_s00045p00233670 [Amborella trichopoda]	0.569	Down	0.040139	0.912	--	0.53362	1.817	Up	0.026678	1.134	--	0.46702	--	--	GO:0005515 protein binding; GO:0005488 binding;	atr:s00045p00233670; AMTR_s00045p00233670; hypothetical protein; K12862 pleiotropic regulator 1 (A)	ko03040 Spliceosome;	--	--
F02_cb15013_c2/f1p0/1211	unknown [Picea sitchensis]	0.646	Down	0.0084231	0.414	Down	0.0044159	0.892	--	0.4998	1.393	Up	0.0024044	--	--	--	--	--	O	Thioredoxin-like protein
F01_cb13495_c3/f1p0/1453	PREDICTED: Replication factor C subunit 2 OS=Oryza sativa subsp. japonica GN=RFC2 PE=2 SV=1	0.751	Down	0.031557	--	--	--	--	--	--	--	--	--	GO:0006260 DNA replication; GO:0006725 cellular aromatic compound metabolic process; GO:0006259 DNA metabolic process; GO:1901360 organic cyclic compound metabolic process; GO:0006807 nitrogen compound metabolic process; GO:0009058 biosynthetic process; GO:0044238 primary metabolic process; GO:1901576 organic substance biosynthetic process; GO:0044237 cellular metabolic process; GO:0044249 cellul…	--	GO:0003677 DNA binding; GO:0005524 ATP binding; GO:1901265 nucleoside phosphate binding; GO:0001882 nucleoside binding; GO:0043167 ion binding; GO:0000166 nucleotide binding; GO:1901363 heterocyclic compound binding; GO:0097159 organic cyclic compound binding; GO:0032549 ribonucleoside binding; GO:0097367 carbohydrate derivative binding; GO:0032553 ribonucleotide binding; GO:0005488 binding; GO:0…	cam:101510692; replication factor C subunit 2-like; K10755 replication factor C subunit 2/4 (A)	ko03430 Mismatch repair; ko03030 DNA replication; ko03420 Nucleotide excision repair;	L	Replication factor C, subunit RFC4
F01_cb12299_c2/f2p1/1476	PREDICTED: Ras-related protein RABB1c OS=Arabidopsis thaliana GN=RABB1C PE=1 SV=1	1.264	Up	0.00052349	0.912	--	0.47482	0.554	Down	0.036356	0.768	Down	0.0102044	GO:0050794 regulation of cellular process; GO:0044700 single organism signaling; GO:0051716 cellular response to stimulus; GO:0007165 signal transduction; GO:0050789 regulation of biological process; GO:0007154 cell communication; GO:0035556 intracellular signal transduction; GO:0044699 single-organism process; GO:0007264 small GTPase mediated signal transduction; GO:0023052 signaling; GO:0050896…	--	GO:1901265 nucleoside phosphate binding; GO:0001882 nucleoside binding; GO:0043167 ion binding; GO:0000166 nucleotide binding; GO:0097159 organic cyclic compound binding; GO:1901363 heterocyclic compound binding; GO:0032549 ribonucleoside binding; GO:0097367 carbohydrate derivative binding; GO:0032553 ribonucleotide binding; GO:0005488 binding; GO:0032550 purine ribonucleoside binding; GO:0043168…	--	--	U	GTPase Rab2, small G protein superfamily
F02_cb9336_c5/f3p0/1460	PREDICTED: SelT-like protein OS=Arabidopsis thaliana GN=At3g47300 PE=2 SV=2	1.529	Up	0.0138408	1.272	--	0.121604	1.225	--	0.166724	1.473	Up	0.021262	--	--	--	--	--	R	Selenoprotein T
F02_cb12208_c3/f1p0/1280	unknown [Picea sitchensis]	1.426	Up	0.020985	1.147	--	0.28744	0.706	Down	0.027557	0.877	--	0.27712	GO:0050794 regulation of cellular process; GO:0010468 regulation of gene expression; GO:0006355 regulation of transcription, DNA-templated; GO:0031326 regulation of cellular biosynthetic process; GO:0080090 regulation of primary metabolic process; GO:0060255 regulation of macromolecule metabolic process; GO:0019219 regulation of nucleobase-containing compound metabolic process; GO:0010556 regulat…	--	GO:0097159 organic cyclic compound binding; GO:1901363 heterocyclic compound binding; GO:0003677 DNA binding; GO:0003690 double-stranded DNA binding; GO:0005488 binding; GO:0003676 nucleic acid binding;	--	--	KR	Mitochondrial transcription termination factor, mTERF
F02_cb3702_c12/f1p0/1878	"""hypothetical protein SELMODRAFT_63506, partial [Selaginella moellendorffii]"""	1.648	Up	0.0136967	--	--	--	--	--	--	--	--	--	--	--	GO:0016787 hydrolase activity; GO:0003824 catalytic activity;	smo:SELMODRAFT_63506; hypothetical protein; K01510 apyrase [EC:3.6.1.5] (A)	ko00230 Purine metabolism; ko00240 Pyrimidine metabolism;	F	Nucleoside phosphatase
F01_cb4712_c0/f12p2/1124	PREDICTED: Ubiquitin-conjugating enzyme E2 36 OS=Arabidopsis thaliana GN=UBC36 PE=1 SV=1	1.834	Up	0.0142837	1.625	Up	0.029855	0.673	Down	0.041863	0.76	--	0.172956	--	--	--	tcc:TCM_031769; Ubiquitin-conjugating enzyme 36 isoform 1; K10580 ubiquitin-conjugating enzyme E2 N [EC:6.3.2.19] (A)	ko04120 Ubiquitin mediated proteolysis;	O	Ubiquitin-protein ligase
F01_cb10742_c1/f1p0/839	"""PREDICTED: Thioredoxin M-type, chloroplastic OS=Pisum sativum PE=2 SV=1"""	1.432	Up	0.0098967	1.332	Up	0.00030401	0.94	--	0.25234	1.011	--	0.84504	GO:0050794 regulation of cellular process; GO:0065008 regulation of biological quality; GO:0045454 cell redox homeostasis; GO:0044281 small molecule metabolic process; GO:0044763 single-organism cellular process; GO:0019725 cellular homeostasis; GO:0018904 ether metabolic process; GO:0044699 single-organism process; GO:0071704 organic substance metabolic process; GO:0042592 homeostatic process; G…	--	GO:0015035 protein disulfide oxidoreductase activity; GO:0016667 oxidoreductase activity, acting on a sulfur group of donors; GO:0015036 disulfide oxidoreductase activity; GO:0003824 catalytic activity; GO:0016491 oxidoreductase activity;	--	--	O	Thioredoxin-like protein
F02_cb11862_c29/f1p0/1142	PREDICTED: Nuclear transcription factor Y subunit C-4 OS=Oryza sativa subsp. japonica GN=NFYC4 PE=1 SV=1	1.299	Up	0.038741	--	--	--	--	--	--	--	--	--	--	--	GO:0005515 protein binding; GO:0046982 protein heterodimerization activity; GO:0005488 binding; GO:0046983 protein dimerization activity;	--	--	K	CCAAT-binding factor, subunit C (HAP5)
F01_cb15236_c0/f2p0/1431	unknown [Picea sitchensis]	1.604	Up	0.032059	1.191	--	0.30144	0.606	Down	0.0155996	0.816	--	0.319	GO:0050794 regulation of cellular process; GO:0042592 homeostatic process; GO:0065008 regulation of biological quality; GO:0050789 regulation of biological process; GO:0045454 cell redox homeostasis; GO:0044763 single-organism cellular process; GO:0019725 cellular homeostasis; GO:0044699 single-organism process; GO:0009987 cellular process; GO:0065007 biological regulation;	--	GO:0009055 electron carrier activity; GO:0015035 protein disulfide oxidoreductase activity; GO:0015036 disulfide oxidoreductase activity; GO:0016853 isomerase activity; GO:0003824 catalytic activity; GO:0005488 binding; GO:0016667 oxidoreductase activity, acting on a sulfur group of donors; GO:0005515 protein binding; GO:0016860 intramolecular oxidoreductase activity; GO:0050220 prostaglandin-E s…	pmum:103338692; prostaglandin E synthase 2-like; K05309 microsomal prostaglandin-E synthase 2 [EC:5.3.99.3] (A)	ko00590 Arachidonic acid metabolism;	R	Glutathione S-transferase-related protein
F01_cb10725_c1/f1p0/813	PREDICTED: 14 kDa zinc-binding protein OS=Zea mays GN=ZBP14 PE=1 SV=1	1.955	Up	0.0077986	--	--	--	--	--	--	--	--	--	--	--	GO:0003824 catalytic activity;	--	--	T	Zinc-binding protein of the histidine triad (HIT) family
F02_cb5551_c5/f1p0/2163	hypothetical protein SELMODRAFT_122417 [Selaginella moellendorffii]	2.311	Up	0.0091563	0.979	--	0.74396	0.265	Down	0.00038183	0.625	--	0.097502	--	--	--	--	--	D	Spindle pole body protein, contains UNC-84 domain
F02_cb15607_c1/f1p0/1404	PREDICTED: Immune-associated nucleotide-binding protein 9 OS=Arabidopsis thaliana GN=IAN9 PE=2 SV=1	1.885	Up	0.0169586	1.357	--	0.4579	0.191	Down	0.0045193	0.265	Down	0.023905	--	--	GO:1901265 nucleoside phosphate binding; GO:0001882 nucleoside binding; GO:0043167 ion binding; GO:0000166 nucleotide binding; GO:0097159 organic cyclic compound binding; GO:1901363 heterocyclic compound binding; GO:0032549 ribonucleoside binding; GO:0097367 carbohydrate derivative binding; GO:0032553 ribonucleotide binding; GO:0005488 binding; GO:0032550 purine ribonucleoside binding; GO:0043168…	--	--	--	--
[truncated: 2,327 more rows]
