# Supplementary material for: Physiological, Proteomic, and Resin Yield-Related Genes Expression Analysis Provides Insights into the Mechanisms Regulating Resin Yield in Masson Pine
Source: Int J Mol Sci. 2023 Sep 7;24(18):13813. doi: 10.3390/ijms241813813 (PMC10531451; doi:10.3390/ijms241813813)
Supplement: Supplementary file 1 [file ijms-24-13813-s001.zip › Table S2.xlsx]

## Sheet: Sheet1
Table S2. Identification of eight distinct patterns of DEPs expression by Mfuzz clustering.
Protein	Cluster
F01_cb10006_c62/f1p0/1506	3
F01_cb10182_c18/f1p1/1069	2
F01_cb10897_c26/f1p0/949	8
F01_cb7289_c20/f1p0/1778	6
F01_cb7324_c1/f1p0/2016	2
F01_cb7327_c16/f1p1/1813	5
F01_cb7330_c9/f1p0/1782	2
F01_cb7345_c8/f1p1/2005	6
F01_cb10905_c3/f2p3/1224	2
F01_cb7368_c11/f5p0/1858	3
F01_cb7376_c44/f39p3/1821	3
F01_cb7387_c3/f1p0/1927	3
F01_cb7399_c311/f1p0/2567	8
F01_cb7414_c29/f1p1/2003	6
F01_cb7431_c5/f1p1/2139	2
F01_cb7437_c11/f1p0/1869	3
F01_cb10919_c1/f5p2/979	8
F01_cb7475_c4/f2p1/1991	2
F01_cb7477_c3/f1p0/1990	3
F01_cb7499_c4/f2p0/1817	1
F01_cb7499_c5/f2p2/1947	1
F01_cb10952_c0/f17p0/1416	1
F01_cb7501_c12/f2p0/1482	8
F01_cb7507_c7/f1p0/1966	3
F01_cb7523_c0/f1p0/1904	2
F01_cb7527_c3/f1p1/1934	5
F01_cb7543_c1/f1p0/1974	3
F01_cb7545_c7/f1p1/1796	6
F01_cb7600_c10/f51p1/1985	3
F01_cb10952_c15/f7p0/1402	1
F01_cb7603_c0/f8p1/1968	2
F01_cb7605_c15/f1p0/1004	1
F01_cb7622_c46/f45p1/1869	1
F01_cb7623_c3/f1p2/1957	1
F01_cb7623_c9/f1p0/1819	2
F01_cb7658_c4/f1p1/1905	4
F01_cb7683_c2/f4p1/1929	2
F01_cb7685_c5/f1p0/1745	2
F01_cb7731_c0/f4p0/1946	6
F01_cb7739_c15/f1p0/1793	1
F01_cb7739_c21/f1p0/1518	5
F01_cb7755_c23/f1p0/3085	5
F01_cb7757_c19/f1p0/1655	2
F01_cb7757_c6/f3p3/1935	1
F01_cb7779_c6/f1p0/1665	1
F01_cb7802_c12/f1p0/1651	2
F01_cb7818_c9/f1p0/1797	3
F01_cb7823_c32/f115p2/1741	5
F01_cb7835_c4/f1p0/1881	2
F01_cb7836_c5/f1p0/1780	6
F01_cb7845_c1/f1p0/1912	6
F01_cb7864_c6/f2p1/1908	6
F01_cb7874_c15/f1p0/1844	5
F01_cb7905_c14/f1p1/1917	6
F01_cb7906_c3/f1p0/781	3
F01_cb7948_c8/f4p0/1891	5
F01_cb7954_c2/f1p1/1895	6
F01_cb7977_c2/f1p0/1887	2
F01_cb8001_c19/f5p1/1837	1
F01_cb10964_c2/f1p0/1593	6
F01_cb8030_c4/f1p0/2003	5
F01_cb8036_c40/f1p0/1982	7
F01_cb8044_c21/f1p1/1791	5
F01_cb8054_c17/f1p0/1881	3
F01_cb8062_c9/f1p1/1270	5
F01_cb8073_c12/f1p0/1661	1
F01_cb8084_c19/f1p1/1355	6
F01_cb10968_c5/f1p0/1291	7
F01_cb8090_c8/f2p0/1528	6
F01_cb8096_c7/f1p0/1710	3
F01_cb8099_c1/f1p0/1856	3
F01_cb8110_c3/f1p1/1886	6
F01_cb8111_c14/f34p0/933	5
F01_cb8123_c24/f1p1/1855	2
F01_cb8128_c11/f1p0/1841	6
F01_cb8184_c4/f2p3/1842	6
F01_cb8184_c8/f3p0/1835	2
F01_cb8202_c6/f4p0/1836	1
F01_cb8211_c3/f1p0/1429	3
F01_cb8213_c1/f1p0/1836	7
F01_cb11001_c3/f1p0/962	7
F01_cb8223_c5/f1p0/1759	2
F01_cb8232_c2/f1p0/1832	3
F01_cb8240_c9/f1p0/1589	6
F01_cb8287_c6/f1p1/1834	2
F01_cb8288_c0/f2p0/1819	2
F01_cb8294_c5/f1p0/1736	2
F01_cb11011_c15/f44p2/1083	2
F01_cb8302_c6/f1p0/1758	3
F01_cb8321_c16/f1p0/1730	2
F01_cb8331_c15/f1p0/1198	5
F01_cb8347_c0/f5p0/1803	2
F01_cb8358_c32/f1p0/892	3
F01_cb11011_c9/f1p1/1201	7
F01_cb8401_c11/f1p3/1785	1
F01_cb8413_c6/f1p1/1784	2
F01_cb8427_c4/f1p0/1863	6
F01_cb8453_c2/f1p1/1764	2
F01_cb8476_c0/f5p1/1942	3
F01_cb8476_c3/f3p0/1646	3
F01_cb11019_c6/f1p1/1611	8
F01_cb8500_c15/f1p0/1333	3
F01_cb8527_c2/f1p0/1917	1
F01_cb8547_c4/f1p0/1520	2
F01_cb8550_c1/f1p0/1748	2
F01_cb8561_c5/f1p0/1236	2
F01_cb8571_c11/f1p4/1740	6
F01_cb8601_c3/f1p0/1788	2
F01_cb11020_c7/f1p0/1501	3
F01_cb8619_c12/f1p0/1650	1
F01_cb8620_c0/f1p0/1725	1
F01_cb8645_c18/f1p0/1833	2
F01_cb8645_c35/f1p0/1319	7
F01_cb8648_c39/f1p0/1691	1
F01_cb8653_c2/f1p1/1671	2
F01_cb8661_c20/f1p0/1419	1
F01_cb11023_c15/f1p0/1083	6
F01_cb8667_c10/f2p0/1381	6
F01_cb8670_c2/f1p0/1727	1
F01_cb8684_c7/f1p1/1709	3
F01_cb8700_c2/f1p0/1788	6
F01_cb8707_c4/f1p0/1774	3
F01_cb8725_c23/f1p6/1181	6
F01_cb8731_c7/f1p0/1846	4
F01_cb8733_c24/f1p0/1117	3
F01_cb8737_c7/f1p0/1350	5
F01_cb8748_c1/f1p1/2134	1
F01_cb8750_c9/f1p0/1581	2
F01_cb8756_c13/f2p2/1533	2
F01_cb8764_c21/f1p1/1253	1
F01_cb8765_c2/f3p1/1284	8
F01_cb11050_c1/f5p4/1418	3
F01_cb8771_c4/f1p1/1743	8
F01_cb8781_c27/f32p2/1501	6
F01_cb8782_c2/f1p0/1771	8
F01_cb8793_c21/f1p0/1284	5
F01_cb8794_c22/f1p0/1246	5
F01_cb8794_c23/f1p0/1141	5
F01_cb8796_c16/f1p1/1318	2
F01_cb8797_c2/f1p0/1616	1
F01_cb11060_c5/f1p0/644	7
F01_cb8807_c0/f17p0/1592	5
F01_cb8811_c7/f1p1/2680	7
F01_cb8828_c13/f1p0/665	6
F01_cb8830_c5/f1p0/1163	7
F01_cb8832_c15/f1p0/1479	5
F01_cb8834_c6/f1p0/1752	3
F01_cb8862_c6/f1p0/1092	7
F01_cb10191_c17/f1p0/1031	1
F01_cb11062_c1/f1p0/1259	7
F01_cb8888_c2/f2p0/1396	8
F01_cb8889_c1/f1p0/1923	2
F01_cb8903_c6/f1p0/2890	5
F01_cb8910_c7/f1p1/1179	2
F01_cb8917_c7/f1p1/1551	6
F01_cb8963_c7/f1p0/1333	6
F01_cb11069_c14/f1p2/1041	5
F01_cb8980_c3/f1p0/1483	3
F01_cb8983_c9/f1p2/1368	2
F01_cb8996_c11/f1p0/1359	8
F01_cb9024_c3/f1p0/1719	6
F01_cb9030_c4/f1p0/1845	2
F01_cb9033_c3/f1p0/1177	2
F01_cb11076_c4/f1p0/1056	3
F01_cb9042_c6/f1p1/1738	8
F01_cb9078_c1/f1p0/1740	7
F01_cb9081_c2/f11p0/1201	8
F01_cb9118_c1/f1p0/1762	3
F01_cb9124_c6/f1p1/1677	3
F01_cb9126_c2/f1p0/1850	2
F01_cb9135_c5/f5p0/1296	3
F01_cb9148_c3/f6p0/483	7
F01_cb9153_c4/f1p0/1083	5
F01_cb11098_c1/f1p0/625	8
F01_cb9156_c7/f1p0/1540	6
F01_cb9164_c2/f1p1/1791	2
F01_cb9181_c3/f1p0/2001	3
F01_cb9183_c1/f1p0/1760	1
F01_cb9185_c1/f2p0/1370	7
F01_cb9190_c0/f2p0/1145	3
F01_cb9211_c0/f4p0/1201	4
F01_cb9231_c2/f1p0/2244	5
F01_cb9236_c5/f1p0/1326	6
F01_cb9238_c2/f1p0/1813	2
F01_cb9247_c0/f1p1/1643	6
F01_cb9283_c0/f2p0/1263	3
F01_cb9285_c0/f1p0/1650	1
F01_cb9323_c1/f1p0/2070	7
F01_cb9345_c1/f1p1/2236	6
F01_cb9396_c2/f1p0/3359	8
F01_cb11112_c11/f1p0/1564	3
F01_cb9449_c2/f1p2/1845	7
F01_cb9500_c2/f1p0/2084	2
F01_cb9606_c1/f1p0/1775	8
F01_cb9666_c1/f1p0/1834	3
F01_cb9707_c7/f1p0/1203	4
F01_cb9736_c38/f1p0/785	3
F01_cb11126_c144/f1p2/1322	4
F01_cb9785_c15/f1p0/1215	4
F01_cb9790_c6/f1p0/1273	5
F01_cb9798_c364/f1p0/695	8
F01_cb9798_c369/f1p1/1026	8
F01_cb9821_c3/f1p0/1300	7
F01_cb9825_c10/f2p1/1141	6
F01_cb9828_c134/f1p0/1431	2
F01_cb9838_c14/f1p0/821	5
F01_cb11134_c0/f4p1/878	1
F01_cb9865_c13/f1p0/1076	8
F01_cb9895_c3/f1p0/941	3
F01_cb9930_c12/f35p0/1001	3
F01_cb9947_c61/f1p0/1531	1
F01_cb9951_c0/f10p0/1086	7
F01_cb9956_c6/f1p0/1515	6
F01_cb9961_c5/f1p0/993	8
F01_cb9972_c16/f1p1/914	3
F01_cb9994_c8/f1p0/1377	6
F02_cb1000_c11/f1p1/3628	3
F02_cb10002_c21/f1p0/1156	7
F02_cb10014_c3/f2p2/843	6
F02_cb10021_c10/f1p2/1388	4
F02_cb10044_c3/f5p0/1027	8
F02_cb10055_c5/f1p0/1396	8
F01_cb11158_c12/f1p2/1201	6
F02_cb10060_c3/f1p0/955	4
F02_cb10080_c12/f2p0/863	7
F02_cb10080_c32/f8p0/1396	6
F02_cb10118_c6/f1p0/1465	2
F02_cb10132_c32/f1p1/1808	2
F02_cb10139_c7/f1p1/1273	6
F01_cb10213_c8/f1p0/1474	3
F01_cb11168_c17/f1p0/925	5
F02_cb10150_c6/f1p1/1629	6
F02_cb10166_c2/f1p0/1544	2
F02_cb10183_c9/f2p0/917	4
F02_cb10192_c15/f15p3/1511	4
F02_cb10192_c6/f1p1/1279	4
F02_cb10199_c5/f1p0/1294	4
F02_cb10231_c14/f1p6/1792	2
F02_cb10269_c0/f6p0/1001	6
F01_cb11179_c9/f1p1/967	2
F02_cb10300_c8/f3p1/1603	7
F02_cb1035_c9/f1p0/4501	6
F02_cb10390_c2/f1p1/1497	3
F02_cb10464_c4/f5p1/1084	3
F02_cb10466_c0/f14p0/639	8
F02_cb10474_c7/f1p3/1694	2
F02_cb10538_c1/f1p0/1273	4
F02_cb10545_c4/f4p0/1282	2
F02_cb10568_c5/f1p0/1042	3
F02_cb10594_c1/f1p0/1359	8
F02_cb10595_c6/f1p1/1412	5
F02_cb10606_c2/f1p0/1428	8
F01_cb11189_c5/f2p3/1606	6
F02_cb10640_c10/f1p0/1645	2
F02_cb10671_c1/f6p1/1452	3
F02_cb10671_c11/f1p0/1653	8
F02_cb10671_c2/f2p1/1465	4
F02_cb10671_c4/f3p1/1515	5
F02_cb10683_c53/f1p0/1739	6
F02_cb10698_c0/f3p0/1038	3
F02_cb10716_c3/f1p0/1513	2
F02_cb10738_c5/f2p0/1036	8
F02_cb10743_c6/f1p0/1413	3
F02_cb10834_c21/f1p0/1771	7
F02_cb10834_c6/f2p0/1745	1
F02_cb10835_c4/f1p0/1450	8
F02_cb10845_c3/f1p0/809	3
F02_cb10853_c30/f7p0/1629	4
F02_cb10860_c11/f1p4/1752	7
F02_cb10867_c3/f1p1/1494	8
F02_cb10870_c4/f1p0/1151	1
F02_cb10892_c5/f1p0/546	5
F02_cb10923_c1/f4p0/1669	3
F02_cb10926_c6/f1p0/1022	8
F02_cb10968_c6/f5p0/1610	2
F02_cb10984_c2/f2p0/1093	7
F02_cb11003_c7/f1p0/1206	3
F02_cb11013_c13/f1p0/945	3
F02_cb11077_c2/f4p0/655	4
F02_cb11085_c8/f1p1/1547	3
F01_cb11221_c1/f2p0/1462	5
F02_cb11093_c3/f2p0/1684	6
F02_cb11098_c11/f1p0/1538	8
F02_cb1111_c16/f18p0/1732	2
F02_cb11169_c4/f3p0/1199	7
F02_cb11199_c11/f1p0/1232	4
F02_cb112_c11/f1p0/4086	5
F01_cb11222_c12/f1p1/1581	6
F02_cb11244_c4/f1p0/1527	8
F02_cb11266_c14/f1p0/1274	4
F02_cb11266_c19/f1p0/1196	4
F02_cb11281_c5/f1p0/1022	8
F02_cb11289_c0/f11p2/1679	2
F02_cb11307_c8/f1p0/1195	8
F02_cb11341_c19/f1p0/1358	6
F02_cb11381_c0/f4p0/1008	2
F02_cb11455_c3/f1p0/1107	7
F02_cb11458_c1/f1p0/1394	3
F01_cb10225_c37/f1p0/905	8
F01_cb11248_c2/f4p0/1439	3
F02_cb11521_c1/f1p0/933	3
F02_cb11554_c12/f1p0/1782	1
F02_cb11582_c1/f1p0/984	8
F02_cb11645_c3/f1p0/1515	6
F02_cb11648_c2/f1p0/1575	2
F02_cb11655_c2/f1p0/1418	2
F02_cb11701_c11/f1p4/5623	5
F02_cb11712_c8/f1p0/1775	6
F02_cb11717_c1/f2p0/1053	4
F02_cb11728_c3/f1p1/1056	5
F02_cb11735_c4/f1p1/1003	4
F02_cb11753_c1/f1p0/1111	5
F02_cb11754_c2/f1p0/1449	8
F02_cb11759_c1/f1p0/1015	4
F02_cb11761_c7/f1p1/1155	2
F02_cb11764_c12/f2p0/1261	4
F02_cb11771_c4/f1p1/1195	4
F01_cb11289_c9/f1p0/1598	3
F02_cb11802_c3/f1p0/1181	3
F02_cb11820_c8/f2p0/875	8
F02_cb11826_c6/f1p1/1584	3
F02_cb11836_c10/f1p1/1680	8
F02_cb11847_c2/f1p0/468	8
F02_cb11872_c37/f8p3/1713	2
F02_cb11880_c4/f1p0/1062	4
F01_cb11302_c4/f1p0/646	8
F02_cb11888_c0/f1p0/1695	6
F02_cb11919_c3/f1p1/1457	7
F02_cb11920_c3/f1p0/685	3
F02_cb12002_c10/f1p0/1729	2
F02_cb12019_c1/f1p0/1495	8
F02_cb12031_c1/f1p0/1204	5
F01_cb11310_c7/f1p0/864	8
F02_cb12088_c8/f1p0/1358	2
F02_cb12090_c2/f1p0/1482	3
F02_cb12091_c1/f4p0/1229	4
F02_cb12128_c7/f1p1/1336	6
F02_cb12181_c2/f1p0/1374	2
F02_cb12212_c3/f1p0/1469	2
F02_cb12263_c5/f1p0/1328	6
F02_cb12275_c0/f1p0/1062	2
F02_cb12289_c2/f1p0/1196	2
F02_cb12304_c6/f1p1/1195	8
F02_cb12310_c1/f2p0/919	3
F02_cb12313_c5/f1p0/874	1
F02_cb12320_c3/f1p0/1185	4
F02_cb12346_c3/f1p0/1118	8
F01_cb11325_c7/f7p0/607	4
F02_cb12348_c2/f1p0/1242	3
F02_cb12354_c4/f1p0/696	4
F02_cb12354_c7/f1p0/872	3
F02_cb12357_c3/f1p0/1363	8
F02_cb12372_c2/f1p0/1168	6
F02_cb1240_c28/f5p1/3348	3
F02_cb12401_c0/f2p0/1174	3
F01_cb11332_c8/f1p0/867	5
F02_cb12443_c12/f4p0/1252	2
F02_cb12465_c4/f1p1/1453	5
F02_cb12495_c3/f2p1/1556	6
F02_cb12507_c6/f5p1/1585	6
F02_cb12546_c1/f2p1/1065	3
F02_cb12547_c5/f1p0/1798	3
F01_cb11335_c0/f5p0/1102	4
F02_cb12550_c2/f4p0/956	1
F02_cb12550_c3/f4p0/1019	1
F02_cb12550_c5/f2p0/1253	7
F02_cb12576_c2/f1p1/753	5
F02_cb12592_c1/f3p0/1356	2
F02_cb12652_c47/f3p2/860	8
F02_cb12661_c0/f2p0/1627	3
F02_cb12679_c3/f1p0/1811	2
F02_cb12698_c2/f1p0/1773	2
F02_cb12713_c0/f2p0/1736	7
F02_cb12721_c3/f1p1/1534	4
F02_cb12776_c19/f1p0/1020	7
F02_cb12776_c20/f1p1/1270	2
F02_cb12802_c7/f1p0/1009	3
F02_cb12812_c6/f1p0/904	4
F02_cb12813_c11/f1p0/931	3
F02_cb12814_c2/f1p0/1292	8
F02_cb12912_c8/f7p1/1430	2
F02_cb12919_c1/f1p0/778	3
F01_cb11373_c7/f1p0/1603	7
F02_cb1292_c21/f1p0/1639	7
F02_cb12920_c3/f1p0/1793	6
F02_cb12926_c0/f4p0/1443	2
F02_cb12932_c1/f1p0/1236	8
F02_cb12933_c3/f1p0/975	5
F02_cb12966_c3/f1p0/1307	6
F02_cb12972_c5/f1p0/705	5
F01_cb11376_c0/f4p0/747	1
F02_cb12985_c6/f1p0/976	8
F02_cb130_c55/f2p0/2098	3
F02_cb13033_c1/f1p0/847	4
F02_cb1305_c9/f1p4/1576	3
F02_cb13065_c1/f1p0/962	5
F02_cb13072_c3/f1p0/1060	6
F02_cb13087_c3/f1p0/1547	4
F01_cb11384_c4/f1p0/1373	3
F02_cb13103_c2/f1p0/1266	1
F02_cb13157_c2/f1p0/1467	4
F02_cb13171_c3/f1p0/1227	2
F02_cb13197_c0/f4p0/892	8
F02_cb13213_c17/f1p0/698	4
F02_cb13213_c32/f4p1/746	8
F01_cb11399_c0/f2p0/1548	5
F02_cb13243_c27/f1p1/1812	7
F02_cb13243_c65/f1p0/1080	7
F02_cb13282_c21/f1p0/1482	1
F02_cb13295_c1/f2p1/1499	4
F02_cb13304_c1/f2p0/854	5
F02_cb13304_c4/f1p0/1005	8
F01_cb1140_c14/f1p1/1921	2
F02_cb13337_c3/f1p0/1321	7
F02_cb13341_c0/f1p0/1078	2
F02_cb13348_c1/f5p0/1038	4
F02_cb13384_c3/f1p0/1175	8
F02_cb13426_c4/f1p0/1439	8
F02_cb13430_c0/f3p0/1418	4
F02_cb13441_c1/f1p0/1014	2
F02_cb13446_c2/f1p0/1612	4
F01_cb11400_c12/f19p2/658	5
F02_cb1346_c3/f5p2/2509	2
F02_cb13474_c0/f2p0/1014	3
F02_cb13483_c0/f2p0/1088	4
F02_cb13500_c2/f1p1/1214	3
F02_cb13522_c0/f2p0/941	8
F02_cb13535_c9/f1p0/1407	7
F02_cb13563_c3/f2p0/1605	5
F01_cb11400_c13/f3p0/753	5
F02_cb13564_c1/f2p0/816	8
F02_cb13605_c1/f1p2/1822	8
F02_cb13621_c6/f1p2/1713	2
F02_cb13624_c1/f2p1/1294	7
F02_cb13624_c5/f1p1/1529	4
F02_cb13625_c3/f1p0/967	4
F02_cb13631_c6/f1p0/1129	2
F02_cb13633_c2/f1p0/1203	3
F01_cb11400_c6/f1p0/775	3
F02_cb13641_c1/f1p0/1320	2
F02_cb13649_c1/f4p0/1101	1
F02_cb13650_c0/f5p0/1407	4
F02_cb13662_c8/f1p0/1794	6
F02_cb13663_c13/f1p0/1081	8
F02_cb13703_c0/f1p0/1309	4
F01_cb11405_c2/f1p0/1009	5
F02_cb13732_c17/f15p0/1697	6
F02_cb13734_c11/f1p1/1157	6
F02_cb13740_c5/f1p2/1505	3
F02_cb13812_c0/f4p0/860	3
F02_cb13822_c8/f1p0/1315	2
F02_cb13843_c1/f1p0/1640	4
F02_cb13853_c1/f2p0/1581	3
F01_cb11410_c9/f1p1/1089	6
F02_cb13867_c1/f3p0/1656	1
F02_cb13947_c0/f1p0/791	3
F02_cb1401_c13/f1p6/3617	2
F02_cb14040_c4/f1p0/1276	8
F02_cb14052_c1/f1p1/1039	3
F01_cb11418_c2/f2p0/753	8
F02_cb14068_c4/f1p1/1475	4
F02_cb1408_c1/f1p0/3601	7
F02_cb14136_c0/f1p0/1612	2
F02_cb14146_c0/f3p0/899	5
F02_cb14159_c1/f1p0/1238	4
F02_cb14178_c5/f2p0/1267	8
F02_cb1418_c6/f1p0/3249	2
F01_cb11424_c7/f5p0/889	8
F02_cb14188_c1/f2p0/1001	3
F02_cb14212_c7/f1p0/1304	3
F02_cb14232_c0/f4p0/1669	3
F02_cb14268_c5/f1p0/1259	3
F02_cb14280_c1/f1p0/1527	2
F02_cb14285_c0/f1p0/1263	8
F02_cb14315_c0/f2p0/1286	2
F01_cb11435_c7/f1p0/1314	5
F02_cb14336_c1/f1p0/764	4
F02_cb14337_c0/f1p0/1523	2
F02_cb14356_c1/f1p0/1649	8
F02_cb14357_c5/f1p0/1483	3
F02_cb14374_c3/f1p2/1268	8
F02_cb14399_c7/f2p0/1567	7
F02_cb1440_c44/f2p1/3147	6
F02_cb14407_c0/f2p0/1850	6
F01_cb11447_c1/f1p0/1039	7
F02_cb14425_c0/f2p0/716	3
F02_cb14428_c2/f1p1/1692	3
F02_cb14465_c1/f1p0/1059	8
F02_cb14470_c0/f2p0/1390	5
F02_cb14485_c1/f2p0/1631	2
F02_cb14486_c3/f1p1/1466	6
F02_cb14490_c1/f1p0/1107	4
F02_cb14498_c0/f6p0/770	8
F01_cb11452_c4/f1p1/1497	1
F02_cb14596_c2/f1p0/967	7
F02_cb14621_c4/f1p0/1650	1
F02_cb14641_c1/f1p0/1780	3
F02_cb14672_c0/f2p0/1376	3
F02_cb14692_c0/f5p0/1108	6
F01_cb11460_c20/f1p0/1659	6
F02_cb14710_c0/f1p0/796	3
F02_cb14726_c2/f1p0/1409	4
F02_cb14773_c0/f1p0/1013	3
F02_cb14811_c0/f2p1/1547	3
F01_cb11465_c0/f4p0/947	1
F02_cb14814_c1/f2p0/798	3
F02_cb14829_c2/f1p0/835	3
F02_cb14867_c1/f1p0/1477	6
F02_cb149_c35/f1p0/2003	3
F02_cb14900_c4/f1p0/634	4
F02_cb14904_c4/f1p0/1074	3
F02_cb14970_c1/f1p0/905	8
F02_cb15013_c2/f1p0/1211	1
F02_cb15023_c1/f2p0/1367	8
F02_cb15062_c1/f4p0/775	5
F02_cb15086_c2/f2p0/1515	4
F02_cb15101_c0/f13p0/1072	3
F02_cb15152_c0/f1p0/1607	6
F01_cb11468_c44/f6p1/1413	6
F02_cb15152_c1/f1p0/1434	2
F02_cb15158_c0/f1p0/1354	8
F02_cb15214_c1/f1p0/711	8
F02_cb1523_c7/f1p0/3555	3
F02_cb15235_c2/f1p0/1634	5
F02_cb15238_c1/f1p0/1239	6
F02_cb15253_c6/f3p0/1641	2
F02_cb15292_c19/f1p1/1046	1
F01_cb10243_c9/f1p1/1511	2
F01_cb11468_c57/f1p1/1306	2
F02_cb15297_c1/f1p0/1379	8
F02_cb15342_c1/f1p0/1124	7
F02_cb15366_c1/f1p0/1153	8
F02_cb15366_c2/f1p0/1182	3
F02_cb15390_c1/f1p0/1348	2
F02_cb1540_c6/f1p0/4242	2
F02_cb15400_c1/f1p0/1433	6
F02_cb15404_c0/f2p0/1107	8
F01_cb1147_c11/f1p0/3348	2
F02_cb15478_c0/f3p0/1055	3
F02_cb15482_c1/f1p0/1375	5
F02_cb15490_c6/f2p0/1865	7
F02_cb15493_c4/f1p0/1362	3
F02_cb15552_c1/f1p0/1730	4
F02_cb15596_c0/f1p0/705	8
F02_cb15600_c1/f1p0/774	3
F01_cb11473_c1/f2p0/1155	4
F02_cb15607_c1/f1p0/1404	8
F02_cb15619_c1/f1p0/1075	3
F02_cb15626_c4/f1p0/611	7
F02_cb15659_c8/f2p1/1679	3
F02_cb15816_c1/f1p0/1804	6
F01_cb11496_c1/f1p0/944	3
F02_cb15878_c0/f2p0/710	4
F02_cb15889_c0/f1p0/1484	3
F02_cb16000_c1/f1p0/548	5
F02_cb16041_c1/f1p0/1472	4
F02_cb16057_c1/f1p0/1204	3
F02_cb16062_c1/f1p0/1467	3
F02_cb16081_c1/f1p0/1227	3
F01_cb11524_c2/f1p0/1274	2
F02_cb16304_c1/f1p0/564	5
F02_cb16310_c2/f1p0/5626	8
F02_cb1633_c2/f1p0/3517	5
F02_cb1658_c14/f1p1/3482	8
F02_cb1672_c26/f1p0/1475	7
F02_cb1701_c0/f1p0/3489	2
F01_cb11539_c1/f2p0/1483	8
F02_cb177_c28/f1p0/2803	4
F02_cb177_c59/f1p1/3129	3
F02_cb1770_c0/f1p0/3456	3
F02_cb1774_c2/f1p0/3460	3
F02_cb1810_c0/f2p1/2609	6
F02_cb1846_c12/f1p2/3374	5
F02_cb1849_c20/f1p0/1762	2
F01_cb11547_c3/f1p1/1712	3
F02_cb1979_c54/f1p0/1586	3
F02_cb2_c0/f3p0/3163	3
F02_cb2020_c11/f1p2/2033	6
F02_cb2102_c12/f1p1/8113	8
F02_cb2116_c12/f1p1/2670	6
F01_cb11550_c11/f2p3/1476	8
F02_cb2151_c6/f1p0/3403	3
F02_cb2180_c20/f1p1/2349	3
F02_cb2257_c4/f3p0/2380	2
F02_cb2278_c2/f3p0/1375	2
F02_cb2279_c15/f1p1/3281	2
F01_cb11550_c2/f3p1/1568	3
F02_cb2327_c33/f1p0/2953	2
F02_cb2363_c6/f1p0/2896	2
F02_cb2364_c0/f9p1/3252	3
F02_cb2380_c0/f3p0/5513	3
F02_cb2404_c36/f1p0/2281	7
F02_cb2404_c46/f11p1/2935	7
F02_cb242_c31/f2p3/4376	3
F01_cb11551_c2/f2p1/1038	7
F02_cb2524_c17/f1p0/3162	3
F02_cb2554_c14/f5p1/2014	6
F02_cb2557_c2/f1p1/3191	1
F02_cb2565_c53/f1p1/2728	3
F02_cb2593_c41/f1p0/1823	3
F02_cb2593_c61/f12p1/1845	5
F02_cb26_c6/f1p1/3183	6
F01_cb11555_c0/f2p0/1570	7
F02_cb2638_c27/f1p0/1489	5
F02_cb2656_c1/f4p0/927	3
F02_cb2670_c2/f1p0/1613	6
F02_cb2675_c11/f1p1/3076	3
F02_cb2733_c4/f1p0/3017	8
F02_cb2750_c15/f1p0/1772	2
F02_cb2775_c23/f11p2/1288	3
F01_cb11583_c51/f1p0/1511	5
F02_cb2901_c46/f1p0/2871	2
F02_cb2913_c2/f1p0/3426	3
F02_cb2928_c2/f1p0/3047	4
F02_cb3046_c10/f1p1/2835	5
F02_cb3060_c5/f1p0/3018	6
F01_cb11633_c25/f1p4/1349	7
F02_cb3135_c419/f1p0/2143	5
F02_cb3135_c660/f1p0/3485	6
F02_cb3216_c8/f1p0/3313	2
F01_cb11636_c7/f3p0/1468	3
F02_cb3250_c20/f1p0/2877	2
F02_cb3289_c22/f1p0/2300	8
F02_cb329_c1/f3p3/4237	6
F02_cb3312_c0/f1p0/2985	4
F02_cb332_c11/f1p0/3148	2
F02_cb3325_c4/f1p3/2981	6
F02_cb3339_c16/f1p0/2761	6
F02_cb3363_c0/f2p0/2981	1
F01_cb11647_c15/f1p4/1433	6
F02_cb3478_c5/f1p0/2822	2
F02_cb3607_c3/f1p0/3438	3
F02_cb3623_c7/f1p0/2049	7
F02_cb3631_c55/f1p0/2444	3
F02_cb3631_c99/f107p5/1773	4
F02_cb3652_c1/f1p0/2229	2
F02_cb3673_c49/f1p0/2655	2
F02_cb3678_c2/f1p1/2948	6
F02_cb3692_c6/f1p2/3301	6
F02_cb3706_c11/f2p0/2105	2
F02_cb3729_c36/f1p0/2640	4
F01_cb11661_c7/f1p0/1283	3
F02_cb3811_c16/f1p1/2556	6
F02_cb3916_c5/f1p0/2321	8
F02_cb3955_c15/f1p0/2688	2
F02_cb3956_c28/f1p0/1923	6
F02_cb4068_c24/f1p0/2687	3
F02_cb4088_c2/f1p0/3046	2
F02_cb4100_c17/f1p0/2592	5
F02_cb4116_c2/f1p0/2841	1
F02_cb4146_c0/f1p0/2756	7
F02_cb4183_c5/f2p1/2737	6
F02_cb4194_c27/f1p0/1735	3
F02_cb4198_c17/f1p1/2646	7
F02_cb4285_c5/f1p1/1578	3
F02_cb4314_c7/f1p0/2288	4
F01_cb11671_c3/f4p0/899	4
F02_cb4385_c7147/f1p3/1067	6
F02_cb4418_c13/f1p0/2413	3
F02_cb4496_c22/f1p0/2492	2
F02_cb4525_c6/f1p1/2414	3
F01_cb11683_c3/f1p0/1557	8
F02_cb4534_c0/f2p0/2564	7
F02_cb4598_c3/f1p0/2653	7
F02_cb4602_c19/f1p1/2345	6
F02_cb4636_c9/f1p0/2643	8
F02_cb4712_c4/f1p2/2576	5
F02_cb475_c35/f1p0/2043	2
F02_cb4776_c4/f1p1/2526	2
F02_cb4780_c3/f1p0/2388	2
F01_cb11689_c7/f1p0/923	3
F02_cb4809_c13/f1p0/2531	6
F02_cb4934_c24/f1p0/2072	3
F02_cb5001_c2/f1p0/2557	6
F02_cb5056_c2/f1p0/2538	2
F02_cb5062_c24/f1p0/2166	7
F02_cb5070_c1/f1p0/2542	3
F01_cb11697_c3/f1p1/1065	3
F02_cb5108_c56/f1p1/2032	8
F02_cb513_c18/f1p0/3819	2
F02_cb5142_c7/f4p0/1756	8
F02_cb5162_c6/f6p1/1825	2
F02_cb5162_c94/f1p2/2629	7
F02_cb5169_c28/f9p2/2426	6
F02_cb5195_c4/f1p1/2212	3
F01_cb11701_c4/f1p0/947	3
F02_cb5214_c436/f1p0/1706	8
F02_cb5226_c7/f4p0/2531	3
F02_cb5248_c90/f1p0/1041	5
F02_cb5289_c6/f1p0/2225	2
F02_cb529_c10/f1p1/3948	3
F02_cb5329_c11/f1p0/2518	2
F02_cb5329_c7/f5p1/2204	6
F02_cb5338_c9/f1p1/2259	3
F02_cb5389_c24/f1p2/2457	8
F02_cb5395_c13/f35p3/2339	2
F02_cb5396_c5/f1p3/2471	6
F02_cb541_c7/f1p1/3719	4
F02_cb5460_c5/f4p0/2457	6
F02_cb5463_c99/f1p3/2123	3
F01_cb11706_c3/f5p1/954	5
F02_cb5479_c23/f2p0/2221	2
F02_cb5508_c83/f1p0/1948	2
F02_cb5513_c21/f1p0/1452	7
F02_cb554_c4/f1p1/3945	7
F02_cb5551_c0/f7p1/2186	8
F02_cb5551_c5/f1p0/2163	8
F02_cb5577_c27/f1p2/2073	2
F02_cb5589_c9/f1p1/2411	6
F01_cb11709_c5/f1p1/1006	2
F02_cb559_c34/f1p3/3894	2
F02_cb5592_c3/f1p0/2431	7
F02_cb5608_c1/f15p1/2431	2
F02_cb5642_c26/f1p0/2208	4
F02_cb5679_c2/f2p0/2190	7
F01_cb11711_c17/f1p0/706	3
F02_cb5726_c24/f1p0/2338	2
F02_cb5781_c40/f4p3/2359	7
F02_cb5800_c8/f1p0/2555	7
F02_cb5827_c1/f1p0/2380	2
F02_cb5917_c9/f1p0/2144	6
F02_cb5955_c4/f1p0/2357	2
F01_cb11723_c0/f1p0/1447	5
F02_cb6022_c10/f1p0/2020	5
F02_cb6027_c26/f1p0/1392	4
F02_cb6035_c10/f1p1/2039	6
F02_cb6079_c40/f1p0/2692	3
F02_cb6090_c16/f1p0/1788	7
F01_cb11730_c0/f4p0/643	8
F02_cb6106_c6/f1p2/2331	2
F02_cb6108_c46/f1p2/3408	2
F02_cb6115_c9/f2p1/2258	2
F02_cb6123_c17/f1p1/2311	3
F02_cb6129_c2/f1p0/2324	6
F02_cb6130_c4/f5p1/1921	8
F02_cb6149_c1/f1p0/2245	8
F02_cb6151_c12/f1p0/2133	7
F01_cb11739_c12/f8p0/536	8
F02_cb6227_c1/f1p0/2348	1
F02_cb6229_c15/f1p0/2075	7
F02_cb6247_c11/f1p0/2313	6
F02_cb6292_c4/f1p0/2377	2
F02_cb6348_c5/f1p0/1472	2
F02_cb6362_c5/f1p1/2140	2
F01_cb10014_c24/f3p1/1535	3
F01_cb10262_c2/f1p0/1598	8
F02_cb6364_c13/f1p2/2058	2
F02_cb6391_c1/f3p3/2208	2
F02_cb6402_c8/f3p0/2264	2
F02_cb6441_c3/f1p0/2019	2
F02_cb6449_c2/f1p0/2181	6
F02_cb6494_c2/f1p0/2252	2
F02_cb6498_c188/f38p2/2041	5
F02_cb650_c30/f3p0/3284	5
F02_cb6525_c0/f4p0/2246	6
F02_cb6539_c0/f2p1/2240	2
F02_cb6582_c48/f1p0/1633	4
F02_cb6593_c18/f1p1/2283	4
F02_cb661_c10/f1p0/2294	3
F02_cb6640_c3/f1p0/2247	3
F02_cb6643_c9/f1p0/1979	8
F02_cb6692_c9/f1p1/2155	8
F02_cb6695_c10/f1p0/1778	2
F02_cb67_c13/f1p0/4267	6
F02_cb6731_c2/f1p0/1953	2
F01_cb11777_c0/f1p0/1093	3
F02_cb6753_c3/f1p0/2202	7
F02_cb6780_c24/f1p0/2144	2
F02_cb6831_c3/f3p1/1977	8
F02_cb685_c4/f1p0/4281	6
F02_cb6861_c20/f1p1/1740	2
F01_cb11780_c1/f2p0/1076	8
F02_cb6923_c1/f1p0/2314	8
F02_cb6930_c7/f3p0/2169	6
F02_cb6937_c11/f1p0/2169	2
F02_cb6949_c8/f1p0/2288	6
F02_cb6963_c1/f1p0/2167	2
F02_cb7001_c3/f5p0/2064	5
F02_cb7010_c3/f1p2/2151	3
F02_cb7015_c10/f1p0/1922	4
F02_cb7060_c29/f1p1/1988	4
F02_cb7097_c1/f1p0/2125	2
F02_cb7114_c3/f8p0/1985	4
F01_cb11796_c0/f3p0/1365	6
F02_cb717_c35/f1p3/5478	2
F02_cb7170_c7/f1p0/2064	2
F02_cb7171_c0/f2p0/2124	1
F02_cb7189_c5/f1p0/2149	2
F02_cb7211_c0/f1p0/2165	4
F02_cb7239_c35/f2p2/1780	6
F01_cb11799_c2/f2p0/1167	6
F02_cb7285_c11/f2p1/1815	6
F02_cb7310_c23/f13p1/2027	4
F02_cb7324_c1/f1p0/1938	8
F02_cb7390_c5/f1p0/1846	5
F02_cb7406_c12/f1p0/1952	2
F02_cb7417_c23/f1p0/986	5
F02_cb7434_c7/f1p1/2063	2
F02_cb7441_c2/f1p0/1992	2
F02_cb7481_c3/f1p0/1932	6
F02_cb7482_c0/f3p0/2064	3
F02_cb7510_c10/f1p0/1877	2
F01_cb11820_c0/f37p5/1153	1
F02_cb7547_c9/f1p0/1926	2
F02_cb7564_c3/f1p0/2048	5
F02_cb7604_c7/f1p0/2048	2
F02_cb7625_c9/f1p0/2161	3
F02_cb7635_c4/f1p0/2370	2
F02_cb7658_c3/f1p0/2091	8
F02_cb7666_c2/f1p0/2004	2
F02_cb7669_c4/f5p1/1896	6
F02_cb7672_c11/f1p0/1914	8
F02_cb769_c6/f1p2/3669	2
F02_cb7692_c1/f1p0/2058	6
F02_cb7720_c2/f1p0/1837	5
F02_cb7755_c0/f11p1/2010	2
F02_cb7766_c15/f1p0/948	8
F02_cb7775_c10/f1p0/1635	8
F02_cb7822_c5/f2p0/1787	8
F02_cb785_c12/f1p0/3483	8
F02_cb7859_c31/f36p6/2185	6
F02_cb7865_c5/f1p1/1829	5
F02_cb7866_c11/f1p2/2155	1
F02_cb7869_c16/f1p1/1984	5
F01_cb11846_c4/f1p0/1653	8
F02_cb7871_c2/f1p1/1911	2
F02_cb7914_c13/f1p0/1958	2
F02_cb7942_c1/f1p0/1970	2
F02_cb7973_c4/f1p1/1858	5
F02_cb7986_c104/f1p0/1334	8
F02_cb7986_c35/f1p1/1982	8
F02_cb7988_c2/f1p0/1958	3
F02_cb7997_c11/f1p0/1751	6
F02_cb7997_c8/f2p1/1846	6
F02_cb8003_c5/f1p0/1587	3
F02_cb8038_c0/f4p0/1947	3
F02_cb8052_c5/f1p0/2260	2
F02_cb8071_c2/f1p0/1955	8
F02_cb8086_c11/f4p0/1942	6
F02_cb8094_c32/f1p3/1528	8
F01_cb11853_c4/f1p0/1285	5
F02_cb8123_c14/f9p0/1777	2
F02_cb8129_c5/f1p0/1955	3
F02_cb814_c4/f1p0/3190	7
F02_cb8149_c4/f1p0/1795	6
F02_cb8198_c8/f1p1/1825	2
F02_cb8201_c411/f1p0/3173	3
F02_cb8203_c7/f1p1/1880	2
F02_cb8205_c3/f2p0/1905	4
F02_cb8216_c2/f1p0/2160	2
F02_cb8217_c23/f1p0/1754	2
F02_cb8236_c12/f1p0/1906	6
F02_cb8248_c3/f1p0/1893	3
F02_cb8251_c10/f1p0/926	4
F02_cb8253_c7/f1p0/1802	2
F02_cb8256_c84/f1p3/1766	7
F02_cb8264_c10/f1p0/2050	5
F01_cb11859_c6/f1p0/1005	3
F02_cb8264_c13/f1p0/1864	5
F02_cb8264_c9/f1p0/2144	1
F02_cb8284_c1/f1p0/1880	8
F02_cb8300_c1/f2p1/1912	5
F02_cb8309_c3/f2p0/1906	6
F02_cb8317_c37/f1p0/1170	3
F02_cb8346_c1/f1p0/1825	6
F02_cb8400_c51/f1p1/1185	3
F02_cb8404_c0/f2p0/1730	6
F02_cb8406_c27/f1p0/1403	2
F02_cb8412_c30/f1p3/1514	2
F02_cb8436_c11/f8p0/1386	8
F02_cb8442_c5/f3p0/1465	2
F02_cb8446_c0/f4p0/1715	3
F02_cb8446_c1/f3p0/1754	3
F02_cb8463_c3/f2p1/1729	3
F02_cb8503_c15/f1p1/1788	6
F02_cb8523_c6/f1p2/1722	2
F02_cb8531_c3/f1p0/2111	8
F02_cb8539_c4/f1p1/1974	4
F02_cb8544_c9/f1p2/1734	7
F02_cb8561_c10/f1p0/1593	6
F02_cb8564_c1/f1p0/2255	3
F01_cb11879_c3/f1p0/1616	3
F02_cb8583_c23/f7p1/1122	2
F02_cb8583_c9/f1p0/1007	7
F02_cb8586_c10/f1p0/1566	7
F02_cb8602_c0/f3p0/1803	3
F02_cb8610_c1/f1p0/3191	8
F02_cb8619_c3/f1p1/1913	2
F02_cb8622_c9/f1p1/1112	4
F01_cb10295_c0/f2p0/1491	2
F02_cb8648_c1/f1p0/2186	8
F02_cb8683_c11/f1p0/1594	2
F02_cb8696_c7/f12p2/1434	5
F02_cb8698_c4/f1p0/1697	3
F02_cb8699_c4/f1p0/984	3
F02_cb8700_c0/f2p0/1564	7
F02_cb8704_c3/f3p0/1401	7
F02_cb8712_c7/f1p0/1405	2
F01_cb11889_c1/f2p0/712	4
F02_cb8729_c1/f2p0/1198	4
F02_cb8736_c4/f1p0/1559	4
F02_cb8754_c0/f3p0/1143	8
F02_cb8781_c6/f1p0/1785	2
F02_cb8790_c3/f2p0/1328	5
F02_cb8915_c1/f1p0/1901	8
F02_cb8933_c6/f1p0/780	3
F02_cb8970_c15/f1p1/461	5
F02_cb8973_c7/f1p0/1228	8
F01_cb11937_c1/f3p0/918	3
F02_cb8982_c3/f1p0/1050	5
F02_cb9026_c2/f1p0/1396	8
F02_cb9130_c1/f1p0/1904	1
F02_cb9177_c2/f1p0/1527	2
F02_cb9257_c1/f1p0/1948	8
F02_cb9293_c11/f1p0/1258	5
F01_cb11941_c2/f1p0/1345	4
F02_cb9329_c13/f1p0/1582	6
F02_cb9342_c1/f3p0/897	8
F02_cb9353_c9/f1p2/1553	5
F02_cb9366_c4/f1p0/1820	1
F02_cb9389_c126/f1p1/933	4
F02_cb9456_c17/f2p1/1711	6
F02_cb9467_c4/f4p2/1535	5
F02_cb9471_c58/f1p7/1859	7
F02_cb951_c17/f1p0/3784	6
F02_cb9525_c15/f1p0/1040	3
F01_cb11992_c7/f1p0/1271	4
F02_cb9536_c4/f2p0/1496	8
F02_cb9564_c11/f35p4/1809	8
F02_cb9569_c21/f2p1/1588	2
F02_cb9569_c22/f2p2/1387	2
F02_cb9569_c9/f8p1/1395	7
F02_cb9572_c1/f5p0/1298	8
F02_cb9585_c1/f1p0/1153	8
F02_cb9589_c39/f1p1/1115	4
F01_cb11993_c2/f1p0/1124	5
F02_cb9707_c10/f1p0/1534	8
F02_cb9713_c10/f3p0/790	4
F02_cb9723_c21/f7p3/1664	3
F02_cb9732_c1/f1p0/1081	3
F02_cb9735_c100349/f8p7/3792	2
F02_cb9735_c100656/f9p2/2360	2
F02_cb9735_c101669/f2p0/1954	2
F02_cb9735_c120070/f3p2/2004	7
F02_cb9735_c148292/f2p1/2048	2
F02_cb9735_c148826/f3p2/2482	6
F02_cb9735_c15873/f1p1/3385	4
F02_cb9735_c17372/f1p0/2785	8
F02_cb9735_c17470/f3p2/2395	6
F02_cb9735_c200587/f1p1/1951	1
F02_cb9735_c210691/f1p2/2835	3
F02_cb9735_c21923/f1p5/3654	7
F02_cb9735_c2428/f6p3/2667	4
F02_cb9735_c28336/f1p0/3744	8
F01_cb10323_c13/f12p0/1173	3
F01_cb12043_c7/f1p0/1245	3
F02_cb9735_c60810/f2p0/2562	3
F02_cb9735_c66113/f1p0/3128	1
F02_cb9735_c684/f4p0/2383	8
F02_cb9735_c71744/f1p0/2744	2
F02_cb9735_c76734/f1p0/2321	5
F02_cb9735_c9030/f4p2/2792	6
F02_cb9755_c1/f2p0/847	3
F02_cb9765_c1/f1p0/1285	2
F01_cb12046_c10/f1p0/1004	6
F02_cb9768_c11/f1p0/799	5
F02_cb9844_c8/f1p0/1092	6
F02_cb9855_c8/f72p1/905	3
F02_cb9872_c6/f1p1/1832	6
F02_cb9877_c8/f1p2/910	3
F02_cb9921_c659/f1p0/1166	2
F02_cb9929_c9/f1p0/1843	2
F02_cb9938_c11/f36p3/1402	2
F02_cb9943_c8/f1p0/1526	8
F01_cb12050_c16/f5p0/913	3
F02_cb996_c5/f1p1/2837	8
F02_cb9970_c3/f10p0/1304	2
F02_cb9971_c11/f1p0/1876	1
F02_cb9986_c2/f1p0/1126	3
F02_cb9995_c0/f2p0/1708	4
F01_cb12061_c7/f13p0/1049	8
F01_cb12070_c0/f4p0/771	6
F01_cb12072_c6/f1p0/1508	7
F01_cb12095_c1/f1p0/818	4
F01_cb12132_c0/f3p0/1275	8
F01_cb12173_c1/f1p0/1141	2
F01_cb12181_c12/f1p0/1664	1
F01_cb12199_c5/f1p1/1009	3
F01_cb12214_c1/f2p0/1216	6
F01_cb12235_c11/f1p1/638	7
F01_cb12244_c0/f2p1/1323	3
F01_cb12246_c24/f4p1/1643	2
F01_cb12260_c3/f1p0/1313	3
F01_cb12271_c4/f2p0/1156	8
F01_cb10357_c51/f1p0/796	5
F01_cb12289_c1/f2p1/1504	8
F01_cb12338_c0/f3p0/858	8
F01_cb12382_c1/f1p0/657	8
F01_cb12400_c1/f4p0/627	8
F01_cb12413_c1/f1p0/1689	5
F01_cb12428_c2/f1p0/1309	3
F01_cb10396_c14/f1p0/1288	1
F01_cb12456_c8/f9p1/1034	3
F01_cb12475_c6/f2p0/1071	1
F01_cb12481_c5/f1p1/1607	2
F01_cb12485_c3/f1p0/1650	1
F01_cb12508_c0/f2p0/1092	3
F01_cb12520_c1/f2p0/885	5
F01_cb12536_c1/f1p0/1007	8
F01_cb12547_c11/f3p1/1038	3
F01_cb12561_c4/f1p0/817	7
F01_cb12566_c0/f6p1/882	4
F01_cb12574_c6/f1p1/950	8
F01_cb12598_c6/f1p0/1478	6
F01_cb12604_c37/f1p1/1343	2
F01_cb12604_c48/f3p0/1085	7
F01_cb12615_c2/f1p0/1299	2
F01_cb12622_c0/f5p0/633	4
F01_cb12623_c0/f2p0/1484	3
F01_cb12653_c6/f1p0/1068	2
F01_cb12694_c10/f1p0/954	4
F01_cb12710_c1/f1p0/975	8
F01_cb12715_c27/f1p0/1205	5
F01_cb12715_c4/f4p1/1246	5
F01_cb12750_c3/f2p2/1148	5
F01_cb10424_c1/f1p0/807	5
F01_cb12769_c0/f4p0/1149	1
F01_cb12772_c2/f2p0/573	8
F01_cb12808_c3/f1p0/1202	4
F01_cb12835_c7/f1p0/572	6
F01_cb12871_c0/f3p1/1036	2
F01_cb12881_c3/f1p0/756	8
F01_cb10021_c4/f1p0/1372	8
F01_cb10443_c3/f2p0/857	8
F01_cb12936_c0/f4p0/1091	3
F01_cb12946_c5/f1p0/1508	3
F01_cb12982_c5/f1p0/702	8
F01_cb12994_c6/f1p0/1013	1
F01_cb13009_c0/f4p0/1583	3
F01_cb10445_c13/f1p0/814	8
F01_cb13025_c8/f1p0/1324	2
F01_cb13036_c7/f1p0/947	8
F01_cb13056_c0/f2p0/935	6
F01_cb13065_c0/f14p0/790	4
F01_cb13086_c2/f1p1/926	8
F01_cb13088_c2/f1p0/625	8
F01_cb10448_c5/f3p1/1280	7
F01_cb13104_c0/f1p0/1091	3
F01_cb13131_c2/f1p0/942	5
F01_cb13160_c5/f1p0/900	5
F01_cb13167_c2/f1p0/863	8
F01_cb13194_c1/f1p0/899	8
F01_cb13203_c11/f4p0/1198	1
F01_cb13203_c4/f1p0/1030	3
F01_cb10451_c22/f1p0/925	8
F01_cb13226_c6/f1p0/1061	4
F01_cb13241_c6/f1p1/1000	5
F01_cb13248_c1/f1p0/1271	8
F01_cb13274_c1/f1p0/706	3
F01_cb13287_c13/f1p0/966	3
F01_cb13289_c4/f1p0/1186	2
F01_cb13292_c7/f1p0/1353	7
F01_cb10493_c8/f1p4/1379	2
F01_cb13310_c2/f1p1/1361	6
F01_cb13318_c3/f1p0/698	4
F01_cb13332_c3/f1p0/1584	2
F01_cb13343_c1/f3p0/1614	8
F01_cb10496_c6/f1p1/1653	6
F01_cb13350_c13/f9p3/1161	6
F01_cb13374_c0/f8p1/1053	8
F01_cb13386_c5/f1p3/874	4
F01_cb10502_c181/f1p4/822	4
F01_cb13469_c0/f3p0/1445	2
F01_cb13471_c5/f1p0/976	8
F01_cb13494_c6/f1p1/883	8
F01_cb13500_c6/f1p0/1076	3
F01_cb13503_c1/f3p1/1371	2
F01_cb13503_c4/f1p0/756	2
F01_cb13508_c0/f24p2/657	7
F01_cb1352_c3/f1p0/3269	1
F01_cb10502_c232/f2p2/927	1
F01_cb13534_c0/f1p0/1680	6
F01_cb13535_c3/f1p0/934	8
F01_cb13536_c3/f1p0/888	8
F01_cb13542_c2/f1p0/1426	6
F01_cb13543_c0/f3p2/1629	8
F01_cb13557_c1/f1p0/966	3
F01_cb13577_c5/f1p0/488	5
F01_cb13586_c7/f15p0/650	8
F01_cb10504_c2/f1p1/852	3
F01_cb13594_c37/f1p0/867	7
F01_cb13614_c0/f5p0/831	8
F01_cb13622_c0/f1p0/1108	3
F01_cb13634_c1/f3p0/781	3
F01_cb13663_c0/f1p0/1476	8
F01_cb13674_c5/f1p0/847	3
F01_cb13698_c1/f1p0/1078	7
F01_cb13729_c9/f1p0/1632	1
F01_cb10505_c26/f1p0/1406	2
F01_cb13759_c0/f3p0/1206	8
F01_cb1376_c22/f1p0/1461	2
F01_cb13776_c3/f1p3/1195	3
F01_cb13780_c4/f1p0/1132	5
F01_cb13820_c2/f1p0/1529	4
F01_cb13824_c7/f8p1/1572	6
F01_cb13828_c1/f1p0/1206	8
F01_cb13840_c5/f1p1/1571	4
F01_cb10505_c3/f3p0/1576	2
F01_cb13841_c6/f1p1/711	7
F01_cb13859_c3/f1p0/1507	6
F01_cb13872_c1/f2p0/1049	6
F01_cb13883_c2/f1p0/828	8
F01_cb13892_c2/f2p1/1450	5
F01_cb13911_c2/f1p0/660	8
F01_cb13912_c3/f1p0/1699	1
F01_cb13914_c2/f1p0/1367	2
F01_cb13919_c0/f4p0/1256	8
F01_cb13940_c6/f1p0/1536	2
F01_cb13954_c5/f1p0/1186	8
F01_cb13971_c1/f1p0/1384	6
F01_cb13976_c1/f1p0/1389	2
F01_cb13977_c11/f1p1/1697	2
F01_cb13992_c5/f1p0/1291	3
F01_cb10515_c7/f1p0/1572	8
F01_cb14020_c243/f1p0/2095	6
F01_cb14039_c3989/f1p3/1074	2
F01_cb14039_c4029/f1p0/1475	6
F01_cb14039_c4107/f1p0/1419	6
F01_cb14039_c424/f10p1/1013	6
F01_cb14039_c4982/f4p1/903	8
F01_cb14039_c5036/f2p0/1125	2
F01_cb14053_c1/f1p0/1115	2
F01_cb14056_c3/f1p0/768	5
F01_cb14086_c2/f1p0/1148	2
F01_cb14090_c9/f9p0/987	3
F01_cb14096_c0/f23p1/715	8
F01_cb141_c2/f16p1/3506	1
F01_cb14101_c0/f4p0/1173	1
F01_cb14131_c2/f1p0/1295	8
F01_cb14243_c8/f1p0/804	3
F01_cb14244_c11/f8p2/1064	5
F01_cb10533_c2/f3p0/1475	2
F01_cb14266_c2/f6p3/1038	8
F01_cb14271_c0/f2p0/1237	5
F01_cb14274_c0/f1p0/1311	8
F01_cb14274_c7/f9p0/1332	1
F01_cb14282_c0/f2p0/762	5
F01_cb14298_c0/f1p0/796	3
F01_cb14310_c9/f3p1/643	1
F01_cb14319_c6/f1p2/1141	2
F01_cb14320_c2/f1p0/655	8
F01_cb10533_c5/f2p0/1590	2
F01_cb14324_c1/f1p0/1248	4
F01_cb14353_c5/f1p0/1091	7
F01_cb14376_c4/f1p0/477	4
F01_cb14416_c6/f1p1/1400	3
F01_cb14441_c5/f1p0/464	3
F01_cb14444_c9/f1p1/1700	1
F01_cb1056_c12/f1p0/2979	5
F01_cb14464_c27/f1p0/801	5
F01_cb14465_c1/f1p0/1200	5
F01_cb14486_c24/f16p0/899	6
F01_cb14489_c0/f1p0/989	8
F01_cb14494_c5/f5p1/862	3
F01_cb14517_c0/f1p0/1262	7
F01_cb10566_c2/f1p1/1085	6
F01_cb14573_c0/f1p1/1200	8
F01_cb14577_c2/f3p0/1558	1
F01_cb14583_c3/f1p0/1262	8
F01_cb14591_c4/f2p0/725	3
F01_cb14594_c0/f1p0/675	5
F01_cb14618_c4/f1p0/897	3
F01_cb14635_c16/f6p1/1280	7
F01_cb14671_c1/f1p0/1341	3
F01_cb14680_c0/f37p2/1213	1
F01_cb14706_c1/f1p0/618	6
F01_cb14707_c0/f4p0/637	1
F01_cb14713_c2/f1p0/1258	8
F01_cb10067_c1/f4p1/1506	2
F01_cb10586_c19/f1p0/724	8
F01_cb14753_c6/f1p0/1447	6
F01_cb14759_c1/f3p1/988	1
F01_cb14770_c0/f2p0/722	6
F01_cb14774_c1/f1p0/1041	3
F01_cb10586_c8/f4p0/889	1
F01_cb14821_c6/f1p0/735	5
F01_cb14825_c0/f2p0/625	3
F01_cb14864_c2/f1p0/495	4
F01_cb1487_c31/f1p0/1744	1
F01_cb14886_c0/f2p0/668	5
F01_cb14917_c0/f1p1/1612	6
F01_cb14928_c1/f1p1/1407	8
F01_cb10590_c19/f1p0/1137	6
F01_cb14943_c275/f1p0/2533	6
F01_cb14945_c1/f1p0/1376	3
F01_cb14971_c2/f1p0/1152	3
F01_cb14987_c9/f8p1/1111	8
F01_cb15003_c0/f1p0/1528	7
F01_cb15028_c0/f1p0/1379	3
F01_cb10591_c10/f1p3/1165	1
F01_cb15051_c1/f1p0/1568	8
F01_cb15052_c2/f1p0/894	3
F01_cb15061_c2/f1p0/1026	3
F01_cb15069_c1/f1p1/1241	5
F01_cb15082_c0/f2p0/1253	6
F01_cb15089_c3/f1p0/1559	8
F01_cb15106_c2/f1p0/1098	3
F01_cb15159_c1/f1p0/1509	3
F01_cb10591_c12/f1p0/888	8
F01_cb15167_c54/f1p1/3038	6
F01_cb15172_c0/f1p0/1106	4
F01_cb15203_c0/f1p0/975	3
F01_cb15203_c2/f1p0/895	5
F01_cb15213_c2/f1p0/565	5
F01_cb15220_c2/f1p0/1111	8
F01_cb10591_c22/f1p0/1224	4
F01_cb15276_c0/f4p1/981	3
F01_cb15308_c7/f1p0/1128	4
F01_cb15346_c1/f1p0/869	3
F01_cb15360_c2/f2p0/834	3
F01_cb15367_c0/f2p0/1456	8
F01_cb10608_c12/f2p0/1359	5
F01_cb15404_c1/f1p0/1490	2
F01_cb15405_c0/f1p0/501	6
F01_cb15410_c0/f1p1/1439	5
F01_cb15443_c1/f1p1/1198	3
F01_cb15447_c1/f1p1/1475	2
F01_cb15471_c8/f1p0/794	3
F01_cb10608_c3/f1p1/1307	8
F01_cb15474_c1/f1p0/1095	2
F01_cb15488_c0/f1p0/1453	5
F01_cb15490_c1/f1p0/902	3
F01_cb15507_c1/f1p0/1073	8
F01_cb15522_c11/f4p0/936	7
F01_cb10610_c12/f1p1/1623	1
F01_cb15530_c0/f4p1/879	3
F01_cb15543_c0/f3p0/1353	5
F01_cb15549_c17/f1p0/1597	1
F01_cb15604_c2/f2p0/1000	1
F01_cb15608_c0/f3p0/870	5
F01_cb15698_c1/f1p0/734	4
F01_cb15717_c1/f1p2/1487	3
F01_cb15729_c3/f2p0/1137	3
F01_cb15734_c1/f2p0/1002	3
F01_cb15778_c5/f3p0/919	6
F01_cb15785_c0/f1p0/986	4
F01_cb15801_c0/f1p2/1178	8
F01_cb15835_c0/f1p0/935	8
F01_cb15841_c1/f1p0/1364	6
F01_cb15870_c1/f1p0/796	8
F01_cb15886_c1/f1p1/1683	3
F01_cb10626_c11/f1p0/753	6
F01_cb15903_c0/f2p0/1300	3
F01_cb15966_c0/f1p0/899	1
F01_cb16003_c1/f1p0/1049	3
F01_cb16010_c0/f2p0/1498	8
F01_cb16014_c1/f1p0/623	2
F01_cb16083_c1/f1p0/819	2
F01_cb164_c59/f1p0/2869	6
F01_cb10630_c23/f2p8/1450	6
F01_cb1678_c1/f1p2/3174	2
F01_cb1740_c6/f1p0/1726	2
F01_cb1786_c20/f1p0/1885	4
F01_cb18_c2/f5p4/3663	3
F01_cb1841_c1/f2p0/3100	8
F01_cb1891_c4/f1p1/2792	1
F01_cb1935_c12/f3p0/2261	6
F01_cb1952_c6/f1p1/2947	6
F01_cb2007_c4/f1p1/1879	6
F01_cb2008_c5/f1p0/1932	6
F01_cb2014_c12/f1p0/2597	6
F01_cb2014_c19/f1p1/2125	6
F01_cb2029_c32/f1p1/2772	5
F01_cb2050_c9/f1p1/1956	2
F01_cb2073_c12/f1p0/2699	6
F01_cb2151_c21/f1p0/2292	8
F01_cb2201_c11/f1p3/2946	3
F01_cb2234_c22/f1p6/2066	6
F01_cb2246_c19/f1p1/1549	1
F01_cb2254_c22/f1p0/2717	2
F01_cb2285_c26/f3p3/2265	6
F01_cb2327_c8/f2p1/2721	3
F01_cb10657_c134/f5p0/1027	5
F01_cb2364_c15/f1p0/3046	2
F01_cb2370_c12/f1p0/1701	6
F01_cb2421_c2/f1p0/2987	3
F01_cb2612_c39/f1p0/2932	3
F01_cb2629_c0/f4p1/2808	3
F01_cb2635_c10/f1p1/1955	2
F01_cb2671_c11/f1p0/2933	5
F01_cb2673_c5/f1p0/1963	1
F01_cb2773_c13/f1p1/2711	2
F01_cb280_c3/f1p0/3305	5
F01_cb2810_c11/f1p0/2412	6
F01_cb2815_c167/f1p9/2865	6
F01_cb2815_c66/f2p0/2424	3
F01_cb10676_c10/f3p0/910	5
F01_cb2918_c11/f1p0/3076	3
F01_cb3017_c13/f1p0/1978	6
F01_cb3126_c48/f1p0/2916	5
F01_cb10676_c9/f1p1/868	3
F01_cb3231_c12/f1p1/2505	1
F01_cb3244_c6/f1p0/2800	6
F01_cb3253_c1/f1p0/2619	1
F01_cb33_c57/f1p0/1792	6
F01_cb33_c78/f1p0/1822	1
F01_cb3335_c6/f1p0/2703	3
F01_cb10685_c3/f1p0/1396	6
F01_cb3348_c1/f1p1/2654	2
F01_cb3356_c0/f1p0/2776	5
F01_cb3406_c0/f12p1/2579	2
F01_cb3424_c7/f5p0/1794	1
F01_cb3468_c4/f1p0/2075	3
F01_cb10696_c11/f1p2/1361	5
F01_cb3601_c53/f1p0/1212	4
F01_cb3601_c77/f2p1/1385	3
F01_cb362_c70/f1p0/1957	3
F01_cb3744_c13/f1p1/2683	6
F01_cb3754_c5/f1p0/2666	6
F01_cb3773_c12/f4p0/2389	1
F01_cb3773_c40/f1p0/2593	7
F01_cb3788_c6/f1p1/3390	3
F01_cb10703_c60/f1p0/1398	3
F01_cb3805_c18/f1p2/2660	6
F01_cb3920_c6/f1p0/2371	7
F01_cb3951_c5/f1p0/2177	3
F01_cb400_c23/f1p0/2346	6
F01_cb4004_c6/f1p1/2210	6
F01_cb10714_c10/f1p1/1264	3
F01_cb4005_c18/f1p1/2573	6
F01_cb4028_c3/f2p1/2628	2
F01_cb4042_c5/f2p1/2172	6
F01_cb4065_c0/f6p0/2516	3
F01_cb4076_c2/f1p2/2551	2
F01_cb4076_c37/f1p2/2245	5
F01_cb4100_c5/f1p0/2440	7
F01_cb4111_c2/f1p0/2608	2
F01_cb4127_c0/f6p1/2544	2
F01_cb10717_c0/f9p0/670	7
F01_cb4161_c2/f1p0/1939	4
F01_cb4184_c19/f1p5/2368	8
F01_cb4195_c3/f4p0/2336	6
F01_cb4263_c1/f12p0/2466	8
F01_cb4264_c13/f2p3/1450	1
F01_cb4292_c3/f2p0/2427	2
F01_cb4319_c2/f1p1/2573	8
F01_cb10718_c12/f1p2/1242	2
F01_cb4442_c0/f3p0/2509	2
F01_cb449_c17/f1p0/3361	6
F01_cb4533_c10/f1p1/2397	7
F01_cb4546_c17/f1p0/1452	5
F01_cb4546_c26/f1p0/1296	5
F01_cb4553_c21/f1p0/1798	3
F01_cb4558_c2/f1p0/1497	5
F01_cb4576_c4/f1p0/3418	3
F01_cb4578_c102/f3p0/1806	6
F01_cb4578_c28/f2p1/1909	1
F01_cb4626_c3/f3p1/2504	1
F01_cb4635_c14/f1p0/2373	1
F01_cb4637_c13/f1p0/2414	6
F01_cb467_c2/f4p0/2978	6
F01_cb4672_c8/f1p0/1523	6
F01_cb4674_c2/f3p0/2499	5
F01_cb10733_c20/f1p0/1059	1
F01_cb4674_c7/f1p0/2366	3
F01_cb4693_c17/f1p0/2190	6
F01_cb4710_c27/f4p0/2420	2
F01_cb4712_c0/f12p2/1124	4
F01_cb4721_c1/f1p0/3275	8
F01_cb4746_c4/f3p0/2462	2
F01_cb4749_c3/f1p1/2482	6
F01_cb10733_c24/f1p0/1135	2
F01_cb4798_c1/f4p0/2171	2
F01_cb4811_c12/f1p0/2391	5
F01_cb4813_c167/f13p0/2959	3
F01_cb4814_c0/f2p0/2296	2
F01_cb485_c8/f1p0/3638	6
F01_cb4863_c53/f1p2/2315	2
F01_cb4897_c8/f1p0/2032	6
F01_cb4898_c4/f1p0/2309	6
F01_cb4900_c60/f1p0/2309	2
F01_cb10733_c37/f1p0/1057	1
F01_cb4900_c88/f1p0/2326	6
F01_cb4923_c12/f1p1/2453	3
F01_cb4962_c15/f1p1/2271	1
F01_cb4962_c22/f6p3/2385	6
F01_cb4962_c5/f1p3/2198	2
F01_cb4964_c2/f1p0/2148	8
F01_cb4967_c2/f4p0/2234	6
F01_cb4973_c6/f1p0/1864	6
F01_cb5000_c100397/f1p1/2076	3
F01_cb5000_c107138/f1p0/1730	1
F01_cb5000_c108019/f1p0/2562	3
F01_cb5000_c14838/f4p1/2376	1
F01_cb5000_c1561/f4p4/2952	3
F01_cb5000_c161534/f1p1/2266	5
F01_cb10744_c7/f1p0/1164	2
F01_cb5000_c184995/f1p2/2285	3
F01_cb5000_c19032/f1p0/3278	6
F01_cb5000_c191856/f2p0/3094	2
F01_cb5000_c21064/f1p0/1727	2
F01_cb5000_c21284/f2p0/2217	1
F01_cb5000_c233330/f1p0/1850	3
F01_cb5000_c24112/f1p1/2364	2
F01_cb5000_c244182/f1p0/1787	5
F01_cb5000_c27330/f1p0/2742	6
F01_cb5000_c27522/f1p11/1744	2
F01_cb5000_c28450/f7p1/2828	1
F01_cb5000_c3273/f1p0/2406	2
F01_cb5000_c51586/f2p6/2531	6
F01_cb10768_c3/f1p1/1634	5
F01_cb5000_c58066/f3p3/2219	1
F01_cb5000_c63376/f1p1/2311	1
F01_cb5000_c67632/f2p2/2211	7
F01_cb5000_c68832/f1p4/1905	2
F01_cb5000_c71236/f1p0/1945	2
F01_cb5000_c73178/f1p0/1867	6
F01_cb5000_c874/f9p5/2343	2
F01_cb5092_c2/f1p0/2381	6
F01_cb5106_c15/f1p1/2270	6
F01_cb5136_c1/f2p0/2414	6
F01_cb5184_c9/f1p0/1817	2
F01_cb5200_c14/f1p2/2112	6
F01_cb10803_c2/f1p2/1101	5
F01_cb5202_c13/f1p1/1810	1
F01_cb5221_c1/f1p0/2848	8
F01_cb5225_c8/f1p0/2340	2
F01_cb5245_c17/f1p1/2295	2
F01_cb5263_c12/f1p1/2204	5
F01_cb5271_c37/f1p0/2655	4
F01_cb5271_c52/f1p0/2795	4
F01_cb10803_c8/f1p0/865	4
F01_cb5271_c61/f1p3/2342	4
F01_cb5286_c5/f1p1/1338	3
F01_cb5288_c21/f11p5/2276	2
F01_cb5320_c2/f2p0/2378	5
F01_cb5354_c6/f2p0/1120	3
F01_cb5374_c19/f7p0/1806	1
F01_cb5395_c8/f1p0/2031	6
F01_cb5403_c0/f1p0/2360	3
F01_cb10829_c7/f11p1/821	8
F01_cb542_c10/f2p0/1088	1
F01_cb5427_c8/f1p0/2412	8
F01_cb5428_c14/f1p0/1916	6
F01_cb5431_c5/f1p0/2508	2
F01_cb5447_c22/f1p0/2350	3
F01_cb5452_c3/f1p0/3153	3
F01_cb5466_c1/f2p0/1662	5
F01_cb5475_c10/f1p0/2076	2
F01_cb550_c84/f1p0/4456	6
F01_cb5524_c5/f1p0/2375	5
F01_cb5559_c16/f3p1/1293	8
F01_cb5580_c16/f1p0/1830	2
F01_cb5586_c0/f2p0/2325	2
F01_cb56_c10/f1p0/3489	2
F01_cb10834_c13/f1p0/904	4
F01_cb56_c19/f1p0/3321	6
F01_cb56_c22/f1p0/3061	1
F01_cb5623_c12/f1p0/2103	6
F01_cb5647_c6/f1p1/1536	1
F01_cb5648_c21/f1p0/1624	3
F01_cb5649_c12/f1p0/2146	7
F01_cb5677_c5/f1p0/2025	2
F01_cb5727_c46/f1p1/1783	8
F01_cb574_c30/f1p2/1333	3
F01_cb10840_c2/f1p0/1358	1
F01_cb5771_c4/f1p0/2330	6
F01_cb5782_c35/f6p4/2022	1
F01_cb5783_c4/f1p0/2288	2
F01_cb5812_c8/f1p2/1714	3
F01_cb5851_c10/f1p0/2058	2
F01_cb5855_c7/f1p1/1763	1
F01_cb5877_c4/f1p0/2453	2
F01_cb5879_c29/f1p1/2253	6
F01_cb10175_c56/f3p0/1095	6
F01_cb10840_c5/f1p0/1135	3
F01_cb5922_c8/f1p1/2104	6
F01_cb5926_c21/f1p1/2074	7
F01_cb5979_c8/f1p0/1854	6
F01_cb6067_c1/f1p0/2236	2
F01_cb6070_c7/f1p1/1855	2
F01_cb6076_c16/f1p0/1856	6
F01_cb6092_c8/f1p0/2170	6
F01_cb6093_c40/f1p1/1991	1
F01_cb6097_c1/f1p0/2141	2
F01_cb610_c11/f1p1/5103	3
F01_cb6146_c7/f1p0/2188	2
F01_cb6164_c6/f1p0/2111	2
F01_cb6175_c12/f1p0/1835	5
F01_cb6217_c1/f2p0/1518	6
F01_cb6238_c2/f5p0/2123	5
F01_cb6291_c1/f2p0/2169	2
F01_cb6298_c11/f1p0/2032	8
F01_cb10859_c7/f1p0/1343	8
F01_cb6354_c1/f2p1/2185	6
F01_cb6390_c6/f1p1/2162	6
F01_cb6392_c21/f6p2/1935	6
F01_cb6396_c9/f1p0/2104	6
F01_cb6418_c9/f1p0/2003	3
F01_cb6425_c1/f1p0/2172	3
F01_cb6467_c4/f2p0/2130	3
F01_cb6493_c10/f1p0/2029	1
F01_cb6538_c6/f1p1/2151	2
F01_cb6553_c12/f1p0/1989	6
F01_cb6583_c15/f2p1/2123	1
F01_cb6584_c12/f1p0/1862	5
F01_cb6601_c18/f1p0/1615	2
F01_cb10883_c3/f2p1/1178	7
F01_cb6603_c5/f1p0/2129	6
F01_cb6666_c7/f1p0/1891	6
F01_cb6684_c0/f1p0/2124	5
F01_cb6724_c1/f1p1/2056	6
F01_cb6734_c25/f1p0/2429	6
F01_cb6737_c13/f1p0/1997	2
F01_cb6765_c3/f1p0/1869	2
F01_cb6767_c26/f1p0/1937	2
F01_cb6770_c0/f4p1/1876	5
F01_cb6807_c5/f1p1/2078	2
F01_cb6810_c14/f7p0/2091	2
F01_cb6841_c0/f7p1/1918	3
F01_cb6846_c23/f7p3/2113	2
F01_cb6920_c19/f1p1/1932	2
F01_cb6971_c7/f1p0/1968	8
F01_cb6977_c5/f1p2/2074	5
F01_cb701_c38/f4p0/1176	3
F01_cb7013_c7/f2p1/2003	2
F01_cb7052_c10/f1p2/2060	6
F01_cb7060_c6/f1p2/1983	5
F01_cb7091_c5/f1p0/990	8
F01_cb7104_c5/f1p0/2051	3
F01_cb7114_c51/f1p0/1004	3
F01_cb7122_c9/f1p2/2560	5
F01_cb7131_c54/f1p0/2074	6
F01_cb10897_c22/f1p2/998	3
F01_cb7145_c10/f1p0/1795	2
F01_cb7149_c3/f1p0/1570	8
F01_cb7166_c29/f1p0/1891	6
F01_cb7185_c9/f4p1/2045	1
