# Supplementary material for: Physiological, Proteomic, and Resin Yield-Related Genes Expression Analysis Provides Insights into the Mechanisms Regulating Resin Yield in Masson Pine
Source: Int J Mol Sci. 2023 Sep 7;24(18):13813. doi: 10.3390/ijms241813813 (PMC10531451; doi:10.3390/ijms241813813)
Supplement: Supplementary file 1 [file ijms-24-13813-s001.zip › Table S3.xlsx]

## Sheet: Sheet1
Table S3. DEPs closely correlated with resin yield in clusters 4, 7, 1, and 5.
Protein	Cluster	Description	HM3 vs. LM3			HM8 vs. LM8			HM8 vs. HM3			LM8 vs. LM3			Biological Process	Cellular Component	Molecular Function	KEGG Gene	KEGG pathway	KOG category	KOG description
			Ratio	Regulated Type	P value	Ratio	Regulated Type	P value	Ratio	Regulated Type	P value	Ratio	Regulated Type	P value
F01_cb9785_c15/f1p0/1215	Cluster4	PREDICTED: Mitochondrial fission 1 protein A OS=Arabidopsis thaliana GN=FIS1A PE=1 SV=1	1.78	Up	0.044883	2.269	Up	0.0094583	0.968	--	0.80542	0.759	--	0.27666	GO:0016043 cellular component organization; GO:0006996 organelle organization; GO:0007005 mitochondrion organization; GO:0048285 organelle fission; GO:0009987 cellular process; GO:0000266 mitochondrial fission; GO:0071840 cellular component organization or biogenesis;		GO:0005515 protein binding; GO:0005488 binding;			M	Membrane protein involved in organellar division
F02_cb10060_c3/f1p0/955	Cluster4	hypothetical protein SELMODRAFT_96367 [Selaginella moellendorffii]	1.641	Up	0.034981	2.243	Up	0.021122	0.939	--	0.69228	0.687	--	0.114605	GO:0043632 modification-dependent macromolecule catabolic process; GO:0044265 cellular macromolecule catabolic process; GO:0051603 proteolysis involved in cellular protein catabolic process; GO:0044257 cellular protein catabolic process; GO:0019941 modification-dependent protein catabolic process; GO:0044267 cellular protein metabolic process; GO:0006511 ubiquitin-dependent protein catabolic proc…			smo:SELMODRAFT_106838; hypothetical protein; K03872 transcription elongation factor B, polypeptide 1 (A)	ko04120 Ubiquitin mediated proteolysis;	K	RNA polymerase II transcription elongation factor Elongin/SIII, subunit elongin C
F02_cb10192_c15/f15p3/1511	Cluster4	PREDICTED: 2-alkenal reductase (NADP(+)-dependent) OS=Nicotiana tabacum GN=DBR PE=1 SV=1	1.991	Up	0.00028206	1.802	Up	0.0029593	1.006	--	0.99068	1.112	--	0.22284	GO:0044699 single-organism process; GO:0008152 metabolic process; GO:0055114 oxidation-reduction process; GO:0044710 single-organism metabolic process;		GO:0003824 catalytic activity; GO:0016491 oxidoreductase activity;			R	Predicted NAD-dependent oxidoreductase
F02_cb11764_c12/f2p0/1261	Cluster4	PREDICTED: Stromal cell-derived factor 2-like protein OS=Arabidopsis thaliana GN=SDF2 PE=1 SV=1	9.943	Up	0.00040344	9.267	Up	0.002278	1.674	--	0.182323	1.797	--	0.071941		GO:0016020 membrane;				R	Uncharacterized secreted protein SDF2 (Stromal cell-derived factor 2), contains MIR domains
F01_cb11325_c7/f7p0/607	Cluster4	unknown [Picea sitchensis]	2.146	Up	0.006364	2.741	Up	0.005539	1.066	--	0.7433	0.835	--	0.39672
F02_cb12721_c3/f1p1/1534	Cluster4	PREDICTED: Ras-related protein Rab2BV OS=Beta vulgaris GN=RAB2BV PE=2 SV=1	9.677	Up	0.00044404	7.334	Up	0.00108126	0.917	--	0.72388	1.21	--	0.3723	GO:0050794 regulation of cellular process; GO:0044700 single organism signaling; GO:0051716 cellular response to stimulus; GO:0007165 signal transduction; GO:0050789 regulation of biological process; GO:0007154 cell communication; GO:0035556 intracellular signal transduction; GO:0044699 single-organism process; GO:0007264 small GTPase mediated signal transduction; GO:0023052 signaling; GO:0050896…		GO:1901265 nucleoside phosphate binding; GO:0001882 nucleoside binding; GO:0043167 ion binding; GO:0000166 nucleotide binding; GO:0097159 organic cyclic compound binding; GO:1901363 heterocyclic compound binding; GO:0032549 ribonucleoside binding; GO:0097367 carbohydrate derivative binding; GO:0032553 ribonucleotide binding; GO:0005488 binding; GO:0032550 purine ribonucleoside binding; GO:0043168…			U	GTPase Rab11/YPT3, small G protein superfamily
F02_cb13483_c0/f2p0/1088	Cluster4	unknown [Picea sitchensis]	2.244	Up	0.023101	3.237	Up	1.98e-06	0.688	--	0.089184	0.477	--	0.077422
F02_cb14159_c1/f1p0/1238	Cluster4	unknown [Picea sitchensis]	1.841	Up	0.0034996	2.533	Up	0.0032832	0.985	--	0.83852	0.716	--	0.072983
F02_cb14490_c1/f1p0/1107	Cluster4	lambda class glutathione S-transferase [Pinus tabuliformis]	11.418	Up	0.0031415	15.08	Up	0.00015733	1.148	--	0.57206	0.869	--	0.9619			GO:0005515 protein binding; GO:0005488 binding;	gmx:547597; In2-1 protein; K00799 glutathione S-transferase [EC:2.5.1.18] (A)	ko00480 Glutathione metabolism;	O	Glutathione S-transferase
F02_cb16041_c1/f1p0/1472	Cluster4	unknown [Picea sitchensis]	2.011	Up	0.00108138	2.096	Up	0.029082	1.206	--	0.5112	1.157	--	0.157377						R	Predicted hydrolase/acyltransferase (alpha/beta hydrolase superfamily)
F02_cb4314_c7/f1p0/2288	Cluster4	unknown [Picea sitchensis]	2.625	Up	0.044759	2.417	Up	0.0191838	1.016	--	0.93472	1.104	--	0.64572
F01_cb11671_c3/f4p0/899	Cluster4	"""PREDICTED: 30S ribosomal protein 3, chloroplastic OS=Spinacia oleracea GN=PSRP3 PE=1 SV=1"""	1.976	Up	0.025441	2.11	Up	0.016402	0.983	--	0.8702	0.92	--	0.7647	GO:0006518 peptide metabolic process; GO:0043043 peptide biosynthetic process; GO:0044267 cellular protein metabolic process; GO:0006807 nitrogen compound metabolic process; GO:0009058 biosynthetic process; GO:0043603 cellular amide metabolic process; GO:0044238 primary metabolic process; GO:1901566 organonitrogen compound biosynthetic process; GO:1901576 organic substance biosynthetic process; G…	GO:0005840 ribosome; GO:0043226 organelle; GO:0043229 intracellular organelle; GO:0043232 intracellular non-membrane-bounded organelle; GO:0044464 cell part; GO:0005622 intracellular; GO:0005737 cytoplasm; GO:0032991 macromolecular complex; GO:0044424 intracellular part; GO:1990904 ribonucleoprotein complex; GO:0005623 cell; GO:0030529 intracellular ribonucleoprotein complex; GO:0044444 cytoplasm…	GO:0003735 structural constituent of ribosome; GO:0005198 structural molecule activity;
F02_cb5642_c26/f1p0/2208	Cluster4	PREDICTED: Plastidic glucose transporter 4 OS=Arabidopsis thaliana GN=At5g16150 PE=1 SV=2	2.509	Up	0.0024209	1.959	Up	0.0159418	0.729	--	0.121524	0.934	--	0.67004	GO:0006810 transport; GO:0055085 transmembrane transport; GO:0051179 localization; GO:0051234 establishment of localization;	GO:0031224 intrinsic component of membrane; GO:0016020 membrane; GO:0016021 integral component of membrane; GO:0044425 membrane part;	GO:0022892 substrate-specific transporter activity; GO:0022891 substrate-specific transmembrane transporter activity; GO:0022857 transmembrane transporter activity; GO:0005215 transporter activity;			R	Predicted transporter (major facilitator superfamily)
F02_cb8205_c3/f2p0/1905	Cluster4	PREDICTED: Protein FLX-like 2 OS=Arabidopsis thaliana GN=FLXL2 PE=1 SV=1	4.907	Up	0.00137912	4.672	Up	0.00147834	0.659	--	0.140675	0.692	--	0.076125
F02_cb8539_c4/f1p1/1974	Cluster4	hypothetical protein AMTR_s00024p00180920 [Amborella trichopoda]	6.821	Up	0.00031804	12.224	Up	0.00068199	1.18	--	0.21404	0.659	--	0.20306
F02_cb8729_c1/f2p0/1198	Cluster4	unknown [Picea sitchensis]	33.379	Up	0.00173989	21.255	Up	0.00082101	0.39	--	0.069464	0.612	--	0.089378						S	Predicted membrane protein
F02_cb9589_c39/f1p1/1115	Cluster4	hypothetical protein GALMADRAFT_146853 [Galerina marginata CBS 339.88]	3.374	Up	0.0107383	4.263	Up	0.0037964	1.049	--	0.8911	0.83	--	0.27234
F02_cb9713_c10/f3p0/790	Cluster4	unknown [Picea sitchensis]	1.903	Up	0.023916	2.338	Up	0.0039995	0.971	--	0.84436	0.791	--	0.26412						G	Glyoxalase
F01_cb12566_c0/f6p1/882	Cluster4	PREDICTED: Sm-like protein LSM36B OS=Arabidopsis thaliana GN=LSM6B PE=1 SV=1	1.687	Up	0.029335	2.31	Up	0.0091965	0.795	--	0.142637	0.58	--	0.054299				sot:102588530; U6 snRNA-associated Sm-like protein LSm6-like; K12625 U6 snRNA-associated Sm-like protein LSm6 (A)	ko03040 Spliceosome; ko03018 RNA degradation;	A	Small nuclear ribonucleoprotein F
F01_cb12694_c10/f1p0/954	Cluster4	unknown [Picea sitchensis]	2.31	Up	5.64e-05	3.163	Up	0.003005	1.22	--	0.38044	0.891	--	0.076036				gmx:547597; In2-1 protein; K00799 glutathione S-transferase [EC:2.5.1.18] (A)	ko00480 Glutathione metabolism;
F01_cb12808_c3/f1p0/1202	Cluster4	unknown [Picea sitchensis]	1.942	Up	0.030703	1.794	Up	0.023703	0.715	--	0.068522	0.775	--	0.38998	GO:0009116 nucleoside metabolic process; GO:0042278 purine nucleoside metabolic process; GO:0009167 purine ribonucleoside monophosphate metabolic process; GO:0009117 nucleotide metabolic process; GO:0044699 single-organism process; GO:0046129 purine ribonucleoside biosynthetic process; GO:0009163 nucleoside biosynthetic process; GO:0009058 biosynthetic process; GO:0009156 ribonucleoside monophosp…	GO:0016020 membrane; GO:0098800 inner mitochondrial membrane protein complex; GO:0031090 organelle membrane; GO:0098796 membrane protein complex; GO:0005737 cytoplasm; GO:0032991 macromolecular complex; GO:0098798 mitochondrial protein complex; GO:0044424 intracellular part; GO:0005623 cell; GO:0044455 mitochondrial membrane part; GO:0044422 organelle part; GO:0005740 mitochondrial envelope; GO:0…	GO:0015075 ion transmembrane transporter activity; GO:0022892 substrate-specific transporter activity; GO:0015077 monovalent inorganic cation transmembrane transporter activity; GO:0022890 inorganic cation transmembrane transporter activity; GO:0015078 hydrogen ion transmembrane transporter activity; GO:0008324 cation transmembrane transporter activity; GO:0022891 substrate-specific transmembrane…	cit:102609858; hypothetical protein; K02140 F-type H+-transporting ATPase subunit g (A)	ko00190 Oxidative phosphorylation;
F01_cb13318_c3/f1p0/698	Cluster4	unknown [Picea sitchensis]	1.794	Up	0.025663	1.672	Up	0.0185197	0.737	--	0.055803	0.791	--	0.3077
F01_cb10591_c22/f1p0/1224	Cluster4	PREDICTED: Probable phospholipid hydroperoxide glutathione peroxidase OS=Citrus sinensis GN=CSA PE=1 SV=1	2.014	Up	0.0116763	2.043	Up	0.0097375	0.657	--	0.050936	0.648	--	0.055158	GO:0008152 metabolic process; GO:0006950 response to stress; GO:0055114 oxidation-reduction process; GO:0044710 single-organism metabolic process; GO:0006979 response to oxidative stress; GO:0044699 single-organism process; GO:0050896 response to stimulus;		GO:0016209 antioxidant activity; GO:0004601 peroxidase activity; GO:0004602 glutathione peroxidase activity; GO:0003824 catalytic activity; GO:0016491 oxidoreductase activity; GO:0016684 oxidoreductase activity, acting on peroxide as acceptor;	atr:s00009p00255140; AMTR_s00009p00255140; hypothetical protein; K00432 glutathione peroxidase [EC:1.11.1.9] (A)	ko00590 Arachidonic acid metabolism; ko00480 Glutathione metabolism;	O	Glutathione peroxidase
F01_cb10968_c5/f1p0/1291	Cluster7	PREDICTED: Mitochondrial import receptor subunit TOM20 OS=Solanum tuberosum GN=TOM20 PE=1 SV=1	1.374	Up	0.0174599	1.711	Up	0.00190021	1.795	Up	0.00119724	1.442	Up	0.012082	GO:0016043 cellular component organization; GO:0046907 intracellular transport; GO:0072594 establishment of protein localization to organelle; GO:0007006 mitochondrial membrane organization; GO:0017038 protein import; GO:0006839 mitochondrial transport; GO:0044699 single-organism process; GO:0015031 protein transport; GO:0051234 establishment of localization; GO:0006605 protein targeting; GO:0045…	GO:0016020 membrane; GO:0019867 outer membrane; GO:0031090 organelle membrane; GO:0098796 membrane protein complex; GO:0005737 cytoplasm; GO:0032991 macromolecular complex; GO:0098798 mitochondrial protein complex; GO:0044424 intracellular part; GO:0044455 mitochondrial membrane part; GO:0005623 cell; GO:0044422 organelle part; GO:0005740 mitochondrial envelope; GO:0044425 membrane part; GO:00444…	GO:0005515 protein binding; GO:0005488 binding;
F01_cb11062_c1/f1p0/1259	Cluster7	carboxylesterase ester hydrolase [Pinus massoniana]	1.363	Up	0.049061	1.665	Up	0.039164	1.88	Up	0.0133569	1.539	Up	0.036463			GO:0016787 hydrolase activity; GO:0003824 catalytic activity; GO:0016788 hydrolase activity, acting on ester bonds;			I	Isoamyl acetate-hydrolyzing esterase
F01_cb9185_c1/f2p0/1370	Cluster7	PREDICTED: pleckstrin homology domain-containing family A member 8-like [Elaeis guineensis]	1.295	Up	0.034196	2.826	Up	0.00184342	3.054	Up	0.0014019	1.399	Up	0.0148551	GO:0006810 transport; GO:0006869 lipid transport; GO:1902578 single-organism localization; GO:0046836 glycolipid transport; GO:1901264 carbohydrate derivative transport; GO:0044699 single-organism process; GO:0010876 lipid localization; GO:0071702 organic substance transport; GO:0051179 localization; GO:0033036 macromolecule localization; GO:0044765 single-organism transport; GO:0051234 establish…	GO:0044424 intracellular part; GO:0005623 cell; GO:0044464 cell part; GO:0005622 intracellular; GO:0005737 cytoplasm;	GO:0051861 glycolipid binding; GO:0097367 carbohydrate derivative binding; GO:1901505 carbohydrate derivative transporter activity; GO:0005488 binding; GO:0005319 lipid transporter activity; GO:0017089 glycolipid transporter activity; GO:0008289 lipid binding; GO:0022892 substrate-specific transporter activity; GO:0005215 transporter activity;			G	Glycolipid transfer protein
F02_cb10080_c12/f2p0/863	Cluster7	PREDICTED: Probable carboxylesterase 15 OS=Arabidopsis thaliana GN=CXE15 PE=2 SV=1	2.18	Up	0.0150432	7.019	Up	0.00022179	12.795	Up	0.000100077	3.974	Up	0.00169613	GO:0008152 metabolic process;		GO:0016787 hydrolase activity; GO:0003824 catalytic activity;			V	Arylacetamide deacetylase
F02_cb10984_c2/f2p0/1093	Cluster7	hypothetical protein CICLE_v10002689mg [Citrus clementina]	1.803	Up	0.0051405	4.739	Up	0.0008989	5.619	Up	0.0006363	2.138	Up	0.00170305	GO:0006950 response to stress; GO:0050896 response to stimulus;
F02_cb1292_c21/f1p0/1639	Cluster7	hypothetical protein PHAVU_008G267600g [Phaseolus vulgaris]	2.978	Up	0.000178353	4.039	Up	0.0005429	2.429	Up	0.0035443	1.791	Up	0.00125955	GO:0050794 regulation of cellular process; GO:0044700 single organism signaling; GO:0051716 cellular response to stimulus; GO:0007165 signal transduction; GO:0050789 regulation of biological process; GO:0007154 cell communication; GO:0044699 single-organism process; GO:0023052 signaling; GO:0050896 response to stimulus; GO:0009987 cellular process; GO:0065007 biological regulation;		GO:0005515 protein binding; GO:0005488 binding;
F02_cb13535_c9/f1p0/1407	Cluster7	PREDICTED: UDP-glycosyltransferase 72B1 OS=Arabidopsis thaliana GN=UGT72B1 PE=1 SV=1	2.842	Up	0.00052459	1.343	Up	0.045281	1.398	Up	0.0062967	2.958	Up	0.00125551	GO:0008152 metabolic process;		GO:0016757 transferase activity, transferring glycosyl groups; GO:0016758 transferase activity, transferring hexosyl groups; GO:0003824 catalytic activity; GO:0016740 transferase activity;			GC	UDP-glucuronosyl and UDP-glucosyl transferase
F01_cb11555_c0/f2p0/1570	Cluster7	hypothetical protein SELMODRAFT_131287 [Selaginella moellendorffii]	1.961	Up	0.021521	1.748	Up	0.00108339	2.973	Up	0.000158186	3.335	Up	0.0027235			GO:0097159 organic cyclic compound binding; GO:1901363 heterocyclic compound binding; GO:0003824 catalytic activity; GO:0005488 binding; GO:0043167 ion binding; GO:0043168 anion binding; GO:0048037 cofactor binding; GO:0030170 pyridoxal phosphate binding;
F02_cb5162_c94/f1p2/2629	Cluster7	"""PREDICTED: 3-oxo-Delta(4,5)-steroid 5-beta-reductase OS=Arabidopsis thaliana GN=VEP1 PE=1 SV=1"""	1.692	Up	0.039905	3.502	Up	0.00127616	3.466	Up	0.00170453	1.675	Up	0.034721			GO:0048037 cofactor binding; GO:0003824 catalytic activity; GO:0005488 binding; GO:0050662 coenzyme binding;
F02_cb5592_c3/f1p0/2431	Cluster7	"""PREDICTED: Isocitrate dehydrogenase [NAD] regulatory subunit 1, mitochondrial OS=Arabidopsis thaliana GN=IDH1 PE=1 SV=2"""	6.336	Up	0.000103591	5.782	Up	0.00033748	2.994	Up	0.0029772	3.28	Up	0.00025522	GO:0072350 tricarboxylic acid metabolic process; GO:0055114 oxidation-reduction process; GO:0044281 small molecule metabolic process; GO:0044763 single-organism cellular process; GO:0006099 tricarboxylic acid cycle; GO:0044699 single-organism process; GO:0044238 primary metabolic process; GO:0045333 cellular respiration; GO:0044237 cellular metabolic process; GO:0071704 organic substance metaboli…		GO:0004448 isocitrate dehydrogenase activity; GO:0016614 oxidoreductase activity, acting on CH-OH group of donors; GO:0016616 oxidoreductase activity, acting on the CH-OH group of donors, NAD or NADP as acceptor; GO:0004449 isocitrate dehydrogenase (NAD+) activity; GO:0003824 catalytic activity; GO:0016491 oxidoreductase activity;	atr:s00001p00200380; AMTR_s00001p00200380; hypothetical protein; K00030 isocitrate dehydrogenase (NAD+) [EC:1.1.1.41] (A)	ko00020 Citrate cycle (TCA cycle); ko01200 Carbon metabolism; ko01230 Biosynthesis of amino acids; ko01210 2-Oxocarboxylic acid metabolism;
F02_cb8256_c84/f1p3/1766	Cluster7	PREDICTED: UDP-glycosyltransferase 91A1 OS=Arabidopsis thaliana GN=UGT91A1 PE=2 SV=1	2.471	Up	0.0053009	1.541	Up	0.0091419	4.035	Up	0.00023775	6.469	Up	0.0002555	GO:0008152 metabolic process;		GO:0016757 transferase activity, transferring glycosyl groups; GO:0016758 transferase activity, transferring hexosyl groups; GO:0003824 catalytic activity; GO:0016740 transferase activity;			GC	UDP-glucuronosyl and UDP-glucosyl transferase
F02_cb9569_c9/f8p1/1395	Cluster7	PREDICTED: Probable aldo-keto reductase 2 OS=Oryza sativa subsp. japonica GN=Os04g0338000 PE=2 SV=2	3.191	Up	0.04164	3.444	Up	0.00040392	6.737	Up	0.00161787	6.241	Up	0.029964						C	Voltage-gated shaker-like K+ channel, subunit beta/KCNAB
F01_cb13292_c7/f1p0/1353	Cluster7	PREDICTED: Probable calcium-binding protein CML49 OS=Arabidopsis thaliana GN=CML49 PE=2 SV=1	1.258	Up	0.04248	1.682	Up	0.00053909	1.939	Up	0.00049947	1.45	Up	0.0052578			GO:0043169 cation binding; GO:0046872 metal ion binding; GO:0005509 calcium ion binding; GO:0005488 binding; GO:0043167 ion binding;	pda:103709704; probable calcium-binding protein CML27; K13448 calcium-binding protein CML (A)	ko04626 Plant-pathogen interaction;	T	Ca2+-binding protein, EF-Hand protein superfamily
F01_cb13841_c6/f1p1/711	Cluster7	PREDICTED: Cytochrome b-c1 complex subunit 9 OS=Solanum tuberosum PE=1 SV=1	1.73	Up	0.00187563	1.884	Up	0.0059414	1.61	Up	0.011875	1.478	Up	0.0124207	GO:0016310 phosphorylation; GO:0009116 nucleoside metabolic process; GO:0042278 purine nucleoside metabolic process; GO:0006725 cellular aromatic compound metabolic process; GO:0009167 purine ribonucleoside monophosphate metabolic process; GO:0042773 ATP synthesis coupled electron transport; GO:0009259 ribonucleotide metabolic process; GO:0009117 nucleotide metabolic process; GO:0044699 single-or…	GO:0016020 membrane; GO:0098800 inner mitochondrial membrane protein complex; GO:0031090 organelle membrane; GO:0098796 membrane protein complex; GO:0005737 cytoplasm; GO:0031224 intrinsic component of membrane; GO:0032991 macromolecular complex; GO:0098798 mitochondrial protein complex; GO:0044424 intracellular part; GO:0005623 cell; GO:0044455 mitochondrial membrane part; GO:0044422 organelle p…		pxb:103929460; cytochrome b-c1 complex subunit 9-like; K00419 ubiquinol-cytochrome c reductase subunit 9 (A)	ko00190 Oxidative phosphorylation;	C	Ubiquinol cytochrome c oxidoreductase, subunit QCR9
F01_cb15522_c11/f4p0/936	Cluster7	PREDICTED: Universal stress protein PHOS32 OS=Arabidopsis thaliana GN=PHOS32 PE=1 SV=1	2.503	Up	0.0033013	2.054	Up	0.000176112	1.326	Up	0.0188	1.616	Up	0.023344	GO:0006950 response to stress; GO:0050896 response to stimulus;
F01_cb10952_c15/f7p0/1402	Cluster1	PREDICTED: Probable cinnamyl alcohol dehydrogenase 1 OS=Arabidopsis thaliana GN=CAD1 PE=2 SV=1	0.167	Down	0.0067428	0.146	Down	5.57e-05	0.866	--	0.48176	0.994	--	0.83484	GO:0044699 single-organism process; GO:0008152 metabolic process; GO:0055114 oxidation-reduction process; GO:0044710 single-organism metabolic process;		GO:0046914 transition metal ion binding; GO:0003824 catalytic activity; GO:0005488 binding; GO:0043167 ion binding; GO:0046872 metal ion binding; GO:0043169 cation binding; GO:0008270 zinc ion binding; GO:0016491 oxidoreductase activity;			Q	Alcohol dehydrogenase, class V
F01_cb7622_c46/f45p1/1869	Cluster1	PREDICTED: Bifunctional nitrilase/nitrile hydratase NIT4A OS=Lupinus angustifolius GN=NIT4A PE=1 SV=1	0.335	Down	0.00020147	0.216	Down	0.000155108	0.78	--	0.06628	1.212	--	0.101444	GO:0006807 nitrogen compound metabolic process; GO:0008152 metabolic process;		GO:0016787 hydrolase activity; GO:0003824 catalytic activity; GO:0016810 hydrolase activity, acting on carbon-nitrogen (but not peptide) bonds;	cam:101500877; bifunctional nitrilase/nitrile hydratase NIT4B-like; K13035 beta-cyano-L-alanine hydratase/nitrilase [EC:3.5.5.4 4.2.1.65] (A)	ko00460 Cyanoamino acid metabolism;	E	Carbon-nitrogen hydrolase
F01_cb7779_c6/f1p0/1665	Cluster1	PREDICTED: uncharacterized protein LOC105053842 [Elaeis guineensis]	0.292	Down	0.0025389	0.324	Down	0.0023208	1.273	--	0.20654	1.146	--	0.48734	GO:0016051 carbohydrate biosynthetic process; GO:0019319 hexose biosynthetic process; GO:0044711 single-organism biosynthetic process; GO:0044281 small molecule metabolic process; GO:0044699 single-organism process; GO:0009058 biosynthetic process; GO:0046364 monosaccharide biosynthetic process; GO:0044238 primary metabolic process; GO:0005975 carbohydrate metabolic process; GO:1901576 organic su…		GO:0005524 ATP binding; GO:1901265 nucleoside phosphate binding; GO:0004611 phosphoenolpyruvate carboxykinase activity; GO:0001882 nucleoside binding; GO:0043167 ion binding; GO:0016829 lyase activity; GO:0000166 nucleotide binding; GO:0004612 phosphoenolpyruvate carboxykinase (ATP) activity; GO:0097159 organic cyclic compound binding; GO:1901363 heterocyclic compound binding; GO:0032549 ribonucl…
F01_cb8202_c6/f4p0/1836	Cluster1	unknown [Picea sitchensis]	0.538	Down	0.034221	0.254	Down	0.0136793	0.579	--	0.142179	1.225	--	0.26312			GO:0016787 hydrolase activity; GO:0042578 phosphoric ester hydrolase activity; GO:0003824 catalytic activity; GO:0008252 nucleotidase activity; GO:0016791 phosphatase activity; GO:0016788 hydrolase activity, acting on ester bonds;	atr:s00036p00106140; AMTR_s00036p00106140; hypothetical protein; K03787 5'-nucleotidase [EC:3.1.3.5] (A)	ko00230 Purine metabolism; ko00240 Pyrimidine metabolism; ko00760 Nicotinate and nicotinamide metabolism;
F01_cb8661_c20/f1p0/1419	Cluster1	PREDICTED: Probable carboxylesterase Os04g0669500 OS=Oryza sativa subsp. japonica GN=Os04g0669500 PE=3 SV=1	0.156	Down	0.0060614	0.109	Down	0.0107752	0.697	--	0.21142	0.998	--	0.796			GO:0016787 hydrolase activity; GO:0003824 catalytic activity;	pxb:103946057; acyl-protein thioesterase 1-like; K06130 lysophospholipase II [EC:3.1.1.5] (A)	ko00564 Glycerophospholipid metabolism;	I	Lysophospholipase
F01_cb8670_c2/f1p0/1727	Cluster1	PREDICTED: Ras-related protein Rab2BV OS=Beta vulgaris GN=RAB2BV PE=2 SV=1	0.168	Down	0.00119558	0.177	Down	2.39e-05	1.022	--	0.82002	0.971	--	0.96728	GO:0050794 regulation of cellular process; GO:0044700 single organism signaling; GO:0051716 cellular response to stimulus; GO:0007165 signal transduction; GO:0050789 regulation of biological process; GO:0007154 cell communication; GO:0035556 intracellular signal transduction; GO:0044699 single-organism process; GO:0007264 small GTPase mediated signal transduction; GO:0023052 signaling; GO:0050896…		GO:1901265 nucleoside phosphate binding; GO:0001882 nucleoside binding; GO:0043167 ion binding; GO:0000166 nucleotide binding; GO:0097159 organic cyclic compound binding; GO:1901363 heterocyclic compound binding; GO:0032549 ribonucleoside binding; GO:0097367 carbohydrate derivative binding; GO:0032553 ribonucleotide binding; GO:0005488 binding; GO:0032550 purine ribonucleoside binding; GO:0043168…	cam:101498836; ras-related protein RABA5a-like; K07904 Ras-related protein Rab-11A (A)	ko04144 Endocytosis;	U	GTPase Rab11/YPT3, small G protein superfamily
F01_cb8797_c2/f1p0/1616	Cluster1	predicted protein [Physcomitrella patens]	0.351	Down	0.0077829	0.145	Down	0.0057432	0.794	--	0.181239	1.918	--	0.075183	GO:0006725 cellular aromatic compound metabolic process; GO:0006145 purine nucleobase catabolic process; GO:0044699 single-organism process; GO:0046098 guanine metabolic process; GO:0072523 purine-containing compound catabolic process; GO:0044237 cellular metabolic process; GO:0071704 organic substance metabolic process; GO:0044270 cellular nitrogen compound catabolic process; GO:0006147 guanine …		GO:0008892 guanine deaminase activity; GO:0016814 hydrolase activity, acting on carbon-nitrogen (but not peptide) bonds, in cyclic amidines; GO:0046914 transition metal ion binding; GO:0003824 catalytic activity; GO:0005488 binding; GO:0043167 ion binding; GO:0043169 cation binding; GO:0019239 deaminase activity; GO:0046872 metal ion binding; GO:0016787 hydrolase activity; GO:0008270 zinc ion bin…	ppp:PHYPADRAFT_233220; hypothetical protein; K01487 guanine deaminase [EC:3.5.4.3] (A)	ko00230 Purine metabolism;
F01_cb10191_c17/f1p0/1031	Cluster1	PREDICTED: Small ubiquitin-related modifier 1 OS=Oryza sativa subsp. japonica GN=SUMO1 PE=1 SV=1	0.326	Down	0.0059237	0.323	Down	1.91e-05	1.065	--	0.39026	1.073	--	0.62598			GO:0005515 protein binding; GO:0005488 binding;	atr:s00228p00023500; AMTR_s00228p00023500; hypothetical protein; K12160 small ubiquitin-related modifier (A)	ko03013 RNA transport;	O	Ubiquitin-like proteins
F02_cb10870_c4/f1p0/1151	Cluster1	PREDICTED: Peptide methionine sulfoxide reductase A3 OS=Arabidopsis thaliana GN=MSRA3 PE=1 SV=1	0.195	Down	0.0066647	0.24	Down	0.00168309	1.147	--	0.62092	0.929	--	0.97368	GO:0044699 single-organism process; GO:0008152 metabolic process; GO:0055114 oxidation-reduction process; GO:0044710 single-organism metabolic process;		GO:0016667 oxidoreductase activity, acting on a sulfur group of donors; GO:0008113 peptide-methionine (S)-S-oxide reductase activity; GO:0016671 oxidoreductase activity, acting on a sulfur group of donors, disulfide as acceptor; GO:0003824 catalytic activity; GO:0016491 oxidoreductase activity;			O	Peptide methionine sulfoxide reductase
F02_cb12550_c2/f4p0/956	Cluster1	PREDICTED: Short-chain type dehydrogenase/reductase OS=Picea abies PE=2 SV=1	0.11	Down	0.00097963	0.09	Down	0.00138428	1.102	--	0.90272	1.35	--	0.2667			GO:0003824 catalytic activity; GO:0016491 oxidoreductase activity;	atr:s00005p00200590; AMTR_s00005p00200590; hypothetical protein; K00059 3-oxoacyl-[acyl-carrier protein] reductase [EC:1.1.1.100] (A)	ko00061 Fatty acid biosynthesis; ko01212 Fatty acid metabolism; ko00780 Biotin metabolism; ko01040 Biosynthesis of unsaturated fatty acids;	R	Reductases with broad range of substrate specificities
F01_cb11376_c0/f4p0/747	Cluster1	PREDICTED: NADH dehydrogenase [ubiquinone] 1 beta subcomplex subunit 9 OS=Arabidopsis thaliana GN=CIB22 PE=1 SV=1	0.228	Down	0.0171805	0.164	Down	0.00029917	0.706	--	0.37426	0.982	--	0.92444				sbi:SORBI_10g030030; SORBIDRAFT_10g030030, Sb10g030030; hypothetical protein; K03965 NADH dehydrogenase (ubiquinone) 1 beta subcomplex subunit 9 (A)	ko00190 Oxidative phosphorylation;	C	NADH:ubiquinone oxidoreductase, NDUFB9/B22 subunit
F01_cb11452_c4/f1p1/1497	Cluster1	PREDICTED: Stromal cell-derived factor 2-like protein OS=Arabidopsis thaliana GN=SDF2 PE=1 SV=1	0.399	Down	0.0048199	0.27	Down	0.0026772	0.746	--	0.129218	1.105	--	0.63974		GO:0016020 membrane;				R	Uncharacterized secreted protein SDF2 (Stromal cell-derived factor 2), contains MIR domains
F02_cb7171_c0/f2p0/2124	Cluster1	hypothetical protein VITISV_032634 [Vitis vinifera]	0.461	Down	0.024857	0.277	Down	0.0022954	0.572	--	0.066059	0.952	--	0.79388			GO:0097159 organic cyclic compound binding; GO:1901363 heterocyclic compound binding; GO:0046914 transition metal ion binding; GO:0005488 binding; GO:0003676 nucleic acid binding; GO:0043167 ion binding; GO:0046872 metal ion binding; GO:0043169 cation binding; GO:0008270 zinc ion binding;	osa:4349826; Os11g0157000; K12619 5'-3' exoribonuclease 2 [EC:3.1.13.-] (A)	ko03008 Ribosome biogenesis in eukaryotes; ko03018 RNA degradation;	R	FOG: Transposon-encoded proteins with TYA, reverse transcriptase, integrase domains in various combinations
F01_cb11820_c0/f37p5/1153	Cluster1	PREDICTED: 40S ribosomal protein S4-3 OS=Arabidopsis thaliana GN=RPS4D PE=2 SV=2	0.218	Down	0.000139923	0.218	Down	0.00165929	1.355	--	0.22858	1.359	--	0.066676	GO:0006518 peptide metabolic process; GO:0043043 peptide biosynthetic process; GO:0044267 cellular protein metabolic process; GO:0006807 nitrogen compound metabolic process; GO:0009058 biosynthetic process; GO:0043603 cellular amide metabolic process; GO:0044238 primary metabolic process; GO:1901566 organonitrogen compound biosynthetic process; GO:1901576 organic substance biosynthetic process; G…	GO:0005840 ribosome; GO:0043226 organelle; GO:0043229 intracellular organelle; GO:0043232 intracellular non-membrane-bounded organelle; GO:0044464 cell part; GO:0005622 intracellular; GO:0005737 cytoplasm; GO:0032991 macromolecular complex; GO:0044424 intracellular part; GO:1990904 ribonucleoprotein complex; GO:0005623 cell; GO:0030529 intracellular ribonucleoprotein complex; GO:0044444 cytoplasm…	GO:0097159 organic cyclic compound binding; GO:1901363 heterocyclic compound binding; GO:0003723 RNA binding; GO:0005488 binding; GO:0003676 nucleic acid binding; GO:0005198 structural molecule activity; GO:0003735 structural constituent of ribosome;	ppp:PHYPADRAFT_180098; hypothetical protein; K02987 small subunit ribosomal protein S4e (A)	ko03010 Ribosome;	J	40S ribosomal protein S4
F02_cb9735_c200587/f1p1/1951	Cluster1	PREDICTED: DEAD-box ATP-dependent RNA helicase 38 OS=Oryza sativa subsp. japonica GN=Os03g0158200 PE=3 SV=1	0.413	Down	0.033884	0.444	Down	0.045303	1.063	--	0.9659	0.988	--	0.89254			GO:0005524 ATP binding; GO:1901265 nucleoside phosphate binding; GO:0001882 nucleoside binding; GO:0043167 ion binding; GO:0000166 nucleotide binding; GO:0097159 organic cyclic compound binding; GO:1901363 heterocyclic compound binding; GO:0032549 ribonucleoside binding; GO:0097367 carbohydrate derivative binding; GO:0032553 ribonucleotide binding; GO:0005488 binding; GO:0003676 nucleic acid bind…			A	ATP-dependent RNA helicase
F02_cb9735_c66113/f1p0/3128	Cluster1	predicted protein [Physcomitrella patens]	0.67	Down	0.0153244	0.366	Down	0.0053573	0.647	--	0.052162	1.184	--	0.26062
F01_cb12994_c6/f1p0/1013	Cluster1	"""PREDICTED: Triosephosphate isomerase, cytosolic OS=Arabidopsis thaliana GN=CTIMC PE=1 SV=2"""	0.136	Down	0.0020609	0.131	Down	0.0119763	1.413	--	0.32056	1.469	--	0.19022	GO:0006757 ATP generation from ADP; GO:0009116 nucleoside metabolic process; GO:0042278 purine nucleoside metabolic process; GO:0006165 nucleoside diphosphate phosphorylation; GO:0046031 ADP metabolic process; GO:0019362 pyridine nucleotide metabolic process; GO:0006096 glycolytic process; GO:0009167 purine ribonucleoside monophosphate metabolic process; GO:0009117 nucleotide metabolic process; G…		GO:0016853 isomerase activity; GO:0016860 intramolecular oxidoreductase activity; GO:0004807 triose-phosphate isomerase activity; GO:0003824 catalytic activity; GO:0016861 intramolecular oxidoreductase activity, interconverting aldoses and ketoses;	sot:102577900; triosphosphate isomerase-like protein; K01803 triosephosphate isomerase (TIM) [EC:5.3.1.1] (A)	ko00051 Fructose and mannose metabolism; ko00010 Glycolysis / Gluconeogenesis; ko01200 Carbon metabolism; ko00710 Carbon fixation in photosynthetic organisms; ko01230 Biosynthesis of amino acids; ko00562 Inositol phosphate metabolism;	G	Triosephosphate isomerase
F01_cb13203_c11/f4p0/1198	Cluster1	PREDICTED: Pathogen-related protein OS=Hordeum vulgare PE=2 SV=2	0.207	Down	2.27e-05	0.136	Down	0.0023179	0.528	--	0.069315	0.8	--	0.077022
F01_cb14101_c0/f4p0/1173	Cluster1	hypothetical protein AMTR_s00019p00221860 [Amborella trichopoda]	0.366	Down	8.19e-05	0.269	Down	0.0056422	0.689	--	0.199757	0.94	--	0.60062	GO:0008152 metabolic process;		GO:0016787 hydrolase activity; GO:0003824 catalytic activity;			R	Predicted haloacid-halidohydrolase and related hydrolases
F01_cb14274_c7/f9p0/1332	Cluster1	"""PREDICTED: 20 kDa chaperonin, chloroplastic OS=Arabidopsis thaliana GN=CPN20 PE=1 SV=2"""	0.13	Down	0.00184419	0.327	Down	2.42e-05	1.153	--	0.37634	0.457	--	0.083357	GO:0050794 regulation of cellular process; GO:1901671 positive regulation of superoxide dismutase activity; GO:1901033 positive regulation of response to reactive oxygen species; GO:1900409 positive regulation of cellular response to oxidative stress; GO:0080134 regulation of response to stress; GO:0006457 protein folding; GO:1902884 positive regulation of response to oxidative stress; GO:0009893…	GO:0044424 intracellular part; GO:0005623 cell; GO:0044464 cell part; GO:0005622 intracellular; GO:0005737 cytoplasm;	GO:0005524 ATP binding; GO:1901265 nucleoside phosphate binding; GO:0001882 nucleoside binding; GO:0043167 ion binding; GO:0000166 nucleotide binding; GO:0097159 organic cyclic compound binding; GO:1901363 heterocyclic compound binding; GO:0032549 ribonucleoside binding; GO:0097367 carbohydrate derivative binding; GO:0046914 transition metal ion binding; GO:0032553 ribonucleotide binding; GO:0005…			O	Mitochondrial chaperonin
F01_cb2246_c19/f1p1/1549	Cluster1	PREDICTED: Isoflavone reductase-like protein OS=Olea europaea PE=1 SV=1	0.147	Down	0.00115832	0.17	Down	0.00067815	0.676	--	0.098121	0.581	--	0.087438
F01_cb3253_c1/f1p0/2619	Cluster1	hypothetical protein AMTR_s00096p00019400 [Amborella trichopoda]	0.373	Down	0.032077	0.401	Down	0.00032097	0.657	--	0.29194	0.611	--	0.084897			GO:0005515 protein binding; GO:0005488 binding;			R	FOG: PPR repeat
F01_cb10733_c20/f1p0/1059	Cluster1	"""PREDICTED: 25.3 kDa heat shock protein, chloroplastic OS=Arabidopsis thaliana GN=HSP25.3 PE=2 SV=1"""	0.463	Down	0.013858	0.358	Down	0.026364	1.123	--	0.83506	1.451	--	0.173776				atr:s00009p00236890; AMTR_s00009p00236890; hypothetical protein; K13993 HSP20 family protein (A)	ko04141 Protein processing in endoplasmic reticulum;	O	Molecular chaperone (small heat-shock protein Hsp26/Hsp42)
F01_cb10733_c37/f1p0/1057	Cluster1	"""PREDICTED: Small heat shock protein, chloroplastic (Fragment) OS=Glycine max GN=HSP22 PE=2 SV=1"""	0.225	Down	0.00056221	0.213	Down	0.0029573	0.88	--	0.52752	0.928	--	0.64904				atr:s00009p00236890; AMTR_s00009p00236890; hypothetical protein; K13993 HSP20 family protein (A)	ko04141 Protein processing in endoplasmic reticulum;	O	Molecular chaperone (small heat-shock protein Hsp26/Hsp42)
F01_cb5000_c21284/f2p0/2217	Cluster1	PREDICTED: Lipase-like PAD4 OS=Arabidopsis thaliana GN=PAD4 PE=1 SV=1	0.352	Down	0.032483	0.481	Down	0.024076	1.539	--	0.127158	1.126	--	0.6037	GO:0044699 single-organism process; GO:0008152 metabolic process; GO:0044238 primary metabolic process; GO:0044710 single-organism metabolic process; GO:0006629 lipid metabolic process; GO:0071704 organic substance metabolic process;
F02_cb8982_c3/f1p0/1050	Cluster5	unknown [Picea sitchensis]	0.467	Down	0.0159375	0.182	Down	0.00175795	0.212	Down	0.0024612	0.545	Down	0.03376						O	Gamma-interferon inducible lysosomal thiol reductase
F01_cb10424_c1/f1p0/807	Cluster5	unknown [Picea sitchensis]	0.295	Down	0.0020163	0.359	Down	0.022037	0.406	Down	0.0111192	0.333	Down	0.0106826
F01_cb13577_c5/f1p0/488	Cluster5	defensin 3 [Pinus sylvestris]	0.236	Down	0.020523	0.434	Down	0.046723	0.37	Down	0.038976	0.201	Down	0.0115968	GO:0006952 defense response; GO:0050896 response to stimulus; GO:0006950 response to stress;
F01_cb15543_c0/f3p0/1353	Cluster5	"""PREDICTED: 20 kDa chaperonin, chloroplastic OS=Arabidopsis thaliana GN=CPN20 PE=1 SV=2"""	0.32	Down	0.0075985	0.754	Down	0.0023808	0.768	Down	0.03484	0.326	Down	0.035665	GO:0050794 regulation of cellular process; GO:1901671 positive regulation of superoxide dismutase activity; GO:1901033 positive regulation of response to reactive oxygen species; GO:1900409 positive regulation of cellular response to oxidative stress; GO:0080134 regulation of response to stress; GO:0006457 protein folding; GO:1902884 positive regulation of response to oxidative stress; GO:0009893…	GO:0044424 intracellular part; GO:0005623 cell; GO:0044464 cell part; GO:0005622 intracellular; GO:0005737 cytoplasm;	GO:0005524 ATP binding; GO:1901265 nucleoside phosphate binding; GO:0001882 nucleoside binding; GO:0043167 ion binding; GO:0000166 nucleotide binding; GO:0097159 organic cyclic compound binding; GO:1901363 heterocyclic compound binding; GO:0032549 ribonucleoside binding; GO:0097367 carbohydrate derivative binding; GO:0046914 transition metal ion binding; GO:0032553 ribonucleotide binding; GO:0005…			O	Mitochondrial chaperonin
F01_cb5000_c161534/f1p1/2266	Cluster5	PREDICTED: Lipase-like PAD4 OS=Arabidopsis thaliana GN=PAD4 PE=1 SV=1	0.724	Down	0.005039	0.705	Down	0.038063	0.432	Down	0.00117797	0.444	Down	0.00052139	GO:0044699 single-organism process; GO:0008152 metabolic process; GO:0044238 primary metabolic process; GO:0044710 single-organism metabolic process; GO:0006629 lipid metabolic process; GO:0071704 organic substance metabolic process;
F01_cb5320_c2/f2p0/2378	Cluster5	"""PREDICTED: Glutamyl-tRNA(Gln) amidotransferase subunit A, chloroplastic/mitochondrial OS=Zea mays GN=GATA PE=2 SV=1"""	0.177	Down	0.00079722	0.333	Down	0.038478	0.466	Down	0.0039615	0.247	Down	0.0141394						J	Amidases
F01_cb6684_c0/f1p0/2124	Cluster5	PREDICTED: uncharacterized protein LOC101291921 [Fragaria vesca subsp. vesca]	0.479	Down	0.027635	0.679	Down	0.0100577	0.456	Down	0.00062466	0.321	Down	0.0061574
