# Supplementary material for: Physiological, Proteomic, and Resin Yield-Related Genes Expression Analysis Provides Insights into the Mechanisms Regulating Resin Yield in Masson Pine
Source: Int J Mol Sci. 2023 Sep 7;24(18):13813. doi: 10.3390/ijms241813813 (PMC10531451; doi:10.3390/ijms241813813)
Supplement: Supplementary file 1 [file ijms-24-13813-s001.zip › Table S4.xlsx]

## Sheet: Sheet1
Table S4. DEPs involved in terpenoid biosynthesis.
Protein		Description	HM3 vs. LM3			HM8 vs. LM8			HM8 vs. HM3			LM8 vs. LM3
			Ratio	Regulated Type	P value	Ratio	Regulated Type	P value	Ratio	Regulated Type	P value	Ratio	Regulated Type	P value
F01_cb5693_c32/f1p0/1662	AACT	acetyl-CoA acetyltransferase	0.231	no	0.20462	0.721	no	0.120721	7.565	up	0.005783	2.43	no	0.187603
F02_cb2459_c32/f1p0/1516	AACT	acetyl-CoA acetyltransferase	0.786	no	0.5625	--	no	--	--	no	--	--	no	--
F01_cb5182_c21/f1p0/1911	HMGS	hydroxymethylglutaryl-CoA synthase	--	no	--	0.861	no	0.6272	--	no	--	--	no	--
F01_cb5182_c17/f1p0/2237	HMGS	hydroxymethylglutaryl-CoA synthase	0.472	no	0.170203	--	no	--	--	no	--	--	no	--
F01_cb7845_c1/f1p0/1912	MK	mevalonate kinase	0.661	dn	0.022415	0.888	no	0.020479	2.063	up	0.0079601	1.534	up	0.0112019
F01_cb5675_c13/f1p0/1974	PMK	phosphomevalonate kinase	0.618	dn	0.030121	--	no	--	--	no	--	--	no	--
F02_cb9735_c1768/f1p0/2373	PMK	phosphomevalonate kinase	--	no	--	0.998	no	0.97296	--	no	--	--	no	--
F01_cb5675_c9/f1p0/2029	PMK	phosphomevalonate kinase	0.641	no	0.052879	--	no	--	--	no	--	--	no	--
F01_cb621_c9/f1p0/2187	MVD	diphosphomevalonate decarboxylase	--	no	--	1.026	no	0.65004	--	no	--	--	no	--
F01_cb621_c10/f1p0/2184	MVD	diphosphomevalonate decarboxylase	0.445	no	0.195799	--	no	--	--	no	--	--	no	--
F02_cb3988_c30/f1p0/2591	DXS	1-deoxy-D-xylulose-5-phosphate synthase	--	no	--	--	no	--	--	no	--	--	no	--
F01_cb6334_c17/f15p3/1939	DXR	1-deoxy-D-xylulose-5-phosphate reductoisomerase	0.52	no	0.23882	--	no	--	--	no	--	--	no	--
F02_cb1176_c11/f1p0/1479	DXR	1-deoxy-D-xylulose-6-phosphate reductoisomerase	--	no	--	1.016	no	0.981	--	no	--	--	no	--
F01_cb13373_c0/f5p0/1290	MCT	2-C-methyl-D-erythritol 4-phosphate cytidylyltransferase	1.058	no	0.54148	1.115	no	0.24632	0.923	no	0.3627	0.876	no	0.21214
F02_cb12926_c0/f4p0/1443	CMK	4-diphosphocytidyl-2-C-methyl-D-erythritol kinase	0.89	no	0.69838	1.035	no	0.76404	2.04	up	0.0023602	1.754	no	0.092923
F01_cb9730_c8/f1p2/1083	MDS	2-C-methyl-D-erythritol 2, 4-cyclodiphosphate synthase	--	no	--	1.808	up	0.046003	--	no	--	--	no	--
F02_cb3250_c20/f1p0/2877	HDS	(E)-4-hydroxy-3-methylbut-2-enyl-diphosphate synthase	0.612	no	0.152124	0.856	no	0.31934	3.26	up	0.00016078	2.331	up	0.029401
F01_cb7649_c0/f12p2/1836	HDR	4-Hydroxy-3-methylbut-2-enyl-diphosphate reductase	--	no	--	0.935	no	0.6059	--	no	--	--	no	--
F02_cb7998_c6/f1p0/1728	HDR	4-Hydroxy-3-methylbut-3-enyl-diphosphate reductase	0.572	no	0.084817	--	no	--	--	no	--	--	no	--
F02_cb11169_c4/f3p0/1199	IDI	isopentenyl-diphosphate Delta-isomerase	1.088	no	0.59292	1.233	no	0.140978	2.079	up	0.0031225	1.834	up	0.032597
F01_cb5184_c9/f1p0/1817	FPPS	farnesyl pyrophosphate synthase	0.609	no	0.24444	0.829	no	0.092696	3.134	up	0.000122022	2.303	up	0.041636
F01_cb6843_c2/f1p0/2097	GPPS	geranyl diphosphate synthase	--	no	--	1.075	no	0.63464	--	no	--	--	no	--
F01_cb11328_c1/f1p0/1427	GPPS	geranyl diphosphate synthase	--	no	--	--	no	--	--	no	--	--	no	--
F01_cb12073_c2/f1p0/1095	GGPPS	"""isoprenyl diphosphate synthase, partial [Picea glauca]"""	--	no	--	1.687	no	0.29946	--	no	--	--	no	--
F01_cb8726_c14/f1p0/1512	GGPPS	"""isoprenyl diphosphate synthase, partial [Picea glauca]"""	--	no	--	0.94	no	0.57796	--	no	--	--	no	--
F01_cb16002_c0/f2p0/1496	GGPPS	"""isoprenyl diphosphate synthase, partial [Picea glauca]"""	--	no	--	--	no	--	--	no	--	--	no	--
F02_cb7069_c0/f1p0/2146	SesquiTPS	5-germacradien-4-ol synthase	--	no	--	2.215	up	0.0105235	--	no	--	--	no	--
F01_cb5679_c11/f1p3/2137	SesquiTPS	longifolene synthase	--	no	--	0.72	dn	0.029256	--	no	--	--	no	--
F02_cb5853_c7/f1p0/2338	SesquiTPS	longifolene synthase	0.702	no	0.142524	--	no	--	--	no	--	--	no	--
F02_cb4027_c24/f2p0/2098	SesquiTPS	caryophyllene/humulene synthase	--	no	--	0.517	no	0.65472	--	no	--	--	no	--
F02_cb4027_c16/f1p0/1892	SesquiTPS	caryophyllene/humulene synthase	--	no	--	--	no	--	--	no	--	--	no	--
F02_cb4027_c11/f1p0/2126	SesquiTPS	delta-selinene-like synthase	--	no	--	--	no	--	--	no	--	--	no	--
F02_cb6342_c6/f2p1/2159	MonoTPS	(-)-beta-pinene synthase	--	no	--	0.682	dn	0.029581	--	no	--	--	no	--
F01_cb5926_c21/f1p1/2074	MonoTPS	(-)-alpha pinene synthase	1.116	no	0.48906	2.007	no	0.055522	6.787	up	0.00060091	3.773	up	0.0049982
F01_cb4104_c20/f1p0/2179	MonoTPS	(+)-alpha pinene synthase	--	no	--	0.664	no	0.195263	--	no	--	--	no	--
F01_cb4104_c15/f1p2/2105	MonoTPS	alpha-pinene synthase	--	no	--	--	no	--	--	no	--	--	no	--
F01_cb4104_c19/f1p1/2249	MonoTPS	(+)-alpha-pinene synthase	--	no	--	--	no	--	--	no	--	--	no	--
F01_cb5926_c14/f1p0/2203	MonoTPS	2-methyl-3-buten-2-ol synthase	--	no	--	1.106	no	0.96288	--	no	--	--	no	--
F01_cb2519_c10/f1p0/2842	DiTPS	Bifunctional levopimaradiene synthase	--	no	--	1.666	no	0.29438	--	no	--	--	no	--
F02_cb7723_c21/f1p1/1656	CYP450	CYP720B2	--	no	--	0.992	no	0.87316	--	no	--	--	no	--
F01_cb7316_c30/f1p0/1908	CYP450	CYP720B11	--	no	--	--	no	--	--	no	--	--	no	--
F02_cb7723_c12/f1p0/2882	CYP450	CYP720B11	--	no	--	--	no	--	--	no	--	--	no	--
F01_cb7316_c102/f1p2/1822	CYP450	CYP720B12	--	no	--	0.895	no	0.69492	--	no	--	--	no	--
