# Supplementary material for: Physiological, Proteomic, and Resin Yield-Related Genes Expression Analysis Provides Insights into the Mechanisms Regulating Resin Yield in Masson Pine
Source: Int J Mol Sci. 2023 Sep 7;24(18):13813. doi: 10.3390/ijms241813813 (PMC10531451; doi:10.3390/ijms241813813)
Supplement: Supplementary file 1 [file ijms-24-13813-s001.zip › Table S5.xlsx]

## Sheet: Sheet1
Table S5. DEPs referred to GST, ABC, and HSP.
Protein		Description	HM3 vs. LM3			HM8 vs. LM8			HM8 vs. HM3			LM8 vs. LM3
			Ratio	Regulated Type	P value	Ratio	Regulated Type	P value	Ratio	Regulated Type	P value	Ratio	Regulated Type	P value
F02_cb14490_c1/f1p0/1107	GST	glutathione S-transferase	11.418	Up	0.0031415	15.08	Up	0.00015733	1.148	--	0.57206	0.869	--	0.9619
F01_cb12694_c10/f1p0/954	GST	glutathione S-transferase	2.31	Up	5.6391e-05	3.163	Up	0.003005	1.22	--	0.38044	0.891	--	0.076036
F02_cb10002_c27/f1p0/1018	GST	glutathione S-transferase	1.413	Up	0.0117217	--	--	--	--	--	--	--	--	--
F02_cb10002_c21/f1p0/1156	GST	glutathione S-transferase	1.237	Up	0.029997	1.195	--	0.34086	3.822	Up	0.000141701	3.956	Up	0.00135632
F02_cb11460_c1/f1p0/1705	GST	glutathione S-transferase	0.619	Down	0.0037176	--	--	--	--	--	--	--	--	--
F01_cb15688_c0/f1p1/1068	GST	glutathione S-transferase	0.83	--	0.259	1.436	Up	0.039064	2.146	Up	0.0154405	1.24	--	0.169857
F01_cb11524_c2/f1p0/1274	GST	glutathione S-transferase	1.048	--	0.73964	0.601	Down	0.023896	2.497	Up	0.0040043	4.354	Up	0.0025595
F01_cb15481_c1/f1p0/917	GST	glutathione S-transferase	1.327	--	0.162595	1.597	Up	0.048756	1.02	--	0.99816	0.848	--	0.38462
F02_cb10002_c12/f1p4/1266	GST	glutathione S-transferase	--	--	--	3.48	Up	0.000162801	--	--	--	--	--	--
F02_cb8973_c7/f1p0/1228	GST	glutathione S-transferase	1.186	--	0.3922	1.369	Up	0.0147416	0.549	Down	0.0032001	0.476	Down	0.029677
F01_cb12653_c6/f1p0/1068	GST	glutathione S-transferase	0.439	--	0.097704	1.413	--	0.20944	5.179	Up	0.0021599	1.608	--	0.16294
F01_cb15203_c2/f1p0/895	GST	glutathione S-transferase	0.747	--	0.7311	0.529	--	0.150585	0.254	Down	0.0034158	0.358	--	0.11964
F01_cb15203_c0/f1p0/975	GST	glutathione S-transferase	0.891	--	0.85316	1.05	--	0.99382	0.284	Down	0.0107169	0.241	Down	0.0116197
F01_cb10718_c12/f1p2/1242	GST	glutathione S-transferase	0.714	--	0.69414	0.8	--	0.22774	2.365	Up	0.035478	2.11	--	0.11072
F02_cb996_c5/f1p1/2837	ABC	ATP-binding cassette transporter	1.733	Up	0.032381	1.013	--	0.8513	0.384	Down	0.000118874	0.657	--	0.092519
F02_cb345_c64/f1p0/5250	ABC	ATP-binding cassette transporter	2.232	Up	0.0065607	--	--	--	--	--	--	--	--	--
F01_cb13987_c41/f1p4/4184	ABC	ATP-binding cassette transporter	--	--	--	0.665	Down	0.003044	--	--	--	--	--	--
F02_cb2240_c2/f1p0/3145	ABC	ATP-binding cassette transporter	0.923	--	0.825	1.274	Up	0.0193016	1.618	Up	0.0029045	1.172	--	0.40536
F01_cb130_c35/f1p0/4007	ABC	ATP-binding cassette transporter	--	--	--	1.48	Up	0.046644	--	--	--	--	--	--
F02_cb9389_c126/f1p1/933	HSP	heat shock protein	7.374	Up	2.4968e-05	5.438	Up	0.00059733	1.179	--	0.4616	1.599	Up	0.0057189
F02_cb15292_c2/f7p2/1093	HSP	heat shock protein	30.039	Up	0.00186424	12.093	--	--	1.231	--	0.96408	3.058	--	--
F01_cb10396_c14/f1p0/1288	HSP	heat shock protein	0.104	Down	0.00149745	0.217	Down	0.000164106	2.076	Up	0.0097244	0.993	--	0.86262
F01_cb10733_c20/f1p0/1059	HSP	heat shock protein	0.463	Down	0.013858	0.358	Down	0.026364	1.123	--	0.83506	1.451	--	0.173776
F01_cb11134_c0/f4p1/878	HSP	heat shock protein	0.08	Down	0.00053768	0.296	Down	0.0092987	0.999	--	0.884	0.269	Down	0.0093355
F02_cb11310_c1/f1p0/886	HSP	heat shock protein	1.724	Up	0.00162116	1.211	--	0.39836	0.979	--	0.81116	1.394	--	0.132141
F02_cb13625_c3/f1p0/967	HSP	heat shock protein	5.506	Up	0.0003825	7.611	Up	0.00069598	0.429	Down	0.0027433	0.311	Down	0.0071575
F01_cb10733_c37/f1p0/1057	HSP	heat shock protein	0.225	Down	0.00056221	0.213	Down	0.0029573	0.88	--	0.52752	0.928	--	0.64904
F02_cb13304_c4/f1p0/1005	HSP	heat shock protein	2.354	Up	0.0051769	0.964	--	0.71852	0.312	Down	0.00164111	0.763	--	0.083023
F02_cb12652_c24/f1p0/657	HSP	heat shock protein	4.246	Up	0.028359	--	--	--	--	--	--	--	--	--
F02_cb12652_c15/f2p0/911	HSP	heat shock protein	--	--	--	2.695	Up	0.00057693	--	--	--	--	--	--
F02_cb9389_c68/f3p2/895	HSP	heat shock protein	1.183	--	0.46198	1.571	Up	0.041925	1.005	--	0.9427	0.757	--	0.52098
F01_cb8839_c11/f1p0/877	HSP	heat shock protein	--	--	--	0.605	Down	0.020836	--	--	--	--	--	--
F02_cb11310_c0/f3p0/770	HSP	heat shock protein	0.567	--	0.085856	0.644	Down	0.0025194	0.972	--	0.93962	0.856	--	0.58166
F02_cb11647_c3/f1p0/842	HSP	heat shock protein	1.234	--	0.47584	1.263	Up	0.0021245	0.766	--	0.35034	0.749	--	0.33558
F01_cb12475_c19/f1p0/724	HSP	heat shock protein	--	--	--	0.445	Down	0.00024046	--	--	--	--	--	--
F01_cb12475_c6/f2p0/1071	HSP	heat shock protein	0.722	--	0.182778	0.41	Down	0.0031832	0.948	--	0.87902	1.667	Up	0.044537
F02_cb12652_c25/f1p0/773	HSP	heat shock protein	--	--	--	2.829	Up	0.0118612	--	--	--	--	--	--
F01_cb11465_c0/f4p0/947	HSP	heat shock protein	1.042	--	0.75018	0.41	Down	0.003463	0.742	--	0.127497	1.885	Up	0.023522
F02_cb9389_c60/f4p0/632	HSP	heat shock protein	--	--	--	2.481	Up	0.0053049	--	--	--	--	--	--
F02_cb16304_c1/f1p0/564	HSP	heat shock protein	0.7	--	0.3358	0.633	Down	0.0041628	0.551	Down	0.0157564	0.609	--	0.165596
F02_cb13304_c1/f2p0/854	HSP	heat shock protein	0.664	--	0.21916	0.688	--	0.072082	0.456	Down	0.0120436	0.44	Down	0.032159
F02_cb14783_c1/f1p0/802	HSP	heat shock protein	0.689	--	0.6198	0.792	--	0.23738	0.7	Down	0.0147428	0.609	--	0.4466
F02_cb14374_c3/f1p2/1268	HSP	heat shock protein	1.453	--	0.171599	1.538	--	0.39306	0.342	Down	0.026737	0.323	Down	0.031824
F01_cb11856_c2/f3p0/1144	HSP	heat shock protein	0.824	--	0.42362	0.686	--	0.050861	0.658	Down	0.043383	0.79	--	0.33074
F01_cb14243_c8/f1p0/804	HSP	heat shock protein	1.253	--	0.35356	1.088	--	0.35848	0.468	Down	0.00108469	0.539	--	0.21638
F02_cb12652_c47/f3p2/860	HSP	heat shock protein	1.755	--	0.173502	1.336	--	0.135023	0.39	Down	0.00168353	0.513	--	0.36724
F02_cb12652_c27/f1p1/738	HSP	heat shock protein	1.207	--	0.44496	1.135	--	0.2829	0.742	Down	0.02386	0.789	--	0.64128
F02_cb13686_c19/f1p0/819	HSP	heat shock protein	0.948	--	0.64584	0.888	--	0.062944	1.225	Up	0.028355	1.308	--	0.088422
F01_cb14282_c0/f2p0/762	HSP	heat shock protein	0.882	--	0.6704	0.605	--	0.061559	0.493	Down	0.0184432	0.72	--	0.24208
F02_cb12972_c5/f1p0/705	HSP	heat shock protein	0.991	--	0.81328	0.565	--	0.073024	0.261	Down	0.0074203	0.457	--	0.114481
F01_cb13287_c13/f1p0/966	HSP	heat shock protein	1.23	--	0.3594	0.842	--	0.25168	0.435	Down	0.00109526	0.636	--	0.22658
F02_cb15292_c19/f1p1/1046	HSP	heat shock protein	1.334	--	0.32492	0.425	--	0.100237	0.825	--	0.4989	2.589	Up	0.0184604
F01_cb10733_c24/f1p0/1135	HSP	heat shock protein	1.24	--	0.5378	0.633	--	0.21946	1.492	--	0.38806	2.925	Up	0.030302
F01_cb15089_c3/f1p0/1559	HSP	heat shock protein	1.139	--	0.2835	1.879	--	0.43272	0.729	--	0.39404	0.442	Down	0.047838
F01_cb15729_c3/f2p0/1137	HSP	heat shock protein	1.372	--	0.234	1.27	--	0.68588	0.214	--	0.069422	0.232	Down	0.049164
F02_cb13686_c13/f1p0/800	HSP	heat shock protein	1.142	--	0.47618	0.931	--	0.64972	1.398	--	0.079361	1.715	Up	0.0145561
