# Supplementary material for: Physiological, Proteomic, and Resin Yield-Related Genes Expression Analysis Provides Insights into the Mechanisms Regulating Resin Yield in Masson Pine
Source: Int J Mol Sci. 2023 Sep 7;24(18):13813. doi: 10.3390/ijms241813813 (PMC10531451; doi:10.3390/ijms241813813)
Supplement: Supplementary file 1 [file ijms-24-13813-s001.zip › Table S6.xlsx]

## Sheet: Sheet1
Table S6. DEPs related to plant hormone biosynthesis and signal transduction.
Protein		Description	HM3 vs. LM3			HM8 vs. LM8			HM8 vs. HM3			LM8 vs. LM3			Biological Process	Cellular Component	Molecular Function	KEGG Gene	KEGG pathway	KOG category	KOG description
			Ratio	Regulated Type	P value	Ratio	Regulated Type	P value	Ratio	Regulated Type	P value	Ratio	Regulated Type	P value
F02_cb7997_c11/f1p0/1751	JA	"""PREDICTED: Acyl-coenzyme A oxidase 4, peroxisomal OS=Arabidopsis thaliana GN=ACX4 PE=1 SV=1"""	0.333	Down	0.039644	0.548	Down	0.0023761	4.791	Up	0.0022612	2.91	--	0.057218	GO:0044699 single-organism process; GO:0008152 metabolic process; GO:0055114 oxidation-reduction process; GO:0044710 single-organism metabolic process;	--	GO:1901265 nucleoside phosphate binding; GO:0050660 flavin adenine dinucleotide binding; GO:0043167 ion binding; GO:0000166 nucleotide binding; GO:0048037 cofactor binding; GO:0016491 oxidoreductase activity; GO:0016627 oxidoreductase activity, acting on the CH-CH group of donors; GO:1901363 heterocyclic compound binding; GO:0097159 organic cyclic compound binding; GO:0003824 catalytic activity; …	csv:101209181; acyl-coenzyme A oxidase 4, peroxisomal-like; K00232 acyl-CoA oxidase [EC:1.3.3.6] (A)	ko04146 Peroxisome; ko00592 alpha-Linolenic acid metabolism; ko00071 Fatty acid degradation; ko01212 Fatty acid metabolism; ko01040 Biosynthesis of unsaturated fatty acids;	E	Glutaryl-CoA dehydrogenase
F02_cb9735_c123326/f1p0/2039	JA	"""PREDICTED: 3-ketoacyl-CoA thiolase 2, peroxisomal OS=Arabidopsis thaliana GN=PED1 PE=1 SV=2"""	0.385	Down	0.020984	--	--	--	--	--	--	--	--	--	GO:0008152 metabolic process;	--	GO:0016746 transferase activity, transferring acyl groups; GO:0016747 transferase activity, transferring acyl groups other than amino-acyl groups; GO:0003824 catalytic activity; GO:0016740 transferase activity;	sly:101255924; 3-ketoacyl-CoA thiolase 2, peroxisomal; K07513 acetyl-CoA acyltransferase 1 [EC:2.3.1.16] (A)	ko00280 Valine, leucine and isoleucine degradation; ko04146 Peroxisome; ko00592 alpha-Linolenic acid metabolism; ko00071 Fatty acid degradation; ko01212 Fatty acid metabolism; ko01040 Biosynthesis of unsaturated fatty acids;	I	3-oxoacyl CoA thiolase
F02_cb1278_c23/f1p0/3454	JA	"""PREDICTED: Lipoxygenase 6, chloroplastic OS=Arabidopsis thaliana GN=LOX6 PE=2 SV=1"""	1.542	Up	0.042922	--	--	--	--	--	--	--	--	--	GO:0044699 single-organism process; GO:0008152 metabolic process; GO:0055114 oxidation-reduction process; GO:0044710 single-organism metabolic process;	--	GO:0016702 oxidoreductase activity, acting on single donors with incorporation of molecular oxygen, incorporation of two atoms of oxygen; GO:0016701 oxidoreductase activity, acting on single donors with incorporation of molecular oxygen; GO:0003824 catalytic activity; GO:0005488 binding; GO:0051213 dioxygenase activity; GO:0043167 ion binding; GO:0043169 cation binding; GO:0046872 metal ion bindi…	pop:POPTR_0001s16780g; hypothetical protein; K00454 lipoxygenase [EC:1.13.11.12] (A)	ko00592 alpha-Linolenic acid metabolism; ko00591 Linoleic acid metabolism;	--	--
F01_cb4533_c10/f1p1/2397	JA	PREDICTED: 4-coumarateNACoA ligase-like 5 OS=Arabidopsis thaliana GN=4CLL5 PE=1 SV=2	0.992	--	0.99142	1.382	Up	0.045719	2.698	Up	0.00056197	1.936	Up	0.0099626	GO:0008152 metabolic process;	--	GO:0003824 catalytic activity;	atr:s00001p00238960; AMTR_s00001p00238960; hypothetical protein; K10526 OPC-8:0 CoA ligase 1 [EC:6.2.1.-] (A)	ko00592 alpha-Linolenic acid metabolism;	I	Acyl-CoA synthetase
F02_cb10834_c6/f2p0/1745	JA	PREDICTED: 12-oxophytodienoate reductase 1 OS=Solanum lycopersicum GN=OPR1 PE=1 SV=1	0.491	--	0.095142	0.675	Down	0.0098833	1.479	Up	0.021883	1.077	--	0.63276	GO:0044699 single-organism process; GO:0008152 metabolic process; GO:0055114 oxidation-reduction process; GO:0044710 single-organism metabolic process;	--	GO:0097159 organic cyclic compound binding; GO:1901363 heterocyclic compound binding; GO:0097367 carbohydrate derivative binding; GO:1901265 nucleoside phosphate binding; GO:0003824 catalytic activity; GO:0032553 ribonucleotide binding; GO:0005488 binding; GO:0043167 ion binding; GO:0043168 anion binding; GO:0000166 nucleotide binding; GO:0010181 FMN binding; GO:0048037 cofactor binding; GO:00164…	cit:102622863; 12-oxophytodienoate reductase 2-like; K05894 12-oxophytodienoic acid reductase [EC:1.3.1.42] (A)	ko00592 alpha-Linolenic acid metabolism;	CR	NADH:flavin oxidoreductase/12-oxophytodienoate reductase
F01_cb6767_c12/f7p1/2065	JA	"""PREDICTED: 3-ketoacyl-CoA thiolase 2, peroxisomal OS=Arabidopsis thaliana GN=PED1 PE=1 SV=2"""	--	--	--	0.237	Down	0.0100009	--	--	--	--	--	--	GO:0008152 metabolic process;	--	GO:0016746 transferase activity, transferring acyl groups; GO:0016747 transferase activity, transferring acyl groups other than amino-acyl groups; GO:0003824 catalytic activity; GO:0016740 transferase activity;	sly:101255924; 3-ketoacyl-CoA thiolase 2, peroxisomal; K07513 acetyl-CoA acyltransferase 1 [EC:2.3.1.16] (A)	ko00280 Valine, leucine and isoleucine degradation; ko04146 Peroxisome; ko00592 alpha-Linolenic acid metabolism; ko00071 Fatty acid degradation; ko01212 Fatty acid metabolism; ko01040 Biosynthesis of unsaturated fatty acids;	I	3-oxoacyl CoA thiolase
F01_cb2399_c15/f1p2/2939	JA	"""PREDICTED: acyl-coenzyme A oxidase 2, peroxisomal [Nelumbo nucifera]"""	--	--	--	1.478	Up	0.046717	--	--	--	--	--	--	GO:0034440 lipid oxidation; GO:0044699 single-organism process; GO:0044255 cellular lipid metabolic process; GO:0044237 cellular metabolic process; GO:0071704 organic substance metabolic process; GO:0008152 metabolic process; GO:0030258 lipid modification; GO:0044248 cellular catabolic process; GO:0032787 monocarboxylic acid metabolic process; GO:0009987 cellular process; GO:0006629 lipid metabol…	GO:0043226 organelle; GO:0043231 intracellular membrane-bounded organelle; GO:0043229 intracellular organelle; GO:0044464 cell part; GO:0005622 intracellular; GO:0005777 peroxisome; GO:0042579 microbody; GO:0005737 cytoplasm; GO:0044424 intracellular part; GO:0005623 cell; GO:0043227 membrane-bounded organelle; GO:0044444 cytoplasmic part;	GO:0016634 oxidoreductase activity, acting on the CH-CH group of donors, oxygen as acceptor; GO:1901265 nucleoside phosphate binding; GO:0050660 flavin adenine dinucleotide binding; GO:0043167 ion binding; GO:0003997 acyl-CoA oxidase activity; GO:0000166 nucleotide binding; GO:0048037 cofactor binding; GO:0016491 oxidoreductase activity; GO:0016627 oxidoreductase activity, acting on the CH-CH gro…	csv:101209181; acyl-coenzyme A oxidase 4, peroxisomal-like; K00232 acyl-CoA oxidase [EC:1.3.3.6] (A)	ko04146 Peroxisome; ko00592 alpha-Linolenic acid metabolism; ko00071 Fatty acid degradation; ko01212 Fatty acid metabolism; ko01040 Biosynthesis of unsaturated fatty acids;	IQ	Pristanoyl-CoA/acyl-CoA oxidase
F01_cb5092_c2/f1p0/2381	JA	"""PREDICTED: 3-ketoacyl-CoA thiolase 2, peroxisomal OS=Arabidopsis thaliana GN=PED1 PE=1 SV=2"""	0.169	--	0.177085	0.574	Down	0.0020026	8.663	Up	3.34e-06	2.548	--	0.20698	GO:0008152 metabolic process;	--	GO:0016746 transferase activity, transferring acyl groups; GO:0016747 transferase activity, transferring acyl groups other than amino-acyl groups; GO:0016740 transferase activity; GO:0003824 catalytic activity;	sly:101255924; 3-ketoacyl-CoA thiolase 2, peroxisomal; K07513 acetyl-CoA acyltransferase 1 [EC:2.3.1.16] (A)	ko00280 Valine, leucine and isoleucine degradation; ko04146 Peroxisome; ko00592 alpha-Linolenic acid metabolism; ko00071 Fatty acid degradation; ko01212 Fatty acid metabolism; ko01040 Biosynthesis of unsaturated fatty acids;	I	3-oxoacyl CoA thiolase
F02_cb9735_c9030/f4p2/2792	JA	PREDICTED: Peroxisomal fatty acid beta-oxidation multifunctional protein OS=Oryza sativa subsp. japonica GN=MFP PE=1 SV=2	0.32	--	0.115537	0.501	Down	0.00195532	4.95	Up	0.0034617	3.161	Up	0.044918	GO:0055114 oxidation-reduction process; GO:0044281 small molecule metabolic process; GO:0044763 single-organism cellular process; GO:0044699 single-organism process; GO:0044255 cellular lipid metabolic process; GO:0006631 fatty acid metabolic process; GO:0044238 primary metabolic process; GO:0044237 cellular metabolic process; GO:0071704 organic substance metabolic process; GO:0008152 metabolic p…	--	GO:0016614 oxidoreductase activity, acting on CH-OH group of donors; GO:0016616 oxidoreductase activity, acting on the CH-OH group of donors, NAD or NADP as acceptor; GO:0003857 3-hydroxyacyl-CoA dehydrogenase activity; GO:0003824 catalytic activity; GO:0016491 oxidoreductase activity;	pda:103696074; peroxisomal fatty acid beta-oxidation multifunctional protein-like; K10527 enoyl-CoA hydratase/3-hydroxyacyl-CoA dehydrogenase [EC:4.2.1.17 1.1.1.35 1.1.1.211] (A)	ko00592 alpha-Linolenic acid metabolism; ko00071 Fatty acid degradation; ko01212 Fatty acid metabolism;	I	Hydroxyacyl-CoA dehydrogenase/enoyl-CoA hydratase
F01_cb1952_c6/f1p1/2947	JA	PREDICTED: Glyoxysomal fatty acid beta-oxidation multifunctional protein MFP-a OS=Cucumis sativus PE=1 SV=1	0.451	--	0.065839	0.542	Down	0.00064437	3.182	Up	0.00032022	2.645	--	0.066057	GO:0055114 oxidation-reduction process; GO:0044281 small molecule metabolic process; GO:0044763 single-organism cellular process; GO:0044699 single-organism process; GO:0044255 cellular lipid metabolic process; GO:0006631 fatty acid metabolic process; GO:0044238 primary metabolic process; GO:0044237 cellular metabolic process; GO:0071704 organic substance metabolic process; GO:0008152 metabolic p…	--	GO:0016614 oxidoreductase activity, acting on CH-OH group of donors; GO:0016616 oxidoreductase activity, acting on the CH-OH group of donors, NAD or NADP as acceptor; GO:0003857 3-hydroxyacyl-CoA dehydrogenase activity; GO:0003824 catalytic activity; GO:0016491 oxidoreductase activity;	pda:103696074; peroxisomal fatty acid beta-oxidation multifunctional protein-like; K10527 enoyl-CoA hydratase/3-hydroxyacyl-CoA dehydrogenase [EC:4.2.1.17 1.1.1.35 1.1.1.211] (A)	ko00592 alpha-Linolenic acid metabolism; ko00071 Fatty acid degradation; ko01212 Fatty acid metabolism;	I	Hydroxyacyl-CoA dehydrogenase/enoyl-CoA hydratase
F01_cb4578_c28/f2p1/1909	JA	PREDICTED: Alcohol dehydrogenase 2 OS=Solanum tuberosum GN=ADH2 PE=2 SV=1	0.591	--	0.098063	0.38	Down	1.7e-05	1.001	--	0.95316	1.557	--	0.158199	GO:0044699 single-organism process; GO:0008152 metabolic process; GO:0055114 oxidation-reduction process; GO:0044710 single-organism metabolic process;	--	GO:0046914 transition metal ion binding; GO:0003824 catalytic activity; GO:0005488 binding; GO:0043167 ion binding; GO:0046872 metal ion binding; GO:0043169 cation binding; GO:0008270 zinc ion binding; GO:0016491 oxidoreductase activity;	pvu:PHAVU_009G149500g; hypothetical protein; K18857 alcohol dehydrogenase class-P [EC:1.1.1.1] (A)	ko00010 Glycolysis / Gluconeogenesis; ko00592 alpha-Linolenic acid metabolism; ko00071 Fatty acid degradation; ko00350 Tyrosine metabolism;	Q	Alcohol dehydrogenase, class III
F01_cb5521_c0/f2p0/2338	JA	PREDICTED: Peroxisomal acyl-coenzyme A oxidase 1 OS=Arabidopsis thaliana GN=ACX1 PE=1 SV=1	--	--	--	0.707	Down	0.009024	--	--	--	--	--	--	GO:0034440 lipid oxidation; GO:0044699 single-organism process; GO:0044255 cellular lipid metabolic process; GO:0044237 cellular metabolic process; GO:0071704 organic substance metabolic process; GO:0008152 metabolic process; GO:0030258 lipid modification; GO:0044248 cellular catabolic process; GO:0032787 monocarboxylic acid metabolic process; GO:0009987 cellular process; GO:0006629 lipid metabol…	GO:0043226 organelle; GO:0043231 intracellular membrane-bounded organelle; GO:0043229 intracellular organelle; GO:0044464 cell part; GO:0005622 intracellular; GO:0005777 peroxisome; GO:0042579 microbody; GO:0005737 cytoplasm; GO:0044424 intracellular part; GO:0005623 cell; GO:0043227 membrane-bounded organelle; GO:0044444 cytoplasmic part;	GO:0016634 oxidoreductase activity, acting on the CH-CH group of donors, oxygen as acceptor; GO:1901265 nucleoside phosphate binding; GO:0050660 flavin adenine dinucleotide binding; GO:0043167 ion binding; GO:0003997 acyl-CoA oxidase activity; GO:0000166 nucleotide binding; GO:0048037 cofactor binding; GO:0016491 oxidoreductase activity; GO:0016627 oxidoreductase activity, acting on the CH-CH gro…	csv:101209181; acyl-coenzyme A oxidase 4, peroxisomal-like; K00232 acyl-CoA oxidase [EC:1.3.3.6] (A)	ko04146 Peroxisome; ko00592 alpha-Linolenic acid metabolism; ko00071 Fatty acid degradation; ko01212 Fatty acid metabolism; ko01040 Biosynthesis of unsaturated fatty acids;	I	Acyl-CoA oxidase
F01_cb2815_c167/f1p9/2865	JA	PREDICTED: Peroxisomal fatty acid beta-oxidation multifunctional protein OS=Oryza sativa subsp. japonica GN=MFP PE=1 SV=2	0.423	--	0.089256	0.398	Down	0.00143606	2.781	Up	0.0155191	2.955	Up	0.0168769	GO:0055114 oxidation-reduction process; GO:0044281 small molecule metabolic process; GO:0044763 single-organism cellular process; GO:0044699 single-organism process; GO:0044255 cellular lipid metabolic process; GO:0006631 fatty acid metabolic process; GO:0044238 primary metabolic process; GO:0044237 cellular metabolic process; GO:0071704 organic substance metabolic process; GO:0008152 metabolic p…	--	GO:0016614 oxidoreductase activity, acting on CH-OH group of donors; GO:0016616 oxidoreductase activity, acting on the CH-OH group of donors, NAD or NADP as acceptor; GO:0003857 3-hydroxyacyl-CoA dehydrogenase activity; GO:0003824 catalytic activity; GO:0016491 oxidoreductase activity;	pda:103696074; peroxisomal fatty acid beta-oxidation multifunctional protein-like; K10527 enoyl-CoA hydratase/3-hydroxyacyl-CoA dehydrogenase [EC:4.2.1.17 1.1.1.35 1.1.1.211] (A)	ko00592 alpha-Linolenic acid metabolism; ko00071 Fatty acid degradation; ko01212 Fatty acid metabolism;	I	Hydroxyacyl-CoA dehydrogenase/enoyl-CoA hydratase
F01_cb4962_c22/f6p3/2385	JA	hypothetical protein AMTR_s00001p00238960 [Amborella trichopoda]	0.199	--	0.073582	0.468	Down	0.0044178	7.552	Up	0.0010767	3.218	--	0.127037	GO:0008152 metabolic process;	--	GO:0003824 catalytic activity;	atr:s00001p00238960; AMTR_s00001p00238960; hypothetical protein; K10526 OPC-8:0 CoA ligase 1 [EC:6.2.1.-] (A)	ko00592 alpha-Linolenic acid metabolism;	I	Acyl-CoA synthetase
F01_cb1829_c10/f1p2/2513	JA	PREDICTED: peroxisomal acyl-coenzyme A oxidase 1-like [Nelumbo nucifera]	--	--	--	0.589	Down	0.00125531	--	--	--	--	--	--	GO:0034440 lipid oxidation; GO:0044699 single-organism process; GO:0044255 cellular lipid metabolic process; GO:0044237 cellular metabolic process; GO:0071704 organic substance metabolic process; GO:0008152 metabolic process; GO:0030258 lipid modification; GO:0044248 cellular catabolic process; GO:0032787 monocarboxylic acid metabolic process; GO:0009987 cellular process; GO:0006629 lipid metabol…	GO:0043226 organelle; GO:0043231 intracellular membrane-bounded organelle; GO:0043229 intracellular organelle; GO:0044464 cell part; GO:0005622 intracellular; GO:0005777 peroxisome; GO:0042579 microbody; GO:0005737 cytoplasm; GO:0044424 intracellular part; GO:0005623 cell; GO:0043227 membrane-bounded organelle; GO:0044444 cytoplasmic part;	GO:0016634 oxidoreductase activity, acting on the CH-CH group of donors, oxygen as acceptor; GO:1901265 nucleoside phosphate binding; GO:0050660 flavin adenine dinucleotide binding; GO:0043167 ion binding; GO:0003997 acyl-CoA oxidase activity; GO:0000166 nucleotide binding; GO:0048037 cofactor binding; GO:0016491 oxidoreductase activity; GO:0016627 oxidoreductase activity, acting on the CH-CH gro…	csv:101209181; acyl-coenzyme A oxidase 4, peroxisomal-like; K00232 acyl-CoA oxidase [EC:1.3.3.6] (A)	ko04146 Peroxisome; ko00592 alpha-Linolenic acid metabolism; ko00071 Fatty acid degradation; ko01212 Fatty acid metabolism; ko01040 Biosynthesis of unsaturated fatty acids;	I	Acyl-CoA oxidase
F02_cb10834_c21/f1p0/1771	JA	PREDICTED: 12-oxophytodienoate reductase 1 OS=Solanum lycopersicum GN=OPR1 PE=1 SV=1	1.309	--	0.24462	1.363	Up	0.020317	1.812	Up	0.0024626	1.741	--	0.058515	GO:0044699 single-organism process; GO:0008152 metabolic process; GO:0055114 oxidation-reduction process; GO:0044710 single-organism metabolic process;	--	GO:0097159 organic cyclic compound binding; GO:1901363 heterocyclic compound binding; GO:0097367 carbohydrate derivative binding; GO:1901265 nucleoside phosphate binding; GO:0003824 catalytic activity; GO:0032553 ribonucleotide binding; GO:0005488 binding; GO:0043167 ion binding; GO:0043168 anion binding; GO:0000166 nucleotide binding; GO:0010181 FMN binding; GO:0048037 cofactor binding; GO:00164…	cit:102622863; 12-oxophytodienoate reductase 2-like; K05894 12-oxophytodienoic acid reductase [EC:1.3.1.42] (A)	ko00592 alpha-Linolenic acid metabolism;	CR	NADH:flavin oxidoreductase/12-oxophytodienoate reductase
F02_cb7997_c8/f2p1/1846	JA	"""PREDICTED: Acyl-coenzyme A oxidase 4, peroxisomal OS=Arabidopsis thaliana GN=ACX4 PE=1 SV=1"""	0.499	--	0.05748	0.589	Down	0.0037588	2.825	Up	0.000138424	2.396	Up	0.0068409	GO:0044699 single-organism process; GO:0008152 metabolic process; GO:0055114 oxidation-reduction process; GO:0044710 single-organism metabolic process;	--	GO:0016627 oxidoreductase activity, acting on the CH-CH group of donors; GO:0003995 acyl-CoA dehydrogenase activity; GO:0003824 catalytic activity; GO:0016491 oxidoreductase activity;	csv:101209181; acyl-coenzyme A oxidase 4, peroxisomal-like; K00232 acyl-CoA oxidase [EC:1.3.3.6] (A)	ko04146 Peroxisome; ko00592 alpha-Linolenic acid metabolism; ko00071 Fatty acid degradation; ko01212 Fatty acid metabolism; ko01040 Biosynthesis of unsaturated fatty acids;	E	Glutaryl-CoA dehydrogenase
F02_cb9492_c28/f1p1/1632	JA	"""PREDICTED: 3-ketoacyl-CoA thiolase 2, peroxisomal OS=Arabidopsis thaliana GN=PED1 PE=1 SV=2"""	0.767	--	0.055704	0.623	Down	0.006879	1.031	--	0.76874	1.269	Up	0.031081	GO:0008152 metabolic process;	--	GO:0016746 transferase activity, transferring acyl groups; GO:0016747 transferase activity, transferring acyl groups other than amino-acyl groups; GO:0016740 transferase activity; GO:0003824 catalytic activity;	sly:101255924; 3-ketoacyl-CoA thiolase 2, peroxisomal; K07513 acetyl-CoA acyltransferase 1 [EC:2.3.1.16] (A)	ko00280 Valine, leucine and isoleucine degradation; ko04146 Peroxisome; ko00592 alpha-Linolenic acid metabolism; ko00071 Fatty acid degradation; ko01212 Fatty acid metabolism; ko01040 Biosynthesis of unsaturated fatty acids;	I	3-oxoacyl CoA thiolase
F01_cb4962_c15/f1p1/2271	JA	hypothetical protein AMTR_s00001p00238960 [Amborella trichopoda]	0.454	--	0.114295	0.31	Down	0.000139362	1.753	Up	0.0060644	2.566	--	0.091902	GO:0008152 metabolic process;	--	GO:0003824 catalytic activity;	atr:s00001p00238960; AMTR_s00001p00238960; hypothetical protein; K10526 OPC-8:0 CoA ligase 1 [EC:6.2.1.-] (A)	ko00592 alpha-Linolenic acid metabolism;	I	Acyl-CoA synthetase
F02_cb9735_c148292/f2p1/2048	JA	PREDICTED: Alcohol dehydrogenase 2 OS=Solanum tuberosum GN=ADH2 PE=2 SV=1	0.472	--	0.23878	1.086	--	0.49488	3.707	Up	0.00092246	1.611	--	0.22288	GO:0044699 single-organism process; GO:0008152 metabolic process; GO:0055114 oxidation-reduction process; GO:0044710 single-organism metabolic process;	--	GO:0046914 transition metal ion binding; GO:0003824 catalytic activity; GO:0005488 binding; GO:0043167 ion binding; GO:0046872 metal ion binding; GO:0043169 cation binding; GO:0008270 zinc ion binding; GO:0016491 oxidoreductase activity;	pvu:PHAVU_009G149500g; hypothetical protein; K18857 alcohol dehydrogenase class-P [EC:1.1.1.1] (A)	ko00010 Glycolysis / Gluconeogenesis; ko00592 alpha-Linolenic acid metabolism; ko00071 Fatty acid degradation; ko00350 Tyrosine metabolism;	Q	Alcohol dehydrogenase, class III
F02_cb2363_c6/f1p0/2896	JA	predicted protein [Physcomitrella patens]	0.533	--	0.178762	0.807	--	0.067862	3.294	Up	0.00059548	2.178	--	0.116142	GO:0055114 oxidation-reduction process; GO:0044281 small molecule metabolic process; GO:0044763 single-organism cellular process; GO:0044699 single-organism process; GO:0044255 cellular lipid metabolic process; GO:0006631 fatty acid metabolic process; GO:0044238 primary metabolic process; GO:0044237 cellular metabolic process; GO:0071704 organic substance metabolic process; GO:0008152 metabolic p…	--	GO:0016614 oxidoreductase activity, acting on CH-OH group of donors; GO:0016616 oxidoreductase activity, acting on the CH-OH group of donors, NAD or NADP as acceptor; GO:0003857 3-hydroxyacyl-CoA dehydrogenase activity; GO:0003824 catalytic activity; GO:0016491 oxidoreductase activity;	pda:103696074; peroxisomal fatty acid beta-oxidation multifunctional protein-like; K10527 enoyl-CoA hydratase/3-hydroxyacyl-CoA dehydrogenase [EC:4.2.1.17 1.1.1.35 1.1.1.211] (A)	ko00592 alpha-Linolenic acid metabolism; ko00071 Fatty acid degradation; ko01212 Fatty acid metabolism;	I	Hydroxyacyl-CoA dehydrogenase/enoyl-CoA hydratase
F01_cb4962_c5/f1p3/2198	JA	hypothetical protein AMTR_s00001p00238960 [Amborella trichopoda]	0.461	--	0.26458	0.883	--	0.44866	4.363	Up	0.0027635	2.281	--	0.160718	GO:0008152 metabolic process;	--	GO:0003824 catalytic activity;	atr:s00001p00238960; AMTR_s00001p00238960; hypothetical protein; K10526 OPC-8:0 CoA ligase 1 [EC:6.2.1.-] (A)	ko00592 alpha-Linolenic acid metabolism;	I	Acyl-CoA synthetase
F01_cb6767_c26/f1p0/1937	JA	"""PREDICTED: 3-ketoacyl-CoA thiolase 1, peroxisomal OS=Arabidopsis thaliana GN=KAT1 PE=2 SV=2"""	0.457	--	0.0898	0.644	--	0.127364	5.29	Up	0.00134096	3.756	Up	0.044177	--	--	--	sly:101255924; 3-ketoacyl-CoA thiolase 2, peroxisomal; K07513 acetyl-CoA acyltransferase 1 [EC:2.3.1.16] (A)	ko00280 Valine, leucine and isoleucine degradation; ko04146 Peroxisome; ko00592 alpha-Linolenic acid metabolism; ko00071 Fatty acid degradation; ko01212 Fatty acid metabolism; ko01040 Biosynthesis of unsaturated fatty acids;	I	3-oxoacyl CoA thiolase
F01_cb4127_c0/f6p1/2544	JA	"""PREDICTED: Acyl-coenzyme A oxidase 3, peroxisomal OS=Arabidopsis thaliana GN=ACX3 PE=1 SV=1"""	0.456	--	0.196458	0.769	--	0.08036	5.077	Up	0.000178252	3.011	--	0.076236	GO:0034440 lipid oxidation; GO:0044699 single-organism process; GO:0044255 cellular lipid metabolic process; GO:0044237 cellular metabolic process; GO:0071704 organic substance metabolic process; GO:0008152 metabolic process; GO:0030258 lipid modification; GO:0044248 cellular catabolic process; GO:0032787 monocarboxylic acid metabolic process; GO:0009987 cellular process; GO:0006629 lipid metabol…	GO:0043226 organelle; GO:0043231 intracellular membrane-bounded organelle; GO:0043229 intracellular organelle; GO:0044464 cell part; GO:0005622 intracellular; GO:0005777 peroxisome; GO:0042579 microbody; GO:0005737 cytoplasm; GO:0044424 intracellular part; GO:0005623 cell; GO:0043227 membrane-bounded organelle; GO:0044444 cytoplasmic part;	GO:0016634 oxidoreductase activity, acting on the CH-CH group of donors, oxygen as acceptor; GO:1901265 nucleoside phosphate binding; GO:0050660 flavin adenine dinucleotide binding; GO:0043167 ion binding; GO:0003997 acyl-CoA oxidase activity; GO:0000166 nucleotide binding; GO:0048037 cofactor binding; GO:0016491 oxidoreductase activity; GO:0016627 oxidoreductase activity, acting on the CH-CH gro…	csv:101209181; acyl-coenzyme A oxidase 4, peroxisomal-like; K00232 acyl-CoA oxidase [EC:1.3.3.6] (A)	ko04146 Peroxisome; ko00592 alpha-Linolenic acid metabolism; ko00071 Fatty acid degradation; ko01212 Fatty acid metabolism; ko01040 Biosynthesis of unsaturated fatty acids;	IQ	Pristanoyl-CoA/acyl-CoA oxidase
F01_cb6767_c16/f2p0/2120	JA	"""PREDICTED: 3-ketoacyl-CoA thiolase 2, peroxisomal OS=Arabidopsis thaliana GN=PED1 PE=1 SV=2"""	0.878	--	0.44532	1.467	--	0.094304	2.182	Up	0.02292	1.306	--	0.088845	GO:0008152 metabolic process;	--	GO:0016746 transferase activity, transferring acyl groups; GO:0016747 transferase activity, transferring acyl groups other than amino-acyl groups; GO:0003824 catalytic activity; GO:0016740 transferase activity;	sly:101255924; 3-ketoacyl-CoA thiolase 2, peroxisomal; K07513 acetyl-CoA acyltransferase 1 [EC:2.3.1.16] (A)	ko00280 Valine, leucine and isoleucine degradation; ko04146 Peroxisome; ko00592 alpha-Linolenic acid metabolism; ko00071 Fatty acid degradation; ko01212 Fatty acid metabolism; ko01040 Biosynthesis of unsaturated fatty acids;	I	3-oxoacyl CoA thiolase
F01_cb4578_c102/f3p0/1806	JA	PREDICTED: Alcohol dehydrogenase 3 OS=Solanum tuberosum GN=ADH3 PE=2 SV=1	0.421	--	0.51374	0.84	--	0.181199	3.549	Up	0.000101981	1.777	--	0.31434	GO:0044699 single-organism process; GO:0008152 metabolic process; GO:0055114 oxidation-reduction process; GO:0044710 single-organism metabolic process;	--	GO:0046914 transition metal ion binding; GO:0003824 catalytic activity; GO:0005488 binding; GO:0043167 ion binding; GO:0046872 metal ion binding; GO:0043169 cation binding; GO:0008270 zinc ion binding; GO:0016491 oxidoreductase activity;	pvu:PHAVU_009G149500g; hypothetical protein; K18857 alcohol dehydrogenase class-P [EC:1.1.1.1] (A)	ko00010 Glycolysis / Gluconeogenesis; ko00592 alpha-Linolenic acid metabolism; ko00071 Fatty acid degradation; ko00350 Tyrosine metabolism;	Q	Alcohol dehydrogenase, class III
F01_cb6807_c5/f1p1/2078	JA	"""PREDICTED: allene oxide synthase, chloroplastic-like [Fragaria vesca subsp. vesca]"""	0.694	--	0.49946	1.036	--	0.66642	2.981	Up	0.000121425	1.996	--	0.141624	GO:0044699 single-organism process; GO:0008152 metabolic process; GO:0055114 oxidation-reduction process; GO:0044710 single-organism metabolic process;	--	GO:0097159 organic cyclic compound binding; GO:1901363 heterocyclic compound binding; GO:0020037 heme binding; GO:0005506 iron ion binding; GO:0046914 transition metal ion binding; GO:0003824 catalytic activity; GO:0005488 binding; GO:0043167 ion binding; GO:0043169 cation binding; GO:0046872 metal ion binding; GO:0016705 oxidoreductase activity, acting on paired donors, with incorporation or red…	cmo:103487935; allene oxide synthase; K01723 hydroperoxide dehydratase [EC:4.2.1.92] (A)	ko00592 alpha-Linolenic acid metabolism;	--	--
F02_cb6096_c12/f1p0/2026	JA	"""PREDICTED: Allene oxide synthase, chloroplastic OS=Linum usitatissimum GN=CYP74A PE=1 SV=1"""	1.049	--	0.79794	0.951	--	0.63842	1.387	--	0.116604	1.53	Up	0.042316	GO:0044699 single-organism process; GO:0008152 metabolic process; GO:0055114 oxidation-reduction process; GO:0044710 single-organism metabolic process;	--	GO:0097159 organic cyclic compound binding; GO:1901363 heterocyclic compound binding; GO:0020037 heme binding; GO:0005506 iron ion binding; GO:0046914 transition metal ion binding; GO:0003824 catalytic activity; GO:0005488 binding; GO:0043167 ion binding; GO:0043169 cation binding; GO:0046872 metal ion binding; GO:0016705 oxidoreductase activity, acting on paired donors, with incorporation or red…	cmo:103487935; allene oxide synthase; K01723 hydroperoxide dehydratase [EC:4.2.1.92] (A)	ko00592 alpha-Linolenic acid metabolism;	--	--
F01_cb5000_c73178/f1p0/1867	Auxin	PREDICTED: Catalase-3 OS=Arabidopsis thaliana GN=CAT3 PE=1 SV=3	0.222	Down	0.0080787	0.546	Down	0.00180037	7.007	Up	0.00028271	2.846	--	0.05082	GO:0008152 metabolic process; GO:0006950 response to stress; GO:0055114 oxidation-reduction process; GO:0044710 single-organism metabolic process; GO:0006979 response to oxidative stress; GO:0044699 single-organism process; GO:0050896 response to stimulus;	--	GO:0097159 organic cyclic compound binding; GO:1901363 heterocyclic compound binding; GO:0020037 heme binding; GO:0003824 catalytic activity; GO:0005488 binding; GO:0016209 antioxidant activity; GO:0004096 catalase activity; GO:0004601 peroxidase activity; GO:0046906 tetrapyrrole binding; GO:0016491 oxidoreductase activity; GO:0016684 oxidoreductase activity, acting on peroxide as acceptor;	ppp:PHYPADRAFT_64727; hypothetical protein; K03781 catalase [EC:1.11.1.6] (A)	ko00380 Tryptophan metabolism; ko04146 Peroxisome; ko00630 Glyoxylate and dicarboxylate metabolism;	P	Catalase
F02_cb2020_c11/f1p2/2033	Auxin	catalase [Pinus sylvestris]	0.489	Down	0.028283	0.549	Down	0.027638	3.025	Up	0.0036827	2.695	Up	0.0080597	GO:0008152 metabolic process; GO:0006950 response to stress; GO:0055114 oxidation-reduction process; GO:0044710 single-organism metabolic process; GO:0006979 response to oxidative stress; GO:0044699 single-organism process; GO:0050896 response to stimulus;	--	GO:0097159 organic cyclic compound binding; GO:1901363 heterocyclic compound binding; GO:0020037 heme binding; GO:0003824 catalytic activity; GO:0005488 binding; GO:0016209 antioxidant activity; GO:0004096 catalase activity; GO:0004601 peroxidase activity; GO:0046906 tetrapyrrole binding; GO:0016491 oxidoreductase activity; GO:0016684 oxidoreductase activity, acting on peroxide as acceptor;	ppp:PHYPADRAFT_64727; hypothetical protein; K03781 catalase [EC:1.11.1.6] (A)	ko00380 Tryptophan metabolism; ko04146 Peroxisome; ko00630 Glyoxylate and dicarboxylate metabolism;	P	Catalase
F01_cb5000_c59491/f1p0/1756	Auxin	PREDICTED: Catalase-3 OS=Arabidopsis thaliana GN=CAT3 PE=1 SV=3	--	--	--	0.574	Down	0.0197785	--	--	--	--	--	--	GO:0008152 metabolic process; GO:0006950 response to stress; GO:0055114 oxidation-reduction process; GO:0044710 single-organism metabolic process; GO:0006979 response to oxidative stress; GO:0044699 single-organism process; GO:0050896 response to stimulus;	--	GO:0097159 organic cyclic compound binding; GO:1901363 heterocyclic compound binding; GO:0020037 heme binding; GO:0003824 catalytic activity; GO:0005488 binding; GO:0016209 antioxidant activity; GO:0004096 catalase activity; GO:0004601 peroxidase activity; GO:0046906 tetrapyrrole binding; GO:0016491 oxidoreductase activity; GO:0016684 oxidoreductase activity, acting on peroxide as acceptor;	ppp:PHYPADRAFT_64727; hypothetical protein; K03781 catalase [EC:1.11.1.6] (A)	ko00380 Tryptophan metabolism; ko04146 Peroxisome; ko00630 Glyoxylate and dicarboxylate metabolism;	P	Catalase
F01_cb833_c11/f1p0/1615	Auxin	PREDICTED: probable indole-3-pyruvate monooxygenase YUCCA10 [Musa acuminata subsp. malaccensis]	--	--	--	1.298	Up	0.035381	--	--	--	--	--	--	GO:0044699 single-organism process; GO:0008152 metabolic process; GO:0055114 oxidation-reduction process; GO:0044710 single-organism metabolic process;	--	GO:0016709 oxidoreductase activity, acting on paired donors, with incorporation or reduction of molecular oxygen, NAD(P)H as one donor, and incorporation of one atom of oxygen; GO:1901265 nucleoside phosphate binding; GO:0050660 flavin adenine dinucleotide binding; GO:0043167 ion binding; GO:0016705 oxidoreductase activity, acting on paired donors, with incorporation or reduction of molecular oxy…	mus:103977872; probable indole-3-pyruvate monooxygenase YUCCA10; K11816 indole-3-pyruvate monooxygenase [EC:1.14.13.168] (A)	ko00380 Tryptophan metabolism;	Q	Flavin-containing monooxygenase
F01_cb5000_c161251/f1p3/2081	Auxin	"""PREDICTED: Aldehyde dehydrogenase family 2 member B7, mitochondrial OS=Arabidopsis thaliana GN=ALDH2B7 PE=2 SV=2"""	--	--	--	3.403	Up	0.00138055	--	--	--	--	--	--	GO:0044699 single-organism process; GO:0008152 metabolic process; GO:0055114 oxidation-reduction process; GO:0044710 single-organism metabolic process;	--	GO:0016620 oxidoreductase activity, acting on the aldehyde or oxo group of donors, NAD or NADP as acceptor; GO:0003824 catalytic activity; GO:0016491 oxidoreductase activity; GO:0016903 oxidoreductase activity, acting on the aldehyde or oxo group of donors;	gmx:100816594; aldehyde dehydrogenase family 3 member H1-like; K00128 aldehyde dehydrogenase (NAD+) [EC:1.2.1.3] (A)	ko00310 Lysine degradation; ko00071 Fatty acid degradation; ko00561 Glycerolipid metabolism; ko00040 Pentose and glucuronate interconversions; ko00053 Ascorbate and aldarate metabolism; ko00903 Limonene and pinene degradation; ko00380 Tryptophan metabolism; ko00280 Valine, leucine and isoleucine degradation; ko00010 Glycolysis / Gluconeogenesis; ko00330 Arginine and proline metabolism; ko00410 be…	C	Aldehyde dehydrogenase
F01_cb5000_c58066/f3p3/2219	Auxin	"""PREDICTED: Aldehyde dehydrogenase family 2 member B7, mitochondrial OS=Arabidopsis thaliana GN=ALDH2B7 PE=2 SV=2"""	0.479	--	0.30006	0.18	Down	0.00129598	1.087	--	0.82994	2.895	--	0.054845	GO:0044699 single-organism process; GO:0008152 metabolic process; GO:0055114 oxidation-reduction process; GO:0044710 single-organism metabolic process;	--	GO:0016620 oxidoreductase activity, acting on the aldehyde or oxo group of donors, NAD or NADP as acceptor; GO:0003824 catalytic activity; GO:0016491 oxidoreductase activity; GO:0016903 oxidoreductase activity, acting on the aldehyde or oxo group of donors;	gmx:100816594; aldehyde dehydrogenase family 3 member H1-like; K00128 aldehyde dehydrogenase (NAD+) [EC:1.2.1.3] (A)	ko00310 Lysine degradation; ko00071 Fatty acid degradation; ko00561 Glycerolipid metabolism; ko00040 Pentose and glucuronate interconversions; ko00053 Ascorbate and aldarate metabolism; ko00903 Limonene and pinene degradation; ko00380 Tryptophan metabolism; ko00280 Valine, leucine and isoleucine degradation; ko00010 Glycolysis / Gluconeogenesis; ko00330 Arginine and proline metabolism; ko00410 be…	C	Aldehyde dehydrogenase
F01_cb5000_c104800/f2p0/2233	Auxin	"""PREDICTED: Aldehyde dehydrogenase family 2 member B7, mitochondrial OS=Arabidopsis thaliana GN=ALDH2B7 PE=2 SV=2"""	--	--	--	1.645	Up	0.0182214	--	--	--	--	--	--	GO:0044699 single-organism process; GO:0008152 metabolic process; GO:0055114 oxidation-reduction process; GO:0044710 single-organism metabolic process;	--	GO:0016620 oxidoreductase activity, acting on the aldehyde or oxo group of donors, NAD or NADP as acceptor; GO:0003824 catalytic activity; GO:0016491 oxidoreductase activity; GO:0016903 oxidoreductase activity, acting on the aldehyde or oxo group of donors;	gmx:100816594; aldehyde dehydrogenase family 3 member H1-like; K00128 aldehyde dehydrogenase (NAD+) [EC:1.2.1.3] (A)	ko00310 Lysine degradation; ko00071 Fatty acid degradation; ko00561 Glycerolipid metabolism; ko00040 Pentose and glucuronate interconversions; ko00053 Ascorbate and aldarate metabolism; ko00903 Limonene and pinene degradation; ko00380 Tryptophan metabolism; ko00280 Valine, leucine and isoleucine degradation; ko00010 Glycolysis / Gluconeogenesis; ko00330 Arginine and proline metabolism; ko00410 be…	C	Aldehyde dehydrogenase
F02_cb4385_c7147/f1p3/1067	Auxin	PREDICTED: Catalase-1/2 OS=Glycine max GN=CAT1 PE=2 SV=1	0.577	--	0.20696	0.568	Down	0.0060368	2.578	Up	0.0037573	2.618	--	0.073299	GO:0008152 metabolic process; GO:0006950 response to stress; GO:0055114 oxidation-reduction process; GO:0044710 single-organism metabolic process; GO:0006979 response to oxidative stress; GO:0044699 single-organism process; GO:0050896 response to stimulus;	--	GO:0097159 organic cyclic compound binding; GO:1901363 heterocyclic compound binding; GO:0020037 heme binding; GO:0003824 catalytic activity; GO:0005488 binding; GO:0016209 antioxidant activity; GO:0004096 catalase activity; GO:0004601 peroxidase activity; GO:0046906 tetrapyrrole binding; GO:0016491 oxidoreductase activity; GO:0016684 oxidoreductase activity, acting on peroxide as acceptor;	ppp:PHYPADRAFT_64727; hypothetical protein; K03781 catalase [EC:1.11.1.6] (A)	ko00380 Tryptophan metabolism; ko04146 Peroxisome; ko00630 Glyoxylate and dicarboxylate metabolism;	P	Catalase
F02_cb4385_c7306/f1p0/1731	Auxin	PREDICTED: Catalase-3 OS=Arabidopsis thaliana GN=CAT3 PE=1 SV=3	--	--	--	0.665	Down	0.030498	--	--	--	--	--	--	GO:0008152 metabolic process; GO:0006950 response to stress; GO:0055114 oxidation-reduction process; GO:0044710 single-organism metabolic process; GO:0006979 response to oxidative stress; GO:0044699 single-organism process; GO:0050896 response to stimulus;	--	GO:0097159 organic cyclic compound binding; GO:1901363 heterocyclic compound binding; GO:0020037 heme binding; GO:0003824 catalytic activity; GO:0005488 binding; GO:0016209 antioxidant activity; GO:0004096 catalase activity; GO:0004601 peroxidase activity; GO:0046906 tetrapyrrole binding; GO:0016491 oxidoreductase activity; GO:0016684 oxidoreductase activity, acting on peroxide as acceptor;	ppp:PHYPADRAFT_64727; hypothetical protein; K03781 catalase [EC:1.11.1.6] (A)	ko00380 Tryptophan metabolism; ko04146 Peroxisome; ko00630 Glyoxylate and dicarboxylate metabolism;	P	Catalase
F01_cb5693_c32/f1p0/1662	Auxin	"""PREDICTED: Probable acetyl-CoA acetyltransferase, cytosolic 2 OS=Arabidopsis thaliana GN=At5g47720 PE=2 SV=1"""	0.231	--	0.20462	0.721	--	0.120721	7.565	Up	0.005783	2.43	--	0.187603	GO:0008152 metabolic process;	--	GO:0016746 transferase activity, transferring acyl groups; GO:0016747 transferase activity, transferring acyl groups other than amino-acyl groups; GO:0003824 catalytic activity; GO:0016740 transferase activity;	rcu:RCOM_0690990; acetyl-CoA acetyltransferase, mitochondrial, putative (EC:2.3.1.9); K00626 acetyl-CoA C-acetyltransferase [EC:2.3.1.9] (A)	ko00310 Lysine degradation; ko00071 Fatty acid degradation; ko00900 Terpenoid backbone biosynthesis; ko00380 Tryptophan metabolism; ko00280 Valine, leucine and isoleucine degradation; ko00072 Synthesis and degradation of ketone bodies; ko01200 Carbon metabolism; ko01212 Fatty acid metabolism; ko00620 Pyruvate metabolism; ko00650 Butanoate metabolism; ko00630 Glyoxylate and dicarboxylate metabolis…	I	Acetyl-CoA acetyltransferase
F01_cb5877_c4/f1p0/2453	Auxin	PREDICTED: Aldehyde dehydrogenase family 7 member B4 OS=Arabidopsis thaliana GN=ALDH7B4 PE=2 SV=3	0.335	--	0.129943	1.176	--	0.182877	6.859	Up	0.00016266	1.952	--	0.151942	GO:0044699 single-organism process; GO:0008152 metabolic process; GO:0055114 oxidation-reduction process; GO:0044710 single-organism metabolic process;	--	GO:0016620 oxidoreductase activity, acting on the aldehyde or oxo group of donors, NAD or NADP as acceptor; GO:0003824 catalytic activity; GO:0016491 oxidoreductase activity; GO:0016903 oxidoreductase activity, acting on the aldehyde or oxo group of donors;	atr:s00024p00245650; AMTR_s00024p00245650; hypothetical protein; K14085 aldehyde dehydrogenase family 7 member A1 [EC:1.2.1.31 1.2.1.8 1.2.1.3] (A)	ko00310 Lysine degradation; ko00071 Fatty acid degradation; ko00561 Glycerolipid metabolism; ko01230 Biosynthesis of amino acids; ko00260 Glycine, serine and threonine metabolism; ko00053 Ascorbate and aldarate metabolism; ko00380 Tryptophan metabolism; ko00280 Valine, leucine and isoleucine degradation; ko00010 Glycolysis / Gluconeogenesis; ko00330 Arginine and proline metabolism; ko00410 beta-A…	C	Aldehyde dehydrogenase
F02_cb513_c18/f1p0/3819	Auxin	hypothetical protein AMTR_s00168p00055310 [Amborella trichopoda]	0.692	--	0.42044	1.02	--	0.85032	2.562	Up	0.0021606	1.74	--	0.175757	GO:0072350 tricarboxylic acid metabolic process; GO:0055114 oxidation-reduction process; GO:0044281 small molecule metabolic process; GO:0044763 single-organism cellular process; GO:0006099 tricarboxylic acid cycle; GO:0044699 single-organism process; GO:0044238 primary metabolic process; GO:0045333 cellular respiration; GO:0044237 cellular metabolic process; GO:0071704 organic substance metaboli…	--	GO:0019842 vitamin binding; GO:0043167 ion binding; GO:0016903 oxidoreductase activity, acting on the aldehyde or oxo group of donors; GO:0048037 cofactor binding; GO:1901681 sulfur compound binding; GO:0030976 thiamine pyrophosphate binding; GO:0016491 oxidoreductase activity; GO:1901363 heterocyclic compound binding; GO:0097159 organic cyclic compound binding; GO:0003824 catalytic activity; GO:…	atr:s00168p00055310; AMTR_s00168p00055310; hypothetical protein; K00164 2-oxoglutarate dehydrogenase E1 component [EC:1.2.4.2] (A)	ko00020 Citrate cycle (TCA cycle); ko00310 Lysine degradation; ko00380 Tryptophan metabolism; ko01200 Carbon metabolism;	G	2-oxoglutarate dehydrogenase, E1 subunit
F02_cb7181_c7/f1p0/2035	CTK	PREDICTED: Zeatin O-xylosyltransferase OS=Phaseolus vulgaris GN=ZOX1 PE=2 SV=1	5.894	Up	0.00015985	--	--	--	--	--	--	--	--	--	GO:0008152 metabolic process;	--	GO:0016757 transferase activity, transferring glycosyl groups; GO:0016758 transferase activity, transferring hexosyl groups; GO:0003824 catalytic activity; GO:0016740 transferase activity;	vvi:100262460; zeatin O-glucosyltransferase-like; K13495 cis-zeatin O-glucosyltransferase [EC:2.4.1.215] (A)	ko00908 Zeatin biosynthesis;	GC	UDP-glucuronosyl and UDP-glucosyl transferase
F01_cb8001_c19/f5p1/1837	CTK	PREDICTED: UDP-glycosyltransferase 73B4 OS=Arabidopsis thaliana GN=UGT73B4 PE=2 SV=1	0.289	Down	0.0196039	0.42	Down	0.00066254	2.108	Up	0.0135984	1.45	--	0.18742	GO:0008152 metabolic process;	--	GO:0016757 transferase activity, transferring glycosyl groups; GO:0016758 transferase activity, transferring hexosyl groups; GO:0003824 catalytic activity; GO:0016740 transferase activity;	vvi:100262460; zeatin O-glucosyltransferase-like; K13495 cis-zeatin O-glucosyltransferase [EC:2.4.1.215] (A)	ko00908 Zeatin biosynthesis;	GC	UDP-glucuronosyl and UDP-glucosyl transferase
F02_cb7995_c2/f1p0/1957	CTK	PREDICTED: Zeatin O-glucosyltransferase OS=Phaseolus lunatus GN=ZOG1 PE=2 SV=1	--	--	--	2.011	Up	0.0027967	--	--	--	--	--	--	GO:0008152 metabolic process;	--	GO:0016757 transferase activity, transferring glycosyl groups; GO:0016758 transferase activity, transferring hexosyl groups; GO:0003824 catalytic activity; GO:0016740 transferase activity;	vvi:100262460; zeatin O-glucosyltransferase-like; K13495 cis-zeatin O-glucosyltransferase [EC:2.4.1.215] (A)	ko00908 Zeatin biosynthesis;	GC	UDP-glucuronosyl and UDP-glucosyl transferase
F02_cb7181_c4/f2p0/1825	CTK	PREDICTED: Zeatin O-xylosyltransferase OS=Phaseolus vulgaris GN=ZOX1 PE=2 SV=1	--	--	--	4.409	Up	6.37e-05	--	--	--	--	--	--	GO:0008152 metabolic process;	--	GO:0016757 transferase activity, transferring glycosyl groups; GO:0016758 transferase activity, transferring hexosyl groups; GO:0003824 catalytic activity; GO:0016740 transferase activity;	vvi:100262460; zeatin O-glucosyltransferase-like; K13495 cis-zeatin O-glucosyltransferase [EC:2.4.1.215] (A)	ko00908 Zeatin biosynthesis;	GC	UDP-glucuronosyl and UDP-glucosyl transferase
F02_cb6400_c6/f1p0/1699	CTK	PREDICTED: tRNA dimethylallyltransferase 9 isoform X1 [Nelumbo nucifera]	--	--	--	1.532	Up	0.020158	--	--	--	--	--	--	GO:0006396 RNA processing; GO:0034470 ncRNA processing; GO:0006725 cellular aromatic compound metabolic process; GO:1901360 organic cyclic compound metabolic process; GO:0006807 nitrogen compound metabolic process; GO:0044238 primary metabolic process; GO:0044237 cellular metabolic process; GO:0071704 organic substance metabolic process; GO:0016070 RNA metabolic process; GO:0008152 metabolic proc…	--	--	vvi:100245121; tRNA dimethylallyltransferase 9; K00791 tRNA dimethylallyltransferase [EC:2.5.1.75] (A)	ko00908 Zeatin biosynthesis;	J	tRNA delta(2)-isopentenylpyrophosphate transferase
F02_cb13087_c3/f1p0/1547	Ethylene	PREDICTED: L-lactate dehydrogenase B (Fragment) OS=Hordeum vulgare PE=1 SV=1	3.679	Up	0.0035184	4.97	Up	0.0022358	0.498	Down	0.036021	0.369	Down	0.0092037	GO:0008152 metabolic process; GO:0055114 oxidation-reduction process; GO:0044710 single-organism metabolic process; GO:0044281 small molecule metabolic process; GO:0044763 single-organism cellular process; GO:0019752 carboxylic acid metabolic process; GO:0044699 single-organism process; GO:0005975 carbohydrate metabolic process; GO:0044238 primary metabolic process; GO:0006082 organic acid metabo…	GO:0044424 intracellular part; GO:0005623 cell; GO:0044464 cell part; GO:0005622 intracellular; GO:0005737 cytoplasm;	GO:0016614 oxidoreductase activity, acting on CH-OH group of donors; GO:0004457 lactate dehydrogenase activity; GO:0016616 oxidoreductase activity, acting on the CH-OH group of donors, NAD or NADP as acceptor; GO:0004459 L-lactate dehydrogenase activity; GO:0003824 catalytic activity; GO:0016491 oxidoreductase activity;	vvi:100250615; L-lactate dehydrogenase A; K00016 L-lactate dehydrogenase [EC:1.1.1.27] (A)	ko00270 Cysteine and methionine metabolism; ko00010 Glycolysis / Gluconeogenesis; ko00620 Pyruvate metabolism; ko00640 Propanoate metabolism;	C	Lactate dehydrogenase
F02_cb6090_c29/f1p0/1519	Ethylene	PREDICTED: Homocysteine S-methyltransferase 2 OS=Arabidopsis thaliana GN=HMT-2 PE=1 SV=1	2.595	Up	0.022784	15.534	Up	0.0020151	6.997	Up	0.00119695	1.169	--	0.58698	--	--	--	rcu:RCOM_0646290; 5-methyltetrahydrofolate:homocysteine methyltransferase, putative (EC:2.1.1.10); K00547 homocysteine S-methyltransferase [EC:2.1.1.10] (A)	ko00270 Cysteine and methionine metabolism;	E	Homocysteine S-methyltransferase
F02_cb14399_c7/f2p0/1567	Ethylene	"""PREDICTED: L-3-cyanoalanine synthase 1, mitochondrial OS=Malus domestica GN=CAS1 PE=1 SV=1"""	2.718	Up	0.0011376	3.086	Up	0.0112615	1.546	--	0.146484	1.362	--	0.144457	GO:0000097 sulfur amino acid biosynthetic process; GO:0016053 organic acid biosynthetic process; GO:0044699 single-organism process; GO:0009058 biosynthetic process; GO:1901566 organonitrogen compound biosynthetic process; GO:0044237 cellular metabolic process; GO:0044272 sulfur compound biosynthetic process; GO:0000096 sulfur amino acid metabolic process; GO:0071704 organic substance metabolic p…	--	GO:0016829 lyase activity; GO:0004124 cysteine synthase activity; GO:0003824 catalytic activity; GO:0016835 carbon-oxygen lyase activity;	atr:s00009p00219590; AMTR_s00009p00219590; hypothetical protein; K13034 L-3-cyanoalanine synthase/ cysteine synthase [EC:2.5.1.47 4.4.1.9] (A)	ko00270 Cysteine and methionine metabolism; ko01200 Carbon metabolism; ko01230 Biosynthesis of amino acids; ko00920 Sulfur metabolism; ko00460 Cyanoamino acid metabolism;	E	Cystathionine beta-synthase and related enzymes
F01_cb9707_c7/f1p0/1203	Ethylene	PREDICTED: Serine acetyltransferase 5 OS=Arabidopsis thaliana GN=SAT5 PE=1 SV=1	1.964	Up	0.0024964	1.532	--	0.053536	0.65	Down	0.022123	0.833	--	0.30852	GO:0000097 sulfur amino acid biosynthetic process; GO:0016053 organic acid biosynthetic process; GO:0044699 single-organism process; GO:0009058 biosynthetic process; GO:1901566 organonitrogen compound biosynthetic process; GO:0044237 cellular metabolic process; GO:0044272 sulfur compound biosynthetic process; GO:0000096 sulfur amino acid metabolic process; GO:0071704 organic substance metabolic p…	GO:0044424 intracellular part; GO:0005623 cell; GO:0044464 cell part; GO:0005622 intracellular; GO:0005737 cytoplasm;	GO:0016746 transferase activity, transferring acyl groups; GO:0009001 serine O-acetyltransferase activity; GO:0003824 catalytic activity; GO:0016412 serine O-acyltransferase activity; GO:0016413 O-acetyltransferase activity; GO:0016740 transferase activity; GO:0016747 transferase activity, transferring acyl groups other than amino-acyl groups; GO:0016407 acetyltransferase activity; GO:0008374 O-a…	smo:SELMODRAFT_132502; hypothetical protein; K00640 serine O-acetyltransferase [EC:2.3.1.30] (A)	ko00270 Cysteine and methionine metabolism; ko01200 Carbon metabolism; ko01230 Biosynthesis of amino acids; ko00920 Sulfur metabolism;	E	Serine O-acetyltransferase
F02_cb9735_c47592/f2p5/2884	Ethylene	PREDICTED: 5-methyltetrahydropteroyltriglutamateNAhomocysteine methyltransferase 2 OS=Oryza sativa subsp. japonica GN=Os12g0624000 PE=2 SV=1	9.315	Up	0.0026159	12.41	Up	0.0024039	1.988	Up	0.0178969	1.492	--	0.38484	GO:0000097 sulfur amino acid biosynthetic process; GO:0016053 organic acid biosynthetic process; GO:0009066 aspartate family amino acid metabolic process; GO:0044699 single-organism process; GO:0009058 biosynthetic process; GO:1901566 organonitrogen compound biosynthetic process; GO:0044237 cellular metabolic process; GO:0000096 sulfur amino acid metabolic process; GO:0044272 sulfur compound bios…	--	GO:0042085 5-methyltetrahydropteroyltri-L-glutamate-dependent methyltransferase activity; GO:0008168 methyltransferase activity; GO:0046914 transition metal ion binding; GO:0003824 catalytic activity; GO:0005488 binding; GO:0008172 S-methyltransferase activity; GO:0043167 ion binding; GO:0016741 transferase activity, transferring one-carbon groups; GO:0046872 metal ion binding; GO:0043169 cation …	pda:103698689; 5-methyltetrahydropteroyltriglutamateNAhomocysteine methyltransferase 1; K00549 5-methyltetrahydropteroyltriglutamateNAhomocysteine methyltransferase [EC:2.1.1.14] (A)	ko00270 Cysteine and methionine metabolism; ko01230 Biosynthesis of amino acids; ko00450 Selenocompound metabolism;	E	Methionine synthase II (cobalamin-independent)
F01_cb13374_c0/f8p1/1053	Ethylene	PREDICTED: 5'-methylthioadenosine/S-adenosylhomocysteine nucleosidase 1 OS=Arabidopsis thaliana GN=MTN1 PE=1 SV=1	1.356	Up	0.021517	1.521	--	0.079063	0.584	--	0.053	0.521	Down	0.0105562	GO:0009116 nucleoside metabolic process; GO:0006725 cellular aromatic compound metabolic process; GO:0044281 small molecule metabolic process; GO:0044763 single-organism cellular process; GO:0044699 single-organism process; GO:1901360 organic cyclic compound metabolic process; GO:0006807 nitrogen compound metabolic process; GO:0044238 primary metabolic process; GO:0044237 cellular metabolic proce…	--	GO:0003824 catalytic activity;	fve:101300865; 5'-methylthioadenosine/S-adenosylhomocysteine nucleosidase 1-like; K01244 5'-methylthioadenosine nucleosidase [EC:3.2.2.16] (A)	ko00270 Cysteine and methionine metabolism;	--	--
F02_cb7262_c5/f1p0/1923	Ethylene	"""PREDICTED: cystathionine beta-lyase, chloroplastic isoform X1 [Sesamum indicum]"""	0.719	--	0.147861	0.826	Down	0.0057992	1.381	Up	0.021464	1.202	--	0.31458	GO:0000097 sulfur amino acid biosynthetic process; GO:0016053 organic acid biosynthetic process; GO:0009066 aspartate family amino acid metabolic process; GO:0044699 single-organism process; GO:0009058 biosynthetic process; GO:1901566 organonitrogen compound biosynthetic process; GO:0044237 cellular metabolic process; GO:0044272 sulfur compound biosynthetic process; GO:0000096 sulfur amino acid m…	--	GO:0097159 organic cyclic compound binding; GO:1901363 heterocyclic compound binding; GO:0004121 cystathionine beta-lyase activity; GO:0003824 catalytic activity; GO:0005488 binding; GO:0043167 ion binding; GO:0016829 lyase activity; GO:0043168 anion binding; GO:0016846 carbon-sulfur lyase activity; GO:0048037 cofactor binding; GO:0030170 pyridoxal phosphate binding;	rcu:RCOM_1444740; cystathionine beta-lyase, putative (EC:4.4.1.1); K01760 cystathionine beta-lyase [EC:4.4.1.8] (A)	ko00270 Cysteine and methionine metabolism; ko01230 Biosynthesis of amino acids; ko00450 Selenocompound metabolism;	E	Cystathionine beta-lyases/cystathionine gamma-synthases
F01_cb11399_c0/f2p0/1548	Ethylene	PREDICTED: L-lactate dehydrogenase B (Fragment) OS=Hordeum vulgare PE=1 SV=1	0.848	--	0.194378	0.503	Down	0.0039555	0.51	Down	0.0038612	0.861	--	0.24194	GO:0008152 metabolic process; GO:0055114 oxidation-reduction process; GO:0044710 single-organism metabolic process; GO:0044281 small molecule metabolic process; GO:0044763 single-organism cellular process; GO:0019752 carboxylic acid metabolic process; GO:0044699 single-organism process; GO:0005975 carbohydrate metabolic process; GO:0044238 primary metabolic process; GO:0006082 organic acid metabo…	GO:0044424 intracellular part; GO:0005623 cell; GO:0044464 cell part; GO:0005622 intracellular; GO:0005737 cytoplasm;	GO:0016614 oxidoreductase activity, acting on CH-OH group of donors; GO:0004457 lactate dehydrogenase activity; GO:0016616 oxidoreductase activity, acting on the CH-OH group of donors, NAD or NADP as acceptor; GO:0004459 L-lactate dehydrogenase activity; GO:0003824 catalytic activity; GO:0016491 oxidoreductase activity;	vvi:100250615; L-lactate dehydrogenase A; K00016 L-lactate dehydrogenase [EC:1.1.1.27] (A)	ko00270 Cysteine and methionine metabolism; ko00010 Glycolysis / Gluconeogenesis; ko00620 Pyruvate metabolism; ko00640 Propanoate metabolism;	C	Lactate dehydrogenase
F01_cb5413_c25/f36p2/1735	Ethylene	"""PREDICTED: Aspartate aminotransferase 3, chloroplastic OS=Arabidopsis thaliana GN=ASP3 PE=1 SV=1"""	0.649	--	0.087018	0.539	Down	0.0143409	1.068	--	0.77524	1.286	--	0.115416	GO:0044281 small molecule metabolic process; GO:0044763 single-organism cellular process; GO:0006807 nitrogen compound metabolic process; GO:0044699 single-organism process; GO:0009058 biosynthetic process; GO:0044238 primary metabolic process; GO:0044237 cellular metabolic process; GO:0071704 organic substance metabolic process; GO:0008152 metabolic process; GO:0006520 cellular amino acid metabo…	--	GO:0097159 organic cyclic compound binding; GO:1901363 heterocyclic compound binding; GO:0016769 transferase activity, transferring nitrogenous groups; GO:0003824 catalytic activity; GO:0005488 binding; GO:0043167 ion binding; GO:0043168 anion binding; GO:0008483 transaminase activity; GO:0016740 transferase activity; GO:0048037 cofactor binding; GO:0030170 pyridoxal phosphate binding;	tcc:TCM_037152; Aspartate aminotransferase 3; K14454 aspartate aminotransferase, cytoplasmic [EC:2.6.1.1] (A)	ko00270 Cysteine and methionine metabolism; ko00710 Carbon fixation in photosynthetic organisms; ko01230 Biosynthesis of amino acids; ko00350 Tyrosine metabolism; ko00360 Phenylalanine metabolism; ko00950 Isoquinoline alkaloid biosynthesis; ko01210 2-Oxocarboxylic acid metabolism; ko00250 Alanine, aspartate and glutamate metabolism; ko00330 Arginine and proline metabolism; ko01200 Carbon metaboli…	E	Aspartate aminotransferase/Glutamic oxaloacetic transaminase AAT1/GOT2
F02_cb14579_c25/f1p2/2183	Ethylene	"""PREDICTED: Aspartate aminotransferase, chloroplastic OS=Arabidopsis thaliana GN=ASP5 PE=1 SV=2"""	1.083	--	0.62452	1.57	Up	0.020102	1.787	Up	0.0105629	1.233	--	0.26802	GO:0044281 small molecule metabolic process; GO:0044763 single-organism cellular process; GO:0006807 nitrogen compound metabolic process; GO:0044699 single-organism process; GO:0009058 biosynthetic process; GO:0044238 primary metabolic process; GO:0044237 cellular metabolic process; GO:0071704 organic substance metabolic process; GO:0008152 metabolic process; GO:0006520 cellular amino acid metabo…	--	GO:0097159 organic cyclic compound binding; GO:1901363 heterocyclic compound binding; GO:0016769 transferase activity, transferring nitrogenous groups; GO:0003824 catalytic activity; GO:0005488 binding; GO:0043167 ion binding; GO:0043168 anion binding; GO:0008483 transaminase activity; GO:0016740 transferase activity; GO:0048037 cofactor binding; GO:0030170 pyridoxal phosphate binding;	atr:s00026p00065580; AMTR_s00026p00065580; hypothetical protein; K00811 aspartate aminotransferase, chloroplastic [EC:2.6.1.1] (A)	ko00270 Cysteine and methionine metabolism; ko01230 Biosynthesis of amino acids; ko00350 Tyrosine metabolism; ko00360 Phenylalanine metabolism; ko00950 Isoquinoline alkaloid biosynthesis; ko01210 2-Oxocarboxylic acid metabolism; ko00250 Alanine, aspartate and glutamate metabolism; ko00330 Arginine and proline metabolism; ko00400 Phenylalanine, tyrosine and tryptophan biosynthesis; ko00960 Tropane…	E	Aspartate aminotransferase/Glutamic oxaloacetic transaminase AAT1/GOT2
F01_cb7166_c29/f1p0/1891	Ethylene	S-adenosyl-L-homocysteine hydrolase [Pinus pinaster]	0.42	--	0.169602	0.43	Down	0.00046485	2.587	Up	0.00083591	2.526	--	0.12764	GO:1901606 alpha-amino acid catabolic process; GO:0009116 nucleoside metabolic process; GO:0042278 purine nucleoside metabolic process; GO:0046498 S-adenosylhomocysteine metabolic process; GO:0006725 cellular aromatic compound metabolic process; GO:0044699 single-organism process; GO:0072523 purine-containing compound catabolic process; GO:0044237 cellular metabolic process; GO:0071704 organic su…	--	GO:0097159 organic cyclic compound binding; GO:1901363 heterocyclic compound binding; GO:0004013 adenosylhomocysteinase activity; GO:0016801 hydrolase activity, acting on ether bonds; GO:1901265 nucleoside phosphate binding; GO:0051287 NAD binding; GO:0003824 catalytic activity; GO:0005488 binding; GO:0016787 hydrolase activity; GO:0000166 nucleotide binding; GO:0048037 cofactor binding; GO:00168…	pda:103717175; adenosylhomocysteinase; K01251 adenosylhomocysteinase [EC:3.3.1.1] (A)	ko00270 Cysteine and methionine metabolism;	H	S-adenosylhomocysteine hydrolase
F01_cb5000_c3268/f4p0/2933	Ethylene	PREDICTED: 5-methyltetrahydropteroyltriglutamateNAhomocysteine methyltransferase 2 OS=Oryza sativa subsp. japonica GN=Os12g0624000 PE=2 SV=1	0.589	--	0.186943	0.657	Down	0.0156579	1.327	--	0.08526	1.189	--	0.47702	GO:0000097 sulfur amino acid biosynthetic process; GO:0016053 organic acid biosynthetic process; GO:0009066 aspartate family amino acid metabolic process; GO:0044699 single-organism process; GO:0009058 biosynthetic process; GO:1901566 organonitrogen compound biosynthetic process; GO:0044237 cellular metabolic process; GO:0000096 sulfur amino acid metabolic process; GO:0044272 sulfur compound bios…	--	GO:0042085 5-methyltetrahydropteroyltri-L-glutamate-dependent methyltransferase activity; GO:0008168 methyltransferase activity; GO:0046914 transition metal ion binding; GO:0003824 catalytic activity; GO:0005488 binding; GO:0008172 S-methyltransferase activity; GO:0043167 ion binding; GO:0016741 transferase activity, transferring one-carbon groups; GO:0046872 metal ion binding; GO:0043169 cation …	pda:103698689; 5-methyltetrahydropteroyltriglutamateNAhomocysteine methyltransferase 1; K00549 5-methyltetrahydropteroyltriglutamateNAhomocysteine methyltransferase [EC:2.1.1.14] (A)	ko00270 Cysteine and methionine metabolism; ko01230 Biosynthesis of amino acids; ko00450 Selenocompound metabolism;	E	Methionine synthase II (cobalamin-independent)
F02_cb6090_c16/f1p0/1788	Ethylene	PREDICTED: Homocysteine S-methyltransferase 2 OS=Arabidopsis thaliana GN=HMT-2 PE=1 SV=1	1.693	--	0.061321	3.72	Up	0.00184307	2.793	Up	0.0040242	1.271	--	0.27816	--	--	--	rcu:RCOM_0646290; 5-methyltetrahydrofolate:homocysteine methyltransferase, putative (EC:2.1.1.10); K00547 homocysteine S-methyltransferase [EC:2.1.1.10] (A)	ko00270 Cysteine and methionine metabolism;	E	Homocysteine S-methyltransferase
F02_cb9735_c58110/f4p3/2149	Ethylene	S-adenosyl-L-homocysteine hydrolase [Pinus pinaster]	--	--	--	15.959	Up	0.0075956	--	--	--	--	--	--	GO:1901606 alpha-amino acid catabolic process; GO:0009116 nucleoside metabolic process; GO:0042278 purine nucleoside metabolic process; GO:0046498 S-adenosylhomocysteine metabolic process; GO:0006725 cellular aromatic compound metabolic process; GO:0044699 single-organism process; GO:0072523 purine-containing compound catabolic process; GO:0044237 cellular metabolic process; GO:0071704 organic su…	--	GO:0097159 organic cyclic compound binding; GO:1901363 heterocyclic compound binding; GO:0004013 adenosylhomocysteinase activity; GO:0016801 hydrolase activity, acting on ether bonds; GO:1901265 nucleoside phosphate binding; GO:0051287 NAD binding; GO:0003824 catalytic activity; GO:0005488 binding; GO:0016787 hydrolase activity; GO:0000166 nucleotide binding; GO:0048037 cofactor binding; GO:00168…	pda:103717175; adenosylhomocysteinase; K01251 adenosylhomocysteinase [EC:3.3.1.1] (A)	ko00270 Cysteine and methionine metabolism;	H	S-adenosylhomocysteine hydrolase
F02_cb5704_c10/f1p0/1809	Ethylene	PREDICTED: Probable aminotransferase TAT2 OS=Arabidopsis thaliana GN=At5g53970 PE=2 SV=1	--	--	--	2.046	Up	0.0047558	--	--	--	--	--	--	GO:0044281 small molecule metabolic process; GO:0044763 single-organism cellular process; GO:0006807 nitrogen compound metabolic process; GO:0044699 single-organism process; GO:0009058 biosynthetic process; GO:0044238 primary metabolic process; GO:0044237 cellular metabolic process; GO:0071704 organic substance metabolic process; GO:0008152 metabolic process; GO:0006520 cellular amino acid metabo…	--	GO:0097159 organic cyclic compound binding; GO:1901363 heterocyclic compound binding; GO:0016769 transferase activity, transferring nitrogenous groups; GO:0003824 catalytic activity; GO:0005488 binding; GO:0043167 ion binding; GO:0043168 anion binding; GO:0008483 transaminase activity; GO:0016740 transferase activity; GO:0048037 cofactor binding; GO:0030170 pyridoxal phosphate binding;	mus:103999327; nicotianamine aminotransferase A-like; K00815 tyrosine aminotransferase [EC:2.6.1.5] (A)	ko00270 Cysteine and methionine metabolism; ko01230 Biosynthesis of amino acids; ko00350 Tyrosine metabolism; ko00360 Phenylalanine metabolism; ko00950 Isoquinoline alkaloid biosynthesis; ko00130 Ubiquinone and other terpenoid-quinone biosynthesis; ko00400 Phenylalanine, tyrosine and tryptophan biosynthesis; ko00960 Tropane, piperidine and pyridine alkaloid biosynthesis;	E	Tyrosine aminotransferase
F01_cb5206_c8/f1p2/1835	Ethylene	"""PREDICTED: Cysteine synthase, chloroplastic/chromoplastic OS=Solanum tuberosum PE=2 SV=1"""	0.7	--	0.092696	0.825	Down	0.0072152	1.619	Up	0.00049683	1.374	--	0.08916	GO:0000097 sulfur amino acid biosynthetic process; GO:0016053 organic acid biosynthetic process; GO:0044699 single-organism process; GO:0009058 biosynthetic process; GO:1901566 organonitrogen compound biosynthetic process; GO:0044237 cellular metabolic process; GO:0044272 sulfur compound biosynthetic process; GO:0000096 sulfur amino acid metabolic process; GO:0071704 organic substance metabolic p…	--	GO:0016829 lyase activity; GO:0004124 cysteine synthase activity; GO:0003824 catalytic activity; GO:0016835 carbon-oxygen lyase activity;	sita:101785643; cysteine synthase, chloroplastic/chromoplastic-like; K01738 cysteine synthase A [EC:2.5.1.47] (A)	ko00270 Cysteine and methionine metabolism; ko01200 Carbon metabolism; ko01230 Biosynthesis of amino acids; ko00920 Sulfur metabolism;	E	Cystathionine beta-synthase and related enzymes
F01_cb7523_c0/f1p0/1904	Ethylene	unknown [Picea sitchensis]	0.527	--	0.21654	1.023	--	0.77394	3.31	Up	0.00055554	1.707	--	0.21432	GO:0043648 dicarboxylic acid metabolic process; GO:0000097 sulfur amino acid biosynthetic process; GO:0016053 organic acid biosynthetic process; GO:0009082 branched-chain amino acid biosynthetic process; GO:0009066 aspartate family amino acid metabolic process; GO:0044699 single-organism process; GO:0009058 biosynthetic process; GO:1901566 organonitrogen compound biosynthetic process; GO:0044237 …	GO:0044424 intracellular part; GO:0005623 cell; GO:0044464 cell part; GO:0005622 intracellular; GO:0005737 cytoplasm;	GO:1901265 nucleoside phosphate binding; GO:0046983 protein dimerization activity; GO:0016903 oxidoreductase activity, acting on the aldehyde or oxo group of donors; GO:0005515 protein binding; GO:0000166 nucleotide binding; GO:0048037 cofactor binding; GO:0004073 aspartate-semialdehyde dehydrogenase activity; GO:0016491 oxidoreductase activity; GO:0016620 oxidoreductase activity, acting on the a…	fve:101292991; aspartate-semialdehyde dehydrogenase-like; K00133 aspartate-semialdehyde dehydrogenase [EC:1.2.1.11] (A)	ko00270 Cysteine and methionine metabolism; ko01230 Biosynthesis of amino acids; ko00260 Glycine, serine and threonine metabolism; ko00300 Lysine biosynthesis; ko01210 2-Oxocarboxylic acid metabolism;	E	Aspartate-semialdehyde dehydrogenase
F01_cb7455_c2/f3p0/1995	Ethylene	"""PREDICTED: Malate dehydrogenase, chloroplastic OS=Arabidopsis thaliana GN=At3g47520 PE=1 SV=1"""	0.877	--	0.4572	1.062	--	0.52508	1.46	Up	0.0160952	1.205	--	0.22102	GO:0043648 dicarboxylic acid metabolic process; GO:0055114 oxidation-reduction process; GO:0044281 small molecule metabolic process; GO:0044763 single-organism cellular process; GO:0044699 single-organism process; GO:0005975 carbohydrate metabolic process; GO:0044238 primary metabolic process; GO:0044237 cellular metabolic process; GO:0071704 organic substance metabolic process; GO:0008152 metabo…	--	GO:0016614 oxidoreductase activity, acting on CH-OH group of donors; GO:0016616 oxidoreductase activity, acting on the CH-OH group of donors, NAD or NADP as acceptor; GO:0016615 malate dehydrogenase activity; GO:0003824 catalytic activity; GO:0030060 L-malate dehydrogenase activity; GO:0016491 oxidoreductase activity;	cit:102617795; malate dehydrogenase, mitochondrial-like; K00026 malate dehydrogenase [EC:1.1.1.37] (A)	ko00020 Citrate cycle (TCA cycle); ko00270 Cysteine and methionine metabolism; ko01200 Carbon metabolism; ko00710 Carbon fixation in photosynthetic organisms; ko00620 Pyruvate metabolism; ko00630 Glyoxylate and dicarboxylate metabolism;	C	NAD-dependent malate dehydrogenase
F01_cb12481_c5/f1p1/1607	Ethylene	"""PREDICTED: cysteine synthase, chloroplastic/chromoplastic-like [Setaria italica]"""	0.439	--	0.32986	0.992	--	0.85236	4.879	Up	0.00184041	2.158	--	0.193636	GO:0000097 sulfur amino acid biosynthetic process; GO:0016053 organic acid biosynthetic process; GO:0044699 single-organism process; GO:0009058 biosynthetic process; GO:1901566 organonitrogen compound biosynthetic process; GO:0044237 cellular metabolic process; GO:0044272 sulfur compound biosynthetic process; GO:0000096 sulfur amino acid metabolic process; GO:0071704 organic substance metabolic p…	--	GO:0016829 lyase activity; GO:0004124 cysteine synthase activity; GO:0003824 catalytic activity; GO:0016835 carbon-oxygen lyase activity;	sita:101785643; cysteine synthase, chloroplastic/chromoplastic-like; K01738 cysteine synthase A [EC:2.5.1.47] (A)	ko00270 Cysteine and methionine metabolism; ko01200 Carbon metabolism; ko01230 Biosynthesis of amino acids; ko00920 Sulfur metabolism;	E	Cystathionine beta-synthase and related enzymes
F02_cb10929_c7/f1p0/1645	Ethylene	"""PREDICTED: malate dehydrogenase, mitochondrial-like [Nelumbo nucifera]"""	1.091	--	0.68982	1.125	--	0.50352	1.653	Up	0.037485	1.604	--	0.104798	GO:0043648 dicarboxylic acid metabolic process; GO:0055114 oxidation-reduction process; GO:0044281 small molecule metabolic process; GO:0044763 single-organism cellular process; GO:0044699 single-organism process; GO:0005975 carbohydrate metabolic process; GO:0044238 primary metabolic process; GO:0044237 cellular metabolic process; GO:0071704 organic substance metabolic process; GO:0008152 metabo…	--	GO:0016614 oxidoreductase activity, acting on CH-OH group of donors; GO:0016616 oxidoreductase activity, acting on the CH-OH group of donors, NAD or NADP as acceptor; GO:0016615 malate dehydrogenase activity; GO:0003824 catalytic activity; GO:0030060 L-malate dehydrogenase activity; GO:0016491 oxidoreductase activity;	cit:102617795; malate dehydrogenase, mitochondrial-like; K00026 malate dehydrogenase [EC:1.1.1.37] (A)	ko00020 Citrate cycle (TCA cycle); ko00270 Cysteine and methionine metabolism; ko01200 Carbon metabolism; ko00710 Carbon fixation in photosynthetic organisms; ko00620 Pyruvate metabolism; ko00630 Glyoxylate and dicarboxylate metabolism;	C	NAD-dependent malate dehydrogenase
F02_cb9735_c17470/f3p2/2395	Ethylene	PREDICTED: Adenosylhomocysteinase OS=Nicotiana tabacum GN=SAHH PE=2 SV=1	0.419	--	0.36898	1.018	--	0.9376	2.003	Up	0.016522	0.825	--	0.88106	GO:1901606 alpha-amino acid catabolic process; GO:0009116 nucleoside metabolic process; GO:0042278 purine nucleoside metabolic process; GO:0046498 S-adenosylhomocysteine metabolic process; GO:0006725 cellular aromatic compound metabolic process; GO:0044699 single-organism process; GO:0072523 purine-containing compound catabolic process; GO:0044237 cellular metabolic process; GO:0071704 organic su…	--	GO:0097159 organic cyclic compound binding; GO:1901363 heterocyclic compound binding; GO:0004013 adenosylhomocysteinase activity; GO:0016801 hydrolase activity, acting on ether bonds; GO:1901265 nucleoside phosphate binding; GO:0051287 NAD binding; GO:0003824 catalytic activity; GO:0005488 binding; GO:0016787 hydrolase activity; GO:0000166 nucleotide binding; GO:0048037 cofactor binding; GO:00168…	pda:103717175; adenosylhomocysteinase; K01251 adenosylhomocysteinase [EC:3.3.1.1] (A)	ko00270 Cysteine and methionine metabolism;	H	S-adenosylhomocysteine hydrolase
F01_cb7455_c7/f1p0/1847	Ethylene	"""PREDICTED: Malate dehydrogenase, chloroplastic OS=Arabidopsis thaliana GN=At3g47520 PE=1 SV=1"""	0.807	--	0.58042	1.004	--	0.9367	1.959	Up	0.0101782	1.575	--	0.186724	GO:0043648 dicarboxylic acid metabolic process; GO:0055114 oxidation-reduction process; GO:0044281 small molecule metabolic process; GO:0044763 single-organism cellular process; GO:0044699 single-organism process; GO:0044238 primary metabolic process; GO:0005975 carbohydrate metabolic process; GO:0044237 cellular metabolic process; GO:0071704 organic substance metabolic process; GO:0008152 metabo…	--	GO:0016614 oxidoreductase activity, acting on CH-OH group of donors; GO:0016616 oxidoreductase activity, acting on the CH-OH group of donors, NAD or NADP as acceptor; GO:0016615 malate dehydrogenase activity; GO:0003824 catalytic activity; GO:0030060 L-malate dehydrogenase activity; GO:0016491 oxidoreductase activity;	cit:102617795; malate dehydrogenase, mitochondrial-like; K00026 malate dehydrogenase [EC:1.1.1.37] (A)	ko00020 Citrate cycle (TCA cycle); ko00270 Cysteine and methionine metabolism; ko01200 Carbon metabolism; ko00710 Carbon fixation in photosynthetic organisms; ko00620 Pyruvate metabolism; ko00630 Glyoxylate and dicarboxylate metabolism;	C	NAD-dependent malate dehydrogenase
F01_cb10058_c7/f1p1/1011	Ethylene	"""PREDICTED: 1,2-dihydroxy-3-keto-5-methylthiopentene dioxygenase 2 OS=Vitis vinifera GN=VIT_05s0020g04080 PE=3 SV=1"""	1.039	--	0.7289	0.904	--	0.35034	1.309	Up	0.023323	1.505	--	0.148965	GO:0000097 sulfur amino acid biosynthetic process; GO:0016053 organic acid biosynthetic process; GO:0019509 L-methionine salvage from methylthioadenosine; GO:0009066 aspartate family amino acid metabolic process; GO:0044699 single-organism process; GO:0009058 biosynthetic process; GO:1901566 organonitrogen compound biosynthetic process; GO:0044237 cellular metabolic process; GO:0000096 sulfur ami…	--	GO:0016702 oxidoreductase activity, acting on single donors with incorporation of molecular oxygen, incorporation of two atoms of oxygen; GO:0010309 acireductone dioxygenase [iron(II)-requiring] activity; GO:0016701 oxidoreductase activity, acting on single donors with incorporation of molecular oxygen; GO:0003824 catalytic activity; GO:0051213 dioxygenase activity; GO:0016491 oxidoreductase acti…	ppp:PHYPADRAFT_134384; hypothetical protein; K08967 1,2-dihydroxy-3-keto-5-methylthiopentene dioxygenase [EC:1.13.11.53 1.13.11.54] (A)	ko00270 Cysteine and methionine metabolism;	S	Uncharacterized conserved protein, contains double-stranded beta-helix domain
F01_cb7431_c5/f1p1/2139	Ethylene	"""PREDICTED: Aspartate aminotransferase, mitochondrial OS=Arabidopsis thaliana GN=ASP1 PE=1 SV=1"""	0.462	--	0.168457	1.158	--	0.43368	4.138	Up	0.00155805	1.653	--	0.2408	GO:0044281 small molecule metabolic process; GO:0044763 single-organism cellular process; GO:0006807 nitrogen compound metabolic process; GO:0044699 single-organism process; GO:0009058 biosynthetic process; GO:0044238 primary metabolic process; GO:0044237 cellular metabolic process; GO:0071704 organic substance metabolic process; GO:0008152 metabolic process; GO:0006520 cellular amino acid metabo…	--	GO:0097159 organic cyclic compound binding; GO:1901363 heterocyclic compound binding; GO:0016769 transferase activity, transferring nitrogenous groups; GO:0003824 catalytic activity; GO:0005488 binding; GO:0043167 ion binding; GO:0043168 anion binding; GO:0008483 transaminase activity; GO:0016740 transferase activity; GO:0048037 cofactor binding; GO:0030170 pyridoxal phosphate binding;	atr:s00170p00032930; AMTR_s00170p00032930; hypothetical protein; K14455 aspartate aminotransferase, mitochondrial [EC:2.6.1.1] (A)	ko00270 Cysteine and methionine metabolism; ko00710 Carbon fixation in photosynthetic organisms; ko01230 Biosynthesis of amino acids; ko00350 Tyrosine metabolism; ko00360 Phenylalanine metabolism; ko00950 Isoquinoline alkaloid biosynthesis; ko01210 2-Oxocarboxylic acid metabolism; ko00250 Alanine, aspartate and glutamate metabolism; ko00330 Arginine and proline metabolism; ko01200 Carbon metaboli…	E	Aspartate aminotransferase/Glutamic oxaloacetic transaminase AAT1/GOT2
F02_cb10805_c17/f1p0/1406	Ethylene	PREDICTED: Cysteine synthase OS=Oryza sativa subsp. japonica GN=RCS3 PE=2 SV=1	1.005	--	0.89462	0.854	--	0.019441	1.4	Up	0.00082245	1.648	Up	0.00073574	GO:0000097 sulfur amino acid biosynthetic process; GO:0016053 organic acid biosynthetic process; GO:0044699 single-organism process; GO:0009058 biosynthetic process; GO:1901566 organonitrogen compound biosynthetic process; GO:0044237 cellular metabolic process; GO:0044272 sulfur compound biosynthetic process; GO:0000096 sulfur amino acid metabolic process; GO:0071704 organic substance metabolic p…	--	GO:0016829 lyase activity; GO:0004124 cysteine synthase activity; GO:0003824 catalytic activity; GO:0016835 carbon-oxygen lyase activity;	sita:101785643; cysteine synthase, chloroplastic/chromoplastic-like; K01738 cysteine synthase A [EC:2.5.1.47] (A)	ko00270 Cysteine and methionine metabolism; ko01200 Carbon metabolism; ko01230 Biosynthesis of amino acids; ko00920 Sulfur metabolism;	E	Cystathionine beta-synthase and related enzymes
F01_cb11709_c5/f1p1/1006	Ethylene	"""PREDICTED: 1,2-dihydroxy-3-keto-5-methylthiopentene dioxygenase 1 OS=Physcomitrella patens subsp. patens GN=PHYPADRAFT_128349 PE=3 SV=1"""	0.463	--	0.122965	1.17	--	0.28188	4.259	Up	0.0007804	1.686	--	0.2056	GO:0000097 sulfur amino acid biosynthetic process; GO:0016053 organic acid biosynthetic process; GO:0019509 L-methionine salvage from methylthioadenosine; GO:0009066 aspartate family amino acid metabolic process; GO:0044699 single-organism process; GO:0009058 biosynthetic process; GO:1901566 organonitrogen compound biosynthetic process; GO:0044237 cellular metabolic process; GO:0000096 sulfur ami…	--	GO:0016702 oxidoreductase activity, acting on single donors with incorporation of molecular oxygen, incorporation of two atoms of oxygen; GO:0010309 acireductone dioxygenase [iron(II)-requiring] activity; GO:0016701 oxidoreductase activity, acting on single donors with incorporation of molecular oxygen; GO:0003824 catalytic activity; GO:0051213 dioxygenase activity; GO:0016491 oxidoreductase acti…	ppp:PHYPADRAFT_134384; hypothetical protein; K08967 1,2-dihydroxy-3-keto-5-methylthiopentene dioxygenase [EC:1.13.11.53 1.13.11.54] (A)	ko00270 Cysteine and methionine metabolism;	S	Uncharacterized conserved protein, contains double-stranded beta-helix domain
F01_cb5000_c3273/f1p0/2406	Ethylene	PREDICTED: 5-methyltetrahydropteroyltriglutamateNAhomocysteine methyltransferase 2 OS=Oryza sativa subsp. japonica GN=Os12g0624000 PE=2 SV=1	0.667	--	0.063601	1.157	--	0.26552	2.323	Up	0.0024965	1.338	--	0.098303	GO:0000097 sulfur amino acid biosynthetic process; GO:0016053 organic acid biosynthetic process; GO:0009066 aspartate family amino acid metabolic process; GO:0044699 single-organism process; GO:0009058 biosynthetic process; GO:1901566 organonitrogen compound biosynthetic process; GO:0044237 cellular metabolic process; GO:0000096 sulfur amino acid metabolic process; GO:0044272 sulfur compound bios…	--	GO:0042085 5-methyltetrahydropteroyltri-L-glutamate-dependent methyltransferase activity; GO:0008168 methyltransferase activity; GO:0046914 transition metal ion binding; GO:0003824 catalytic activity; GO:0005488 binding; GO:0008172 S-methyltransferase activity; GO:0043167 ion binding; GO:0016741 transferase activity, transferring one-carbon groups; GO:0046872 metal ion binding; GO:0043169 cation …	pda:103698689; 5-methyltetrahydropteroyltriglutamateNAhomocysteine methyltransferase 1; K00549 5-methyltetrahydropteroyltriglutamateNAhomocysteine methyltransferase [EC:2.1.1.14] (A)	ko00270 Cysteine and methionine metabolism; ko01230 Biosynthesis of amino acids; ko00450 Selenocompound metabolism;	E	Methionine synthase II (cobalamin-independent)
F02_cb1418_c6/f1p0/3249	Ethylene	"""PREDICTED: bifunctional aspartokinase/homoserine dehydrogenase 1, chloroplastic-like [Nelumbo nucifera]"""	0.691	--	0.183458	0.964	--	0.4859	2.682	Up	0.000276	1.921	--	0.075203	GO:0008652 cellular amino acid biosynthetic process; GO:0016053 organic acid biosynthetic process; GO:0044711 single-organism biosynthetic process; GO:0055114 oxidation-reduction process; GO:0044281 small molecule metabolic process; GO:0044763 single-organism cellular process; GO:0006807 nitrogen compound metabolic process; GO:0044699 single-organism process; GO:0009058 biosynthetic process; GO:0…	--	GO:0016597 amino acid binding; GO:1901265 nucleoside phosphate binding; GO:0043167 ion binding; GO:0043177 organic acid binding; GO:0004072 aspartate kinase activity; GO:0000166 nucleotide binding; GO:0048037 cofactor binding; GO:0016491 oxidoreductase activity; GO:1901363 heterocyclic compound binding; GO:0097159 organic cyclic compound binding; GO:0016774 phosphotransferase activity, carboxyl g…	cit:102628536; bifunctional aspartokinase/homoserine dehydrogenase 1, chloroplastic-like; K12524 bifunctional aspartokinase / homoserine dehydrogenase 1 [EC:2.7.2.4 1.1.1.3] (A)	ko00270 Cysteine and methionine metabolism; ko01230 Biosynthesis of amino acids; ko00260 Glycine, serine and threonine metabolism; ko00300 Lysine biosynthesis;	E	Homoserine dehydrogenase
F01_cb9024_c3/f1p0/1719	Ethylene	"""PREDICTED: Thiosulfate/3-mercaptopyruvate sulfurtransferase 1, mitochondrial OS=Arabidopsis thaliana GN=STR1 PE=1 SV=1"""	0.525	--	0.125177	0.942	--	0.21734	2.409	Up	2.12e-05	1.343	--	0.27938	--	--	GO:0004792 thiosulfate sulfurtransferase activity; GO:0016782 transferase activity, transferring sulfur-containing groups; GO:0016783 sulfurtransferase activity; GO:0003824 catalytic activity; GO:0016740 transferase activity;	atr:s00032p00026180; AMTR_s00032p00026180; hypothetical protein; K01011 thiosulfate/3-mercaptopyruvate sulfurtransferase [EC:2.8.1.1 2.8.1.2] (A)	ko04122 Sulfur relay system; ko00270 Cysteine and methionine metabolism; ko00920 Sulfur metabolism;	V	Mercaptopyruvate sulfurtransferase/thiosulfate sulfurtransferase
F01_cb11796_c0/f3p0/1365	Ethylene	PREDICTED: Malate dehydrogenase OS=Nicotiana tabacum GN=MD1 PE=1 SV=1	0.287	--	0.150238	0.993	--	0.88952	5.209	Up	0.00063948	1.503	--	0.36646	GO:0043648 dicarboxylic acid metabolic process; GO:0055114 oxidation-reduction process; GO:0044281 small molecule metabolic process; GO:0044763 single-organism cellular process; GO:0044699 single-organism process; GO:0005975 carbohydrate metabolic process; GO:0044238 primary metabolic process; GO:0044237 cellular metabolic process; GO:0071704 organic substance metabolic process; GO:0008152 metabo…	--	GO:0016614 oxidoreductase activity, acting on CH-OH group of donors; GO:0016616 oxidoreductase activity, acting on the CH-OH group of donors, NAD or NADP as acceptor; GO:0016615 malate dehydrogenase activity; GO:0003824 catalytic activity; GO:0030060 L-malate dehydrogenase activity; GO:0016491 oxidoreductase activity;	sly:101253131; malate dehydrogenase; K00025 malate dehydrogenase [EC:1.1.1.37] (A)	ko00020 Citrate cycle (TCA cycle); ko00270 Cysteine and methionine metabolism; ko01200 Carbon metabolism; ko00710 Carbon fixation in photosynthetic organisms; ko00620 Pyruvate metabolism; ko00630 Glyoxylate and dicarboxylate metabolism;	C	Malate dehydrogenase
F02_cb12495_c3/f2p1/1556	Ethylene	putative spermidine synthase [Pinus sylvestris]	0.522	--	0.060435	0.922	--	0.25846	2.483	Up	0.00134337	1.406	--	0.2193	--	--	GO:0003824 catalytic activity;	gmx:100776863; spermidine synthase 2-like; K00797 spermidine synthase [EC:2.5.1.16] (A)	ko00270 Cysteine and methionine metabolism; ko00330 Arginine and proline metabolism; ko00480 Glutathione metabolism; ko00410 beta-Alanine metabolism;	E	Spermidine synthase
F01_cb6737_c13/f1p0/1997	Ethylene	PREDICTED: methylthioribose kinase [Nelumbo nucifera]	0.54	--	0.092802	0.979	--	0.88484	3.338	Up	0.00063794	1.841	--	0.067441	GO:0000097 sulfur amino acid biosynthetic process; GO:0016053 organic acid biosynthetic process; GO:0009066 aspartate family amino acid metabolic process; GO:0044699 single-organism process; GO:0009058 biosynthetic process; GO:1901566 organonitrogen compound biosynthetic process; GO:0044237 cellular metabolic process; GO:0044272 sulfur compound biosynthetic process; GO:0000096 sulfur amino acid m…	--	GO:0046522 S-methyl-5-thioribose kinase activity; GO:0016301 kinase activity; GO:0016773 phosphotransferase activity, alcohol group as acceptor; GO:0003824 catalytic activity; GO:0016740 transferase activity; GO:0016772 transferase activity, transferring phosphorus-containing groups;	pvu:PHAVU_007G040800g; hypothetical protein; K00899 5-methylthioribose kinase [EC:2.7.1.100] (A)	ko00270 Cysteine and methionine metabolism;	--	--
F01_cb10295_c0/f2p0/1491	Ethylene	acc oxidase [Pinus pinaster]	1.089	--	0.7876	0.911	--	0.6131	3.327	--	0.111901	3.977	Up	0.0033568	GO:0044699 single-organism process; GO:0008152 metabolic process; GO:0055114 oxidation-reduction process; GO:0044710 single-organism metabolic process;	--	GO:0003824 catalytic activity; GO:0016491 oxidoreductase activity;	pda:103701356; 1-aminocyclopropane-1-carboxylate oxidase; K05933 aminocyclopropanecarboxylate oxidase [EC:1.14.17.4] (A)	ko00270 Cysteine and methionine metabolism;	QR	Iron/ascorbate family oxidoreductases
F01_cb10620_c4/f4p0/1340	SA	PREDICTED: Peroxisomal fatty acid beta-oxidation multifunctional protein AIM1 OS=Arabidopsis thaliana GN=AIM1 PE=1 SV=1	0.637	Down	0.02592	0.626	Down	0.048335	1.395	--	0.057543	1.419	--	0.108664	GO:0055114 oxidation-reduction process; GO:0044281 small molecule metabolic process; GO:0044763 single-organism cellular process; GO:0044699 single-organism process; GO:0044255 cellular lipid metabolic process; GO:0006631 fatty acid metabolic process; GO:0044238 primary metabolic process; GO:0044237 cellular metabolic process; GO:0071704 organic substance metabolic process; GO:0008152 metabolic p…	--	GO:1901265 nucleoside phosphate binding; GO:0043167 ion binding; GO:0070403 NAD+ binding; GO:0000166 nucleotide binding; GO:0048037 cofactor binding; GO:0016491 oxidoreductase activity; GO:1901363 heterocyclic compound binding; GO:0097159 organic cyclic compound binding; GO:0016614 oxidoreductase activity, acting on CH-OH group of donors; GO:0016616 oxidoreductase activity, acting on the CH-OH gr…	pmum:103326052; probable 3-hydroxyacyl-CoA dehydrogenase B0272.3; K00074 3-hydroxybutyryl-CoA dehydrogenase [EC:1.1.1.157] (A)	ko00360 Phenylalanine metabolism; ko00650 Butanoate metabolism;	I	3-hydroxyacyl-CoA dehydrogenase
F02_cb14488_c0/f1p0/1425	SA	class III secretory peroxidase [Ginkgo biloba]	0.323	Down	0.0098829	--	--	--	--	--	--	--	--	--	GO:0008152 metabolic process; GO:0042743 hydrogen peroxide metabolic process; GO:0006950 response to stress; GO:0072593 reactive oxygen species metabolic process; GO:0055114 oxidation-reduction process; GO:0044710 single-organism metabolic process; GO:0006979 response to oxidative stress; GO:0044699 single-organism process; GO:0044248 cellular catabolic process; GO:0050896 response to stimulus; G…	--	GO:0097159 organic cyclic compound binding; GO:1901363 heterocyclic compound binding; GO:0020037 heme binding; GO:0003824 catalytic activity; GO:0005488 binding; GO:0016209 antioxidant activity; GO:0004601 peroxidase activity; GO:0046906 tetrapyrrole binding; GO:0016491 oxidoreductase activity; GO:0016684 oxidoreductase activity, acting on peroxide as acceptor;	pda:103703770; peroxidase 72-like; K00430 peroxidase [EC:1.11.1.7] (A)	ko00940 Phenylpropanoid biosynthesis; ko00360 Phenylalanine metabolism;	--	--
F02_cb15366_c1/f1p0/1153	SA	peroxidase [Picea abies]	2.471	Up	0.0138557	1.394	Up	0.041965	0.092	Down	3.8e-05	0.163	Down	0.00132337	GO:0008152 metabolic process; GO:0042743 hydrogen peroxide metabolic process; GO:0006950 response to stress; GO:0072593 reactive oxygen species metabolic process; GO:0055114 oxidation-reduction process; GO:0044710 single-organism metabolic process; GO:0006979 response to oxidative stress; GO:0044699 single-organism process; GO:0044248 cellular catabolic process; GO:0050896 response to stimulus; G…	--	GO:0097159 organic cyclic compound binding; GO:1901363 heterocyclic compound binding; GO:0020037 heme binding; GO:0003824 catalytic activity; GO:0005488 binding; GO:0016209 antioxidant activity; GO:0004601 peroxidase activity; GO:0046906 tetrapyrrole binding; GO:0016491 oxidoreductase activity; GO:0016684 oxidoreductase activity, acting on peroxide as acceptor;	pda:103703770; peroxidase 72-like; K00430 peroxidase [EC:1.11.1.7] (A)	ko00940 Phenylpropanoid biosynthesis; ko00360 Phenylalanine metabolism;	--	--
F01_cb11992_c7/f1p0/1271	SA	PREDICTED: Peroxidase 40 OS=Arabidopsis thaliana GN=PER40 PE=2 SV=2	7.191	Up	0.0176358	1.188	--	0.5434	0.2	Down	0.040744	1.213	--	0.96994	GO:0008152 metabolic process; GO:0042743 hydrogen peroxide metabolic process; GO:0006950 response to stress; GO:0072593 reactive oxygen species metabolic process; GO:0055114 oxidation-reduction process; GO:0044710 single-organism metabolic process; GO:0006979 response to oxidative stress; GO:0044699 single-organism process; GO:0044248 cellular catabolic process; GO:0050896 response to stimulus; G…	--	GO:0097159 organic cyclic compound binding; GO:1901363 heterocyclic compound binding; GO:0020037 heme binding; GO:0003824 catalytic activity; GO:0005488 binding; GO:0016209 antioxidant activity; GO:0004601 peroxidase activity; GO:0046906 tetrapyrrole binding; GO:0016491 oxidoreductase activity; GO:0016684 oxidoreductase activity, acting on peroxide as acceptor;	pda:103703770; peroxidase 72-like; K00430 peroxidase [EC:1.11.1.7] (A)	ko00940 Phenylpropanoid biosynthesis; ko00360 Phenylalanine metabolism;	--	--
F02_cb11281_c5/f1p0/1022	SA	PREDICTED: Peroxidase 53 OS=Arabidopsis thaliana GN=PER53 PE=1 SV=1	3.34	Up	0.0049818	2.376	Up	0.047564	0.241	Down	0.0051617	0.339	Down	0.0158014	GO:0008152 metabolic process; GO:0042743 hydrogen peroxide metabolic process; GO:0006950 response to stress; GO:0072593 reactive oxygen species metabolic process; GO:0055114 oxidation-reduction process; GO:0044710 single-organism metabolic process; GO:0006979 response to oxidative stress; GO:0044699 single-organism process; GO:0044248 cellular catabolic process; GO:0050896 response to stimulus; G…	--	GO:0097159 organic cyclic compound binding; GO:1901363 heterocyclic compound binding; GO:0020037 heme binding; GO:0003824 catalytic activity; GO:0005488 binding; GO:0016209 antioxidant activity; GO:0004601 peroxidase activity; GO:0046906 tetrapyrrole binding; GO:0016491 oxidoreductase activity; GO:0016684 oxidoreductase activity, acting on peroxide as acceptor;	pda:103703770; peroxidase 72-like; K00430 peroxidase [EC:1.11.1.7] (A)	ko00940 Phenylpropanoid biosynthesis; ko00360 Phenylalanine metabolism;	--	--
F02_cb15297_c1/f1p0/1379	SA	PREDICTED: Peroxidase 4 OS=Vitis vinifera GN=GSVIVT00023967001 PE=1 SV=1	2.177	Up	0.0126435	0.747	--	0.198502	0.261	Down	0.0033426	0.76	--	0.15956	GO:0008152 metabolic process; GO:0042743 hydrogen peroxide metabolic process; GO:0006950 response to stress; GO:0072593 reactive oxygen species metabolic process; GO:0055114 oxidation-reduction process; GO:0044710 single-organism metabolic process; GO:0006979 response to oxidative stress; GO:0044699 single-organism process; GO:0044248 cellular catabolic process; GO:0050896 response to stimulus; G…	--	GO:0097159 organic cyclic compound binding; GO:1901363 heterocyclic compound binding; GO:0020037 heme binding; GO:0003824 catalytic activity; GO:0005488 binding; GO:0016209 antioxidant activity; GO:0004601 peroxidase activity; GO:0046906 tetrapyrrole binding; GO:0016491 oxidoreductase activity; GO:0016684 oxidoreductase activity, acting on peroxide as acceptor;	pda:103703770; peroxidase 72-like; K00430 peroxidase [EC:1.11.1.7] (A)	ko00940 Phenylpropanoid biosynthesis; ko00360 Phenylalanine metabolism;	--	--
F02_cb9572_c1/f5p0/1298	SA	PREDICTED: peroxidase 44 [Prunus mume]	3.119	Up	0.0094635	2.085	Up	0.0081622	0.139	Down	0.00068117	0.209	Down	0.00146192	GO:0008152 metabolic process; GO:0042743 hydrogen peroxide metabolic process; GO:0006950 response to stress; GO:0072593 reactive oxygen species metabolic process; GO:0055114 oxidation-reduction process; GO:0044710 single-organism metabolic process; GO:0006979 response to oxidative stress; GO:0044699 single-organism process; GO:0044248 cellular catabolic process; GO:0050896 response to stimulus; G…	--	GO:0097159 organic cyclic compound binding; GO:1901363 heterocyclic compound binding; GO:0020037 heme binding; GO:0003824 catalytic activity; GO:0005488 binding; GO:0016209 antioxidant activity; GO:0004601 peroxidase activity; GO:0046906 tetrapyrrole binding; GO:0016491 oxidoreductase activity; GO:0016684 oxidoreductase activity, acting on peroxide as acceptor;	pda:103703770; peroxidase 72-like; K00430 peroxidase [EC:1.11.1.7] (A)	ko00940 Phenylpropanoid biosynthesis; ko00360 Phenylalanine metabolism;	--	--
F02_cb12661_c0/f2p0/1627	SA	PREDICTED: peroxidase 17 [Nicotiana sylvestris]	2.256	Up	0.039783	0.752	--	0.076344	0.05	Down	2e-05	0.149	Down	0.0033805	GO:0008152 metabolic process; GO:0042743 hydrogen peroxide metabolic process; GO:0006950 response to stress; GO:0072593 reactive oxygen species metabolic process; GO:0055114 oxidation-reduction process; GO:0044710 single-organism metabolic process; GO:0006979 response to oxidative stress; GO:0044699 single-organism process; GO:0044248 cellular catabolic process; GO:0050896 response to stimulus; G…	--	GO:0097159 organic cyclic compound binding; GO:1901363 heterocyclic compound binding; GO:0020037 heme binding; GO:0003824 catalytic activity; GO:0005488 binding; GO:0016209 antioxidant activity; GO:0004601 peroxidase activity; GO:0046906 tetrapyrrole binding; GO:0016491 oxidoreductase activity; GO:0016684 oxidoreductase activity, acting on peroxide as acceptor;	pda:103703770; peroxidase 72-like; K00430 peroxidase [EC:1.11.1.7] (A)	ko00940 Phenylpropanoid biosynthesis; ko00360 Phenylalanine metabolism;	--	--
F02_cb6831_c3/f3p1/1977	SA	PREDICTED: Peroxidase 63 OS=Arabidopsis thaliana GN=PER63 PE=2 SV=1	2.457	Up	0.030041	1.31	--	0.26982	0.179	Down	0.00132019	0.335	Down	0.022819	GO:0008152 metabolic process; GO:0042743 hydrogen peroxide metabolic process; GO:0006950 response to stress; GO:0072593 reactive oxygen species metabolic process; GO:0055114 oxidation-reduction process; GO:0044710 single-organism metabolic process; GO:0006979 response to oxidative stress; GO:0044699 single-organism process; GO:0044248 cellular catabolic process; GO:0050896 response to stimulus; G…	--	GO:0097159 organic cyclic compound binding; GO:1901363 heterocyclic compound binding; GO:0020037 heme binding; GO:0003824 catalytic activity; GO:0005488 binding; GO:0016209 antioxidant activity; GO:0004601 peroxidase activity; GO:0046906 tetrapyrrole binding; GO:0016491 oxidoreductase activity; GO:0016684 oxidoreductase activity, acting on peroxide as acceptor;	pda:103703770; peroxidase 72-like; K00430 peroxidase [EC:1.11.1.7] (A)	ko00940 Phenylpropanoid biosynthesis; ko00360 Phenylalanine metabolism;	--	--
F02_cb15366_c2/f1p0/1182	SA	peroxidase [Picea abies]	2.109	Up	0.031961	1.005	--	0.91678	0.076	Down	0.00035881	0.16	Down	0.00074275	GO:0008152 metabolic process; GO:0042743 hydrogen peroxide metabolic process; GO:0006950 response to stress; GO:0072593 reactive oxygen species metabolic process; GO:0055114 oxidation-reduction process; GO:0044710 single-organism metabolic process; GO:0006979 response to oxidative stress; GO:0044699 single-organism process; GO:0044248 cellular catabolic process; GO:0050896 response to stimulus; G…	--	GO:0097159 organic cyclic compound binding; GO:1901363 heterocyclic compound binding; GO:0020037 heme binding; GO:0003824 catalytic activity; GO:0005488 binding; GO:0016209 antioxidant activity; GO:0004601 peroxidase activity; GO:0046906 tetrapyrrole binding; GO:0016491 oxidoreductase activity; GO:0016684 oxidoreductase activity, acting on peroxide as acceptor;	pda:103703770; peroxidase 72-like; K00430 peroxidase [EC:1.11.1.7] (A)	ko00940 Phenylpropanoid biosynthesis; ko00360 Phenylalanine metabolism;	--	--
F02_cb6007_c7/f1p0/1930	SA	PREDICTED: 4-coumarateNACoA ligase-like 7 OS=Arabidopsis thaliana GN=4CLL7 PE=1 SV=1	1.85	Up	0.00047767	--	--	--	--	--	--	--	--	--	GO:0008152 metabolic process;	--	GO:0003824 catalytic activity;	fve:101313178; 4-coumarateNACoA ligase 1-like; K01904 4-coumarateNACoA ligase [EC:6.2.1.12] (A)	ko00130 Ubiquinone and other terpenoid-quinone biosynthesis; ko00940 Phenylpropanoid biosynthesis; ko00360 Phenylalanine metabolism;	I	Acyl-CoA synthetase
F01_cb12936_c0/f4p0/1091	SA	peroxidase [Picea abies]	1.464	Up	0.030424	0.814	--	0.4926	0.183	Down	0.02116	0.329	Down	0.0070352	GO:0008152 metabolic process; GO:0042743 hydrogen peroxide metabolic process; GO:0006950 response to stress; GO:0072593 reactive oxygen species metabolic process; GO:0055114 oxidation-reduction process; GO:0044710 single-organism metabolic process; GO:0006979 response to oxidative stress; GO:0044699 single-organism process; GO:0044248 cellular catabolic process; GO:0050896 response to stimulus; G…	--	GO:0097159 organic cyclic compound binding; GO:1901363 heterocyclic compound binding; GO:0020037 heme binding; GO:0003824 catalytic activity; GO:0005488 binding; GO:0016209 antioxidant activity; GO:0004601 peroxidase activity; GO:0046906 tetrapyrrole binding; GO:0016491 oxidoreductase activity; GO:0016684 oxidoreductase activity, acting on peroxide as acceptor;	pda:103703770; peroxidase 72-like; K00430 peroxidase [EC:1.11.1.7] (A)	ko00940 Phenylpropanoid biosynthesis; ko00360 Phenylalanine metabolism;	--	--
F02_cb12814_c2/f1p0/1292	SA	PREDICTED: peroxidase 5-like [Populus euphratica]	2.26	Up	0.0091791	1.513	Up	0.04732	0.178	Down	0.00093817	0.266	Down	0.000182294	GO:0008152 metabolic process; GO:0042743 hydrogen peroxide metabolic process; GO:0006950 response to stress; GO:0072593 reactive oxygen species metabolic process; GO:0055114 oxidation-reduction process; GO:0044710 single-organism metabolic process; GO:0006979 response to oxidative stress; GO:0044699 single-organism process; GO:0044248 cellular catabolic process; GO:0050896 response to stimulus; G…	--	GO:0097159 organic cyclic compound binding; GO:1901363 heterocyclic compound binding; GO:0020037 heme binding; GO:0003824 catalytic activity; GO:0005488 binding; GO:0016209 antioxidant activity; GO:0004601 peroxidase activity; GO:0046906 tetrapyrrole binding; GO:0016491 oxidoreductase activity; GO:0016684 oxidoreductase activity, acting on peroxide as acceptor;	pda:103703770; peroxidase 72-like; K00430 peroxidase [EC:1.11.1.7] (A)	ko00940 Phenylpropanoid biosynthesis; ko00360 Phenylalanine metabolism;	--	--
F02_cb951_c17/f1p0/3784	SA	PREDICTED: Primary amine oxidase OS=Pisum sativum PE=1 SV=1	0.507	--	0.058338	0.555	Down	0.043299	1.695	Up	0.0143426	1.548	--	0.191122	GO:0008152 metabolic process; GO:0055114 oxidation-reduction process; GO:0044710 single-organism metabolic process; GO:0044699 single-organism process; GO:0006807 nitrogen compound metabolic process; GO:0009308 amine metabolic process; GO:0071704 organic substance metabolic process; GO:1901564 organonitrogen compound metabolic process;	--	GO:0046914 transition metal ion binding; GO:0003824 catalytic activity; GO:0005488 binding; GO:0043167 ion binding; GO:0046872 metal ion binding; GO:0043169 cation binding; GO:0008131 primary amine oxidase activity; GO:0005507 copper ion binding; GO:0016641 oxidoreductase activity, acting on the CH-NH2 group of donors, oxygen as acceptor; GO:0016638 oxidoreductase activity, acting on the CH-NH2 g…	cmo:103502378; copper amine oxidase 1; K00276 primary-amine oxidase [EC:1.4.3.21] (A)	ko00260 Glycine, serine and threonine metabolism; ko00410 beta-Alanine metabolism; ko00350 Tyrosine metabolism; ko00360 Phenylalanine metabolism; ko00950 Isoquinoline alkaloid biosynthesis; ko00960 Tropane, piperidine and pyridine alkaloid biosynthesis;	Q	Copper amine oxidase
F02_cb8637_c7/f1p0/1159	SA	PREDICTED: Peroxidase 51 OS=Arabidopsis thaliana GN=PER51 PE=2 SV=1	--	--	--	2.731	Up	0.041439	--	--	--	--	--	--	GO:0008152 metabolic process; GO:0006950 response to stress; GO:0055114 oxidation-reduction process; GO:0044710 single-organism metabolic process; GO:0006979 response to oxidative stress; GO:0044699 single-organism process; GO:0050896 response to stimulus;	--	GO:0097159 organic cyclic compound binding; GO:1901363 heterocyclic compound binding; GO:0020037 heme binding; GO:0003824 catalytic activity; GO:0005488 binding; GO:0016209 antioxidant activity; GO:0004601 peroxidase activity; GO:0046906 tetrapyrrole binding; GO:0016491 oxidoreductase activity; GO:0016684 oxidoreductase activity, acting on peroxide as acceptor;	pda:103703770; peroxidase 72-like; K00430 peroxidase [EC:1.11.1.7] (A)	ko00940 Phenylpropanoid biosynthesis; ko00360 Phenylalanine metabolism;	--	--
F02_cb7015_c10/f1p0/1922	SA	trans-cinnamate 4-hydroxylase [Pinus taeda]	0.962	--	0.86732	2.717	Up	0.038884	1.269	--	0.6116	0.449	--	0.27962	GO:0044699 single-organism process; GO:0008152 metabolic process; GO:0055114 oxidation-reduction process; GO:0044710 single-organism metabolic process;	--	GO:0097159 organic cyclic compound binding; GO:1901363 heterocyclic compound binding; GO:0020037 heme binding; GO:0005506 iron ion binding; GO:0046914 transition metal ion binding; GO:0003824 catalytic activity; GO:0005488 binding; GO:0043167 ion binding; GO:0043169 cation binding; GO:0046872 metal ion binding; GO:0016705 oxidoreductase activity, acting on paired donors, with incorporation or red…	tcc:TCM_045554; Cinnamate-4-hydroxylase; K00487 trans-cinnamate 4-monooxygenase [EC:1.14.13.11] (A)	ko00945 Stilbenoid, diarylheptanoid and gingerol biosynthesis; ko00130 Ubiquinone and other terpenoid-quinone biosynthesis; ko00941 Flavonoid biosynthesis; ko00940 Phenylpropanoid biosynthesis; ko01220 Degradation of aromatic compounds; ko00360 Phenylalanine metabolism;	Q	Cytochrome P450 CYP2 subfamily
F02_cb8967_c5/f1p0/1152	SA	PREDICTED: Caffeoyl-CoA O-methyltransferase OS=Pinus taeda GN=CCOAOMT PE=2 SV=1	--	--	--	11.411	Up	0.00030461	--	--	--	--	--	--	--	--	GO:0016741 transferase activity, transferring one-carbon groups; GO:0008171 O-methyltransferase activity; GO:0008168 methyltransferase activity; GO:0003824 catalytic activity; GO:0016740 transferase activity;	atr:s00046p00069700; AMTR_s00046p00069700; hypothetical protein; K00588 caffeoyl-CoA O-methyltransferase [EC:2.1.1.104] (A)	ko00945 Stilbenoid, diarylheptanoid and gingerol biosynthesis; ko00941 Flavonoid biosynthesis; ko00940 Phenylpropanoid biosynthesis; ko00360 Phenylalanine metabolism;	Q	O-methyltransferase
F02_cb15482_c1/f1p0/1375	SA	class III peroxidase PSYP1 [Pinus sylvestris]	0.099	--	0.2758	0.298	Down	0.037817	0.458	Down	0.0052617	0.153	--	0.33758	GO:0008152 metabolic process; GO:0042743 hydrogen peroxide metabolic process; GO:0006950 response to stress; GO:0072593 reactive oxygen species metabolic process; GO:0055114 oxidation-reduction process; GO:0044710 single-organism metabolic process; GO:0006979 response to oxidative stress; GO:0044699 single-organism process; GO:0044248 cellular catabolic process; GO:0050896 response to stimulus; G…	--	GO:0097159 organic cyclic compound binding; GO:1901363 heterocyclic compound binding; GO:0020037 heme binding; GO:0003824 catalytic activity; GO:0005488 binding; GO:0016209 antioxidant activity; GO:0004601 peroxidase activity; GO:0046906 tetrapyrrole binding; GO:0016491 oxidoreductase activity; GO:0016684 oxidoreductase activity, acting on peroxide as acceptor;	pda:103703770; peroxidase 72-like; K00430 peroxidase [EC:1.11.1.7] (A)	ko00940 Phenylpropanoid biosynthesis; ko00360 Phenylalanine metabolism;	--	--
F01_cb7186_c2/f3p0/1248	SA	PREDICTED: Caffeoyl-CoA O-methyltransferase OS=Pinus taeda GN=CCOAOMT PE=2 SV=1	--	--	--	0.216	Down	0.0027398	--	--	--	--	--	--	--	--	GO:0016741 transferase activity, transferring one-carbon groups; GO:0008171 O-methyltransferase activity; GO:0008168 methyltransferase activity; GO:0003824 catalytic activity; GO:0016740 transferase activity;	atr:s00046p00069700; AMTR_s00046p00069700; hypothetical protein; K00588 caffeoyl-CoA O-methyltransferase [EC:2.1.1.104] (A)	ko00945 Stilbenoid, diarylheptanoid and gingerol biosynthesis; ko00941 Flavonoid biosynthesis; ko00940 Phenylpropanoid biosynthesis; ko00360 Phenylalanine metabolism;	Q	O-methyltransferase
F02_cb14811_c0/f2p1/1547	SA	SPI2 protein [Picea abies]	1.066	--	0.59004	0.845	--	0.4303	0.123	Down	0.002461	0.155	--	0.083677	GO:0008152 metabolic process; GO:0042743 hydrogen peroxide metabolic process; GO:0006950 response to stress; GO:0072593 reactive oxygen species metabolic process; GO:0055114 oxidation-reduction process; GO:0044710 single-organism metabolic process; GO:0006979 response to oxidative stress; GO:0044699 single-organism process; GO:0044248 cellular catabolic process; GO:0050896 response to stimulus; G…	--	GO:0097159 organic cyclic compound binding; GO:1901363 heterocyclic compound binding; GO:0020037 heme binding; GO:0003824 catalytic activity; GO:0005488 binding; GO:0016209 antioxidant activity; GO:0004601 peroxidase activity; GO:0046906 tetrapyrrole binding; GO:0016491 oxidoreductase activity; GO:0016684 oxidoreductase activity, acting on peroxide as acceptor;	pda:103703770; peroxidase 72-like; K00430 peroxidase [EC:1.11.1.7] (A)	ko00940 Phenylpropanoid biosynthesis; ko00360 Phenylalanine metabolism;	--	--
F01_cb6283_c4/f1p0/1144	SA	AhpC/TSA family protein [Pinus massoniana]	1.052	--	0.6401	1.122	--	0.29526	1.254	Up	0.045278	1.175	--	0.28354	GO:0050794 regulation of cellular process; GO:0042592 homeostatic process; GO:0065008 regulation of biological quality; GO:0008152 metabolic process; GO:0050789 regulation of biological process; GO:0055114 oxidation-reduction process; GO:0044710 single-organism metabolic process; GO:0045454 cell redox homeostasis; GO:0044763 single-organism cellular process; GO:0019725 cellular homeostasis; GO:00…	--	GO:0016209 antioxidant activity; GO:0003824 catalytic activity; GO:0051920 peroxiredoxin activity; GO:0016491 oxidoreductase activity; GO:0016684 oxidoreductase activity, acting on peroxide as acceptor;	ppp:PHYPADRAFT_161426; hypothetical protein; K11188 peroxiredoxin 6, 1-Cys peroxiredoxin [EC:1.11.1.7 1.11.1.15 3.1.1.-] (A)	ko00940 Phenylpropanoid biosynthesis; ko00360 Phenylalanine metabolism;	O	Alkyl hydroperoxide reductase, thiol specific antioxidant and related enzymes
F02_cb4754_c10/f1p1/2209	SA	"""PREDICTED: Histidinol-phosphate aminotransferase 1, chloroplastic OS=Arabidopsis thaliana GN=HISN6A PE=1 SV=1"""	0.796	--	0.39386	1.124	--	0.44566	2.344	Up	0.0133553	1.659	Up	0.0307	GO:0006725 cellular aromatic compound metabolic process; GO:0016053 organic acid biosynthetic process; GO:0052803 imidazole-containing compound metabolic process; GO:0044699 single-organism process; GO:0009058 biosynthetic process; GO:0000105 histidine biosynthetic process; GO:1901566 organonitrogen compound biosynthetic process; GO:0044237 cellular metabolic process; GO:0071704 organic substance…	--	GO:0097159 organic cyclic compound binding; GO:1901363 heterocyclic compound binding; GO:0016769 transferase activity, transferring nitrogenous groups; GO:0003824 catalytic activity; GO:0005488 binding; GO:0043167 ion binding; GO:0043168 anion binding; GO:0008483 transaminase activity; GO:0004400 histidinol-phosphate transaminase activity; GO:0048037 cofactor binding; GO:0016740 transferase activ…	atr:s00180p00043090; AMTR_s00180p00043090; hypothetical protein; K00817 histidinol-phosphate aminotransferase [EC:2.6.1.9] (A)	ko01230 Biosynthesis of amino acids; ko00350 Tyrosine metabolism; ko00340 Histidine metabolism; ko00360 Phenylalanine metabolism; ko00960 Tropane, piperidine and pyridine alkaloid biosynthesis; ko00400 Phenylalanine, tyrosine and tryptophan biosynthesis;	E	Histidinol phosphate aminotransferase
F02_cb7717_c8/f1p0/1705	SA	predicted protein [Physcomitrella patens]	0.674	--	0.40722	0.946	--	0.5453	1.558	Up	0.0084241	1.11	--	0.60734	GO:0009072 aromatic amino acid family metabolic process; GO:0006725 cellular aromatic compound metabolic process; GO:0055114 oxidation-reduction process; GO:0044281 small molecule metabolic process; GO:0044763 single-organism cellular process; GO:1901360 organic cyclic compound metabolic process; GO:0006807 nitrogen compound metabolic process; GO:0044699 single-organism process; GO:0044238 primar…	--	GO:0016702 oxidoreductase activity, acting on single donors with incorporation of molecular oxygen, incorporation of two atoms of oxygen; GO:0003868 4-hydroxyphenylpyruvate dioxygenase activity; GO:0016701 oxidoreductase activity, acting on single donors with incorporation of molecular oxygen; GO:0003824 catalytic activity; GO:0051213 dioxygenase activity; GO:0016491 oxidoreductase activity;	ppp:PHYPADRAFT_204526; hypothetical protein; K00457 4-hydroxyphenylpyruvate dioxygenase [EC:1.13.11.27] (A)	ko00130 Ubiquinone and other terpenoid-quinone biosynthesis; ko00350 Tyrosine metabolism; ko00360 Phenylalanine metabolism;	E	4-hydroxyphenylpyruvate dioxygenase
F02_cb3960_c7/f2p0/2592	SA	PREDICTED: primary amine oxidase [Vitis vinifera]	1.314	--	0.135344	0.978	--	0.82772	0.535	Down	0.0112641	0.719	--	0.090315	GO:0008152 metabolic process; GO:0055114 oxidation-reduction process; GO:0044710 single-organism metabolic process; GO:0044699 single-organism process; GO:0006807 nitrogen compound metabolic process; GO:0009308 amine metabolic process; GO:0071704 organic substance metabolic process; GO:1901564 organonitrogen compound metabolic process;	--	GO:0046914 transition metal ion binding; GO:0003824 catalytic activity; GO:0005488 binding; GO:0043167 ion binding; GO:0046872 metal ion binding; GO:0043169 cation binding; GO:0008131 primary amine oxidase activity; GO:0005507 copper ion binding; GO:0016641 oxidoreductase activity, acting on the CH-NH2 group of donors, oxygen as acceptor; GO:0016638 oxidoreductase activity, acting on the CH-NH2 g…	cmo:103502378; copper amine oxidase 1; K00276 primary-amine oxidase [EC:1.4.3.21] (A)	ko00260 Glycine, serine and threonine metabolism; ko00410 beta-Alanine metabolism; ko00350 Tyrosine metabolism; ko00360 Phenylalanine metabolism; ko00950 Isoquinoline alkaloid biosynthesis; ko00960 Tropane, piperidine and pyridine alkaloid biosynthesis;	Q	Copper amine oxidase
F01_cb6028_c17/f1p0/1096	SA	PREDICTED: 4-coumarateNACoA ligase-like 7 OS=Arabidopsis thaliana GN=4CLL7 PE=1 SV=1	1.186	--	0.28284	1.304	--	0.22264	1.621	Up	0.015918	1.473	--	0.153443	GO:0008152 metabolic process;	--	GO:0003824 catalytic activity;	fve:101313178; 4-coumarateNACoA ligase 1-like; K01904 4-coumarateNACoA ligase [EC:6.2.1.12] (A)	ko00130 Ubiquinone and other terpenoid-quinone biosynthesis; ko00940 Phenylpropanoid biosynthesis; ko00360 Phenylalanine metabolism;	I	Acyl-CoA synthetase
F02_cb8436_c11/f8p0/1386	SA	PREDICTED: Peroxidase 12 OS=Arabidopsis thaliana GN=PER12 PE=1 SV=1	4.489	--	0.099401	0.696	--	0.82612	0.117	Down	0.027701	0.753	--	0.80164	GO:0008152 metabolic process; GO:0042743 hydrogen peroxide metabolic process; GO:0006950 response to stress; GO:0072593 reactive oxygen species metabolic process; GO:0055114 oxidation-reduction process; GO:0044710 single-organism metabolic process; GO:0006979 response to oxidative stress; GO:0044699 single-organism process; GO:0044248 cellular catabolic process; GO:0050896 response to stimulus; G…	--	GO:0097159 organic cyclic compound binding; GO:1901363 heterocyclic compound binding; GO:0020037 heme binding; GO:0003824 catalytic activity; GO:0005488 binding; GO:0016209 antioxidant activity; GO:0004601 peroxidase activity; GO:0046906 tetrapyrrole binding; GO:0016491 oxidoreductase activity; GO:0016684 oxidoreductase activity, acting on peroxide as acceptor;	pda:103703770; peroxidase 72-like; K00430 peroxidase [EC:1.11.1.7] (A)	ko00940 Phenylpropanoid biosynthesis; ko00360 Phenylalanine metabolism;	--	--
F01_cb12050_c16/f5p0/913	SA	unknown [Picea sitchensis]	1.006	--	0.97254	0.877	--	0.050941	0.502	Down	0.0120171	0.575	Down	0.02532	--	--	--	rcu:RCOM_0848350; light-inducible protein atls1, putative (EC:5.3.2.1); K07253 phenylpyruvate tautomerase [EC:5.3.2.1] (A)	ko00350 Tyrosine metabolism; ko00360 Phenylalanine metabolism;	V	Macrophage migration inhibitory factor
F01_cb5315_c1/f1p0/2292	SA	RecName: Full=Aspartate aminotransferase; Short=PpAAT; Flags: Precursor [Pinus pinaster]	0.755	--	0.43702	1.283	--	0.056681	1.726	Up	0.0069973	1.016	--	0.79666	GO:0009058 biosynthetic process; GO:0008152 metabolic process;	--	GO:0097159 organic cyclic compound binding; GO:1901363 heterocyclic compound binding; GO:0003824 catalytic activity; GO:0005488 binding; GO:0043167 ion binding; GO:0043168 anion binding; GO:0048037 cofactor binding; GO:0030170 pyridoxal phosphate binding;	vvi:100245826; bifunctional aspartate aminotransferase and glutamate/aspartate-prephenate aminotransferase; K15849 bifunctional aspartate aminotransferase and glutamate/aspartate-prephenate aminotransferase [EC:2.6.1.1 2.6.1.78 2.6.1.79] (A)	ko01230 Biosynthesis of amino acids; ko00350 Tyrosine metabolism; ko00360 Phenylalanine metabolism; ko00950 Isoquinoline alkaloid biosynthesis; ko00960 Tropane, piperidine and pyridine alkaloid biosynthesis; ko00400 Phenylalanine, tyrosine and tryptophan biosynthesis;	E	Kynurenine aminotransferase, glutamine transaminase K
F01_cb5000_c3238/f1p0/2568	ABA	"""PREDICTED: Zeta-carotene desaturase, chloroplastic/chromoplastic OS=Tagetes erecta PE=2 SV=1"""	--	--	--	0.552	Down	0.0021171	--	--	--	--	--	--	GO:0016116 carotenoid metabolic process; GO:0046148 pigment biosynthetic process; GO:0006720 isoprenoid metabolic process; GO:0044711 single-organism biosynthetic process; GO:0042440 pigment metabolic process; GO:0055114 oxidation-reduction process; GO:0044763 single-organism cellular process; GO:0044699 single-organism process; GO:0044255 cellular lipid metabolic process; GO:0009058 biosynthetic…	--	GO:0016719 carotene 7,8-desaturase activity; GO:0016705 oxidoreductase activity, acting on paired donors, with incorporation or reduction of molecular oxygen; GO:0003824 catalytic activity; GO:0016491 oxidoreductase activity;	vvi:100245154; zeta-carotene desaturase, chloroplastic/chromoplastic; K00514 zeta-carotene desaturase [EC:1.3.5.6] (A)	ko00906 Carotenoid biosynthesis;	Q	Amine oxidase
F02_cb4040_c14/f1p0/2474	ABA	"""PREDICTED: Zeta-carotene desaturase, chloroplastic/chromoplastic OS=Tagetes erecta PE=2 SV=1"""	--	--	--	4.461	Up	0.000155899	--	--	--	--	--	--	GO:0016116 carotenoid metabolic process; GO:0046148 pigment biosynthetic process; GO:0006720 isoprenoid metabolic process; GO:0044711 single-organism biosynthetic process; GO:0042440 pigment metabolic process; GO:0055114 oxidation-reduction process; GO:0044763 single-organism cellular process; GO:0044699 single-organism process; GO:0044255 cellular lipid metabolic process; GO:0009058 biosynthetic…	--	GO:0016719 carotene 7,8-desaturase activity; GO:0016705 oxidoreductase activity, acting on paired donors, with incorporation or reduction of molecular oxygen; GO:0003824 catalytic activity; GO:0016491 oxidoreductase activity;	vvi:100245154; zeta-carotene desaturase, chloroplastic/chromoplastic; K00514 zeta-carotene desaturase [EC:1.3.5.6] (A)	ko00906 Carotenoid biosynthesis;	Q	Amine oxidase
F01_cb2370_c12/f1p0/1701	ABA	"""PREDICTED: phytoene dehydrogenase, chloroplastic/chromoplastic isoform X2 [Elaeis guineensis]"""	0.583	--	0.20472	1.065	--	0.59788	2.378	Up	0.0120769	1.303	--	0.362	GO:0044699 single-organism process; GO:0008152 metabolic process; GO:0055114 oxidation-reduction process; GO:0044710 single-organism metabolic process;	--	GO:0003824 catalytic activity; GO:0016491 oxidoreductase activity;	ota:Ot10g02960; Amine oxidase (ISS); K02293 15-cis-phytoene desaturase [EC:1.3.5.5] (A)	ko00906 Carotenoid biosynthesis;	Q	Amine oxidase
F01_cb8007_c11/f1p1/1732	Signaling	PREDICTED: Abscisic acid receptor PYL8 OS=Arabidopsis thaliana GN=PYL8 PE=1 SV=1	0.54	Down	0.020357	--	--	--	--	--	--	--	--	--	--	--	--	tcc:TCM_016450; Regulatory components of ABA receptor 3; K14496 abscisic acid receptor PYR/PYL family (A)	ko04075 Plant hormone signal transduction;	--	--
F02_cb3339_c16/f1p0/2761	Signaling	PREDICTED: probable indole-3-acetic acid-amido synthetase GH3.5 [Elaeis guineensis]	0.382	Down	0.0136609	0.884	--	0.39406	4.496	Up	0.000119696	1.943	Up	0.040115	--	--	--	mus:103981532; probable indole-3-acetic acid-amido synthetase GH3.5; K14506 jasmonic acid-amino synthetase (A)	ko04075 Plant hormone signal transduction;	--	--
F01_cb4635_c14/f1p0/2373	Signaling	hypothetical protein AMTR_s00029p00181840 [Amborella trichopoda]	0.321	Down	0.0028386	1.19	--	0.52878	1.8	--	0.051662	0.486	Down	0.020281	GO:0016310 phosphorylation; GO:0044267 cellular protein metabolic process; GO:0044238 primary metabolic process; GO:0044237 cellular metabolic process; GO:0006796 phosphate-containing compound metabolic process; GO:0071704 organic substance metabolic process; GO:0008152 metabolic process; GO:0006468 protein phosphorylation; GO:0006793 phosphorus metabolic process; GO:0044260 cellular macromolecul…	--	GO:0005524 ATP binding; GO:1901265 nucleoside phosphate binding; GO:0016773 phosphotransferase activity, alcohol group as acceptor; GO:0001882 nucleoside binding; GO:0043167 ion binding; GO:0005515 protein binding; GO:0004672 protein kinase activity; GO:0000166 nucleotide binding; GO:0097159 organic cyclic compound binding; GO:1901363 heterocyclic compound binding; GO:0032549 ribonucleoside bindi…	atr:s00149p00051550; AMTR_s00149p00051550; hypothetical protein; K14500 BR-signaling kinase [EC:2.7.11.1] (A)	ko04075 Plant hormone signal transduction;	T	Serine/threonine protein kinase
F01_cb10502_c181/f1p4/822	Signaling	PREDICTED: Pathogenesis-related protein 1A OS=Nicotiana tabacum PE=1 SV=1	3.078	Up	0.0088033	2.302	Up	0.033459	0.553	Down	0.020981	0.739	--	0.3866	--	GO:0005576 extracellular region;	--	pda:103712272; pathogenesis-related protein PRB1-3-like; K13449 pathogenesis-related protein 1 (A)	ko04075 Plant hormone signal transduction; ko04626 Plant-pathogen interaction;	S	Defense-related protein containing SCP domain
F01_cb7908_c1/f1p0/1790	Signaling	PREDICTED: abscisic acid receptor PYL8-like [Nelumbo nucifera]	0.545	Down	0.00174493	--	--	--	--	--	--	--	--	--	--	--	--	tcc:TCM_016450; Regulatory components of ABA receptor 3; K14496 abscisic acid receptor PYR/PYL family (A)	ko04075 Plant hormone signal transduction;	--	--
F01_cb14083_c3/f1p0/1219	Signaling	"""hypothetical protein 2_3824_01, partial [Pinus radiata]"""	0.672	Down	0.0093006	0.883	--	0.28064	1.074	--	0.47072	0.818	--	0.110197	--	--	--	tcc:TCM_016450; Regulatory components of ABA receptor 3; K14496 abscisic acid receptor PYR/PYL family (A)	ko04075 Plant hormone signal transduction;	--	--
F01_cb8079_c8/f1p2/1092	Signaling	"""hypothetical protein 0_11684_01, partial [Pinus taeda]"""	0.317	Down	0.0193193	--	--	--	--	--	--	--	--	--	--	--	GO:0005515 protein binding; GO:0005488 binding;	atr:s00029p00217840; AMTR_s00029p00217840; hypothetical protein; K13463 coronatine-insensitive protein 1 (A)	ko04075 Plant hormone signal transduction;	R	Leucine rich repeat proteins, some proteins contain F-box
F01_cb10502_c232/f2p2/927	Signaling	PREDICTED: Pathogenesis-related protein 1A OS=Nicotiana tabacum PE=1 SV=1	0.565	--	0.23232	0.19	Down	0.023064	0.381	Down	0.0185967	1.13	--	0.93248	--	GO:0005576 extracellular region;	--	pda:103712272; pathogenesis-related protein PRB1-3-like; K13449 pathogenesis-related protein 1 (A)	ko04075 Plant hormone signal transduction; ko04626 Plant-pathogen interaction;	S	Defense-related protein containing SCP domain
F02_cb11101_c3/f1p0/1458	Signaling	PREDICTED: Probable carboxylesterase 18 OS=Arabidopsis thaliana GN=CXE18 PE=1 SV=1	1.241	--	0.117061	1.333	Up	0.035018	1.451	Up	0.025899	1.351	Up	0.020436	GO:0008152 metabolic process;	--	GO:0016787 hydrolase activity; GO:0003824 catalytic activity;	ppp:PHYPADRAFT_118478; GLP1; GLP1 GID1-like protein; K14493 gibberellin receptor GID1 [EC:3.-.-.-] (A)	ko04075 Plant hormone signal transduction;	V	Arylacetamide deacetylase
F02_cb4594_c7/f1p1/1945	Signaling	PREDICTED: Auxin transporter-like protein 1 OS=Medicago truncatula GN=LAX1 PE=2 SV=1	--	--	--	1.904	Up	0.021021	--	--	--	--	--	--	--	--	--	cam:101497816; auxin transporter-like protein 1-like; K13946 auxin influx carrier (AUX1 LAX family) (A)	ko04075 Plant hormone signal transduction;	E	Amino acid transporters
F01_cb2635_c10/f1p1/1955	Signaling	mitogen activated protein kinase 6 [Pinus taeda]	0.634	--	0.094959	1.012	--	0.8393	2.204	Up	3.92e-05	1.381	--	0.087077	GO:0016310 phosphorylation; GO:0044267 cellular protein metabolic process; GO:0044238 primary metabolic process; GO:0044237 cellular metabolic process; GO:0006796 phosphate-containing compound metabolic process; GO:0071704 organic substance metabolic process; GO:0008152 metabolic process; GO:0006468 protein phosphorylation; GO:0006793 phosphorus metabolic process; GO:0044260 cellular macromolecul…	--	GO:0005524 ATP binding; GO:1901265 nucleoside phosphate binding; GO:0016773 phosphotransferase activity, alcohol group as acceptor; GO:0001882 nucleoside binding; GO:0043167 ion binding; GO:0004672 protein kinase activity; GO:0000166 nucleotide binding; GO:0004702 signal transducer, downstream of receptor, with serine/threonine kinase activity; GO:0004871 signal transducer activity; GO:0004707 MA…	gmx:547616; MAPK2, GmMAPK2; mitogen-activated protein kinase 2; K14512 mitogen-activated protein kinase 6 [EC:2.7.11.24] (A)	ko04075 Plant hormone signal transduction;	T	Mitogen-activated protein kinase
