# Supplementary material for: Physiological, Proteomic, and Resin Yield-Related Genes Expression Analysis Provides Insights into the Mechanisms Regulating Resin Yield in Masson Pine
Source: Int J Mol Sci. 2023 Sep 7;24(18):13813. doi: 10.3390/ijms241813813 (PMC10531451; doi:10.3390/ijms241813813)
Supplement: Supplementary file 1 [file ijms-24-13813-s001.zip › Table S7.xlsx]

## Sheet: Sheet1
Table S7. Comparison of relative abundance of 12 selected proteins in the PRM validation.
Protein	Peptide	Retention time	LM8-1 Area	LM8-2 Area	LM8-3 Area	HM8-1 Area	HM8-2 Area	HM8-3 Area	LM8-1 Normalized Area	LM8-2 Normalized Area	LM8-3 Normalized Area	HM8-1 Normalized Area	HM8-2 Normalized Area	HM8-3 Normalized Area
F01_cb3773_c40/f1p0/2593	EASSELLPINYAGLAQAVK	46.25	35600000	35900000	39400000	119000000	124000000	117000000	0.453599	0.457422	0.502017	1.51625	1.57995	1.49076
F01_cb3773_c40/f1p0/2593	IDLPTLSDSDK	30.3	16600000	16700000	15500000	57200000	47200000	58800000	0.469811	0.472642	0.438679	1.61887	1.33585	1.66415
F02_cb10231_c14/f1p6/1792	LIGLAGEVNVQGEQQK	29.28	23700000	22200000	22400000	97100000	94900000	83900000	0.413132	0.386984	0.390471	1.69262	1.65427	1.46252
F02_cb10231_c14/f1p6/1792	TSILVSEEDEQATFVEPSK	32.24	19400000	18800000	19700000	57200000	56100000	55100000	0.514361	0.498453	0.522316	1.51657	1.48741	1.46089
F02_cb5726_c24/f1p0/2338	NVNLPGVVVDLPTLTEK	48.06	8140000	8320000	8860000	31300000	31100000	28500000	0.420237	0.42953	0.457408	1.6159	1.60558	1.47135
F02_cb5726_c24/f1p0/2338	ATLIVVLTR	37.12	10300000	10100000	8510000	28400000	29400000	20300000	0.577516	0.566302	0.477152	1.59237	1.64844	1.13821
F02_cb6320_c27/f1p3/2026	YDVGNLAPPAPQFR	34.16	5400000	5480000	5420000	99200000	98000000	91200000	0.106334	0.107909	0.106728	1.9534	1.92977	1.79586
F02_cb6320_c27/f1p3/2026	IVASGNDYCVWER	26.56	9480000	9540000	9470000	31700000	31600000	31400000	0.461726	0.464648	0.461239	1.54396	1.53909	1.52934
F02_cb4198_c17/f1p1/2646	ETPSVAGIVNPGSEGFQK	31.05	15200000	14300000	14700000	133000000	133000000	131000000	0.206709	0.19447	0.199909	1.8087	1.8087	1.7815
F02_cb4198_c17/f1p1/2646	IGDTAGTIDNIIQCK	31.31	8580000	8820000	8630000	58100000	50400000	55300000	0.27119	0.278776	0.27277	1.83638	1.593	1.74788
F02_cb8967_c5/f1p0/1152	SLLQSDALYQYILETSVYPR	53.78	6200000	6410000	5280000	9800000	9420000	9270000	0.80207	0.829237	0.683053	1.26779	1.21863	1.19922
F01_cb9078_c1/f1p0/1740	FVTFTAIGVYIEK	47.1	13500000	13600000	13100000	22200000	23500000	22700000	0.745856	0.751381	0.723757	1.22652	1.29834	1.25414
F01_cb9078_c1/f1p0/1740	VTLILPLSGAQYSEK	43.02	166000000	180000000	201000000	345000000	322000000	326000000	0.646753	0.701299	0.783117	1.34416	1.25455	1.27013
F01_cb12246_c23/f4p3/1470	HLLDIPGAAER	25.46	28400000	25200000	29200000	59800000	65300000	60200000	0.635584	0.563969	0.653488	1.33831	1.4614	1.34726
F01_cb12246_c23/f4p3/1470	EQQLSAGSISLVHVDDLCK	34.14	5900000	6200000	6350000	10100000	9940000	10100000	0.728545	0.76559	0.784112	1.24717	1.22741	1.24717
F01_cb4100_c5/f1p0/2440	YISSTCDATIVQVAK	26.39	2070000	2160000	2190000	5110000	5280000	4910000	0.571823	0.596685	0.604972	1.4116	1.45856	1.35635
F01_cb4100_c5/f1p0/2440	LLDLGFK	34.52	1740000	2000000	1930000	3980000	4010000	3970000	0.592172	0.680658	0.656835	1.35451	1.36472	1.35111
F02_cb9389_c126/f1p1/933	ETPEAHIFK	16.04	2080000000	2100000000	2200000000	3900000000	3980000000	3650000000	0.696817	0.703518	0.737018	1.30653	1.33333	1.22278
F02_cb9389_c126/f1p1/933	ADLPGLK	19.72	7200000000	7270000000	7560000000	12500000000	12400000000	12700000000	0.724468	0.731511	0.760691	1.25776	1.24769	1.27788
F02_cb9389_c126/f1p1/933	QPEPQPPQPK	11.15	39000000	41400000	39200000	52400000	50000000	51400000	0.855889	0.908559	0.860278	1.14996	1.09729	1.12802
F01_cb8663_c54/f1p5/1702	YFPTQALNFAFK	45.6	58900000	56800000	54900000	237000000	235000000	224000000	0.407801	0.393261	0.380106	1.6409	1.62705	1.55089
F01_cb8663_c54/f1p5/1702	GAGANILR	14.5	46800000	46700000	46200000	140000000	140000000	141000000	0.500803	0.499732	0.494382	1.49813	1.49813	1.50883
F01_cb8673_c25/f1p1/1173	SNYTQLTELYNK	28.08	12600000	12600000	12900000	18600000	17500000	16400000	0.834437	0.834437	0.854305	1.23179	1.15894	1.08609
F01_cb8673_c25/f1p1/1173	AEFPIFDK	33.34	93100000	97400000	97000000	138000000	145000000	132000000	0.79516	0.831886	0.82847	1.17865	1.23843	1.1274
