# Supplementary material for: Physiological, Proteomic, and Resin Yield-Related Genes Expression Analysis Provides Insights into the Mechanisms Regulating Resin Yield in Masson Pine
Source: Int J Mol Sci. 2023 Sep 7;24(18):13813. doi: 10.3390/ijms241813813 (PMC10531451; doi:10.3390/ijms241813813)
Supplement: Supplementary file 1 [file ijms-24-13813-s001.zip › Table S8.xlsx]

## Sheet: Sheet1
Table S8. Primers of genes used for qRT-PCR.
ID	Gene	Forward primer (5'–3')	Reverse primer (5'–3')
F01_cb9730_c8/f1p2/1083	MDS	GTGGTGGGAGTGCTAAGCCT	CACAGCCTCGATCATGGGGT
F02_cb3250_c20/f1p0/2877	HDS	CCAGCAGGTACACGTTTGGC	TCGAGATGCATGGACACGGT
F02_cb11169_c4/f3p0/1199	IDI	CATTGTTCGGGATGTTGCTGTG	GCCAGACGGAACCAAGGTGAAA
F01_cb5926_c21/f1p1/2074	MonoTPS2	TTATGGGGAACCTTCTTATCG	CCACATCCAATGCCTTTTT
F01_cb6807_c5/f1p1/2078	AOS	AACAGGGACGAGTTCTTCAGG	AGGAAAGCGTGCGGTAGCC
F02_cb11101_c3/f1p0/1458	GID1	CAGTGGCTCAGTTGGTTTGC	CCTCTAGTGGGCGTCTCGTT
F02_cb10002_c21/f1p0/1156	GST	GCTCTGCGAACCAACGACTG	CTCCACGCCTGTGATAAACG
F02_cb8256_c84/f1p3/1766	UGT91A1	TGTGGATTGCCCCTCATTCT	TCCACTGCTTTCGACCTCAT
Reference gene	SKI	CACGCCTTCACAGCAATCAG	CCTCCTGTAGCCCTCTTCCAT
