# Supplementary figures and images for: Physiological, Proteomic, and Resin Yield-Related Genes Expression Analysis Provides Insights into the Mechanisms Regulating Resin Yield in Masson Pine
Source: MDPI journal article supplement (doi:10.3390/ijms241813813), 2023-09-07

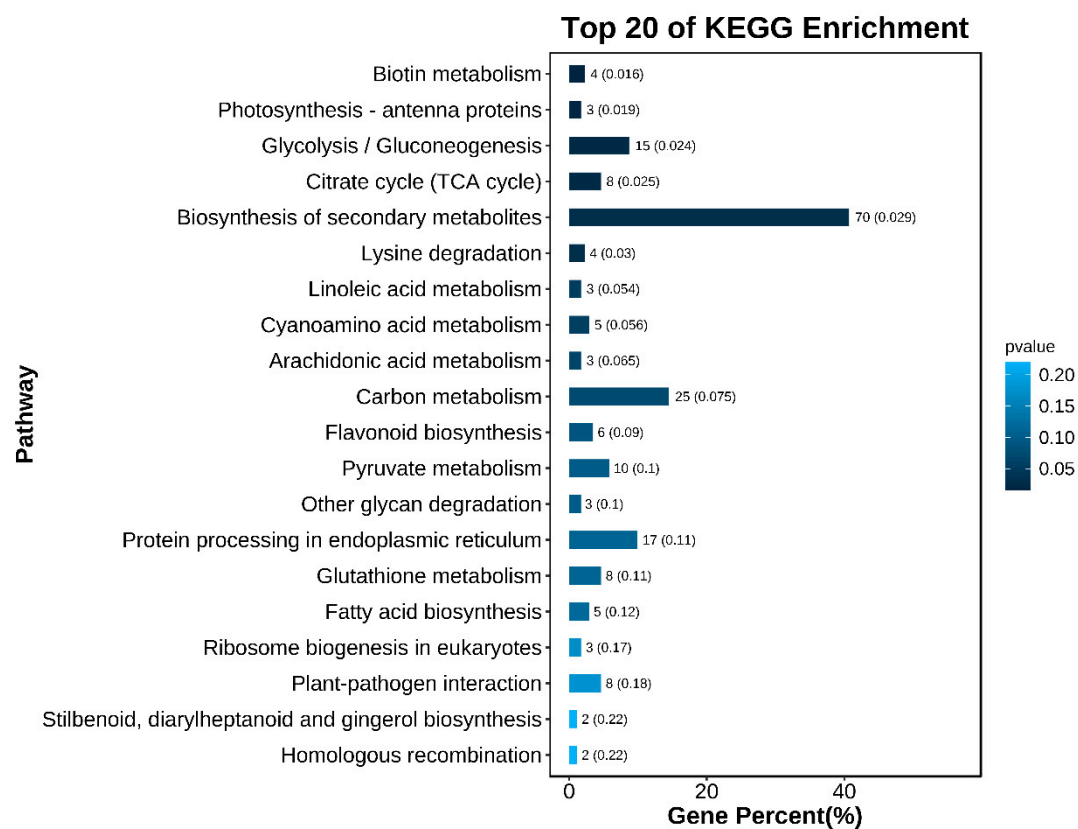

**Figure S3.** KEGG enrichment pathways of DEPs in clusters 4, 7, 1, and 5.

Supplement: s1 [file s1]
